# Supplementary material for: The Genome of Akkermansia muciniphila, a Dedicated Intestinal Mucin Degrader, and Its Use in Exploring Intestinal Metagenomes
Source: PLoS One. 2011 Mar 3;6(3):e16876. doi: 10.1371/journal.pone.0016876 (PMC3048395; doi:10.1371/journal.pone.0016876)
Supplement: Table S4 — The presence of 16S ribosomal sequences (>95% identical to that of Akkermansia muciniphila ) in the metagenomic databases. (DOCX) [file pone.0016876.s005.xlsx]

## Sheet: Sheet1
Supplementary Table 5. Lists of predicted Akkermansia contigs for the 37 metagenomic databases.
A	B	C	CD1	CD2	D	E	F1-S	F1-T	F1-U	F2-V	F2-W	F2-X	F2-Y	G	Ln-A	Ln-B	Ln-D	Ln-E	Ln-M	Ln-R	MH12	MH13	MH30	MH6	NO1	NO3	NO4	NO8	OB1	OB2	OB6	OB8	Subject7	Subject8	UC4	UC6
MC20.MG16.AS1.I1.C10036	MC20.MG17.AS1.I1.C10171	MC20.MG18.AS1.I1.C11022	(none)	MC20.MG30.AS1.I1.C1000	(none)	MC20.MG20.AS1.I1.C10059	MC20.MG3.AS1.I1.C10969	(none)	(none)	MC20.MG5.AS1.I1.C11172	MC20.MG6.AS1.I1.C12386	MC20.MG7.AS1.I1.C10047	MC20.MG8.AS1.I1.C10606	MC20.MG21.AS1.I1.C10003	(none)	(none)	(none)	(none)	MC20.MG15.AS1.I1.C6374	(none)	MC20.MG31.AS1.I1.C10048	MC20.MG30.AS1.I1.C1000	(none)	MC20.MG29.AS1.I22.R12773	MC20.MG22.AS1.I1.C10101	MC20.MG23.AS1.I1.C10005	MC20.MG24.AS1.I1.C10004	MC20.MG25.AS1.I1.C10013	(none)	(none)	MC20.MG28.AS1.I1.C10045	MC20.MG37.AS1.I1.C10048	(none)	(none)	MC20.MG35.AS1.I29.R42953	MC20.MG36.AS1.I1.C1006
MC20.MG16.AS1.I1.C10074	MC20.MG17.AS1.I1.C10541	MC20.MG18.AS1.I1.C11946		MC20.MG30.AS1.I1.C1001		MC20.MG20.AS1.I1.C10114	MC20.MG3.AS1.I1.C12912			MC20.MG5.AS1.I1.C12229	MC20.MG6.AS1.I1.C8255	MC20.MG7.AS1.I1.C10229	MC20.MG8.AS1.I1.C11027	MC20.MG21.AS1.I1.C10023							MC20.MG31.AS1.I1.C10057	MC20.MG30.AS1.I1.C1001		MC20.MG29.AS1.I22.R23992	MC20.MG22.AS1.I1.C10159	MC20.MG23.AS1.I1.C1001	MC20.MG24.AS1.I1.C10006	MC20.MG25.AS1.I1.C10033			MC20.MG28.AS1.I1.C10087	MC20.MG37.AS1.I1.C10050				MC20.MG36.AS1.I1.C1007
MC20.MG16.AS1.I1.C10363	MC20.MG17.AS1.I1.C11131	MC20.MG18.AS1.I1.C12304		MC20.MG30.AS1.I1.C1002		MC20.MG20.AS1.I1.C10144	MC20.MG3.AS1.I1.C13867			MC20.MG5.AS1.I1.C14731	MC20.MG6.AS1.I1.C8752	MC20.MG7.AS1.I1.C10340	MC20.MG8.AS1.I1.C11605	MC20.MG21.AS1.I1.C10027							MC20.MG31.AS1.I1.C10116	MC20.MG30.AS1.I1.C1002		MC20.MG29.AS1.I22.R33981	MC20.MG22.AS1.I1.C10186	MC20.MG23.AS1.I1.C1002	MC20.MG24.AS1.I1.C10016	MC20.MG25.AS1.I1.C10038			MC20.MG28.AS1.I1.C10183	MC20.MG37.AS1.I1.C10055				MC20.MG36.AS1.I1.C1008
MC20.MG16.AS1.I1.C10695	MC20.MG17.AS1.I1.C1123	MC20.MG18.AS1.I1.C12324		MC20.MG30.AS1.I1.C1003		MC20.MG20.AS1.I1.C10145	MC20.MG3.AS1.I1.C4817			MC20.MG5.AS1.I1.C15579	MC20.MG6.AS1.I7.R16375	MC20.MG7.AS1.I1.C10464	MC20.MG8.AS1.I1.C11811	MC20.MG21.AS1.I1.C10487							MC20.MG31.AS1.I1.C10137	MC20.MG30.AS1.I1.C1003		MC20.MG29.AS1.I22.R3563	MC20.MG22.AS1.I1.C10381	MC20.MG23.AS1.I1.C1003	MC20.MG24.AS1.I1.C10018	MC20.MG25.AS1.I1.C10125			MC20.MG28.AS1.I1.C10271	MC20.MG37.AS1.I1.C10063				MC20.MG36.AS1.I1.C1009
MC20.MG16.AS1.I1.C10817	MC20.MG17.AS1.I1.C1199	MC20.MG18.AS1.I1.C12389		MC20.MG30.AS1.I1.C1004		MC20.MG20.AS1.I1.C10172	MC20.MG3.AS1.I1.C5101			MC20.MG5.AS1.I1.C4055	MC20.MG6.AS1.I7.R17423	MC20.MG7.AS1.I1.C10506	MC20.MG8.AS1.I1.C11910	MC20.MG21.AS1.I1.C11985							MC20.MG31.AS1.I1.C10142	MC20.MG30.AS1.I1.C1004		MC20.MG29.AS1.I22.R40166	MC20.MG22.AS1.I1.C10417	MC20.MG23.AS1.I1.C1004	MC20.MG24.AS1.I1.C10076	MC20.MG25.AS1.I1.C10264			MC20.MG28.AS1.I1.C10272	MC20.MG37.AS1.I1.C10079				MC20.MG36.AS1.I1.C10091
MC20.MG16.AS1.I1.C11009	MC20.MG17.AS1.I1.C1202	MC20.MG18.AS1.I1.C12429		MC20.MG30.AS1.I1.C10157		MC20.MG20.AS1.I1.C10180	MC20.MG3.AS1.I1.C6995			MC20.MG5.AS1.I1.C4521	MC20.MG6.AS1.I7.R17424	MC20.MG7.AS1.I1.C10533	MC20.MG8.AS1.I1.C12053	MC20.MG21.AS1.I1.C12001							MC20.MG31.AS1.I1.C10155	MC20.MG30.AS1.I1.C10157		MC20.MG29.AS1.I22.R41022	MC20.MG22.AS1.I1.C10557	MC20.MG23.AS1.I1.C1005	MC20.MG24.AS1.I1.C10103	MC20.MG25.AS1.I1.C10390			MC20.MG28.AS1.I1.C10360	MC20.MG37.AS1.I1.C10120				MC20.MG36.AS1.I1.C1010
MC20.MG16.AS1.I1.C11392	MC20.MG17.AS1.I1.C1299	MC20.MG18.AS1.I1.C12563		MC20.MG30.AS1.I1.C1037		MC20.MG20.AS1.I1.C10185	MC20.MG3.AS1.I1.C7272			MC20.MG5.AS1.I1.C5519	MC20.MG6.AS1.I7.R4007	MC20.MG7.AS1.I1.C10726	MC20.MG8.AS1.I1.C12240	MC20.MG21.AS1.I1.C3960							MC20.MG31.AS1.I1.C1028	MC20.MG30.AS1.I1.C1037		MC20.MG29.AS1.I22.R44567	MC20.MG22.AS1.I1.C10561	MC20.MG23.AS1.I1.C1006	MC20.MG24.AS1.I1.C10116	MC20.MG25.AS1.I1.C10474			MC20.MG28.AS1.I1.C10395	MC20.MG37.AS1.I1.C10236				MC20.MG36.AS1.I1.C1011
MC20.MG16.AS1.I1.C11423	MC20.MG17.AS1.I1.C1331	MC20.MG18.AS1.I1.C12727		MC20.MG30.AS1.I1.C1038		MC20.MG20.AS1.I1.C10216	MC20.MG3.AS1.I1.C9242			MC20.MG5.AS1.I1.C6593	MC20.MG6.AS1.I7.R5094	MC20.MG7.AS1.I1.C10771	MC20.MG8.AS1.I1.C12632	MC20.MG21.AS1.I1.C4581							MC20.MG31.AS1.I1.C1029	MC20.MG30.AS1.I1.C1038		MC20.MG29.AS1.I22.R49184	MC20.MG22.AS1.I1.C10611	MC20.MG23.AS1.I1.C1007	MC20.MG24.AS1.I1.C10130	MC20.MG25.AS1.I1.C10510			MC20.MG28.AS1.I1.C10406	MC20.MG37.AS1.I1.C10274				MC20.MG36.AS1.I1.C1012
MC20.MG16.AS1.I1.C11761	MC20.MG17.AS1.I1.C1371	MC20.MG18.AS1.I1.C12825		MC20.MG30.AS1.I1.C1039		MC20.MG20.AS1.I1.C10302	MC20.MG3.AS1.I1.C9315			MC20.MG5.AS1.I1.C7492	MC20.MG6.AS1.I7.R5095	MC20.MG7.AS1.I1.C10930	MC20.MG8.AS1.I1.C12910	MC20.MG21.AS1.I1.C5229							MC20.MG31.AS1.I1.C1030	MC20.MG30.AS1.I1.C1039		MC20.MG29.AS1.I22.R64706	MC20.MG22.AS1.I1.C10615	MC20.MG23.AS1.I1.C1008	MC20.MG24.AS1.I1.C10167	MC20.MG25.AS1.I1.C10665			MC20.MG28.AS1.I1.C10422	MC20.MG37.AS1.I1.C10288				MC20.MG36.AS1.I1.C1013
MC20.MG16.AS1.I1.C11970	MC20.MG17.AS1.I1.C1601	MC20.MG18.AS1.I1.C13246		MC20.MG30.AS1.I1.C1041		MC20.MG20.AS1.I1.C10303	MC20.MG3.AS1.I1.C9425			MC20.MG5.AS1.I1.C9485		MC20.MG7.AS1.I1.C1099	MC20.MG8.AS1.I1.C13189	MC20.MG21.AS1.I1.C5417							MC20.MG31.AS1.I1.C1031	MC20.MG30.AS1.I1.C1041		MC20.MG29.AS1.I22.R66284	MC20.MG22.AS1.I1.C10786	MC20.MG23.AS1.I1.C10088	MC20.MG24.AS1.I1.C10180	MC20.MG25.AS1.I1.C10690			MC20.MG28.AS1.I1.C10556	MC20.MG37.AS1.I1.C10307				MC20.MG36.AS1.I1.C10139
MC20.MG16.AS1.I1.C3206	MC20.MG17.AS1.I1.C1634	MC20.MG18.AS1.I1.C13415		MC20.MG30.AS1.I1.C10421		MC20.MG20.AS1.I1.C10308	MC20.MG3.AS1.I10.R11035			MC20.MG5.AS1.I2.C78		MC20.MG7.AS1.I1.C11015	MC20.MG8.AS1.I1.C13483	MC20.MG21.AS1.I1.C7590							MC20.MG31.AS1.I1.C1032	MC20.MG30.AS1.I1.C10421		MC20.MG29.AS1.I22.R68322	MC20.MG22.AS1.I1.C10817	MC20.MG23.AS1.I1.C1009	MC20.MG24.AS1.I1.C10264	MC20.MG25.AS1.I1.C10732			MC20.MG28.AS1.I1.C10576	MC20.MG37.AS1.I1.C10336				MC20.MG36.AS1.I1.C10168
MC20.MG16.AS1.I1.C3526	MC20.MG17.AS1.I1.C1841	MC20.MG18.AS1.I1.C13565		MC20.MG30.AS1.I1.C10619		MC20.MG20.AS1.I1.C10366	MC20.MG3.AS1.I10.R11036			MC20.MG5.AS1.I9.R10863		MC20.MG7.AS1.I1.C11097	MC20.MG8.AS1.I1.C6731	MC20.MG21.AS1.I1.C8130							MC20.MG31.AS1.I1.C1033	MC20.MG30.AS1.I1.C10619		MC20.MG29.AS1.I22.R75468	MC20.MG22.AS1.I1.C10968	MC20.MG23.AS1.I1.C1010	MC20.MG24.AS1.I1.C10325	MC20.MG25.AS1.I1.C1076			MC20.MG28.AS1.I1.C10666	MC20.MG37.AS1.I1.C10411				MC20.MG36.AS1.I1.C10303
MC20.MG16.AS1.I1.C3829	MC20.MG17.AS1.I1.C1937	MC20.MG18.AS1.I1.C13583		MC20.MG30.AS1.I1.C1062		MC20.MG20.AS1.I1.C10406	MC20.MG3.AS1.I10.R129			MC20.MG5.AS1.I9.R10864		MC20.MG7.AS1.I1.C11162	MC20.MG8.AS1.I1.C7100	MC20.MG21.AS1.I1.C9030							MC20.MG31.AS1.I1.C10349	MC20.MG30.AS1.I1.C1062		MC20.MG29.AS1.I22.R76466	MC20.MG22.AS1.I1.C11124	MC20.MG23.AS1.I1.C10102	MC20.MG24.AS1.I1.C10332	MC20.MG25.AS1.I1.C1077			MC20.MG28.AS1.I1.C10696	MC20.MG37.AS1.I1.C10446				MC20.MG36.AS1.I1.C10315
MC20.MG16.AS1.I1.C4176	MC20.MG17.AS1.I1.C1961	MC20.MG18.AS1.I1.C13730		MC20.MG30.AS1.I1.C1063		MC20.MG20.AS1.I1.C10456	MC20.MG3.AS1.I10.R1292			MC20.MG5.AS1.I9.R12974		MC20.MG7.AS1.I1.C11199	MC20.MG8.AS1.I1.C7214	MC20.MG21.AS1.I18.C77							MC20.MG31.AS1.I1.C10430	MC20.MG30.AS1.I1.C1063		MC20.MG29.AS1.I22.R81385	MC20.MG22.AS1.I1.C11283	MC20.MG23.AS1.I1.C1011	MC20.MG24.AS1.I1.C10345	MC20.MG25.AS1.I1.C1078			MC20.MG28.AS1.I1.C10972	MC20.MG37.AS1.I1.C1134				MC20.MG36.AS1.I1.C10421
MC20.MG16.AS1.I1.C4370	MC20.MG17.AS1.I1.C2009	MC20.MG18.AS1.I1.C14471		MC20.MG30.AS1.I1.C1064		MC20.MG20.AS1.I1.C10471	MC20.MG3.AS1.I10.R1293			MC20.MG5.AS1.I9.R12975		MC20.MG7.AS1.I1.C11268	MC20.MG8.AS1.I1.C7976	MC20.MG21.AS1.I19.R10113							MC20.MG31.AS1.I1.C10503	MC20.MG30.AS1.I1.C1064		MC20.MG29.AS1.I22.R82242	MC20.MG22.AS1.I1.C11320	MC20.MG23.AS1.I1.C10115	MC20.MG24.AS1.I1.C10410	MC20.MG25.AS1.I1.C10928			MC20.MG28.AS1.I1.C10999	MC20.MG37.AS1.I1.C1135				MC20.MG36.AS1.I1.C10435
MC20.MG16.AS1.I1.C4954	MC20.MG17.AS1.I1.C2020	MC20.MG18.AS1.I1.C14475		MC20.MG30.AS1.I1.C1065		MC20.MG20.AS1.I1.C10472	MC20.MG3.AS1.I10.R16358			MC20.MG5.AS1.I9.R13727		MC20.MG7.AS1.I1.C1129	MC20.MG8.AS1.I1.C8032	MC20.MG21.AS1.I19.R10298							MC20.MG31.AS1.I1.C10506	MC20.MG30.AS1.I1.C1065		MC20.MG29.AS1.I22.R9042	MC20.MG22.AS1.I1.C11406	MC20.MG23.AS1.I1.C10120	MC20.MG24.AS1.I1.C10412	MC20.MG25.AS1.I1.C10931			MC20.MG28.AS1.I1.C11001	MC20.MG37.AS1.I1.C1136				MC20.MG36.AS1.I1.C10443
MC20.MG16.AS1.I1.C5297	MC20.MG17.AS1.I1.C2021	MC20.MG18.AS1.I1.C14532		MC20.MG30.AS1.I1.C1066		MC20.MG20.AS1.I1.C10473	MC20.MG3.AS1.I10.R16359			MC20.MG5.AS1.I9.R13728		MC20.MG7.AS1.I1.C11393	MC20.MG8.AS1.I1.C8363	MC20.MG21.AS1.I19.R10421							MC20.MG31.AS1.I1.C10560	MC20.MG30.AS1.I1.C1066			MC20.MG22.AS1.I1.C11419	MC20.MG23.AS1.I1.C10124	MC20.MG24.AS1.I1.C10436	MC20.MG25.AS1.I1.C10940			MC20.MG28.AS1.I1.C11238	MC20.MG37.AS1.I1.C1246				MC20.MG36.AS1.I1.C1046
MC20.MG16.AS1.I1.C5319	MC20.MG17.AS1.I1.C2082	MC20.MG18.AS1.I1.C1670		MC20.MG30.AS1.I1.C1067		MC20.MG20.AS1.I1.C10509	MC20.MG3.AS1.I10.R4028			MC20.MG5.AS1.I9.R14393		MC20.MG7.AS1.I1.C11434	MC20.MG8.AS1.I1.C8616	MC20.MG21.AS1.I19.R1090							MC20.MG31.AS1.I1.C10621	MC20.MG30.AS1.I1.C1067			MC20.MG22.AS1.I1.C11767	MC20.MG23.AS1.I1.C10169	MC20.MG24.AS1.I1.C10442	MC20.MG25.AS1.I1.C10942			MC20.MG28.AS1.I1.C11290	MC20.MG37.AS1.I1.C1247				MC20.MG36.AS1.I1.C1047
MC20.MG16.AS1.I1.C5515	MC20.MG17.AS1.I1.C2092	MC20.MG18.AS1.I1.C5087		MC20.MG30.AS1.I1.C11024		MC20.MG20.AS1.I1.C10519	MC20.MG3.AS1.I10.R5410			MC20.MG5.AS1.I9.R14394		MC20.MG7.AS1.I1.C11456	MC20.MG8.AS1.I1.C9100	MC20.MG21.AS1.I19.R11387							MC20.MG31.AS1.I1.C10648	MC20.MG30.AS1.I1.C11024			MC20.MG22.AS1.I1.C12031	MC20.MG23.AS1.I1.C10171	MC20.MG24.AS1.I1.C10482	MC20.MG25.AS1.I1.C10961			MC20.MG28.AS1.I1.C11364	MC20.MG37.AS1.I1.C1321				MC20.MG36.AS1.I1.C1048
MC20.MG16.AS1.I1.C5961	MC20.MG17.AS1.I1.C2093	MC20.MG18.AS1.I1.C5590		MC20.MG30.AS1.I1.C1105		MC20.MG20.AS1.I1.C10576	MC20.MG3.AS1.I10.R7493			MC20.MG5.AS1.I9.R16138		MC20.MG7.AS1.I1.C11490	MC20.MG8.AS1.I1.C9236	MC20.MG21.AS1.I19.R1154							MC20.MG31.AS1.I1.C10945	MC20.MG30.AS1.I1.C1105			MC20.MG22.AS1.I1.C12087	MC20.MG23.AS1.I1.C10206	MC20.MG24.AS1.I1.C10488	MC20.MG25.AS1.I1.C11044			MC20.MG28.AS1.I1.C11799	MC20.MG37.AS1.I1.C1322				MC20.MG36.AS1.I1.C1049
MC20.MG16.AS1.I1.C5996	MC20.MG17.AS1.I1.C2109	MC20.MG18.AS1.I1.C5954		MC20.MG30.AS1.I1.C1106		MC20.MG20.AS1.I1.C10632	MC20.MG3.AS1.I10.R7494			MC20.MG5.AS1.I9.R16139		MC20.MG7.AS1.I1.C11589	MC20.MG8.AS1.I6.R10978	MC20.MG21.AS1.I19.R1205							MC20.MG31.AS1.I1.C10981	MC20.MG30.AS1.I1.C1106			MC20.MG22.AS1.I1.C12289	MC20.MG23.AS1.I1.C10236	MC20.MG24.AS1.I1.C10571	MC20.MG25.AS1.I1.C11067			MC20.MG28.AS1.I1.C11961	MC20.MG37.AS1.I1.C1348				MC20.MG36.AS1.I1.C1050
MC20.MG16.AS1.I1.C6055	MC20.MG17.AS1.I1.C2128	MC20.MG18.AS1.I1.C7100		MC20.MG30.AS1.I1.C1107		MC20.MG20.AS1.I1.C10664	MC20.MG3.AS1.I10.R7969			MC20.MG5.AS1.I9.R17161		MC20.MG7.AS1.I1.C11623	MC20.MG8.AS1.I6.R10979	MC20.MG21.AS1.I19.R12207							MC20.MG31.AS1.I1.C10991	MC20.MG30.AS1.I1.C1107			MC20.MG22.AS1.I1.C12326	MC20.MG23.AS1.I1.C1025	MC20.MG24.AS1.I1.C10640	MC20.MG25.AS1.I1.C11087			MC20.MG28.AS1.I1.C11962	MC20.MG37.AS1.I1.C1369				MC20.MG36.AS1.I1.C1051
MC20.MG16.AS1.I1.C6093	MC20.MG17.AS1.I1.C2345	MC20.MG18.AS1.I1.C7183		MC20.MG30.AS1.I1.C1108		MC20.MG20.AS1.I1.C10705	MC20.MG3.AS1.I10.R8370			MC20.MG5.AS1.I9.R17162		MC20.MG7.AS1.I1.C11712	MC20.MG8.AS1.I6.R11344	MC20.MG21.AS1.I19.R12289							MC20.MG31.AS1.I1.C11017	MC20.MG30.AS1.I1.C1108			MC20.MG22.AS1.I1.C12469	MC20.MG23.AS1.I1.C1026	MC20.MG24.AS1.I1.C10663	MC20.MG25.AS1.I1.C11138			MC20.MG28.AS1.I1.C12055	MC20.MG37.AS1.I1.C1370				MC20.MG36.AS1.I1.C10514
MC20.MG16.AS1.I1.C6215	MC20.MG17.AS1.I1.C2346	MC20.MG18.AS1.I1.C7185		MC20.MG30.AS1.I1.C1109		MC20.MG20.AS1.I1.C10729	MC20.MG3.AS1.I10.R9777			MC20.MG5.AS1.I9.R19965		MC20.MG7.AS1.I1.C11757	MC20.MG8.AS1.I6.R11345	MC20.MG21.AS1.I19.R123							MC20.MG31.AS1.I1.C11049	MC20.MG30.AS1.I1.C1109			MC20.MG22.AS1.I1.C12497	MC20.MG23.AS1.I1.C10268	MC20.MG24.AS1.I1.C10673	MC20.MG25.AS1.I1.C11145			MC20.MG28.AS1.I1.C12231	MC20.MG37.AS1.I1.C1371				MC20.MG36.AS1.I1.C1052
MC20.MG16.AS1.I1.C6622	MC20.MG17.AS1.I1.C2370	MC20.MG18.AS1.I1.C7218		MC20.MG30.AS1.I1.C1110		MC20.MG20.AS1.I1.C10749				MC20.MG5.AS1.I9.R19966		MC20.MG7.AS1.I1.C11829	MC20.MG8.AS1.I6.R12455	MC20.MG21.AS1.I19.R12336							MC20.MG31.AS1.I1.C11066	MC20.MG30.AS1.I1.C1110			MC20.MG22.AS1.I1.C12526	MC20.MG23.AS1.I1.C1027	MC20.MG24.AS1.I1.C10790	MC20.MG25.AS1.I1.C11310			MC20.MG28.AS1.I1.C12287	MC20.MG37.AS1.I1.C1418				MC20.MG36.AS1.I1.C1053
MC20.MG16.AS1.I1.C7046	MC20.MG17.AS1.I1.C2436	MC20.MG18.AS1.I1.C7236				MC20.MG20.AS1.I1.C10787				MC20.MG5.AS1.I9.R2554		MC20.MG7.AS1.I1.C1433	MC20.MG8.AS1.I6.R13655	MC20.MG21.AS1.I19.R13041							MC20.MG31.AS1.I1.C11099	MC20.MG30.AS1.I1.C1111			MC20.MG22.AS1.I1.C12593	MC20.MG23.AS1.I1.C1028	MC20.MG24.AS1.I1.C10836	MC20.MG25.AS1.I1.C11417			MC20.MG28.AS1.I1.C12357	MC20.MG37.AS1.I1.C1419				MC20.MG36.AS1.I1.C10556
MC20.MG16.AS1.I1.C7050	MC20.MG17.AS1.I1.C2483	MC20.MG18.AS1.I1.C7483				MC20.MG20.AS1.I1.C10802				MC20.MG5.AS1.I9.R2871		MC20.MG7.AS1.I1.C1604	MC20.MG8.AS1.I6.R13968	MC20.MG21.AS1.I19.R13148							MC20.MG31.AS1.I1.C11133	MC20.MG30.AS1.I1.C1112			MC20.MG22.AS1.I1.C12803	MC20.MG23.AS1.I1.C1029	MC20.MG24.AS1.I1.C10853	MC20.MG25.AS1.I1.C11479			MC20.MG28.AS1.I1.C12358	MC20.MG37.AS1.I1.C1479				MC20.MG36.AS1.I1.C10559
MC20.MG16.AS1.I1.C7171	MC20.MG17.AS1.I1.C2536	MC20.MG18.AS1.I1.C8178				MC20.MG20.AS1.I1.C10833				MC20.MG5.AS1.I9.R3164		MC20.MG7.AS1.I1.C1709	MC20.MG8.AS1.I6.R13969	MC20.MG21.AS1.I19.R13155							MC20.MG31.AS1.I1.C11155	MC20.MG30.AS1.I1.C1113			MC20.MG22.AS1.I1.C12837	MC20.MG23.AS1.I1.C10293	MC20.MG24.AS1.I1.C10860	MC20.MG25.AS1.I1.C11529			MC20.MG28.AS1.I1.C12405	MC20.MG37.AS1.I1.C1480				MC20.MG36.AS1.I1.C10587
MC20.MG16.AS1.I1.C7559	MC20.MG17.AS1.I1.C2650	MC20.MG18.AS1.I1.C8615				MC20.MG20.AS1.I1.C10853				MC20.MG5.AS1.I9.R3165		MC20.MG7.AS1.I1.C1711	MC20.MG8.AS1.I6.R14002	MC20.MG21.AS1.I19.R13184							MC20.MG31.AS1.I1.C11345	MC20.MG30.AS1.I1.C1114			MC20.MG22.AS1.I1.C12862	MC20.MG23.AS1.I1.C1030	MC20.MG24.AS1.I1.C10878	MC20.MG25.AS1.I1.C11544			MC20.MG28.AS1.I1.C12437	MC20.MG37.AS1.I1.C1518				MC20.MG36.AS1.I1.C10618
MC20.MG16.AS1.I1.C7632	MC20.MG17.AS1.I1.C2827	MC20.MG18.AS1.I1.C9071				MC20.MG20.AS1.I1.C10860				MC20.MG5.AS1.I9.R3504		MC20.MG7.AS1.I1.C2183	MC20.MG8.AS1.I6.R14065	MC20.MG21.AS1.I19.R13506							MC20.MG31.AS1.I1.C11404	MC20.MG30.AS1.I1.C11180			MC20.MG22.AS1.I1.C12867	MC20.MG23.AS1.I1.C1031	MC20.MG24.AS1.I1.C10881	MC20.MG25.AS1.I1.C11602			MC20.MG28.AS1.I1.C12474	MC20.MG37.AS1.I1.C1519				MC20.MG36.AS1.I1.C10622
MC20.MG16.AS1.I1.C7633	MC20.MG17.AS1.I1.C3776	MC20.MG18.AS1.I1.C9830				MC20.MG20.AS1.I1.C10868				MC20.MG5.AS1.I9.R3505		MC20.MG7.AS1.I1.C2193	MC20.MG8.AS1.I6.R14201	MC20.MG21.AS1.I19.R14111							MC20.MG31.AS1.I1.C11486	MC20.MG30.AS1.I1.C11219			MC20.MG22.AS1.I1.C12898	MC20.MG23.AS1.I1.C10314	MC20.MG24.AS1.I1.C10920	MC20.MG25.AS1.I1.C11610			MC20.MG28.AS1.I1.C12520	MC20.MG37.AS1.I1.C1555				MC20.MG36.AS1.I1.C10627
MC20.MG16.AS1.I1.C7837	MC20.MG17.AS1.I1.C3900	MC20.MG18.AS1.I1.C9944				MC20.MG20.AS1.I1.C10896				MC20.MG5.AS1.I9.R5811		MC20.MG7.AS1.I1.C2254	MC20.MG8.AS1.I6.R14202	MC20.MG21.AS1.I19.R14139							MC20.MG31.AS1.I1.C1155	MC20.MG30.AS1.I1.C1159			MC20.MG22.AS1.I1.C12917	MC20.MG23.AS1.I1.C1032	MC20.MG24.AS1.I1.C10939	MC20.MG25.AS1.I1.C11619			MC20.MG28.AS1.I1.C12584	MC20.MG37.AS1.I1.C1556				MC20.MG36.AS1.I1.C1072
MC20.MG16.AS1.I1.C7898	MC20.MG17.AS1.I1.C3911	MC20.MG18.AS1.I11.R10165				MC20.MG20.AS1.I1.C10904				MC20.MG5.AS1.I9.R5812		MC20.MG7.AS1.I1.C2420	MC20.MG8.AS1.I6.R14456	MC20.MG21.AS1.I19.R14687							MC20.MG31.AS1.I1.C1156	MC20.MG30.AS1.I1.C1160			MC20.MG22.AS1.I1.C13098	MC20.MG23.AS1.I1.C10344	MC20.MG24.AS1.I1.C10942	MC20.MG25.AS1.I1.C11863			MC20.MG28.AS1.I1.C12625	MC20.MG37.AS1.I1.C1557				MC20.MG36.AS1.I1.C1073
MC20.MG16.AS1.I1.C7900	MC20.MG17.AS1.I1.C3994	MC20.MG18.AS1.I11.R10288				MC20.MG20.AS1.I1.C10907				MC20.MG5.AS1.I9.R5848		MC20.MG7.AS1.I1.C2467	MC20.MG8.AS1.I6.R14795	MC20.MG21.AS1.I19.R14774							MC20.MG31.AS1.I1.C1157	MC20.MG30.AS1.I1.C1161			MC20.MG22.AS1.I1.C13137	MC20.MG23.AS1.I1.C10346	MC20.MG24.AS1.I1.C10974	MC20.MG25.AS1.I1.C11881			MC20.MG28.AS1.I1.C12635	MC20.MG37.AS1.I1.C1689				MC20.MG36.AS1.I1.C10733
MC20.MG16.AS1.I1.C8006	MC20.MG17.AS1.I1.C4105	MC20.MG18.AS1.I11.R10304				MC20.MG20.AS1.I1.C10961				MC20.MG5.AS1.I9.R7740		MC20.MG7.AS1.I1.C2878	MC20.MG8.AS1.I6.R15171	MC20.MG21.AS1.I19.R15256							MC20.MG31.AS1.I1.C11788	MC20.MG30.AS1.I1.C1162			MC20.MG22.AS1.I1.C13153	MC20.MG23.AS1.I1.C10385	MC20.MG24.AS1.I1.C10979	MC20.MG25.AS1.I1.C11886			MC20.MG28.AS1.I1.C12647	MC20.MG37.AS1.I1.C1690				MC20.MG36.AS1.I1.C1074
MC20.MG16.AS1.I1.C8099	MC20.MG17.AS1.I1.C4207	MC20.MG18.AS1.I11.R10452				MC20.MG20.AS1.I1.C10981				MC20.MG5.AS1.I9.R8275		MC20.MG7.AS1.I1.C2949	MC20.MG8.AS1.I6.R16477	MC20.MG21.AS1.I19.R15374							MC20.MG31.AS1.I1.C11789	MC20.MG30.AS1.I1.C11640			MC20.MG22.AS1.I1.C13226	MC20.MG23.AS1.I1.C10387	MC20.MG24.AS1.I1.C10998	MC20.MG25.AS1.I1.C11900			MC20.MG28.AS1.I1.C12721	MC20.MG37.AS1.I1.C1691				MC20.MG36.AS1.I1.C1075
MC20.MG16.AS1.I1.C8337	MC20.MG17.AS1.I1.C4249	MC20.MG18.AS1.I11.R10607				MC20.MG20.AS1.I1.C10995				MC20.MG5.AS1.I9.R8786		MC20.MG7.AS1.I1.C3038	MC20.MG8.AS1.I6.R16478	MC20.MG21.AS1.I19.R15590							MC20.MG31.AS1.I1.C11800	MC20.MG30.AS1.I1.C11738			MC20.MG22.AS1.I1.C13456	MC20.MG23.AS1.I1.C10408	MC20.MG24.AS1.I1.C11021	MC20.MG25.AS1.I1.C11928			MC20.MG28.AS1.I1.C12754	MC20.MG37.AS1.I1.C1777				MC20.MG36.AS1.I1.C1076
MC20.MG16.AS1.I1.C8743	MC20.MG17.AS1.I1.C4472	MC20.MG18.AS1.I11.R1069				MC20.MG20.AS1.I1.C11025				MC20.MG5.AS1.I9.R9926		MC20.MG7.AS1.I1.C3113	MC20.MG8.AS1.I6.R16828	MC20.MG21.AS1.I19.R15962							MC20.MG31.AS1.I1.C11807	MC20.MG30.AS1.I1.C1175			MC20.MG22.AS1.I1.C13972	MC20.MG23.AS1.I1.C1043	MC20.MG24.AS1.I1.C11037	MC20.MG25.AS1.I1.C11945			MC20.MG28.AS1.I1.C12802	MC20.MG37.AS1.I1.C1778				MC20.MG36.AS1.I1.C1077
MC20.MG16.AS1.I1.C8872	MC20.MG17.AS1.I1.C4615	MC20.MG18.AS1.I11.R10753				MC20.MG20.AS1.I1.C11026				MC20.MG5.AS1.I9.R9927		MC20.MG7.AS1.I1.C3119	MC20.MG8.AS1.I6.R16829	MC20.MG21.AS1.I19.R16195							MC20.MG31.AS1.I1.C11847	MC20.MG30.AS1.I1.C1176			MC20.MG22.AS1.I1.C2983	MC20.MG23.AS1.I1.C1044	MC20.MG24.AS1.I1.C1107	MC20.MG25.AS1.I1.C11977			MC20.MG28.AS1.I1.C12819	MC20.MG37.AS1.I1.C1779				MC20.MG36.AS1.I1.C1078
MC20.MG16.AS1.I1.C8941	MC20.MG17.AS1.I1.C4661	MC20.MG18.AS1.I11.R11029				MC20.MG20.AS1.I1.C11040						MC20.MG7.AS1.I1.C3258	MC20.MG8.AS1.I6.R17107	MC20.MG21.AS1.I19.R16238							MC20.MG31.AS1.I1.C11866	MC20.MG30.AS1.I1.C1177			MC20.MG22.AS1.I1.C3816	MC20.MG23.AS1.I1.C1045	MC20.MG24.AS1.I1.C11073	MC20.MG25.AS1.I1.C11978			MC20.MG28.AS1.I1.C13029	MC20.MG37.AS1.I1.C1782				MC20.MG36.AS1.I1.C1079
MC20.MG16.AS1.I1.C9117	MC20.MG17.AS1.I1.C4679	MC20.MG18.AS1.I11.R11082				MC20.MG20.AS1.I1.C11050						MC20.MG7.AS1.I1.C3334	MC20.MG8.AS1.I6.R17108	MC20.MG21.AS1.I19.R16323							MC20.MG31.AS1.I1.C11897	MC20.MG30.AS1.I1.C1178			MC20.MG22.AS1.I1.C3851	MC20.MG23.AS1.I1.C10474	MC20.MG24.AS1.I1.C11074	MC20.MG25.AS1.I1.C12007			MC20.MG28.AS1.I1.C13110	MC20.MG37.AS1.I1.C1818				MC20.MG36.AS1.I1.C1080
MC20.MG16.AS1.I1.C9146	MC20.MG17.AS1.I1.C4793	MC20.MG18.AS1.I11.R11180				MC20.MG20.AS1.I1.C11062						MC20.MG7.AS1.I1.C3474	MC20.MG8.AS1.I6.R17884	MC20.MG21.AS1.I19.R16381							MC20.MG31.AS1.I1.C11914	MC20.MG30.AS1.I1.C1196			MC20.MG22.AS1.I1.C4705	MC20.MG23.AS1.I1.C1053	MC20.MG24.AS1.I1.C1108	MC20.MG25.AS1.I1.C12038			MC20.MG28.AS1.I1.C13131	MC20.MG37.AS1.I1.C1847				MC20.MG36.AS1.I1.C1081
MC20.MG16.AS1.I1.C9284	MC20.MG17.AS1.I1.C4853	MC20.MG18.AS1.I11.R11438				MC20.MG20.AS1.I1.C11097						MC20.MG7.AS1.I1.C3480	MC20.MG8.AS1.I6.R18767	MC20.MG21.AS1.I19.R17062							MC20.MG31.AS1.I1.C1192	MC20.MG30.AS1.I1.C12073			MC20.MG22.AS1.I1.C4719	MC20.MG23.AS1.I1.C10535	MC20.MG24.AS1.I1.C1109	MC20.MG25.AS1.I1.C12139			MC20.MG28.AS1.I1.C13188	MC20.MG37.AS1.I1.C1851				MC20.MG36.AS1.I1.C10826
MC20.MG16.AS1.I1.C9614	MC20.MG17.AS1.I1.C4874	MC20.MG18.AS1.I11.R11790				MC20.MG20.AS1.I1.C11098						MC20.MG7.AS1.I1.C3514	MC20.MG8.AS1.I6.R1887	MC20.MG21.AS1.I19.R1717							MC20.MG31.AS1.I1.C1193	MC20.MG30.AS1.I1.C1210			MC20.MG22.AS1.I1.C4795	MC20.MG23.AS1.I1.C10548	MC20.MG24.AS1.I1.C1110	MC20.MG25.AS1.I1.C12182			MC20.MG28.AS1.I1.C13222	MC20.MG37.AS1.I1.C1892				MC20.MG36.AS1.I1.C10866
MC20.MG16.AS1.I1.C9745	MC20.MG17.AS1.I1.C4922	MC20.MG18.AS1.I11.R11917				MC20.MG20.AS1.I1.C11099						MC20.MG7.AS1.I1.C3567	MC20.MG8.AS1.I6.R19500	MC20.MG21.AS1.I19.R17358							MC20.MG31.AS1.I1.C1194	MC20.MG30.AS1.I1.C1211			MC20.MG22.AS1.I1.C4907	MC20.MG23.AS1.I1.C10549	MC20.MG24.AS1.I1.C11104	MC20.MG25.AS1.I1.C12245			MC20.MG28.AS1.I1.C13248	MC20.MG37.AS1.I1.C1903				MC20.MG36.AS1.I1.C10884
MC20.MG16.AS1.I1.C9760	MC20.MG17.AS1.I1.C5027	MC20.MG18.AS1.I11.R11951				MC20.MG20.AS1.I1.C11100						MC20.MG7.AS1.I1.C3614	MC20.MG8.AS1.I6.R21195	MC20.MG21.AS1.I19.R17810							MC20.MG31.AS1.I1.C1195	MC20.MG30.AS1.I1.C1212			MC20.MG22.AS1.I1.C5092	MC20.MG23.AS1.I1.C1055	MC20.MG24.AS1.I1.C11106	MC20.MG25.AS1.I1.C12269			MC20.MG28.AS1.I1.C13291	MC20.MG37.AS1.I1.C1928				MC20.MG36.AS1.I1.C1094
MC20.MG16.AS1.I1.C9883	MC20.MG17.AS1.I1.C5649	MC20.MG18.AS1.I11.R12162				MC20.MG20.AS1.I1.C11144						MC20.MG7.AS1.I1.C3638	MC20.MG8.AS1.I6.R2262	MC20.MG21.AS1.I19.R18377							MC20.MG31.AS1.I1.C11957	MC20.MG30.AS1.I1.C1213			MC20.MG22.AS1.I1.C5110	MC20.MG23.AS1.I1.C10557	MC20.MG24.AS1.I1.C11115	MC20.MG25.AS1.I1.C12337			MC20.MG28.AS1.I1.C13322	MC20.MG37.AS1.I1.C1931				MC20.MG36.AS1.I1.C1095
MC20.MG16.AS1.I1.C9908	MC20.MG17.AS1.I1.C5803	MC20.MG18.AS1.I11.R12204				MC20.MG20.AS1.I1.C11146						MC20.MG7.AS1.I1.C3876	MC20.MG8.AS1.I6.R3704	MC20.MG21.AS1.I19.R18582							MC20.MG31.AS1.I1.C1196	MC20.MG30.AS1.I1.C1214			MC20.MG22.AS1.I1.C5153	MC20.MG23.AS1.I1.C1056	MC20.MG24.AS1.I1.C11117	MC20.MG25.AS1.I1.C12501			MC20.MG28.AS1.I1.C3464	MC20.MG37.AS1.I1.C1999				MC20.MG36.AS1.I1.C1096
MC20.MG16.AS1.I11.C145	MC20.MG17.AS1.I1.C5872	MC20.MG18.AS1.I11.R12488				MC20.MG20.AS1.I1.C11161						MC20.MG7.AS1.I1.C3937	MC20.MG8.AS1.I6.R3705	MC20.MG21.AS1.I19.R18839							MC20.MG31.AS1.I1.C1197	MC20.MG30.AS1.I1.C1215			MC20.MG22.AS1.I1.C5197	MC20.MG23.AS1.I1.C10562	MC20.MG24.AS1.I1.C11149	MC20.MG25.AS1.I1.C12745			MC20.MG28.AS1.I1.C3465	MC20.MG37.AS1.I1.C2179				MC20.MG36.AS1.I1.C10962
MC20.MG16.AS1.I11.C146	MC20.MG17.AS1.I1.C6081	MC20.MG18.AS1.I11.R12517				MC20.MG20.AS1.I1.C1117						MC20.MG7.AS1.I1.C3951	MC20.MG8.AS1.I6.R6852	MC20.MG21.AS1.I19.R19013							MC20.MG31.AS1.I1.C1198	MC20.MG30.AS1.I1.C1216			MC20.MG22.AS1.I1.C5561	MC20.MG23.AS1.I1.C1057	MC20.MG24.AS1.I1.C11157	MC20.MG25.AS1.I1.C12756			MC20.MG28.AS1.I1.C3466	MC20.MG37.AS1.I1.C2210				MC20.MG36.AS1.I1.C1097
MC20.MG16.AS1.I11.C30	MC20.MG17.AS1.I1.C6088	MC20.MG18.AS1.I11.R12588				MC20.MG20.AS1.I1.C1118						MC20.MG7.AS1.I1.C4275	MC20.MG8.AS1.I6.R73	MC20.MG21.AS1.I19.R19581							MC20.MG31.AS1.I1.C1199	MC20.MG30.AS1.I1.C1217			MC20.MG22.AS1.I1.C5744	MC20.MG23.AS1.I1.C1058	MC20.MG24.AS1.I1.C11178	MC20.MG25.AS1.I1.C12832			MC20.MG28.AS1.I1.C3606	MC20.MG37.AS1.I1.C2211				MC20.MG36.AS1.I1.C10974
MC20.MG16.AS1.I13.C41	MC20.MG17.AS1.I1.C640	MC20.MG18.AS1.I11.R12630				MC20.MG20.AS1.I1.C1119						MC20.MG7.AS1.I1.C4330	MC20.MG8.AS1.I6.R7443	MC20.MG21.AS1.I19.R19743							MC20.MG31.AS1.I1.C1200	MC20.MG30.AS1.I1.C1218			MC20.MG22.AS1.I1.C5746	MC20.MG23.AS1.I1.C1059	MC20.MG24.AS1.I1.C11181	MC20.MG25.AS1.I1.C12862			MC20.MG28.AS1.I1.C3766	MC20.MG37.AS1.I1.C2224				MC20.MG36.AS1.I1.C1098
MC20.MG16.AS1.I13.C42	MC20.MG17.AS1.I1.C6956	MC20.MG18.AS1.I11.R12927				MC20.MG20.AS1.I1.C1120						MC20.MG7.AS1.I1.C4442	MC20.MG8.AS1.I6.R817	MC20.MG21.AS1.I19.R19757							MC20.MG31.AS1.I1.C1201	MC20.MG30.AS1.I1.C1219			MC20.MG22.AS1.I1.C5774	MC20.MG23.AS1.I1.C10597	MC20.MG24.AS1.I1.C11188	MC20.MG25.AS1.I1.C12906			MC20.MG28.AS1.I1.C3929	MC20.MG37.AS1.I1.C2296				MC20.MG36.AS1.I1.C1099
MC20.MG16.AS1.I14.R10091	MC20.MG17.AS1.I1.C7013	MC20.MG18.AS1.I11.R12991				MC20.MG20.AS1.I1.C11228						MC20.MG7.AS1.I1.C4461	MC20.MG8.AS1.I6.R818	MC20.MG21.AS1.I19.R20132							MC20.MG31.AS1.I1.C1202	MC20.MG30.AS1.I1.C1220			MC20.MG22.AS1.I1.C5794	MC20.MG23.AS1.I1.C1060	MC20.MG24.AS1.I1.C11192	MC20.MG25.AS1.I1.C13002			MC20.MG28.AS1.I1.C4156	MC20.MG37.AS1.I1.C2298				MC20.MG36.AS1.I1.C1100
MC20.MG16.AS1.I14.R10392	MC20.MG17.AS1.I1.C7044	MC20.MG18.AS1.I11.R13220				MC20.MG20.AS1.I1.C11233						MC20.MG7.AS1.I1.C4556	MC20.MG8.AS1.I6.R9318	MC20.MG21.AS1.I19.R20345							MC20.MG31.AS1.I1.C12042	MC20.MG30.AS1.I1.C1221			MC20.MG22.AS1.I1.C5857	MC20.MG23.AS1.I1.C10637	MC20.MG24.AS1.I1.C11194	MC20.MG25.AS1.I1.C13061			MC20.MG28.AS1.I1.C4301	MC20.MG37.AS1.I1.C2369				MC20.MG36.AS1.I1.C1101
MC20.MG16.AS1.I14.R10683	MC20.MG17.AS1.I1.C707	MC20.MG18.AS1.I11.R13526				MC20.MG20.AS1.I1.C11251						MC20.MG7.AS1.I1.C4564	MC20.MG8.AS1.I6.R9406	MC20.MG21.AS1.I19.R2047							MC20.MG31.AS1.I1.C12056	MC20.MG30.AS1.I1.C1222			MC20.MG22.AS1.I1.C5902	MC20.MG23.AS1.I1.C10641	MC20.MG24.AS1.I1.C11203	MC20.MG25.AS1.I1.C13102			MC20.MG28.AS1.I1.C4383	MC20.MG37.AS1.I1.C2416				MC20.MG36.AS1.I1.C11017
MC20.MG16.AS1.I14.R10752	MC20.MG17.AS1.I1.C7307	MC20.MG18.AS1.I11.R13535				MC20.MG20.AS1.I1.C11252						MC20.MG7.AS1.I1.C4627	MC20.MG8.AS1.I6.R9407	MC20.MG21.AS1.I19.R20574							MC20.MG31.AS1.I1.C12063	MC20.MG30.AS1.I1.C1223			MC20.MG22.AS1.I1.C5903	MC20.MG23.AS1.I1.C10678	MC20.MG24.AS1.I1.C11210	MC20.MG25.AS1.I1.C13145			MC20.MG28.AS1.I1.C4434	MC20.MG37.AS1.I1.C2449				MC20.MG36.AS1.I1.C1102
MC20.MG16.AS1.I14.R11052	MC20.MG17.AS1.I1.C7727	MC20.MG18.AS1.I11.R13687				MC20.MG20.AS1.I1.C11275						MC20.MG7.AS1.I1.C4653	MC20.MG8.AS1.I6.R9943	MC20.MG21.AS1.I19.R2086							MC20.MG31.AS1.I1.C12101	MC20.MG30.AS1.I1.C1224			MC20.MG22.AS1.I1.C6044	MC20.MG23.AS1.I1.C10688	MC20.MG24.AS1.I1.C11213	MC20.MG25.AS1.I1.C13149			MC20.MG28.AS1.I1.C4458	MC20.MG37.AS1.I1.C2470				MC20.MG36.AS1.I1.C1103
MC20.MG16.AS1.I14.R11225	MC20.MG17.AS1.I1.C8581	MC20.MG18.AS1.I11.R13739				MC20.MG20.AS1.I1.C11278						MC20.MG7.AS1.I1.C4701		MC20.MG21.AS1.I19.R21277							MC20.MG31.AS1.I1.C12132	MC20.MG30.AS1.I1.C12243			MC20.MG22.AS1.I1.C6068	MC20.MG23.AS1.I1.C1069	MC20.MG24.AS1.I1.C11238	MC20.MG25.AS1.I1.C13183			MC20.MG28.AS1.I1.C4591	MC20.MG37.AS1.I1.C2565				MC20.MG36.AS1.I1.C1104
MC20.MG16.AS1.I14.R11460	MC20.MG17.AS1.I1.C8703	MC20.MG18.AS1.I11.R13948				MC20.MG20.AS1.I1.C11287						MC20.MG7.AS1.I1.C4735		MC20.MG21.AS1.I19.R21467							MC20.MG31.AS1.I1.C12187	MC20.MG30.AS1.I1.C1225			MC20.MG22.AS1.I1.C6109	MC20.MG23.AS1.I1.C1070	MC20.MG24.AS1.I1.C11239	MC20.MG25.AS1.I1.C13184			MC20.MG28.AS1.I1.C4688	MC20.MG37.AS1.I1.C2584				MC20.MG36.AS1.I1.C1105
MC20.MG16.AS1.I14.R11500	MC20.MG17.AS1.I1.C8951	MC20.MG18.AS1.I11.R13968				MC20.MG20.AS1.I1.C11330						MC20.MG7.AS1.I1.C4786		MC20.MG21.AS1.I19.R22250							MC20.MG31.AS1.I1.C1223	MC20.MG30.AS1.I1.C1226			MC20.MG22.AS1.I1.C6427	MC20.MG23.AS1.I1.C10718	MC20.MG24.AS1.I1.C11263	MC20.MG25.AS1.I1.C13249			MC20.MG28.AS1.I1.C4727	MC20.MG37.AS1.I1.C2605				MC20.MG36.AS1.I1.C1107
MC20.MG16.AS1.I14.R11590	MC20.MG17.AS1.I1.C9408	MC20.MG18.AS1.I11.R14153				MC20.MG20.AS1.I1.C11365						MC20.MG7.AS1.I1.C4991		MC20.MG21.AS1.I19.R22735							MC20.MG31.AS1.I1.C1224	MC20.MG30.AS1.I1.C1227			MC20.MG22.AS1.I1.C6495	MC20.MG23.AS1.I1.C10724	MC20.MG24.AS1.I1.C11309	MC20.MG25.AS1.I1.C13299			MC20.MG28.AS1.I1.C4735	MC20.MG37.AS1.I1.C2680				MC20.MG36.AS1.I1.C1108
MC20.MG16.AS1.I14.R11928	MC20.MG17.AS1.I1.C9618	MC20.MG18.AS1.I11.R14269				MC20.MG20.AS1.I1.C11368						MC20.MG7.AS1.I1.C5146		MC20.MG21.AS1.I19.R22810							MC20.MG31.AS1.I1.C12240	MC20.MG30.AS1.I1.C1228			MC20.MG22.AS1.I1.C6575	MC20.MG23.AS1.I1.C10744	MC20.MG24.AS1.I1.C11314	MC20.MG25.AS1.I1.C1738			MC20.MG28.AS1.I1.C4861	MC20.MG37.AS1.I1.C2738				MC20.MG36.AS1.I1.C1109
MC20.MG16.AS1.I14.R1214	MC20.MG17.AS1.I1.C9621	MC20.MG18.AS1.I11.R14528				MC20.MG20.AS1.I1.C11386						MC20.MG7.AS1.I1.C5167		MC20.MG21.AS1.I19.R23053							MC20.MG31.AS1.I1.C1225	MC20.MG30.AS1.I1.C1229			MC20.MG22.AS1.I1.C6602	MC20.MG23.AS1.I1.C10785	MC20.MG24.AS1.I1.C11324	MC20.MG25.AS1.I1.C1760			MC20.MG28.AS1.I1.C4989	MC20.MG37.AS1.I1.C2742				MC20.MG36.AS1.I1.C1110
MC20.MG16.AS1.I14.R12852	MC20.MG17.AS1.I1.C9803	MC20.MG18.AS1.I11.R14640				MC20.MG20.AS1.I1.C11397						MC20.MG7.AS1.I1.C5288		MC20.MG21.AS1.I19.R23122							MC20.MG31.AS1.I1.C1226	MC20.MG30.AS1.I1.C1230			MC20.MG22.AS1.I1.C6731	MC20.MG23.AS1.I1.C10805	MC20.MG24.AS1.I1.C11347	MC20.MG25.AS1.I1.C2079			MC20.MG28.AS1.I1.C5072	MC20.MG37.AS1.I1.C2854				MC20.MG36.AS1.I1.C11102
MC20.MG16.AS1.I14.R12987	MC20.MG17.AS1.I1.C9848	MC20.MG18.AS1.I11.R1474				MC20.MG20.AS1.I1.C11420						MC20.MG7.AS1.I1.C5500		MC20.MG21.AS1.I19.R23211							MC20.MG31.AS1.I1.C12268	MC20.MG30.AS1.I1.C1231			MC20.MG22.AS1.I1.C6781	MC20.MG23.AS1.I1.C10819	MC20.MG24.AS1.I1.C11365	MC20.MG25.AS1.I1.C2181			MC20.MG28.AS1.I1.C5371	MC20.MG37.AS1.I1.C2896				MC20.MG36.AS1.I1.C11119
MC20.MG16.AS1.I14.R13154	MC20.MG17.AS1.I11.C355	MC20.MG18.AS1.I11.R14827				MC20.MG20.AS1.I1.C11461						MC20.MG7.AS1.I1.C5593		MC20.MG21.AS1.I19.R23284							MC20.MG31.AS1.I1.C1227	MC20.MG30.AS1.I1.C1232			MC20.MG22.AS1.I1.C6883	MC20.MG23.AS1.I1.C10820	MC20.MG24.AS1.I1.C11376	MC20.MG25.AS1.I1.C2337			MC20.MG28.AS1.I1.C5387	MC20.MG37.AS1.I1.C2963				MC20.MG36.AS1.I1.C11185
MC20.MG16.AS1.I14.R13537	MC20.MG17.AS1.I14.R12120	MC20.MG18.AS1.I11.R14844				MC20.MG20.AS1.I1.C11462						MC20.MG7.AS1.I1.C5629		MC20.MG21.AS1.I19.R23984							MC20.MG31.AS1.I1.C1228	MC20.MG30.AS1.I1.C12338			MC20.MG22.AS1.I1.C6895	MC20.MG23.AS1.I1.C1083	MC20.MG24.AS1.I1.C11399	MC20.MG25.AS1.I1.C2661			MC20.MG28.AS1.I1.C5413	MC20.MG37.AS1.I1.C2968				MC20.MG36.AS1.I1.C1124
MC20.MG16.AS1.I14.R13640	MC20.MG17.AS1.I14.R12283	MC20.MG18.AS1.I11.R15121				MC20.MG20.AS1.I1.C11497						MC20.MG7.AS1.I1.C5683		MC20.MG21.AS1.I19.R24144							MC20.MG31.AS1.I1.C12353	MC20.MG30.AS1.I1.C12394			MC20.MG22.AS1.I1.C6910	MC20.MG23.AS1.I1.C1084	MC20.MG24.AS1.I1.C11411	MC20.MG25.AS1.I1.C2780			MC20.MG28.AS1.I1.C5473	MC20.MG37.AS1.I1.C2982				MC20.MG36.AS1.I1.C1125
MC20.MG16.AS1.I14.R13658	MC20.MG17.AS1.I14.R1255	MC20.MG18.AS1.I11.R15649				MC20.MG20.AS1.I1.C11566						MC20.MG7.AS1.I1.C5699		MC20.MG21.AS1.I19.R24387							MC20.MG31.AS1.I1.C12384	MC20.MG30.AS1.I1.C1249			MC20.MG22.AS1.I1.C6939	MC20.MG23.AS1.I1.C1085	MC20.MG24.AS1.I1.C11419	MC20.MG25.AS1.I1.C2871			MC20.MG28.AS1.I1.C5481	MC20.MG37.AS1.I1.C3047				MC20.MG36.AS1.I1.C1126
MC20.MG16.AS1.I14.R14108	MC20.MG17.AS1.I14.R14456	MC20.MG18.AS1.I11.R15744				MC20.MG20.AS1.I1.C11706						MC20.MG7.AS1.I1.C5806		MC20.MG21.AS1.I19.R24667							MC20.MG31.AS1.I1.C12447	MC20.MG30.AS1.I1.C1250			MC20.MG22.AS1.I1.C7255	MC20.MG23.AS1.I1.C1086	MC20.MG24.AS1.I1.C11474	MC20.MG25.AS1.I1.C3082			MC20.MG28.AS1.I1.C5492	MC20.MG37.AS1.I1.C3107				MC20.MG36.AS1.I1.C1129
MC20.MG16.AS1.I14.R14118	MC20.MG17.AS1.I14.R14617	MC20.MG18.AS1.I11.R15833				MC20.MG20.AS1.I1.C11707						MC20.MG7.AS1.I1.C5811		MC20.MG21.AS1.I19.R2492							MC20.MG31.AS1.I1.C12454	MC20.MG30.AS1.I1.C1251			MC20.MG22.AS1.I1.C7283	MC20.MG23.AS1.I1.C10867	MC20.MG24.AS1.I1.C11520	MC20.MG25.AS1.I1.C3143			MC20.MG28.AS1.I1.C5753	MC20.MG37.AS1.I1.C3130				MC20.MG36.AS1.I1.C1132
MC20.MG16.AS1.I14.R14315	MC20.MG17.AS1.I14.R15256	MC20.MG18.AS1.I11.R15917				MC20.MG20.AS1.I1.C11710						MC20.MG7.AS1.I1.C5857		MC20.MG21.AS1.I19.R251							MC20.MG31.AS1.I1.C12478	MC20.MG30.AS1.I1.C1252			MC20.MG22.AS1.I1.C7348	MC20.MG23.AS1.I1.C1087	MC20.MG24.AS1.I1.C11552	MC20.MG25.AS1.I1.C3303			MC20.MG28.AS1.I1.C5770	MC20.MG37.AS1.I1.C3133				MC20.MG36.AS1.I1.C1133
MC20.MG16.AS1.I14.R1442	MC20.MG17.AS1.I14.R17030	MC20.MG18.AS1.I11.R16046				MC20.MG20.AS1.I1.C11719						MC20.MG7.AS1.I1.C5868		MC20.MG21.AS1.I19.R25127							MC20.MG31.AS1.I1.C12502	MC20.MG30.AS1.I1.C1253			MC20.MG22.AS1.I1.C7366	MC20.MG23.AS1.I1.C10875	MC20.MG24.AS1.I1.C11556	MC20.MG25.AS1.I1.C3402			MC20.MG28.AS1.I1.C5779	MC20.MG37.AS1.I1.C3157				MC20.MG36.AS1.I1.C1134
MC20.MG16.AS1.I14.R14631	MC20.MG17.AS1.I14.R17898	MC20.MG18.AS1.I11.R16107				MC20.MG20.AS1.I1.C11723						MC20.MG7.AS1.I1.C5973		MC20.MG21.AS1.I19.R25525							MC20.MG31.AS1.I1.C12531	MC20.MG30.AS1.I1.C1254			MC20.MG22.AS1.I1.C7434	MC20.MG23.AS1.I1.C1088	MC20.MG24.AS1.I1.C11568	MC20.MG25.AS1.I1.C3407			MC20.MG28.AS1.I1.C5844	MC20.MG37.AS1.I1.C3193				MC20.MG36.AS1.I1.C1135
MC20.MG16.AS1.I14.R14651	MC20.MG17.AS1.I14.R19252	MC20.MG18.AS1.I11.R16125				MC20.MG20.AS1.I1.C11736						MC20.MG7.AS1.I1.C6043		MC20.MG21.AS1.I19.R25585							MC20.MG31.AS1.I1.C12547	MC20.MG30.AS1.I1.C1255			MC20.MG22.AS1.I1.C7448	MC20.MG23.AS1.I1.C10904	MC20.MG24.AS1.I1.C11597	MC20.MG25.AS1.I1.C3429			MC20.MG28.AS1.I1.C5942	MC20.MG37.AS1.I1.C3213				MC20.MG36.AS1.I1.C1136
MC20.MG16.AS1.I14.R14662	MC20.MG17.AS1.I14.R20208	MC20.MG18.AS1.I11.R16256				MC20.MG20.AS1.I1.C11761						MC20.MG7.AS1.I1.C6083		MC20.MG21.AS1.I19.R25843							MC20.MG31.AS1.I1.C12554	MC20.MG30.AS1.I1.C1256			MC20.MG22.AS1.I1.C7502	MC20.MG23.AS1.I1.C1092	MC20.MG24.AS1.I1.C11616	MC20.MG25.AS1.I1.C3464			MC20.MG28.AS1.I1.C5985	MC20.MG37.AS1.I1.C3217				MC20.MG36.AS1.I1.C1137
MC20.MG16.AS1.I14.R14802	MC20.MG17.AS1.I14.R24737	MC20.MG18.AS1.I11.R16275				MC20.MG20.AS1.I1.C11807						MC20.MG7.AS1.I1.C6115		MC20.MG21.AS1.I19.R26033							MC20.MG31.AS1.I1.C12668	MC20.MG30.AS1.I1.C1257			MC20.MG22.AS1.I1.C7530	MC20.MG23.AS1.I1.C1093	MC20.MG24.AS1.I1.C11628	MC20.MG25.AS1.I1.C3499			MC20.MG28.AS1.I1.C6124	MC20.MG37.AS1.I1.C3284				MC20.MG36.AS1.I1.C1138
MC20.MG16.AS1.I14.R14899	MC20.MG17.AS1.I14.R25337	MC20.MG18.AS1.I11.R16410				MC20.MG20.AS1.I1.C11830						MC20.MG7.AS1.I1.C6127		MC20.MG21.AS1.I19.R26186							MC20.MG31.AS1.I1.C12700	MC20.MG30.AS1.I1.C12575			MC20.MG22.AS1.I1.C7848	MC20.MG23.AS1.I1.C1094	MC20.MG24.AS1.I1.C11631	MC20.MG25.AS1.I1.C3627			MC20.MG28.AS1.I1.C6159	MC20.MG37.AS1.I1.C3285				MC20.MG36.AS1.I1.C11443
MC20.MG16.AS1.I14.R15257	MC20.MG17.AS1.I14.R25676	MC20.MG18.AS1.I11.R16576				MC20.MG20.AS1.I1.C11831						MC20.MG7.AS1.I1.C6139		MC20.MG21.AS1.I19.R27216							MC20.MG31.AS1.I1.C12711	MC20.MG30.AS1.I1.C1258			MC20.MG22.AS1.I1.C7931	MC20.MG23.AS1.I1.C10960	MC20.MG24.AS1.I1.C11635	MC20.MG25.AS1.I1.C3721			MC20.MG28.AS1.I1.C6190	MC20.MG37.AS1.I1.C3309				MC20.MG36.AS1.I1.C11453
MC20.MG16.AS1.I14.R15344	MC20.MG17.AS1.I14.R25843	MC20.MG18.AS1.I11.R16714				MC20.MG20.AS1.I1.C11853						MC20.MG7.AS1.I1.C6225		MC20.MG21.AS1.I19.R27582							MC20.MG31.AS1.I1.C12780	MC20.MG30.AS1.I1.C1259			MC20.MG22.AS1.I1.C8002	MC20.MG23.AS1.I1.C10974	MC20.MG24.AS1.I1.C11731	MC20.MG25.AS1.I1.C3870			MC20.MG28.AS1.I1.C6191	MC20.MG37.AS1.I1.C3357				MC20.MG36.AS1.I1.C11460
MC20.MG16.AS1.I14.R15349	MC20.MG17.AS1.I14.R26116	MC20.MG18.AS1.I11.R16770				MC20.MG20.AS1.I1.C11856						MC20.MG7.AS1.I1.C6297		MC20.MG21.AS1.I19.R27645							MC20.MG31.AS1.I1.C12854	MC20.MG30.AS1.I1.C12598			MC20.MG22.AS1.I1.C8159	MC20.MG23.AS1.I1.C10995	MC20.MG24.AS1.I1.C11747	MC20.MG25.AS1.I1.C3968			MC20.MG28.AS1.I1.C6243	MC20.MG37.AS1.I1.C3368				MC20.MG36.AS1.I1.C11523
MC20.MG16.AS1.I14.R15439	MC20.MG17.AS1.I14.R26678	MC20.MG18.AS1.I11.R16808				MC20.MG20.AS1.I1.C11858						MC20.MG7.AS1.I1.C6440		MC20.MG21.AS1.I19.R27821							MC20.MG31.AS1.I1.C12868	MC20.MG30.AS1.I1.C1260			MC20.MG22.AS1.I1.C8211	MC20.MG23.AS1.I1.C11006	MC20.MG24.AS1.I1.C11748	MC20.MG25.AS1.I1.C4053			MC20.MG28.AS1.I1.C6251	MC20.MG37.AS1.I1.C3450				MC20.MG36.AS1.I1.C1154
MC20.MG16.AS1.I14.R15879	MC20.MG17.AS1.I14.R30138	MC20.MG18.AS1.I11.R16811				MC20.MG20.AS1.I1.C11863						MC20.MG7.AS1.I1.C6495		MC20.MG21.AS1.I19.R27836							MC20.MG31.AS1.I1.C13069	MC20.MG30.AS1.I1.C1261			MC20.MG22.AS1.I1.C8236	MC20.MG23.AS1.I1.C11016	MC20.MG24.AS1.I1.C11751	MC20.MG25.AS1.I1.C4146			MC20.MG28.AS1.I1.C6419	MC20.MG37.AS1.I1.C3478				MC20.MG36.AS1.I1.C1155
MC20.MG16.AS1.I14.R15986	MC20.MG17.AS1.I14.R30853	MC20.MG18.AS1.I11.R16873				MC20.MG20.AS1.I1.C11905						MC20.MG7.AS1.I1.C6625		MC20.MG21.AS1.I19.R28323							MC20.MG31.AS1.I1.C13091	MC20.MG30.AS1.I1.C1278			MC20.MG22.AS1.I1.C8338	MC20.MG23.AS1.I1.C11128	MC20.MG24.AS1.I1.C11755	MC20.MG25.AS1.I1.C4157			MC20.MG28.AS1.I1.C6477	MC20.MG37.AS1.I1.C3484				MC20.MG36.AS1.I1.C1157
MC20.MG16.AS1.I14.R16076	MC20.MG17.AS1.I14.R31083	MC20.MG18.AS1.I11.R1697				MC20.MG20.AS1.I1.C11911						MC20.MG7.AS1.I1.C6629		MC20.MG21.AS1.I19.R28629							MC20.MG31.AS1.I1.C13094	MC20.MG30.AS1.I1.C1279			MC20.MG22.AS1.I1.C8471	MC20.MG23.AS1.I1.C11140	MC20.MG24.AS1.I1.C11756	MC20.MG25.AS1.I1.C4196			MC20.MG28.AS1.I1.C6488	MC20.MG37.AS1.I1.C3549				MC20.MG36.AS1.I1.C1158
MC20.MG16.AS1.I14.R16238	MC20.MG17.AS1.I14.R32060	MC20.MG18.AS1.I11.R17111				MC20.MG20.AS1.I1.C11944						MC20.MG7.AS1.I1.C6697		MC20.MG21.AS1.I19.R28706							MC20.MG31.AS1.I1.C13114	MC20.MG30.AS1.I1.C1280			MC20.MG22.AS1.I1.C8480	MC20.MG23.AS1.I1.C1123	MC20.MG24.AS1.I1.C11783	MC20.MG25.AS1.I1.C4218			MC20.MG28.AS1.I1.C6516	MC20.MG37.AS1.I1.C3585				MC20.MG36.AS1.I1.C1159
MC20.MG16.AS1.I14.R16248	MC20.MG17.AS1.I14.R32459	MC20.MG18.AS1.I11.R1716				MC20.MG20.AS1.I1.C11945						MC20.MG7.AS1.I1.C6750		MC20.MG21.AS1.I19.R28751							MC20.MG31.AS1.I1.C13119	MC20.MG30.AS1.I1.C1281			MC20.MG22.AS1.I1.C8495	MC20.MG23.AS1.I1.C1124	MC20.MG24.AS1.I1.C11868	MC20.MG25.AS1.I1.C4270			MC20.MG28.AS1.I1.C6524	MC20.MG37.AS1.I1.C3588				MC20.MG36.AS1.I1.C1160
MC20.MG16.AS1.I14.R16455	MC20.MG17.AS1.I14.R33569	MC20.MG18.AS1.I11.R17218				MC20.MG20.AS1.I1.C11947						MC20.MG7.AS1.I1.C6763		MC20.MG21.AS1.I19.R28856							MC20.MG31.AS1.I1.C13143	MC20.MG30.AS1.I1.C1283			MC20.MG22.AS1.I1.C8588	MC20.MG23.AS1.I1.C1125	MC20.MG24.AS1.I1.C11926	MC20.MG25.AS1.I1.C4403			MC20.MG28.AS1.I1.C6538	MC20.MG37.AS1.I1.C3625				MC20.MG36.AS1.I1.C11606
MC20.MG16.AS1.I14.R16689	MC20.MG17.AS1.I14.R3443	MC20.MG18.AS1.I11.R17761				MC20.MG20.AS1.I1.C11962						MC20.MG7.AS1.I1.C6817		MC20.MG21.AS1.I19.R28979							MC20.MG31.AS1.I1.C13159	MC20.MG30.AS1.I1.C1294			MC20.MG22.AS1.I1.C8669	MC20.MG23.AS1.I1.C1126	MC20.MG24.AS1.I1.C11931	MC20.MG25.AS1.I1.C4424			MC20.MG28.AS1.I1.C6632	MC20.MG37.AS1.I1.C3726				MC20.MG36.AS1.I1.C1161
MC20.MG16.AS1.I14.R16692	MC20.MG17.AS1.I14.R34768	MC20.MG18.AS1.I11.R17878				MC20.MG20.AS1.I1.C11992						MC20.MG7.AS1.I1.C6883		MC20.MG21.AS1.I19.R29081							MC20.MG31.AS1.I1.C13190	MC20.MG30.AS1.I1.C1295			MC20.MG22.AS1.I1.C8770	MC20.MG23.AS1.I1.C1138	MC20.MG24.AS1.I1.C11942	MC20.MG25.AS1.I1.C4520			MC20.MG28.AS1.I1.C6673	MC20.MG37.AS1.I1.C3765				MC20.MG36.AS1.I1.C11612
MC20.MG16.AS1.I14.R16912	MC20.MG17.AS1.I14.R35081	MC20.MG18.AS1.I11.R17992				MC20.MG20.AS1.I1.C11993						MC20.MG7.AS1.I1.C6906		MC20.MG21.AS1.I19.R29088							MC20.MG31.AS1.I1.C13195	MC20.MG30.AS1.I1.C1296			MC20.MG22.AS1.I1.C8802	MC20.MG23.AS1.I1.C1139	MC20.MG24.AS1.I1.C11943	MC20.MG25.AS1.I1.C4614			MC20.MG28.AS1.I1.C6675	MC20.MG37.AS1.I1.C3815				MC20.MG36.AS1.I1.C1162
MC20.MG16.AS1.I14.R17147	MC20.MG17.AS1.I14.R37001	MC20.MG18.AS1.I11.R18011				MC20.MG20.AS1.I1.C12005						MC20.MG7.AS1.I1.C7106		MC20.MG21.AS1.I19.R29588							MC20.MG31.AS1.I1.C13243	MC20.MG30.AS1.I1.C1297			MC20.MG22.AS1.I1.C8834	MC20.MG23.AS1.I1.C1140	MC20.MG24.AS1.I1.C11972	MC20.MG25.AS1.I1.C4622			MC20.MG28.AS1.I1.C6718	MC20.MG37.AS1.I1.C3952				MC20.MG36.AS1.I1.C1163
MC20.MG16.AS1.I14.R17162	MC20.MG17.AS1.I14.R37817	MC20.MG18.AS1.I11.R18796				MC20.MG20.AS1.I1.C12019						MC20.MG7.AS1.I1.C7246		MC20.MG21.AS1.I19.R29841							MC20.MG31.AS1.I1.C13359	MC20.MG30.AS1.I1.C1300			MC20.MG22.AS1.I1.C8864	MC20.MG23.AS1.I1.C1150	MC20.MG24.AS1.I1.C11984	MC20.MG25.AS1.I1.C4745			MC20.MG28.AS1.I1.C6956	MC20.MG37.AS1.I1.C3982				MC20.MG36.AS1.I1.C1164
MC20.MG16.AS1.I14.R17210	MC20.MG17.AS1.I14.R3993	MC20.MG18.AS1.I11.R18859				MC20.MG20.AS1.I1.C12038						MC20.MG7.AS1.I1.C7316		MC20.MG21.AS1.I19.R29933							MC20.MG31.AS1.I1.C13368	MC20.MG30.AS1.I1.C1301			MC20.MG22.AS1.I1.C8939	MC20.MG23.AS1.I1.C1151	MC20.MG24.AS1.I1.C12004	MC20.MG25.AS1.I1.C4798			MC20.MG28.AS1.I1.C7158	MC20.MG37.AS1.I1.C3984				MC20.MG36.AS1.I1.C1165
MC20.MG16.AS1.I14.R17441	MC20.MG17.AS1.I14.R42617	MC20.MG18.AS1.I11.R1890				MC20.MG20.AS1.I1.C12051						MC20.MG7.AS1.I1.C7421		MC20.MG21.AS1.I19.R30055							MC20.MG31.AS1.I1.C13384	MC20.MG30.AS1.I1.C1302			MC20.MG22.AS1.I1.C8989	MC20.MG23.AS1.I1.C1152	MC20.MG24.AS1.I1.C12009	MC20.MG25.AS1.I1.C4859			MC20.MG28.AS1.I1.C7346	MC20.MG37.AS1.I1.C4096				MC20.MG36.AS1.I1.C1166
MC20.MG16.AS1.I14.R17529	MC20.MG17.AS1.I14.R43954	MC20.MG18.AS1.I11.R19086				MC20.MG20.AS1.I1.C12085						MC20.MG7.AS1.I1.C7603		MC20.MG21.AS1.I19.R30140							MC20.MG31.AS1.I1.C1341	MC20.MG30.AS1.I1.C1303			MC20.MG22.AS1.I1.C9152	MC20.MG23.AS1.I1.C1160	MC20.MG24.AS1.I1.C1203	MC20.MG25.AS1.I1.C5180			MC20.MG28.AS1.I1.C7475	MC20.MG37.AS1.I1.C4130				MC20.MG36.AS1.I1.C11660
MC20.MG16.AS1.I14.R17673	MC20.MG17.AS1.I14.R44105	MC20.MG18.AS1.I11.R19222				MC20.MG20.AS1.I1.C12158						MC20.MG7.AS1.I1.C7650		MC20.MG21.AS1.I19.R30223							MC20.MG31.AS1.I1.C1342	MC20.MG30.AS1.I1.C1304			MC20.MG22.AS1.I1.C9316	MC20.MG23.AS1.I1.C1161	MC20.MG24.AS1.I1.C1204	MC20.MG25.AS1.I1.C5187			MC20.MG28.AS1.I1.C7566	MC20.MG37.AS1.I1.C4154				MC20.MG36.AS1.I1.C1167
MC20.MG16.AS1.I14.R17862	MC20.MG17.AS1.I14.R44553	MC20.MG18.AS1.I11.R19321				MC20.MG20.AS1.I1.C12179						MC20.MG7.AS1.I1.C7804		MC20.MG21.AS1.I19.R30703							MC20.MG31.AS1.I1.C1343	MC20.MG30.AS1.I1.C1305			MC20.MG22.AS1.I1.C9327	MC20.MG23.AS1.I1.C1162	MC20.MG24.AS1.I1.C12049	MC20.MG25.AS1.I1.C5307			MC20.MG28.AS1.I1.C7589	MC20.MG37.AS1.I1.C4165				MC20.MG36.AS1.I1.C11742
MC20.MG16.AS1.I14.R18497	MC20.MG17.AS1.I14.R45043	MC20.MG18.AS1.I11.R19462				MC20.MG20.AS1.I1.C12207						MC20.MG7.AS1.I1.C786		MC20.MG21.AS1.I19.R30741							MC20.MG31.AS1.I1.C13435	MC20.MG30.AS1.I1.C1306			MC20.MG22.AS1.I1.C9652	MC20.MG23.AS1.I1.C1163	MC20.MG24.AS1.I1.C1205	MC20.MG25.AS1.I1.C5478			MC20.MG28.AS1.I1.C7622	MC20.MG37.AS1.I1.C4172				MC20.MG36.AS1.I1.C11820
MC20.MG16.AS1.I14.R19506	MC20.MG17.AS1.I14.R45794	MC20.MG18.AS1.I11.R19498				MC20.MG20.AS1.I1.C12255						MC20.MG7.AS1.I1.C7977		MC20.MG21.AS1.I19.R30762							MC20.MG31.AS1.I1.C1344	MC20.MG30.AS1.I1.C1307			MC20.MG22.AS1.I1.C9676	MC20.MG23.AS1.I1.C1170	MC20.MG24.AS1.I1.C1209	MC20.MG25.AS1.I1.C5535			MC20.MG28.AS1.I1.C7632	MC20.MG37.AS1.I1.C4198				MC20.MG36.AS1.I1.C11967
MC20.MG16.AS1.I14.R19523	MC20.MG17.AS1.I14.R46936	MC20.MG18.AS1.I11.R20082				MC20.MG20.AS1.I1.C12263						MC20.MG7.AS1.I1.C8121		MC20.MG21.AS1.I19.R30948							MC20.MG31.AS1.I1.C13442	MC20.MG30.AS1.I1.C1308			MC20.MG22.AS1.I1.C9750	MC20.MG23.AS1.I1.C1171	MC20.MG24.AS1.I1.C12099	MC20.MG25.AS1.I1.C5734			MC20.MG28.AS1.I1.C7873	MC20.MG37.AS1.I1.C4206				MC20.MG36.AS1.I1.C12015
MC20.MG16.AS1.I14.R19927	MC20.MG17.AS1.I14.R7083	MC20.MG18.AS1.I11.R20108				MC20.MG20.AS1.I1.C12281						MC20.MG7.AS1.I1.C8145		MC20.MG21.AS1.I19.R31170							MC20.MG31.AS1.I1.C13448	MC20.MG30.AS1.I1.C1315			MC20.MG22.AS1.I1.C9913	MC20.MG23.AS1.I1.C1172	MC20.MG24.AS1.I1.C1210	MC20.MG25.AS1.I1.C5772			MC20.MG28.AS1.I1.C7945	MC20.MG37.AS1.I1.C4219				MC20.MG36.AS1.I1.C12018
MC20.MG16.AS1.I14.R200	MC20.MG17.AS1.I14.R7686	MC20.MG18.AS1.I11.R20231				MC20.MG20.AS1.I1.C12285						MC20.MG7.AS1.I1.C8355		MC20.MG21.AS1.I19.R31256							MC20.MG31.AS1.I1.C1345	MC20.MG30.AS1.I1.C1316			MC20.MG22.AS1.I1.C9988	MC20.MG23.AS1.I1.C1177	MC20.MG24.AS1.I1.C1211	MC20.MG25.AS1.I1.C5789			MC20.MG28.AS1.I1.C7981	MC20.MG37.AS1.I1.C4247				MC20.MG36.AS1.I1.C12153
MC20.MG16.AS1.I14.R2026	MC20.MG17.AS1.I14.R7980	MC20.MG18.AS1.I11.R20456				MC20.MG20.AS1.I1.C12306						MC20.MG7.AS1.I1.C8452		MC20.MG21.AS1.I19.R31775							MC20.MG31.AS1.I1.C1346	MC20.MG30.AS1.I1.C1317			MC20.MG22.AS1.I18.C127	MC20.MG23.AS1.I1.C1178	MC20.MG24.AS1.I1.C1212	MC20.MG25.AS1.I1.C5817			MC20.MG28.AS1.I1.C8042	MC20.MG37.AS1.I1.C4311				MC20.MG36.AS1.I1.C12362
MC20.MG16.AS1.I14.R20276	MC20.MG17.AS1.I14.R8892	MC20.MG18.AS1.I11.R20457				MC20.MG20.AS1.I1.C12338						MC20.MG7.AS1.I1.C8567		MC20.MG21.AS1.I19.R31959							MC20.MG31.AS1.I1.C13470	MC20.MG30.AS1.I1.C1318			MC20.MG22.AS1.I18.C128	MC20.MG23.AS1.I1.C1179	MC20.MG24.AS1.I1.C1213	MC20.MG25.AS1.I1.C5851			MC20.MG28.AS1.I1.C8145	MC20.MG37.AS1.I1.C4325				MC20.MG36.AS1.I1.C1256
MC20.MG16.AS1.I14.R20637	MC20.MG17.AS1.I2.C103	MC20.MG18.AS1.I11.R20502				MC20.MG20.AS1.I1.C12390						MC20.MG7.AS1.I1.C8571		MC20.MG21.AS1.I19.R32031							MC20.MG31.AS1.I1.C1352	MC20.MG30.AS1.I1.C1319			MC20.MG22.AS1.I18.C171	MC20.MG23.AS1.I1.C1180	MC20.MG24.AS1.I1.C12150	MC20.MG25.AS1.I1.C5862			MC20.MG28.AS1.I1.C8153	MC20.MG37.AS1.I1.C4338				MC20.MG36.AS1.I1.C1257
MC20.MG16.AS1.I14.R20931		MC20.MG18.AS1.I11.R20682				MC20.MG20.AS1.I1.C12433						MC20.MG7.AS1.I1.C8597		MC20.MG21.AS1.I19.R32189							MC20.MG31.AS1.I1.C1353	MC20.MG30.AS1.I1.C1320			MC20.MG22.AS1.I18.C172	MC20.MG23.AS1.I1.C1185	MC20.MG24.AS1.I1.C12154	MC20.MG25.AS1.I1.C5889			MC20.MG28.AS1.I1.C8230	MC20.MG37.AS1.I1.C4470				MC20.MG36.AS1.I1.C1258
MC20.MG16.AS1.I14.R20935		MC20.MG18.AS1.I11.R20795				MC20.MG20.AS1.I1.C12435						MC20.MG7.AS1.I1.C8820		MC20.MG21.AS1.I19.R32252							MC20.MG31.AS1.I1.C1354	MC20.MG30.AS1.I1.C1321			MC20.MG22.AS1.I18.C215	MC20.MG23.AS1.I1.C1186	MC20.MG24.AS1.I1.C12172	MC20.MG25.AS1.I1.C6019			MC20.MG28.AS1.I1.C8248	MC20.MG37.AS1.I1.C4503				MC20.MG36.AS1.I1.C1259
MC20.MG16.AS1.I14.R2128		MC20.MG18.AS1.I11.R20945				MC20.MG20.AS1.I1.C12466						MC20.MG7.AS1.I1.C8848		MC20.MG21.AS1.I19.R3263							MC20.MG31.AS1.I1.C1355	MC20.MG30.AS1.I1.C1322			MC20.MG22.AS1.I18.C216	MC20.MG23.AS1.I1.C1198	MC20.MG24.AS1.I1.C12216	MC20.MG25.AS1.I1.C6036			MC20.MG28.AS1.I1.C8290	MC20.MG37.AS1.I1.C4529				MC20.MG36.AS1.I1.C1260
MC20.MG16.AS1.I14.R21294		MC20.MG18.AS1.I11.R21095				MC20.MG20.AS1.I1.C12488						MC20.MG7.AS1.I1.C9034		MC20.MG21.AS1.I19.R32687							MC20.MG31.AS1.I1.C1356	MC20.MG30.AS1.I1.C1323			MC20.MG22.AS1.I18.C449	MC20.MG23.AS1.I1.C1199	MC20.MG24.AS1.I1.C12220	MC20.MG25.AS1.I1.C6314			MC20.MG28.AS1.I1.C8321	MC20.MG37.AS1.I1.C4530				MC20.MG36.AS1.I1.C1261
MC20.MG16.AS1.I14.R21730		MC20.MG18.AS1.I11.R21414				MC20.MG20.AS1.I1.C12524						MC20.MG7.AS1.I1.C9046		MC20.MG21.AS1.I19.R32941							MC20.MG31.AS1.I1.C1357	MC20.MG30.AS1.I1.C13376			MC20.MG22.AS1.I18.C450	MC20.MG23.AS1.I1.C1200	MC20.MG24.AS1.I1.C12313	MC20.MG25.AS1.I1.C6357			MC20.MG28.AS1.I1.C8327	MC20.MG37.AS1.I1.C4581				MC20.MG36.AS1.I1.C1262
MC20.MG16.AS1.I14.R21783		MC20.MG18.AS1.I11.R21449				MC20.MG20.AS1.I1.C12529						MC20.MG7.AS1.I1.C9146		MC20.MG21.AS1.I19.R3314							MC20.MG31.AS1.I1.C13606	MC20.MG30.AS1.I1.C13402			MC20.MG22.AS1.I18.C473	MC20.MG23.AS1.I1.C1201	MC20.MG24.AS1.I1.C12314	MC20.MG25.AS1.I1.C6393			MC20.MG28.AS1.I1.C8397	MC20.MG37.AS1.I1.C4608				MC20.MG36.AS1.I1.C12627
MC20.MG16.AS1.I14.R22085		MC20.MG18.AS1.I11.R21609				MC20.MG20.AS1.I1.C1255						MC20.MG7.AS1.I1.C9200		MC20.MG21.AS1.I19.R33223							MC20.MG31.AS1.I1.C13638	MC20.MG30.AS1.I1.C13403			MC20.MG22.AS1.I18.C474	MC20.MG23.AS1.I1.C1202	MC20.MG24.AS1.I1.C12353	MC20.MG25.AS1.I1.C6492			MC20.MG28.AS1.I1.C8578	MC20.MG37.AS1.I1.C4626				MC20.MG36.AS1.I1.C1263
MC20.MG16.AS1.I14.R22113		MC20.MG18.AS1.I11.R21720				MC20.MG20.AS1.I1.C1256						MC20.MG7.AS1.I1.C9219		MC20.MG21.AS1.I19.R33228							MC20.MG31.AS1.I1.C13689	MC20.MG30.AS1.I1.C1352			MC20.MG22.AS1.I18.C553	MC20.MG23.AS1.I1.C1203	MC20.MG24.AS1.I1.C12366	MC20.MG25.AS1.I1.C6572			MC20.MG28.AS1.I1.C8615	MC20.MG37.AS1.I1.C4630				MC20.MG36.AS1.I1.C1264
MC20.MG16.AS1.I14.R22406		MC20.MG18.AS1.I11.R21785				MC20.MG20.AS1.I1.C1257						MC20.MG7.AS1.I1.C9234		MC20.MG21.AS1.I19.R33563							MC20.MG31.AS1.I1.C13738	MC20.MG30.AS1.I1.C1353			MC20.MG22.AS1.I18.C554	MC20.MG23.AS1.I1.C1204	MC20.MG24.AS1.I1.C12374	MC20.MG25.AS1.I1.C6873			MC20.MG28.AS1.I1.C8659	MC20.MG37.AS1.I1.C4705				MC20.MG36.AS1.I1.C1265
MC20.MG16.AS1.I14.R22413		MC20.MG18.AS1.I11.R21934				MC20.MG20.AS1.I1.C1258						MC20.MG7.AS1.I1.C9620		MC20.MG21.AS1.I19.R33854							MC20.MG31.AS1.I1.C13816	MC20.MG30.AS1.I1.C1354			MC20.MG22.AS1.I2.C126	MC20.MG23.AS1.I1.C1205	MC20.MG24.AS1.I1.C12380	MC20.MG25.AS1.I1.C6961			MC20.MG28.AS1.I1.C8663	MC20.MG37.AS1.I1.C4727				MC20.MG36.AS1.I1.C1288
MC20.MG16.AS1.I14.R22756		MC20.MG18.AS1.I11.R2238				MC20.MG20.AS1.I1.C12580						MC20.MG7.AS1.I1.C9621		MC20.MG21.AS1.I19.R33963							MC20.MG31.AS1.I1.C1382	MC20.MG30.AS1.I1.C1355			MC20.MG22.AS1.I20.C13	MC20.MG23.AS1.I1.C1215	MC20.MG24.AS1.I1.C12490	MC20.MG25.AS1.I1.C7027			MC20.MG28.AS1.I1.C8724	MC20.MG37.AS1.I1.C4759				MC20.MG36.AS1.I1.C1289
MC20.MG16.AS1.I14.R22789		MC20.MG18.AS1.I11.R22393				MC20.MG20.AS1.I1.C12609						MC20.MG7.AS1.I1.C9658		MC20.MG21.AS1.I19.R34146							MC20.MG31.AS1.I1.C1383	MC20.MG30.AS1.I1.C1356			MC20.MG22.AS1.I20.C14	MC20.MG23.AS1.I1.C1216	MC20.MG24.AS1.I1.C12527	MC20.MG25.AS1.I1.C7037			MC20.MG28.AS1.I1.C8767	MC20.MG37.AS1.I1.C4767				MC20.MG36.AS1.I1.C1290
MC20.MG16.AS1.I14.R23127		MC20.MG18.AS1.I11.R22464				MC20.MG20.AS1.I1.C12630						MC20.MG7.AS1.I1.C9724		MC20.MG21.AS1.I19.R34335							MC20.MG31.AS1.I1.C1384	MC20.MG30.AS1.I1.C1357			MC20.MG22.AS1.I22.R10109	MC20.MG23.AS1.I1.C1228	MC20.MG24.AS1.I1.C12550	MC20.MG25.AS1.I1.C7068			MC20.MG28.AS1.I1.C8776	MC20.MG37.AS1.I1.C4769				MC20.MG36.AS1.I1.C1291
MC20.MG16.AS1.I14.R23154		MC20.MG18.AS1.I11.R22634				MC20.MG20.AS1.I1.C12651						MC20.MG7.AS1.I1.C9740		MC20.MG21.AS1.I19.R34363							MC20.MG31.AS1.I1.C1385	MC20.MG30.AS1.I1.C13650			MC20.MG22.AS1.I22.R10187	MC20.MG23.AS1.I1.C1229	MC20.MG24.AS1.I1.C12564	MC20.MG25.AS1.I1.C7103			MC20.MG28.AS1.I1.C8807	MC20.MG37.AS1.I1.C4771				MC20.MG36.AS1.I1.C12915
MC20.MG16.AS1.I14.R2346		MC20.MG18.AS1.I11.R22754				MC20.MG20.AS1.I1.C12678						MC20.MG7.AS1.I1.C9814		MC20.MG21.AS1.I19.R34608							MC20.MG31.AS1.I1.C1386	MC20.MG30.AS1.I1.C13794			MC20.MG22.AS1.I22.R1040	MC20.MG23.AS1.I1.C1230	MC20.MG24.AS1.I1.C12576	MC20.MG25.AS1.I1.C7136			MC20.MG28.AS1.I1.C8867	MC20.MG37.AS1.I1.C4848				MC20.MG36.AS1.I1.C1292
MC20.MG16.AS1.I14.R23626		MC20.MG18.AS1.I11.R23118				MC20.MG20.AS1.I1.C12700						MC20.MG7.AS1.I1.C9840		MC20.MG21.AS1.I19.R34613							MC20.MG31.AS1.I1.C1387	MC20.MG30.AS1.I1.C1387			MC20.MG22.AS1.I22.R10413	MC20.MG23.AS1.I1.C1231	MC20.MG24.AS1.I1.C12582	MC20.MG25.AS1.I1.C7321			MC20.MG28.AS1.I1.C8905	MC20.MG37.AS1.I1.C4864				MC20.MG36.AS1.I1.C1293
MC20.MG16.AS1.I14.R23860		MC20.MG18.AS1.I11.R23191				MC20.MG20.AS1.I1.C12714						MC20.MG7.AS1.I9.R10042		MC20.MG21.AS1.I19.R35208							MC20.MG31.AS1.I1.C13903	MC20.MG30.AS1.I1.C1388			MC20.MG22.AS1.I22.R1046	MC20.MG23.AS1.I1.C1232	MC20.MG24.AS1.I1.C12585	MC20.MG25.AS1.I1.C7335			MC20.MG28.AS1.I1.C9048	MC20.MG37.AS1.I1.C4892				MC20.MG36.AS1.I1.C1294
MC20.MG16.AS1.I14.R23989		MC20.MG18.AS1.I11.R23192				MC20.MG20.AS1.I1.C12769						MC20.MG7.AS1.I9.R10043		MC20.MG21.AS1.I19.R35287							MC20.MG31.AS1.I1.C13926	MC20.MG30.AS1.I1.C1389			MC20.MG22.AS1.I22.R10523	MC20.MG23.AS1.I1.C1233	MC20.MG24.AS1.I1.C12601	MC20.MG25.AS1.I1.C7344			MC20.MG28.AS1.I1.C9214	MC20.MG37.AS1.I1.C4918				MC20.MG36.AS1.I1.C13064
MC20.MG16.AS1.I14.R24105		MC20.MG18.AS1.I11.R23310				MC20.MG20.AS1.I1.C12783						MC20.MG7.AS1.I9.R10169		MC20.MG21.AS1.I19.R35499							MC20.MG31.AS1.I1.C13941	MC20.MG30.AS1.I1.C1390			MC20.MG22.AS1.I22.R10649	MC20.MG23.AS1.I1.C1236	MC20.MG24.AS1.I1.C12627	MC20.MG25.AS1.I1.C7416			MC20.MG28.AS1.I1.C9279	MC20.MG37.AS1.I1.C4984				MC20.MG36.AS1.I1.C13076
MC20.MG16.AS1.I14.R24145		MC20.MG18.AS1.I11.R23671				MC20.MG20.AS1.I1.C12793						MC20.MG7.AS1.I9.R10194		MC20.MG21.AS1.I19.R35636							MC20.MG31.AS1.I1.C13978	MC20.MG30.AS1.I1.C1391			MC20.MG22.AS1.I22.R10702	MC20.MG23.AS1.I1.C1237	MC20.MG24.AS1.I1.C12633	MC20.MG25.AS1.I1.C7511			MC20.MG28.AS1.I1.C9361	MC20.MG37.AS1.I1.C5011				MC20.MG36.AS1.I1.C13101
MC20.MG16.AS1.I14.R24458		MC20.MG18.AS1.I11.R23807				MC20.MG20.AS1.I1.C12805						MC20.MG7.AS1.I9.R1033		MC20.MG21.AS1.I19.R35800							MC20.MG31.AS1.I1.C14057	MC20.MG30.AS1.I1.C1392			MC20.MG22.AS1.I22.R10870	MC20.MG23.AS1.I1.C1238	MC20.MG24.AS1.I1.C12641	MC20.MG25.AS1.I1.C7546			MC20.MG28.AS1.I1.C9465	MC20.MG37.AS1.I1.C5023				MC20.MG36.AS1.I1.C13273
MC20.MG16.AS1.I14.R2447		MC20.MG18.AS1.I11.R23820				MC20.MG20.AS1.I1.C12834						MC20.MG7.AS1.I9.R1034		MC20.MG21.AS1.I19.R35938							MC20.MG31.AS1.I1.C14068	MC20.MG30.AS1.I1.C1393			MC20.MG22.AS1.I22.R11036	MC20.MG23.AS1.I1.C1239	MC20.MG24.AS1.I1.C12652	MC20.MG25.AS1.I1.C7585			MC20.MG28.AS1.I1.C9497	MC20.MG37.AS1.I1.C5084				MC20.MG36.AS1.I1.C13369
MC20.MG16.AS1.I14.R24476		MC20.MG18.AS1.I11.R23946				MC20.MG20.AS1.I1.C1425						MC20.MG7.AS1.I9.R10415		MC20.MG21.AS1.I19.R35942							MC20.MG31.AS1.I1.C14149	MC20.MG30.AS1.I1.C13996			MC20.MG22.AS1.I22.R11136	MC20.MG23.AS1.I1.C1240	MC20.MG24.AS1.I1.C1266	MC20.MG25.AS1.I1.C7627			MC20.MG28.AS1.I1.C9581	MC20.MG37.AS1.I1.C5186				MC20.MG36.AS1.I1.C1344
MC20.MG16.AS1.I14.R2483		MC20.MG18.AS1.I11.R24263				MC20.MG20.AS1.I1.C1474						MC20.MG7.AS1.I9.R10470		MC20.MG21.AS1.I19.R36186							MC20.MG31.AS1.I1.C14194	MC20.MG30.AS1.I1.C1405			MC20.MG22.AS1.I22.R11188	MC20.MG23.AS1.I1.C1241	MC20.MG24.AS1.I1.C1267	MC20.MG25.AS1.I1.C8071			MC20.MG28.AS1.I1.C9601	MC20.MG37.AS1.I1.C5217				MC20.MG36.AS1.I1.C1345
MC20.MG16.AS1.I14.R24946		MC20.MG18.AS1.I11.R24295				MC20.MG20.AS1.I1.C1475						MC20.MG7.AS1.I9.R10471		MC20.MG21.AS1.I19.R36631							MC20.MG31.AS1.I1.C14367	MC20.MG30.AS1.I1.C14057			MC20.MG22.AS1.I22.R11275	MC20.MG23.AS1.I1.C1260	MC20.MG24.AS1.I1.C12687	MC20.MG25.AS1.I1.C8185			MC20.MG28.AS1.I1.C9795	MC20.MG37.AS1.I1.C5399				MC20.MG36.AS1.I1.C1346
MC20.MG16.AS1.I14.R25082		MC20.MG18.AS1.I11.R24557				MC20.MG20.AS1.I1.C1476						MC20.MG7.AS1.I9.R10544		MC20.MG21.AS1.I19.R36655							MC20.MG31.AS1.I1.C1438	MC20.MG30.AS1.I1.C1406			MC20.MG22.AS1.I22.R11414	MC20.MG23.AS1.I1.C1261	MC20.MG24.AS1.I1.C12717	MC20.MG25.AS1.I1.C8327			MC20.MG28.AS1.I1.C9860	MC20.MG37.AS1.I1.C5423				MC20.MG36.AS1.I1.C1347
MC20.MG16.AS1.I14.R25140		MC20.MG18.AS1.I11.R24568				MC20.MG20.AS1.I1.C1477						MC20.MG7.AS1.I9.R10545		MC20.MG21.AS1.I19.R36933							MC20.MG31.AS1.I1.C1439	MC20.MG30.AS1.I1.C1407			MC20.MG22.AS1.I22.R11621	MC20.MG23.AS1.I1.C1266	MC20.MG24.AS1.I1.C12734	MC20.MG25.AS1.I1.C8400			MC20.MG28.AS1.I1.C9888	MC20.MG37.AS1.I1.C5447				MC20.MG36.AS1.I1.C1348
MC20.MG16.AS1.I14.R25331		MC20.MG18.AS1.I11.R24669				MC20.MG20.AS1.I1.C1478						MC20.MG7.AS1.I9.R10625		MC20.MG21.AS1.I19.R3702							MC20.MG31.AS1.I1.C1440	MC20.MG30.AS1.I1.C1408			MC20.MG22.AS1.I22.R11719	MC20.MG23.AS1.I1.C1267	MC20.MG24.AS1.I1.C12772	MC20.MG25.AS1.I1.C8446			MC20.MG28.AS1.I1.C9993	MC20.MG37.AS1.I1.C5465				MC20.MG36.AS1.I1.C1349
MC20.MG16.AS1.I14.R25509		MC20.MG18.AS1.I11.R24729				MC20.MG20.AS1.I1.C1548						MC20.MG7.AS1.I9.R10626		MC20.MG21.AS1.I19.R37143							MC20.MG31.AS1.I1.C1441	MC20.MG30.AS1.I1.C1409			MC20.MG22.AS1.I22.R11729	MC20.MG23.AS1.I1.C1268	MC20.MG24.AS1.I1.C12794	MC20.MG25.AS1.I1.C8477			MC20.MG28.AS1.I13.C905	MC20.MG37.AS1.I1.C5489				MC20.MG36.AS1.I1.C13496
MC20.MG16.AS1.I14.R25578		MC20.MG18.AS1.I11.R25083				MC20.MG20.AS1.I1.C1549						MC20.MG7.AS1.I9.R10669		MC20.MG21.AS1.I19.R37207							MC20.MG31.AS1.I1.C14475	MC20.MG30.AS1.I1.C1416			MC20.MG22.AS1.I22.R1173	MC20.MG23.AS1.I1.C1270	MC20.MG24.AS1.I1.C12802	MC20.MG25.AS1.I1.C8479			MC20.MG28.AS1.I13.C906	MC20.MG37.AS1.I1.C5497				MC20.MG36.AS1.I1.C1350
MC20.MG16.AS1.I14.R25610		MC20.MG18.AS1.I11.R25222				MC20.MG20.AS1.I1.C1550						MC20.MG7.AS1.I9.R10807		MC20.MG21.AS1.I19.R37265							MC20.MG31.AS1.I1.C14481	MC20.MG30.AS1.I1.C1417			MC20.MG22.AS1.I22.R11824	MC20.MG23.AS1.I1.C1271	MC20.MG24.AS1.I1.C12810	MC20.MG25.AS1.I1.C8517			MC20.MG28.AS1.I17.R10014	MC20.MG37.AS1.I1.C5498				MC20.MG36.AS1.I1.C1351
MC20.MG16.AS1.I14.R25954		MC20.MG18.AS1.I11.R25324				MC20.MG20.AS1.I1.C1693						MC20.MG7.AS1.I9.R10808		MC20.MG21.AS1.I19.R37549							MC20.MG31.AS1.I1.C14484	MC20.MG30.AS1.I1.C1418			MC20.MG22.AS1.I22.R11914	MC20.MG23.AS1.I1.C1272	MC20.MG24.AS1.I1.C12843	MC20.MG25.AS1.I1.C8724			MC20.MG28.AS1.I17.R10075	MC20.MG37.AS1.I1.C5501				MC20.MG36.AS1.I1.C1352
MC20.MG16.AS1.I14.R2604		MC20.MG18.AS1.I11.R25369				MC20.MG20.AS1.I1.C1694						MC20.MG7.AS1.I9.R11091		MC20.MG21.AS1.I19.R37603							MC20.MG31.AS1.I1.C14595	MC20.MG30.AS1.I1.C1419			MC20.MG22.AS1.I22.R11944	MC20.MG23.AS1.I1.C1276	MC20.MG24.AS1.I1.C12848	MC20.MG25.AS1.I1.C8863			MC20.MG28.AS1.I17.R10306	MC20.MG37.AS1.I1.C5518				MC20.MG36.AS1.I1.C1353
MC20.MG16.AS1.I14.R26133		MC20.MG18.AS1.I11.R25404				MC20.MG20.AS1.I1.C1695						MC20.MG7.AS1.I9.R11273		MC20.MG21.AS1.I19.R37791							MC20.MG31.AS1.I1.C14650	MC20.MG30.AS1.I1.C1420			MC20.MG22.AS1.I22.R12073	MC20.MG23.AS1.I1.C1277	MC20.MG24.AS1.I1.C12852	MC20.MG25.AS1.I1.C8905			MC20.MG28.AS1.I17.R1047	MC20.MG37.AS1.I1.C5556				MC20.MG36.AS1.I1.C1354
MC20.MG16.AS1.I14.R26757		MC20.MG18.AS1.I11.R25435				MC20.MG20.AS1.I1.C1701						MC20.MG7.AS1.I9.R1134		MC20.MG21.AS1.I19.R38312							MC20.MG31.AS1.I1.C14734	MC20.MG30.AS1.I1.C1421			MC20.MG22.AS1.I22.R1233	MC20.MG23.AS1.I1.C1278	MC20.MG24.AS1.I1.C12920	MC20.MG25.AS1.I1.C9065			MC20.MG28.AS1.I17.R10735	MC20.MG37.AS1.I1.C5619				MC20.MG36.AS1.I1.C1355
MC20.MG16.AS1.I14.R26851		MC20.MG18.AS1.I11.R25673				MC20.MG20.AS1.I1.C1702						MC20.MG7.AS1.I9.R1135		MC20.MG21.AS1.I19.R38441							MC20.MG31.AS1.I1.C14762	MC20.MG30.AS1.I1.C1435			MC20.MG22.AS1.I22.R12338	MC20.MG23.AS1.I1.C1279	MC20.MG24.AS1.I1.C12923	MC20.MG25.AS1.I1.C9102			MC20.MG28.AS1.I17.R1074	MC20.MG37.AS1.I1.C5652				MC20.MG36.AS1.I1.C1356
MC20.MG16.AS1.I14.R26886		MC20.MG18.AS1.I11.R25924				MC20.MG20.AS1.I1.C1703						MC20.MG7.AS1.I9.R1157		MC20.MG21.AS1.I19.R38617							MC20.MG31.AS1.I1.C14764	MC20.MG30.AS1.I1.C14353			MC20.MG22.AS1.I22.R12414	MC20.MG23.AS1.I1.C1280	MC20.MG24.AS1.I1.C12926	MC20.MG25.AS1.I1.C9108			MC20.MG28.AS1.I17.R10791	MC20.MG37.AS1.I1.C5664				MC20.MG36.AS1.I1.C1357
MC20.MG16.AS1.I14.R27039		MC20.MG18.AS1.I11.R25951				MC20.MG20.AS1.I1.C1807						MC20.MG7.AS1.I9.R1158		MC20.MG21.AS1.I19.R38763							MC20.MG31.AS1.I1.C14806	MC20.MG30.AS1.I1.C1436			MC20.MG22.AS1.I22.R12502	MC20.MG23.AS1.I1.C1281	MC20.MG24.AS1.I1.C12941	MC20.MG25.AS1.I1.C9165			MC20.MG28.AS1.I17.R10926	MC20.MG37.AS1.I1.C5691				MC20.MG36.AS1.I1.C1358
MC20.MG16.AS1.I14.R27116		MC20.MG18.AS1.I11.R2654				MC20.MG20.AS1.I1.C1900						MC20.MG7.AS1.I9.R11685		MC20.MG21.AS1.I19.R38793							MC20.MG31.AS1.I1.C14808	MC20.MG30.AS1.I1.C1437			MC20.MG22.AS1.I22.R12547	MC20.MG23.AS1.I1.C1282	MC20.MG24.AS1.I1.C12963	MC20.MG25.AS1.I1.C9229			MC20.MG28.AS1.I17.R11030	MC20.MG37.AS1.I1.C5774				MC20.MG36.AS1.I1.C13585
MC20.MG16.AS1.I14.R2787		MC20.MG18.AS1.I11.R27040				MC20.MG20.AS1.I1.C1901						MC20.MG7.AS1.I9.R11686		MC20.MG21.AS1.I19.R38795							MC20.MG31.AS1.I1.C14846	MC20.MG30.AS1.I1.C1438			MC20.MG22.AS1.I22.R12569	MC20.MG23.AS1.I1.C1299	MC20.MG24.AS1.I1.C12976	MC20.MG25.AS1.I1.C9237			MC20.MG28.AS1.I17.R11058	MC20.MG37.AS1.I1.C5816				MC20.MG36.AS1.I1.C1359
MC20.MG16.AS1.I14.R27965		MC20.MG18.AS1.I11.R2711				MC20.MG20.AS1.I1.C1902						MC20.MG7.AS1.I9.R11736		MC20.MG21.AS1.I19.R39068							MC20.MG31.AS1.I1.C14867	MC20.MG30.AS1.I1.C1439			MC20.MG22.AS1.I22.R12605	MC20.MG23.AS1.I1.C1300	MC20.MG24.AS1.I1.C13011	MC20.MG25.AS1.I1.C9316			MC20.MG28.AS1.I17.R11313	MC20.MG37.AS1.I1.C5829				MC20.MG36.AS1.I1.C1360
MC20.MG16.AS1.I14.R28058		MC20.MG18.AS1.I11.R27158				MC20.MG20.AS1.I1.C1903						MC20.MG7.AS1.I9.R11737		MC20.MG21.AS1.I19.R39454							MC20.MG31.AS1.I1.C14869	MC20.MG30.AS1.I1.C1440			MC20.MG22.AS1.I22.R12644	MC20.MG23.AS1.I1.C1301	MC20.MG24.AS1.I1.C13012	MC20.MG25.AS1.I1.C9324			MC20.MG28.AS1.I17.R11340	MC20.MG37.AS1.I1.C5867				MC20.MG36.AS1.I1.C1361
MC20.MG16.AS1.I14.R28146		MC20.MG18.AS1.I11.R27259				MC20.MG20.AS1.I1.C2065						MC20.MG7.AS1.I9.R11838		MC20.MG21.AS1.I19.R39578							MC20.MG31.AS1.I1.C14934	MC20.MG30.AS1.I1.C14466			MC20.MG22.AS1.I22.R12679	MC20.MG23.AS1.I1.C1302	MC20.MG24.AS1.I1.C13058	MC20.MG25.AS1.I1.C9332			MC20.MG28.AS1.I17.R11535	MC20.MG37.AS1.I1.C5929				MC20.MG36.AS1.I1.C1362
MC20.MG16.AS1.I14.R28286		MC20.MG18.AS1.I11.R27308				MC20.MG20.AS1.I1.C2066						MC20.MG7.AS1.I9.R11839		MC20.MG21.AS1.I19.R39999							MC20.MG31.AS1.I1.C14945	MC20.MG30.AS1.I1.C1450			MC20.MG22.AS1.I22.R12742	MC20.MG23.AS1.I1.C1309	MC20.MG24.AS1.I1.C13095	MC20.MG25.AS1.I1.C9463			MC20.MG28.AS1.I17.R1157	MC20.MG37.AS1.I1.C5938				MC20.MG36.AS1.I1.C13834
MC20.MG16.AS1.I14.R2835		MC20.MG18.AS1.I11.R27486				MC20.MG20.AS1.I1.C2076						MC20.MG7.AS1.I9.R12006		MC20.MG21.AS1.I19.R40003							MC20.MG31.AS1.I1.C14946	MC20.MG30.AS1.I1.C1451			MC20.MG22.AS1.I22.R12773	MC20.MG23.AS1.I1.C1310	MC20.MG24.AS1.I1.C13114	MC20.MG25.AS1.I1.C9588			MC20.MG28.AS1.I17.R11637	MC20.MG37.AS1.I1.C5946				MC20.MG36.AS1.I1.C13925
MC20.MG16.AS1.I14.R28660		MC20.MG18.AS1.I11.R27626				MC20.MG20.AS1.I1.C2077						MC20.MG7.AS1.I9.R1217		MC20.MG21.AS1.I19.R40331							MC20.MG31.AS1.I1.C14965	MC20.MG30.AS1.I1.C1452			MC20.MG22.AS1.I22.R12894	MC20.MG23.AS1.I1.C1311	MC20.MG24.AS1.I1.C13122	MC20.MG25.AS1.I1.C9601			MC20.MG28.AS1.I17.R11757	MC20.MG37.AS1.I1.C6061				MC20.MG36.AS1.I1.C13930
MC20.MG16.AS1.I14.R2872		MC20.MG18.AS1.I11.R27677				MC20.MG20.AS1.I1.C2078						MC20.MG7.AS1.I9.R12198		MC20.MG21.AS1.I19.R40765							MC20.MG31.AS1.I1.C14973	MC20.MG30.AS1.I1.C1453			MC20.MG22.AS1.I22.R12985	MC20.MG23.AS1.I1.C1312	MC20.MG24.AS1.I1.C13146	MC20.MG25.AS1.I1.C9644			MC20.MG28.AS1.I17.R11814	MC20.MG37.AS1.I1.C6074				MC20.MG36.AS1.I1.C14208
MC20.MG16.AS1.I14.R29754		MC20.MG18.AS1.I11.R28031				MC20.MG20.AS1.I1.C2079						MC20.MG7.AS1.I9.R12464		MC20.MG21.AS1.I19.R4078							MC20.MG31.AS1.I1.C15072	MC20.MG30.AS1.I1.C1454			MC20.MG22.AS1.I22.R13088	MC20.MG23.AS1.I1.C1313	MC20.MG24.AS1.I1.C13225	MC20.MG25.AS1.I1.C9750			MC20.MG28.AS1.I17.R11815	MC20.MG37.AS1.I1.C6104				MC20.MG36.AS1.I1.C14230
MC20.MG16.AS1.I14.R29961		MC20.MG18.AS1.I11.R28046				MC20.MG20.AS1.I1.C2080						MC20.MG7.AS1.I9.R12465		MC20.MG21.AS1.I19.R41376							MC20.MG31.AS1.I1.C15081	MC20.MG30.AS1.I1.C1455			MC20.MG22.AS1.I22.R13135	MC20.MG23.AS1.I1.C1314	MC20.MG24.AS1.I1.C13249	MC20.MG25.AS1.I1.C9863			MC20.MG28.AS1.I17.R11831	MC20.MG37.AS1.I1.C6204				MC20.MG36.AS1.I1.C14328
MC20.MG16.AS1.I14.R30166		MC20.MG18.AS1.I11.R28110				MC20.MG20.AS1.I1.C2096						MC20.MG7.AS1.I9.R12589		MC20.MG21.AS1.I19.R4192							MC20.MG31.AS1.I1.C15288	MC20.MG30.AS1.I1.C1456			MC20.MG22.AS1.I22.R13245	MC20.MG23.AS1.I1.C1315	MC20.MG24.AS1.I1.C13295	MC20.MG25.AS1.I1.C9906			MC20.MG28.AS1.I17.R11867	MC20.MG37.AS1.I1.C6207				MC20.MG36.AS1.I1.C14363
MC20.MG16.AS1.I14.R3033		MC20.MG18.AS1.I11.R28536				MC20.MG20.AS1.I1.C2097						MC20.MG7.AS1.I9.R12590		MC20.MG21.AS1.I19.R41996							MC20.MG31.AS1.I1.C15339	MC20.MG30.AS1.I1.C1474			MC20.MG22.AS1.I22.R13334	MC20.MG23.AS1.I1.C1316	MC20.MG24.AS1.I1.C13318	MC20.MG25.AS1.I1.C9974			MC20.MG28.AS1.I17.R11934	MC20.MG37.AS1.I1.C6348				MC20.MG36.AS1.I1.C14393
MC20.MG16.AS1.I14.R3036		MC20.MG18.AS1.I11.R28681				MC20.MG20.AS1.I1.C2098						MC20.MG7.AS1.I9.R12686		MC20.MG21.AS1.I19.R42055							MC20.MG31.AS1.I1.C15445	MC20.MG30.AS1.I1.C1475			MC20.MG22.AS1.I22.R1348	MC20.MG23.AS1.I1.C1317	MC20.MG24.AS1.I1.C13320	MC20.MG25.AS1.I11.C2			MC20.MG28.AS1.I17.R12	MC20.MG37.AS1.I1.C6412				MC20.MG36.AS1.I1.C14410
MC20.MG16.AS1.I14.R30449		MC20.MG18.AS1.I11.R28704				MC20.MG20.AS1.I1.C2111						MC20.MG7.AS1.I9.R12766		MC20.MG21.AS1.I19.R42075							MC20.MG31.AS1.I1.C15525	MC20.MG30.AS1.I1.C1476			MC20.MG22.AS1.I22.R13716	MC20.MG23.AS1.I1.C1318	MC20.MG24.AS1.I1.C13427	MC20.MG25.AS1.I12.C141			MC20.MG28.AS1.I17.R12024	MC20.MG37.AS1.I1.C6413				MC20.MG36.AS1.I1.C14482
MC20.MG16.AS1.I14.R30478		MC20.MG18.AS1.I11.R28854				MC20.MG20.AS1.I1.C2112						MC20.MG7.AS1.I9.R13071		MC20.MG21.AS1.I19.R42898							MC20.MG31.AS1.I1.C1555	MC20.MG30.AS1.I1.C1477			MC20.MG22.AS1.I22.R1386	MC20.MG23.AS1.I1.C1321	MC20.MG24.AS1.I1.C13497	MC20.MG25.AS1.I12.C142			MC20.MG28.AS1.I17.R12047	MC20.MG37.AS1.I1.C6457				MC20.MG36.AS1.I1.C14681
MC20.MG16.AS1.I14.R3077		MC20.MG18.AS1.I11.R28896				MC20.MG20.AS1.I1.C2113						MC20.MG7.AS1.I9.R13485		MC20.MG21.AS1.I19.R4354							MC20.MG31.AS1.I1.C1556	MC20.MG30.AS1.I1.C1478			MC20.MG22.AS1.I22.R13888	MC20.MG23.AS1.I1.C1337	MC20.MG24.AS1.I1.C13516	MC20.MG25.AS1.I12.C147			MC20.MG28.AS1.I17.R12058	MC20.MG37.AS1.I1.C6499				MC20.MG36.AS1.I1.C14805
MC20.MG16.AS1.I14.R30953		MC20.MG18.AS1.I11.R29073				MC20.MG20.AS1.I1.C2114						MC20.MG7.AS1.I9.R13514		MC20.MG21.AS1.I19.R4360							MC20.MG31.AS1.I1.C15602	MC20.MG30.AS1.I1.C1479			MC20.MG22.AS1.I22.R13991	MC20.MG23.AS1.I1.C1338	MC20.MG24.AS1.I1.C13517	MC20.MG25.AS1.I12.C148			MC20.MG28.AS1.I17.R12093	MC20.MG37.AS1.I1.C6548				MC20.MG36.AS1.I1.C14924
MC20.MG16.AS1.I14.R31006		MC20.MG18.AS1.I11.R2914				MC20.MG20.AS1.I1.C2115						MC20.MG7.AS1.I9.R13515		MC20.MG21.AS1.I19.R43693							MC20.MG31.AS1.I1.C15603	MC20.MG30.AS1.I1.C14808			MC20.MG22.AS1.I22.R13994	MC20.MG23.AS1.I1.C1339	MC20.MG24.AS1.I1.C13553	MC20.MG25.AS1.I12.C157			MC20.MG28.AS1.I17.R12126	MC20.MG37.AS1.I1.C6563				MC20.MG36.AS1.I1.C14985
MC20.MG16.AS1.I14.R31190		MC20.MG18.AS1.I11.R29192				MC20.MG20.AS1.I1.C2116						MC20.MG7.AS1.I9.R1356		MC20.MG21.AS1.I19.R43930							MC20.MG31.AS1.I1.C15622	MC20.MG30.AS1.I1.C14859			MC20.MG22.AS1.I22.R13997	MC20.MG23.AS1.I1.C1343	MC20.MG24.AS1.I1.C1364	MC20.MG25.AS1.I12.C158			MC20.MG28.AS1.I17.R12163	MC20.MG37.AS1.I1.C6583				MC20.MG36.AS1.I1.C14991
MC20.MG16.AS1.I14.R31326		MC20.MG18.AS1.I11.R29661				MC20.MG20.AS1.I1.C2156						MC20.MG7.AS1.I9.R1357		MC20.MG21.AS1.I19.R44192							MC20.MG31.AS1.I1.C15627	MC20.MG30.AS1.I1.C14924			MC20.MG22.AS1.I22.R14069	MC20.MG23.AS1.I1.C1344	MC20.MG24.AS1.I1.C1376	MC20.MG25.AS1.I12.C165			MC20.MG28.AS1.I17.R12174	MC20.MG37.AS1.I1.C6624				MC20.MG36.AS1.I1.C1503
MC20.MG16.AS1.I14.R31347		MC20.MG18.AS1.I11.R29981				MC20.MG20.AS1.I1.C2157						MC20.MG7.AS1.I9.R13800		MC20.MG21.AS1.I19.R44219							MC20.MG31.AS1.I1.C1566	MC20.MG30.AS1.I1.C1501			MC20.MG22.AS1.I22.R14125	MC20.MG23.AS1.I1.C1345	MC20.MG24.AS1.I1.C1377	MC20.MG25.AS1.I12.C166			MC20.MG28.AS1.I17.R12190	MC20.MG37.AS1.I1.C6701				MC20.MG36.AS1.I1.C1504
MC20.MG16.AS1.I14.R31411		MC20.MG18.AS1.I11.R30515				MC20.MG20.AS1.I1.C2158						MC20.MG7.AS1.I9.R13801		MC20.MG21.AS1.I19.R45330							MC20.MG31.AS1.I1.C1567	MC20.MG30.AS1.I1.C1502			MC20.MG22.AS1.I22.R14194	MC20.MG23.AS1.I1.C1351	MC20.MG24.AS1.I1.C1378	MC20.MG25.AS1.I12.C349			MC20.MG28.AS1.I17.R1224	MC20.MG37.AS1.I1.C6901				MC20.MG36.AS1.I1.C15047
MC20.MG16.AS1.I14.R31543		MC20.MG18.AS1.I11.R30536				MC20.MG20.AS1.I1.C2159						MC20.MG7.AS1.I9.R13919		MC20.MG21.AS1.I19.R46249							MC20.MG31.AS1.I1.C15670	MC20.MG30.AS1.I1.C1503			MC20.MG22.AS1.I22.R14231	MC20.MG23.AS1.I1.C1352	MC20.MG24.AS1.I1.C1379	MC20.MG25.AS1.I12.C350			MC20.MG28.AS1.I17.R12459	MC20.MG37.AS1.I1.C6945				MC20.MG36.AS1.I1.C1505
MC20.MG16.AS1.I14.R31571		MC20.MG18.AS1.I11.R30669				MC20.MG20.AS1.I1.C2227						MC20.MG7.AS1.I9.R13920		MC20.MG21.AS1.I19.R46402							MC20.MG31.AS1.I1.C1568	MC20.MG30.AS1.I1.C1514			MC20.MG22.AS1.I22.R14248	MC20.MG23.AS1.I1.C1357	MC20.MG24.AS1.I1.C1387	MC20.MG25.AS1.I12.C455			MC20.MG28.AS1.I17.R12617	MC20.MG37.AS1.I1.C6965				MC20.MG36.AS1.I1.C1506
MC20.MG16.AS1.I14.R3175		MC20.MG18.AS1.I11.R30726				MC20.MG20.AS1.I1.C2228						MC20.MG7.AS1.I9.R13933		MC20.MG21.AS1.I19.R46640							MC20.MG31.AS1.I1.C15681	MC20.MG30.AS1.I1.C1515			MC20.MG22.AS1.I22.R14330	MC20.MG23.AS1.I1.C1358	MC20.MG24.AS1.I1.C1388	MC20.MG25.AS1.I12.C456			MC20.MG28.AS1.I17.R12628	MC20.MG37.AS1.I1.C6987				MC20.MG36.AS1.I1.C1507
MC20.MG16.AS1.I14.R31757		MC20.MG18.AS1.I11.R30787				MC20.MG20.AS1.I1.C2229						MC20.MG7.AS1.I9.R13934		MC20.MG21.AS1.I19.R46645							MC20.MG31.AS1.I1.C1569	MC20.MG30.AS1.I1.C1516			MC20.MG22.AS1.I22.R14450	MC20.MG23.AS1.I1.C1359	MC20.MG24.AS1.I1.C1389	MC20.MG25.AS1.I12.C523			MC20.MG28.AS1.I17.R1263	MC20.MG37.AS1.I1.C7023				MC20.MG36.AS1.I1.C1508
MC20.MG16.AS1.I14.R31796		MC20.MG18.AS1.I11.R3103				MC20.MG20.AS1.I1.C2269						MC20.MG7.AS1.I9.R14021		MC20.MG21.AS1.I19.R47076							MC20.MG31.AS1.I1.C15699	MC20.MG30.AS1.I1.C1517			MC20.MG22.AS1.I22.R14509	MC20.MG23.AS1.I1.C1360	MC20.MG24.AS1.I1.C1390	MC20.MG25.AS1.I12.C524			MC20.MG28.AS1.I17.R12641	MC20.MG37.AS1.I1.C7030				MC20.MG36.AS1.I1.C1509
MC20.MG16.AS1.I14.R31803		MC20.MG18.AS1.I11.R31092				MC20.MG20.AS1.I1.C2270						MC20.MG7.AS1.I9.R14187		MC20.MG21.AS1.I19.R47249							MC20.MG31.AS1.I1.C15717	MC20.MG30.AS1.I1.C1518			MC20.MG22.AS1.I22.R14675	MC20.MG23.AS1.I1.C1364	MC20.MG24.AS1.I1.C1437	MC20.MG25.AS1.I12.C75			MC20.MG28.AS1.I17.R1266	MC20.MG37.AS1.I1.C7060				MC20.MG36.AS1.I1.C1517
MC20.MG16.AS1.I14.R31859		MC20.MG18.AS1.I11.R3110				MC20.MG20.AS1.I1.C2271						MC20.MG7.AS1.I9.R14422		MC20.MG21.AS1.I19.R47257							MC20.MG31.AS1.I1.C15721	MC20.MG30.AS1.I1.C1519			MC20.MG22.AS1.I22.R15171	MC20.MG23.AS1.I1.C1365	MC20.MG24.AS1.I1.C1438	MC20.MG25.AS1.I12.C76			MC20.MG28.AS1.I17.R12805	MC20.MG37.AS1.I1.C7085				MC20.MG36.AS1.I1.C15177
MC20.MG16.AS1.I14.R3246		MC20.MG18.AS1.I11.R31175				MC20.MG20.AS1.I1.C2280						MC20.MG7.AS1.I9.R14541		MC20.MG21.AS1.I19.R47581							MC20.MG31.AS1.I1.C1585	MC20.MG30.AS1.I1.C1520			MC20.MG22.AS1.I22.R15230	MC20.MG23.AS1.I1.C1366	MC20.MG24.AS1.I1.C1439	MC20.MG25.AS1.I14.C21			MC20.MG28.AS1.I17.R12935	MC20.MG37.AS1.I1.C7092				MC20.MG36.AS1.I1.C1518
MC20.MG16.AS1.I14.R32520		MC20.MG18.AS1.I11.R31296				MC20.MG20.AS1.I1.C2281						MC20.MG7.AS1.I9.R14584		MC20.MG21.AS1.I19.R47869							MC20.MG31.AS1.I1.C15859	MC20.MG30.AS1.I1.C1521			MC20.MG22.AS1.I22.R15337	MC20.MG23.AS1.I1.C1367	MC20.MG24.AS1.I1.C1440	MC20.MG25.AS1.I14.C22			MC20.MG28.AS1.I17.R1295	MC20.MG37.AS1.I1.C7109				MC20.MG36.AS1.I1.C1519
MC20.MG16.AS1.I14.R32557		MC20.MG18.AS1.I11.R31497				MC20.MG20.AS1.I1.C2282						MC20.MG7.AS1.I9.R14585		MC20.MG21.AS1.I19.R48333							MC20.MG31.AS1.I1.C1586	MC20.MG30.AS1.I1.C1522			MC20.MG22.AS1.I22.R15500	MC20.MG23.AS1.I1.C1369	MC20.MG24.AS1.I1.C1566	MC20.MG25.AS1.I15.C7			MC20.MG28.AS1.I17.R12985	MC20.MG37.AS1.I1.C7113				MC20.MG36.AS1.I1.C1520
MC20.MG16.AS1.I14.R32794		MC20.MG18.AS1.I11.R31613				MC20.MG20.AS1.I1.C2300						MC20.MG7.AS1.I9.R14612		MC20.MG21.AS1.I19.R48726							MC20.MG31.AS1.I1.C1587	MC20.MG30.AS1.I1.C1523			MC20.MG22.AS1.I22.R15781	MC20.MG23.AS1.I1.C1370	MC20.MG24.AS1.I1.C1567	MC20.MG25.AS1.I15.C8			MC20.MG28.AS1.I17.R13097	MC20.MG37.AS1.I1.C7147				MC20.MG36.AS1.I1.C1521
MC20.MG16.AS1.I14.R32895		MC20.MG18.AS1.I11.R31684				MC20.MG20.AS1.I1.C2301						MC20.MG7.AS1.I9.R14613		MC20.MG21.AS1.I19.R49005							MC20.MG31.AS1.I1.C1588	MC20.MG30.AS1.I1.C15239			MC20.MG22.AS1.I22.R15895	MC20.MG23.AS1.I1.C1386	MC20.MG24.AS1.I1.C1568	MC20.MG25.AS1.I16.R10302			MC20.MG28.AS1.I17.R13404	MC20.MG37.AS1.I1.C7174				MC20.MG36.AS1.I1.C1522
MC20.MG16.AS1.I14.R33053		MC20.MG18.AS1.I11.R31748				MC20.MG20.AS1.I1.C2302						MC20.MG7.AS1.I9.R14727		MC20.MG21.AS1.I19.R49452							MC20.MG31.AS1.I1.C1589	MC20.MG30.AS1.I1.C1524			MC20.MG22.AS1.I22.R16460	MC20.MG23.AS1.I1.C1387	MC20.MG24.AS1.I1.C1651	MC20.MG25.AS1.I16.R10345			MC20.MG28.AS1.I17.R13440	MC20.MG37.AS1.I1.C7198				MC20.MG36.AS1.I1.C15245
MC20.MG16.AS1.I14.R33144		MC20.MG18.AS1.I11.R31816				MC20.MG20.AS1.I1.C2350						MC20.MG7.AS1.I9.R14728		MC20.MG21.AS1.I19.R4960							MC20.MG31.AS1.I1.C15903	MC20.MG30.AS1.I1.C1525			MC20.MG22.AS1.I22.R16465	MC20.MG23.AS1.I1.C1395	MC20.MG24.AS1.I1.C1652	MC20.MG25.AS1.I16.R10534			MC20.MG28.AS1.I17.R1350	MC20.MG37.AS1.I1.C7253				MC20.MG36.AS1.I1.C15251
MC20.MG16.AS1.I14.R33148		MC20.MG18.AS1.I11.R31837				MC20.MG20.AS1.I1.C2351						MC20.MG7.AS1.I9.R14756		MC20.MG21.AS1.I19.R50279							MC20.MG31.AS1.I1.C15929	MC20.MG30.AS1.I1.C1526			MC20.MG22.AS1.I22.R16504	MC20.MG23.AS1.I1.C1396	MC20.MG24.AS1.I1.C1653	MC20.MG25.AS1.I16.R10591			MC20.MG28.AS1.I17.R1362	MC20.MG37.AS1.I1.C7287				MC20.MG36.AS1.I1.C15329
MC20.MG16.AS1.I14.R33169		MC20.MG18.AS1.I11.R31917				MC20.MG20.AS1.I1.C2385						MC20.MG7.AS1.I9.R14757		MC20.MG21.AS1.I19.R50317							MC20.MG31.AS1.I1.C15960	MC20.MG30.AS1.I1.C15279			MC20.MG22.AS1.I22.R16730	MC20.MG23.AS1.I1.C1400	MC20.MG24.AS1.I1.C1778	MC20.MG25.AS1.I16.R10602			MC20.MG28.AS1.I17.R13661	MC20.MG37.AS1.I1.C7308				MC20.MG36.AS1.I1.C15435
MC20.MG16.AS1.I14.R33226		MC20.MG18.AS1.I11.R32029				MC20.MG20.AS1.I1.C2386						MC20.MG7.AS1.I9.R15007		MC20.MG21.AS1.I19.R50677							MC20.MG31.AS1.I1.C15982	MC20.MG30.AS1.I1.C15392			MC20.MG22.AS1.I22.R1680	MC20.MG23.AS1.I1.C1401	MC20.MG24.AS1.I1.C1779	MC20.MG25.AS1.I16.R10632			MC20.MG28.AS1.I17.R13738	MC20.MG37.AS1.I1.C7330				MC20.MG36.AS1.I1.C15448
MC20.MG16.AS1.I14.R3368		MC20.MG18.AS1.I11.R32085				MC20.MG20.AS1.I1.C2387						MC20.MG7.AS1.I9.R15008		MC20.MG21.AS1.I19.R5099							MC20.MG31.AS1.I1.C16018	MC20.MG30.AS1.I1.C15417			MC20.MG22.AS1.I22.R1686	MC20.MG23.AS1.I1.C1402	MC20.MG24.AS1.I1.C1780	MC20.MG25.AS1.I16.R10684			MC20.MG28.AS1.I17.R13849	MC20.MG37.AS1.I1.C7343				MC20.MG36.AS1.I1.C1547
MC20.MG16.AS1.I14.R33959		MC20.MG18.AS1.I11.R32176				MC20.MG20.AS1.I1.C2453						MC20.MG7.AS1.I9.R15061		MC20.MG21.AS1.I19.R51067							MC20.MG31.AS1.I1.C16064	MC20.MG30.AS1.I1.C1544			MC20.MG22.AS1.I22.R16946	MC20.MG23.AS1.I1.C1403	MC20.MG24.AS1.I1.C1781	MC20.MG25.AS1.I16.R10740			MC20.MG28.AS1.I17.R13887	MC20.MG37.AS1.I1.C7350				MC20.MG36.AS1.I1.C1548
MC20.MG16.AS1.I14.R34106		MC20.MG18.AS1.I11.R32394				MC20.MG20.AS1.I1.C2454						MC20.MG7.AS1.I9.R15323		MC20.MG21.AS1.I19.R51149							MC20.MG31.AS1.I1.C16129	MC20.MG30.AS1.I1.C1545			MC20.MG22.AS1.I22.R17007	MC20.MG23.AS1.I1.C1404	MC20.MG24.AS1.I1.C1807	MC20.MG25.AS1.I16.R10862			MC20.MG28.AS1.I17.R13910	MC20.MG37.AS1.I1.C7368				MC20.MG36.AS1.I1.C15488
MC20.MG16.AS1.I14.R34469		MC20.MG18.AS1.I11.R32645				MC20.MG20.AS1.I1.C2532						MC20.MG7.AS1.I9.R15361		MC20.MG21.AS1.I19.R51339							MC20.MG31.AS1.I1.C16256	MC20.MG30.AS1.I1.C1546			MC20.MG22.AS1.I22.R1702	MC20.MG23.AS1.I1.C1405	MC20.MG24.AS1.I1.C1808	MC20.MG25.AS1.I16.R10960			MC20.MG28.AS1.I17.R13970	MC20.MG37.AS1.I1.C7375				MC20.MG36.AS1.I1.C1549
MC20.MG16.AS1.I14.R34606		MC20.MG18.AS1.I11.R32651				MC20.MG20.AS1.I1.C2533						MC20.MG7.AS1.I9.R15362		MC20.MG21.AS1.I19.R51498							MC20.MG31.AS1.I1.C16260	MC20.MG30.AS1.I1.C1547			MC20.MG22.AS1.I22.R17134	MC20.MG23.AS1.I1.C1406	MC20.MG24.AS1.I1.C1954	MC20.MG25.AS1.I16.R11010			MC20.MG28.AS1.I17.R13972	MC20.MG37.AS1.I1.C7389				MC20.MG36.AS1.I1.C1550
MC20.MG16.AS1.I14.R34746		MC20.MG18.AS1.I11.R32700				MC20.MG20.AS1.I1.C2540						MC20.MG7.AS1.I9.R15414		MC20.MG21.AS1.I19.R51705							MC20.MG31.AS1.I1.C16261	MC20.MG30.AS1.I1.C1548			MC20.MG22.AS1.I22.R17649	MC20.MG23.AS1.I1.C1407	MC20.MG24.AS1.I1.C1955	MC20.MG25.AS1.I16.R11068			MC20.MG28.AS1.I17.R14065	MC20.MG37.AS1.I1.C7403				MC20.MG36.AS1.I1.C1551
MC20.MG16.AS1.I14.R34916		MC20.MG18.AS1.I11.R32782				MC20.MG20.AS1.I1.C2541						MC20.MG7.AS1.I9.R15415		MC20.MG21.AS1.I19.R51809							MC20.MG31.AS1.I1.C16263	MC20.MG30.AS1.I1.C15480			MC20.MG22.AS1.I22.R17652	MC20.MG23.AS1.I1.C1408	MC20.MG24.AS1.I1.C1956	MC20.MG25.AS1.I16.R11218			MC20.MG28.AS1.I17.R14077	MC20.MG37.AS1.I1.C7413				MC20.MG36.AS1.I1.C15514
MC20.MG16.AS1.I14.R35269		MC20.MG18.AS1.I11.R32927				MC20.MG20.AS1.I1.C2542						MC20.MG7.AS1.I9.R15419		MC20.MG21.AS1.I19.R5190							MC20.MG31.AS1.I1.C16357	MC20.MG30.AS1.I1.C15558			MC20.MG22.AS1.I22.R17780	MC20.MG23.AS1.I1.C1421	MC20.MG24.AS1.I1.C1988	MC20.MG25.AS1.I16.R1125			MC20.MG28.AS1.I17.R14108	MC20.MG37.AS1.I1.C7478				MC20.MG36.AS1.I1.C1552
MC20.MG16.AS1.I14.R35367		MC20.MG18.AS1.I11.R33156				MC20.MG20.AS1.I1.C2676						MC20.MG7.AS1.I9.R15420		MC20.MG21.AS1.I19.R51904							MC20.MG31.AS1.I1.C16370	MC20.MG30.AS1.I1.C1556			MC20.MG22.AS1.I22.R18240	MC20.MG23.AS1.I1.C1422	MC20.MG24.AS1.I1.C1989	MC20.MG25.AS1.I16.R11251			MC20.MG28.AS1.I17.R14200	MC20.MG37.AS1.I1.C7495				MC20.MG36.AS1.I1.C1553
MC20.MG16.AS1.I14.R35580		MC20.MG18.AS1.I11.R33387				MC20.MG20.AS1.I1.C2677						MC20.MG7.AS1.I9.R15433		MC20.MG21.AS1.I19.R52188							MC20.MG31.AS1.I1.C16475	MC20.MG30.AS1.I1.C1557			MC20.MG22.AS1.I22.R18441	MC20.MG23.AS1.I1.C1430	MC20.MG24.AS1.I1.C1990	MC20.MG25.AS1.I16.R11284			MC20.MG28.AS1.I17.R14226	MC20.MG37.AS1.I1.C7525				MC20.MG36.AS1.I1.C1559
MC20.MG16.AS1.I14.R35613		MC20.MG18.AS1.I11.R3351				MC20.MG20.AS1.I1.C2746						MC20.MG7.AS1.I9.R15477		MC20.MG21.AS1.I19.R52230							MC20.MG31.AS1.I1.C16482	MC20.MG30.AS1.I1.C1558			MC20.MG22.AS1.I22.R18491	MC20.MG23.AS1.I1.C1431	MC20.MG24.AS1.I1.C2001	MC20.MG25.AS1.I16.R11513			MC20.MG28.AS1.I17.R14287	MC20.MG37.AS1.I1.C7589				MC20.MG36.AS1.I1.C15591
MC20.MG16.AS1.I14.R3583		MC20.MG18.AS1.I11.R34278				MC20.MG20.AS1.I1.C2747						MC20.MG7.AS1.I9.R15478		MC20.MG21.AS1.I19.R52362							MC20.MG31.AS1.I1.C1650	MC20.MG30.AS1.I1.C1559			MC20.MG22.AS1.I22.R1852	MC20.MG23.AS1.I1.C1432	MC20.MG24.AS1.I1.C2002	MC20.MG25.AS1.I16.R11578			MC20.MG28.AS1.I17.R14307	MC20.MG37.AS1.I1.C7591				MC20.MG36.AS1.I1.C1560
MC20.MG16.AS1.I14.R35919		MC20.MG18.AS1.I11.R34629				MC20.MG20.AS1.I1.C2792						MC20.MG7.AS1.I9.R1555		MC20.MG21.AS1.I19.R52503							MC20.MG31.AS1.I1.C16507	MC20.MG30.AS1.I1.C1560			MC20.MG22.AS1.I22.R18580	MC20.MG23.AS1.I1.C1433	MC20.MG24.AS1.I1.C2003	MC20.MG25.AS1.I16.R12403			MC20.MG28.AS1.I17.R14377	MC20.MG37.AS1.I1.C7638				MC20.MG36.AS1.I1.C1561
MC20.MG16.AS1.I14.R35963		MC20.MG18.AS1.I11.R34686				MC20.MG20.AS1.I1.C2793						MC20.MG7.AS1.I9.R15559		MC20.MG21.AS1.I19.R52515							MC20.MG31.AS1.I1.C1651	MC20.MG30.AS1.I1.C15609			MC20.MG22.AS1.I22.R18617	MC20.MG23.AS1.I1.C1434	MC20.MG24.AS1.I1.C2063	MC20.MG25.AS1.I16.R12467			MC20.MG28.AS1.I17.R14656	MC20.MG37.AS1.I1.C7641				MC20.MG36.AS1.I1.C1562
MC20.MG16.AS1.I14.R36327		MC20.MG18.AS1.I11.R3479				MC20.MG20.AS1.I1.C2797						MC20.MG7.AS1.I9.R1556		MC20.MG21.AS1.I19.R52566							MC20.MG31.AS1.I1.C1652	MC20.MG30.AS1.I1.C1561			MC20.MG22.AS1.I22.R18702	MC20.MG23.AS1.I1.C1435	MC20.MG24.AS1.I1.C2064	MC20.MG25.AS1.I16.R1257			MC20.MG28.AS1.I17.R14714	MC20.MG37.AS1.I1.C7661				MC20.MG36.AS1.I1.C1563
MC20.MG16.AS1.I14.R36385		MC20.MG18.AS1.I11.R34797				MC20.MG20.AS1.I1.C2798						MC20.MG7.AS1.I9.R15785		MC20.MG21.AS1.I19.R5315							MC20.MG31.AS1.I1.C16528	MC20.MG30.AS1.I1.C1573			MC20.MG22.AS1.I22.R18740	MC20.MG23.AS1.I1.C1436	MC20.MG24.AS1.I1.C2065	MC20.MG25.AS1.I16.R12631			MC20.MG28.AS1.I17.R14724	MC20.MG37.AS1.I1.C7796				MC20.MG36.AS1.I1.C1564
MC20.MG16.AS1.I14.R3649		MC20.MG18.AS1.I11.R34810				MC20.MG20.AS1.I1.C2816						MC20.MG7.AS1.I9.R15786		MC20.MG21.AS1.I19.R53316							MC20.MG31.AS1.I1.C16553	MC20.MG30.AS1.I1.C1574			MC20.MG22.AS1.I22.R18922	MC20.MG23.AS1.I1.C1463	MC20.MG24.AS1.I1.C2073	MC20.MG25.AS1.I16.R12861			MC20.MG28.AS1.I17.R14860	MC20.MG37.AS1.I1.C7800				MC20.MG36.AS1.I1.C1565
MC20.MG16.AS1.I14.R36746		MC20.MG18.AS1.I11.R34868				MC20.MG20.AS1.I1.C2817						MC20.MG7.AS1.I9.R15863		MC20.MG21.AS1.I19.R53407							MC20.MG31.AS1.I1.C16578	MC20.MG30.AS1.I1.C1575			MC20.MG22.AS1.I22.R18944	MC20.MG23.AS1.I1.C1464	MC20.MG24.AS1.I1.C2074	MC20.MG25.AS1.I16.R12874			MC20.MG28.AS1.I17.R14873	MC20.MG37.AS1.I1.C7807				MC20.MG36.AS1.I1.C1566
MC20.MG16.AS1.I14.R37016		MC20.MG18.AS1.I11.R35099				MC20.MG20.AS1.I1.C2871						MC20.MG7.AS1.I9.R15864		MC20.MG21.AS1.I19.R53421							MC20.MG31.AS1.I1.C16631	MC20.MG30.AS1.I1.C1576			MC20.MG22.AS1.I22.R19030	MC20.MG23.AS1.I1.C1465	MC20.MG24.AS1.I1.C2075	MC20.MG25.AS1.I16.R12909			MC20.MG28.AS1.I17.R14946	MC20.MG37.AS1.I1.C7860				MC20.MG36.AS1.I1.C1567
MC20.MG16.AS1.I14.R37266		MC20.MG18.AS1.I11.R3514				MC20.MG20.AS1.I1.C2872						MC20.MG7.AS1.I9.R15944		MC20.MG21.AS1.I19.R53561							MC20.MG31.AS1.I1.C16648	MC20.MG30.AS1.I1.C1578			MC20.MG22.AS1.I22.R19131	MC20.MG23.AS1.I1.C1466	MC20.MG24.AS1.I1.C2097	MC20.MG25.AS1.I16.R12912			MC20.MG28.AS1.I17.R14985	MC20.MG37.AS1.I1.C7866				MC20.MG36.AS1.I1.C1568
MC20.MG16.AS1.I14.R37877		MC20.MG18.AS1.I11.R35194				MC20.MG20.AS1.I1.C2873						MC20.MG7.AS1.I9.R15945		MC20.MG21.AS1.I19.R53571							MC20.MG31.AS1.I1.C16656	MC20.MG30.AS1.I1.C1579			MC20.MG22.AS1.I22.R19355	MC20.MG23.AS1.I1.C1467	MC20.MG24.AS1.I1.C2098	MC20.MG25.AS1.I16.R12977			MC20.MG28.AS1.I17.R15007	MC20.MG37.AS1.I1.C7907				MC20.MG36.AS1.I1.C1569
MC20.MG16.AS1.I14.R37961		MC20.MG18.AS1.I11.R35818				MC20.MG20.AS1.I1.C2913						MC20.MG7.AS1.I9.R16104		MC20.MG21.AS1.I19.R53858							MC20.MG31.AS1.I1.C16657	MC20.MG30.AS1.I1.C1580			MC20.MG22.AS1.I22.R19400	MC20.MG23.AS1.I1.C1468	MC20.MG24.AS1.I1.C2099	MC20.MG25.AS1.I16.R13123			MC20.MG28.AS1.I17.R15071	MC20.MG37.AS1.I1.C7949				MC20.MG36.AS1.I1.C1570
MC20.MG16.AS1.I14.R38165		MC20.MG18.AS1.I11.R35952				MC20.MG20.AS1.I1.C2914						MC20.MG7.AS1.I9.R16105		MC20.MG21.AS1.I19.R54003							MC20.MG31.AS1.I1.C16706	MC20.MG30.AS1.I1.C15825			MC20.MG22.AS1.I22.R19523	MC20.MG23.AS1.I1.C1469	MC20.MG24.AS1.I1.C2100	MC20.MG25.AS1.I16.R13148			MC20.MG28.AS1.I17.R15296	MC20.MG37.AS1.I1.C7978				MC20.MG36.AS1.I1.C1575
MC20.MG16.AS1.I14.R38277		MC20.MG18.AS1.I11.R35974				MC20.MG20.AS1.I1.C2915						MC20.MG7.AS1.I9.R16203		MC20.MG21.AS1.I19.R54198							MC20.MG31.AS1.I1.C16801	MC20.MG30.AS1.I1.C15928			MC20.MG22.AS1.I22.R19708	MC20.MG23.AS1.I1.C1470	MC20.MG24.AS1.I1.C2152	MC20.MG25.AS1.I16.R13400			MC20.MG28.AS1.I17.R15394	MC20.MG37.AS1.I1.C8024				MC20.MG36.AS1.I1.C1576
MC20.MG16.AS1.I14.R38528		MC20.MG18.AS1.I11.R36034				MC20.MG20.AS1.I1.C2937						MC20.MG7.AS1.I9.R16436		MC20.MG21.AS1.I19.R54327							MC20.MG31.AS1.I1.C16806	MC20.MG30.AS1.I1.C15931			MC20.MG22.AS1.I22.R19720	MC20.MG23.AS1.I1.C1471	MC20.MG24.AS1.I1.C2153	MC20.MG25.AS1.I16.R13406			MC20.MG28.AS1.I17.R15491	MC20.MG37.AS1.I1.C8045				MC20.MG36.AS1.I1.C1577
MC20.MG16.AS1.I14.R38534		MC20.MG18.AS1.I11.R36049				MC20.MG20.AS1.I1.C2947						MC20.MG7.AS1.I9.R16437		MC20.MG21.AS1.I19.R54346							MC20.MG31.AS1.I1.C16811	MC20.MG30.AS1.I1.C1594			MC20.MG22.AS1.I22.R1973	MC20.MG23.AS1.I1.C1472	MC20.MG24.AS1.I1.C2291	MC20.MG25.AS1.I16.R13431			MC20.MG28.AS1.I17.R15759	MC20.MG37.AS1.I1.C8072				MC20.MG36.AS1.I1.C15842
MC20.MG16.AS1.I14.R38637		MC20.MG18.AS1.I11.R36147				MC20.MG20.AS1.I1.C2972						MC20.MG7.AS1.I9.R16446		MC20.MG21.AS1.I19.R54653							MC20.MG31.AS1.I1.C16854	MC20.MG30.AS1.I1.C1595			MC20.MG22.AS1.I22.R19737	MC20.MG23.AS1.I1.C1473	MC20.MG24.AS1.I1.C2292	MC20.MG25.AS1.I16.R13442			MC20.MG28.AS1.I17.R15876	MC20.MG37.AS1.I1.C8179				MC20.MG36.AS1.I1.C15973
MC20.MG16.AS1.I14.R38719		MC20.MG18.AS1.I11.R36165				MC20.MG20.AS1.I1.C2973						MC20.MG7.AS1.I9.R16621		MC20.MG21.AS1.I19.R54785							MC20.MG31.AS1.I1.C16881	MC20.MG30.AS1.I1.C1596			MC20.MG22.AS1.I22.R19835	MC20.MG23.AS1.I1.C1474	MC20.MG24.AS1.I1.C2293	MC20.MG25.AS1.I16.R13579			MC20.MG28.AS1.I17.R15932	MC20.MG37.AS1.I1.C8270				MC20.MG36.AS1.I1.C1602
MC20.MG16.AS1.I14.R39035		MC20.MG18.AS1.I11.R36276				MC20.MG20.AS1.I1.C2974						MC20.MG7.AS1.I9.R16622		MC20.MG21.AS1.I19.R55030							MC20.MG31.AS1.I1.C16905	MC20.MG30.AS1.I1.C1597			MC20.MG22.AS1.I22.R19910	MC20.MG23.AS1.I1.C1475	MC20.MG24.AS1.I1.C2294	MC20.MG25.AS1.I16.R13755			MC20.MG28.AS1.I17.R15964	MC20.MG37.AS1.I1.C8274				MC20.MG36.AS1.I1.C1603
MC20.MG16.AS1.I14.R39312		MC20.MG18.AS1.I11.R36340				MC20.MG20.AS1.I1.C2975						MC20.MG7.AS1.I9.R16661		MC20.MG21.AS1.I19.R55243							MC20.MG31.AS1.I1.C16922	MC20.MG30.AS1.I1.C1598			MC20.MG22.AS1.I22.R2	MC20.MG23.AS1.I1.C1487	MC20.MG24.AS1.I1.C2295	MC20.MG25.AS1.I16.R13820			MC20.MG28.AS1.I17.R16147	MC20.MG37.AS1.I1.C8282				MC20.MG36.AS1.I1.C1604
MC20.MG16.AS1.I14.R39577		MC20.MG18.AS1.I11.R36404				MC20.MG20.AS1.I1.C3007						MC20.MG7.AS1.I9.R16662		MC20.MG21.AS1.I19.R55556							MC20.MG31.AS1.I1.C16952	MC20.MG30.AS1.I1.C1602			MC20.MG22.AS1.I22.R20245	MC20.MG23.AS1.I1.C1488	MC20.MG24.AS1.I1.C2296	MC20.MG25.AS1.I16.R1386			MC20.MG28.AS1.I17.R16150	MC20.MG37.AS1.I1.C8285				MC20.MG36.AS1.I1.C1606
MC20.MG16.AS1.I14.R39655		MC20.MG18.AS1.I11.R36514				MC20.MG20.AS1.I1.C3035						MC20.MG7.AS1.I9.R16907		MC20.MG21.AS1.I19.R55695							MC20.MG31.AS1.I1.C17001	MC20.MG30.AS1.I1.C1603			MC20.MG22.AS1.I22.R20247	MC20.MG23.AS1.I1.C1489	MC20.MG24.AS1.I1.C2319	MC20.MG25.AS1.I16.R14093			MC20.MG28.AS1.I17.R16180	MC20.MG37.AS1.I1.C8296				MC20.MG36.AS1.I1.C1607
MC20.MG16.AS1.I14.R39731		MC20.MG18.AS1.I11.R3653				MC20.MG20.AS1.I1.C3099						MC20.MG7.AS1.I9.R17004		MC20.MG21.AS1.I19.R55840							MC20.MG31.AS1.I1.C1703	MC20.MG30.AS1.I1.C1604			MC20.MG22.AS1.I22.R20331	MC20.MG23.AS1.I1.C1493	MC20.MG24.AS1.I1.C2320	MC20.MG25.AS1.I16.R14400			MC20.MG28.AS1.I17.R16251	MC20.MG37.AS1.I1.C8306				MC20.MG36.AS1.I1.C16077
MC20.MG16.AS1.I14.R40269		MC20.MG18.AS1.I11.R36584				MC20.MG20.AS1.I1.C3101						MC20.MG7.AS1.I9.R17005		MC20.MG21.AS1.I19.R55853							MC20.MG31.AS1.I1.C1704	MC20.MG30.AS1.I1.C16046			MC20.MG22.AS1.I22.R20440	MC20.MG23.AS1.I1.C1494	MC20.MG24.AS1.I1.C2363	MC20.MG25.AS1.I16.R14590			MC20.MG28.AS1.I17.R16264	MC20.MG37.AS1.I1.C8311				MC20.MG36.AS1.I1.C1608
MC20.MG16.AS1.I14.R40373		MC20.MG18.AS1.I11.R36615				MC20.MG20.AS1.I1.C3118						MC20.MG7.AS1.I9.R17298		MC20.MG21.AS1.I19.R55920							MC20.MG31.AS1.I1.C1705	MC20.MG30.AS1.I1.C1605			MC20.MG22.AS1.I22.R20622	MC20.MG23.AS1.I1.C1495	MC20.MG24.AS1.I1.C2364	MC20.MG25.AS1.I16.R14637			MC20.MG28.AS1.I17.R16284	MC20.MG37.AS1.I1.C8359				MC20.MG36.AS1.I1.C16094
MC20.MG16.AS1.I14.R40387		MC20.MG18.AS1.I11.R36793				MC20.MG20.AS1.I1.C3119						MC20.MG7.AS1.I9.R17299		MC20.MG21.AS1.I19.R55973							MC20.MG31.AS1.I1.C17163	MC20.MG30.AS1.I1.C1607			MC20.MG22.AS1.I22.R20687	MC20.MG23.AS1.I1.C1497	MC20.MG24.AS1.I1.C2374	MC20.MG25.AS1.I16.R14963			MC20.MG28.AS1.I17.R16294	MC20.MG37.AS1.I1.C8366				MC20.MG36.AS1.I1.C16173
MC20.MG16.AS1.I14.R40556		MC20.MG18.AS1.I11.R36796				MC20.MG20.AS1.I1.C3125						MC20.MG7.AS1.I9.R1738		MC20.MG21.AS1.I19.R56368							MC20.MG31.AS1.I1.C17168	MC20.MG30.AS1.I1.C16077			MC20.MG22.AS1.I22.R20736	MC20.MG23.AS1.I1.C1498	MC20.MG24.AS1.I1.C2375	MC20.MG25.AS1.I16.R15008			MC20.MG28.AS1.I17.R1631	MC20.MG37.AS1.I1.C8399				MC20.MG36.AS1.I1.C16345
MC20.MG16.AS1.I14.R40748		MC20.MG18.AS1.I11.R36899				MC20.MG20.AS1.I1.C3141						MC20.MG7.AS1.I9.R17600		MC20.MG21.AS1.I19.R56532							MC20.MG31.AS1.I1.C17180	MC20.MG30.AS1.I1.C1608			MC20.MG22.AS1.I22.R20842	MC20.MG23.AS1.I1.C150	MC20.MG24.AS1.I1.C2424	MC20.MG25.AS1.I16.R15264			MC20.MG28.AS1.I17.R16382	MC20.MG37.AS1.I1.C8456				MC20.MG36.AS1.I1.C16371
MC20.MG16.AS1.I14.R40813		MC20.MG18.AS1.I11.R37021				MC20.MG20.AS1.I1.C3169						MC20.MG7.AS1.I9.R17616		MC20.MG21.AS1.I19.R56534							MC20.MG31.AS1.I1.C1719	MC20.MG30.AS1.I1.C1609			MC20.MG22.AS1.I22.R2088	MC20.MG23.AS1.I1.C151	MC20.MG24.AS1.I1.C2425	MC20.MG25.AS1.I16.R15326			MC20.MG28.AS1.I17.R16447	MC20.MG37.AS1.I1.C8461				MC20.MG36.AS1.I1.C1641
MC20.MG16.AS1.I14.R40857		MC20.MG18.AS1.I11.R37532				MC20.MG20.AS1.I1.C3178						MC20.MG7.AS1.I9.R17798		MC20.MG21.AS1.I19.R57103							MC20.MG31.AS1.I1.C1720	MC20.MG30.AS1.I1.C1610			MC20.MG22.AS1.I22.R20974	MC20.MG23.AS1.I1.C152	MC20.MG24.AS1.I1.C2426	MC20.MG25.AS1.I16.R15431			MC20.MG28.AS1.I17.R16544	MC20.MG37.AS1.I1.C8465				MC20.MG36.AS1.I1.C1642
MC20.MG16.AS1.I14.R41173		MC20.MG18.AS1.I11.R37772				MC20.MG20.AS1.I1.C3234						MC20.MG7.AS1.I9.R17891		MC20.MG21.AS1.I19.R57628							MC20.MG31.AS1.I1.C17206	MC20.MG30.AS1.I1.C1611			MC20.MG22.AS1.I22.R21107	MC20.MG23.AS1.I1.C1523	MC20.MG24.AS1.I1.C2555	MC20.MG25.AS1.I16.R15443			MC20.MG28.AS1.I17.R16568	MC20.MG37.AS1.I1.C8483				MC20.MG36.AS1.I1.C1643
MC20.MG16.AS1.I14.R41464		MC20.MG18.AS1.I11.R3783				MC20.MG20.AS1.I1.C3239						MC20.MG7.AS1.I9.R17992		MC20.MG21.AS1.I19.R57662							MC20.MG31.AS1.I1.C1721	MC20.MG30.AS1.I1.C16192			MC20.MG22.AS1.I22.R21176	MC20.MG23.AS1.I1.C1524	MC20.MG24.AS1.I1.C2556	MC20.MG25.AS1.I16.R15777			MC20.MG28.AS1.I17.R16575	MC20.MG37.AS1.I1.C8486				MC20.MG36.AS1.I1.C1644
MC20.MG16.AS1.I14.R41467		MC20.MG18.AS1.I11.R37871				MC20.MG20.AS1.I1.C3257						MC20.MG7.AS1.I9.R17993		MC20.MG21.AS1.I19.R5772							MC20.MG31.AS1.I1.C1722	MC20.MG30.AS1.I1.C1623			MC20.MG22.AS1.I22.R2131	MC20.MG23.AS1.I1.C1525	MC20.MG24.AS1.I1.C2557	MC20.MG25.AS1.I16.R15990			MC20.MG28.AS1.I17.R16715	MC20.MG37.AS1.I1.C8499				MC20.MG36.AS1.I1.C1645
MC20.MG16.AS1.I14.R41556		MC20.MG18.AS1.I11.R38238				MC20.MG20.AS1.I1.C3276						MC20.MG7.AS1.I9.R17999		MC20.MG21.AS1.I19.R57837							MC20.MG31.AS1.I1.C1723	MC20.MG30.AS1.I1.C1624			MC20.MG22.AS1.I22.R21448	MC20.MG23.AS1.I1.C153	MC20.MG24.AS1.I1.C2565	MC20.MG25.AS1.I16.R16141			MC20.MG28.AS1.I17.R16791	MC20.MG37.AS1.I1.C8577				MC20.MG36.AS1.I1.C1646
MC20.MG16.AS1.I14.R41583		MC20.MG18.AS1.I11.R38412				MC20.MG20.AS1.I1.C3293						MC20.MG7.AS1.I9.R18000		MC20.MG21.AS1.I19.R57965							MC20.MG31.AS1.I1.C1728	MC20.MG30.AS1.I1.C1625			MC20.MG22.AS1.I22.R21728	MC20.MG23.AS1.I1.C1534	MC20.MG24.AS1.I1.C2566	MC20.MG25.AS1.I16.R16167			MC20.MG28.AS1.I17.R17082	MC20.MG37.AS1.I1.C8586				MC20.MG36.AS1.I1.C16500
MC20.MG16.AS1.I14.R41588		MC20.MG18.AS1.I11.R38517				MC20.MG20.AS1.I1.C3298						MC20.MG7.AS1.I9.R18441		MC20.MG21.AS1.I19.R58137							MC20.MG31.AS1.I1.C1729	MC20.MG30.AS1.I1.C1626			MC20.MG22.AS1.I22.R21806	MC20.MG23.AS1.I1.C1535	MC20.MG24.AS1.I1.C2578	MC20.MG25.AS1.I16.R16195			MC20.MG28.AS1.I17.R17094	MC20.MG37.AS1.I1.C8628				MC20.MG36.AS1.I1.C16704
MC20.MG16.AS1.I14.R41656		MC20.MG18.AS1.I11.R38524				MC20.MG20.AS1.I1.C3309						MC20.MG7.AS1.I9.R18442		MC20.MG21.AS1.I19.R59500							MC20.MG31.AS1.I1.C1730	MC20.MG30.AS1.I1.C1627			MC20.MG22.AS1.I22.R22165	MC20.MG23.AS1.I1.C1539	MC20.MG24.AS1.I1.C2580	MC20.MG25.AS1.I16.R16372			MC20.MG28.AS1.I17.R17114	MC20.MG37.AS1.I1.C8645				MC20.MG36.AS1.I1.C16723
MC20.MG16.AS1.I14.R4171		MC20.MG18.AS1.I11.R38561				MC20.MG20.AS1.I1.C3310						MC20.MG7.AS1.I9.R1881		MC20.MG21.AS1.I19.R59814							MC20.MG31.AS1.I1.C17303	MC20.MG30.AS1.I1.C1628			MC20.MG22.AS1.I22.R22282	MC20.MG23.AS1.I1.C154	MC20.MG24.AS1.I1.C2583	MC20.MG25.AS1.I16.R16457			MC20.MG28.AS1.I17.R1715	MC20.MG37.AS1.I1.C8669				MC20.MG36.AS1.I1.C16852
MC20.MG16.AS1.I14.R41837		MC20.MG18.AS1.I11.R38597				MC20.MG20.AS1.I1.C3329						MC20.MG7.AS1.I9.R1882		MC20.MG21.AS1.I19.R59975							MC20.MG31.AS1.I1.C1731	MC20.MG30.AS1.I1.C16293			MC20.MG22.AS1.I22.R22381	MC20.MG23.AS1.I1.C1540	MC20.MG24.AS1.I1.C2584	MC20.MG25.AS1.I16.R16546			MC20.MG28.AS1.I17.R1718	MC20.MG37.AS1.I1.C8675				MC20.MG36.AS1.I1.C1688
MC20.MG16.AS1.I14.R41841		MC20.MG18.AS1.I11.R38742				MC20.MG20.AS1.I1.C3351						MC20.MG7.AS1.I9.R1893		MC20.MG21.AS1.I19.R60161							MC20.MG31.AS1.I1.C1732	MC20.MG30.AS1.I1.C16367			MC20.MG22.AS1.I22.R22504	MC20.MG23.AS1.I1.C1541	MC20.MG24.AS1.I1.C2585	MC20.MG25.AS1.I16.R16578			MC20.MG28.AS1.I17.R17213	MC20.MG37.AS1.I1.C8687				MC20.MG36.AS1.I1.C1689
MC20.MG16.AS1.I14.R42037		MC20.MG18.AS1.I11.R38819				MC20.MG20.AS1.I1.C3353						MC20.MG7.AS1.I9.R1894		MC20.MG21.AS1.I19.R60506							MC20.MG31.AS1.I1.C17346	MC20.MG30.AS1.I1.C164			MC20.MG22.AS1.I22.R22807	MC20.MG23.AS1.I1.C1542	MC20.MG24.AS1.I1.C2587	MC20.MG25.AS1.I16.R16696			MC20.MG28.AS1.I17.R17228	MC20.MG37.AS1.I1.C8719				MC20.MG36.AS1.I1.C1690
MC20.MG16.AS1.I14.R42272		MC20.MG18.AS1.I11.R38838				MC20.MG20.AS1.I1.C3356						MC20.MG7.AS1.I9.R1956		MC20.MG21.AS1.I19.R6106							MC20.MG31.AS1.I1.C17351	MC20.MG30.AS1.I1.C16404			MC20.MG22.AS1.I22.R23	MC20.MG23.AS1.I1.C155	MC20.MG24.AS1.I1.C2588	MC20.MG25.AS1.I16.R16795			MC20.MG28.AS1.I17.R17259	MC20.MG37.AS1.I1.C8749				MC20.MG36.AS1.I1.C1691
MC20.MG16.AS1.I14.R42369		MC20.MG18.AS1.I11.R38952				MC20.MG20.AS1.I1.C3422						MC20.MG7.AS1.I9.R1957		MC20.MG21.AS1.I19.R61344							MC20.MG31.AS1.I1.C1736	MC20.MG30.AS1.I1.C16428			MC20.MG22.AS1.I22.R23058	MC20.MG23.AS1.I1.C156	MC20.MG24.AS1.I1.C2589	MC20.MG25.AS1.I16.R16890			MC20.MG28.AS1.I17.R175	MC20.MG37.AS1.I1.C8757				MC20.MG36.AS1.I1.C16926
MC20.MG16.AS1.I14.R42410		MC20.MG18.AS1.I11.R3905				MC20.MG20.AS1.I1.C3429						MC20.MG7.AS1.I9.R2		MC20.MG21.AS1.I19.R61498							MC20.MG31.AS1.I1.C1737	MC20.MG30.AS1.I1.C16442			MC20.MG22.AS1.I22.R2328	MC20.MG23.AS1.I1.C157	MC20.MG24.AS1.I1.C2656	MC20.MG25.AS1.I16.R169			MC20.MG28.AS1.I17.R17533	MC20.MG37.AS1.I1.C8847				MC20.MG36.AS1.I1.C16946
MC20.MG16.AS1.I14.R42587		MC20.MG18.AS1.I11.R39178				MC20.MG20.AS1.I1.C3450						MC20.MG7.AS1.I9.R2030		MC20.MG21.AS1.I19.R61561							MC20.MG31.AS1.I1.C1738	MC20.MG30.AS1.I1.C165			MC20.MG22.AS1.I22.R23425	MC20.MG23.AS1.I1.C158	MC20.MG24.AS1.I1.C2657	MC20.MG25.AS1.I16.R17207			MC20.MG28.AS1.I17.R17592	MC20.MG37.AS1.I1.C8921				MC20.MG36.AS1.I1.C17029
MC20.MG16.AS1.I14.R42741		MC20.MG18.AS1.I11.R39194				MC20.MG20.AS1.I1.C3456						MC20.MG7.AS1.I9.R2031		MC20.MG21.AS1.I19.R6594							MC20.MG31.AS1.I1.C1739	MC20.MG30.AS1.I1.C16505			MC20.MG22.AS1.I22.R23474	MC20.MG23.AS1.I1.C1583	MC20.MG24.AS1.I1.C2658	MC20.MG25.AS1.I16.R1721			MC20.MG28.AS1.I17.R17655	MC20.MG37.AS1.I1.C8946				MC20.MG36.AS1.I1.C17296
MC20.MG16.AS1.I14.R42869		MC20.MG18.AS1.I11.R39358				MC20.MG20.AS1.I1.C3458						MC20.MG7.AS1.I9.R2049		MC20.MG21.AS1.I19.R6611							MC20.MG31.AS1.I1.C17399	MC20.MG30.AS1.I1.C1653			MC20.MG22.AS1.I22.R23509	MC20.MG23.AS1.I1.C1584	MC20.MG24.AS1.I1.C2672	MC20.MG25.AS1.I16.R17286			MC20.MG28.AS1.I17.R17753	MC20.MG37.AS1.I1.C8954				MC20.MG36.AS1.I1.C17347
MC20.MG16.AS1.I14.R42903		MC20.MG18.AS1.I11.R39469				MC20.MG20.AS1.I1.C3464						MC20.MG7.AS1.I9.R2274		MC20.MG21.AS1.I19.R6765							MC20.MG31.AS1.I1.C1740	MC20.MG30.AS1.I1.C1654			MC20.MG22.AS1.I22.R23554	MC20.MG23.AS1.I1.C1587	MC20.MG24.AS1.I1.C2673	MC20.MG25.AS1.I16.R1737			MC20.MG28.AS1.I17.R17778	MC20.MG37.AS1.I1.C9050				MC20.MG36.AS1.I1.C17482
MC20.MG16.AS1.I14.R42999		MC20.MG18.AS1.I11.R39529				MC20.MG20.AS1.I1.C3532						MC20.MG7.AS1.I9.R2275		MC20.MG21.AS1.I19.R7004							MC20.MG31.AS1.I1.C17438	MC20.MG30.AS1.I1.C1655			MC20.MG22.AS1.I22.R23573	MC20.MG23.AS1.I1.C1588	MC20.MG24.AS1.I1.C2674	MC20.MG25.AS1.I16.R17380			MC20.MG28.AS1.I17.R17833	MC20.MG37.AS1.I1.C9094				MC20.MG36.AS1.I1.C17606
MC20.MG16.AS1.I14.R43058		MC20.MG18.AS1.I11.R39737				MC20.MG20.AS1.I1.C3536						MC20.MG7.AS1.I9.R2327		MC20.MG21.AS1.I19.R711							MC20.MG31.AS1.I1.C17504	MC20.MG30.AS1.I1.C1656			MC20.MG22.AS1.I22.R23598	MC20.MG23.AS1.I1.C159	MC20.MG24.AS1.I1.C2688	MC20.MG25.AS1.I16.R17490			MC20.MG28.AS1.I17.R17889	MC20.MG37.AS1.I1.C9120				MC20.MG36.AS1.I1.C17703
MC20.MG16.AS1.I14.R43448		MC20.MG18.AS1.I11.R39793				MC20.MG20.AS1.I1.C3566						MC20.MG7.AS1.I9.R2328		MC20.MG21.AS1.I19.R7146							MC20.MG31.AS1.I1.C17505	MC20.MG30.AS1.I1.C166			MC20.MG22.AS1.I22.R23764	MC20.MG23.AS1.I1.C1597	MC20.MG24.AS1.I1.C2722	MC20.MG25.AS1.I16.R17509			MC20.MG28.AS1.I17.R179	MC20.MG37.AS1.I1.C9282				MC20.MG36.AS1.I1.C17712
MC20.MG16.AS1.I14.R5021		MC20.MG18.AS1.I11.R39992				MC20.MG20.AS1.I1.C3612						MC20.MG7.AS1.I9.R2348		MC20.MG21.AS1.I19.R7248							MC20.MG31.AS1.I1.C1751	MC20.MG30.AS1.I1.C16656			MC20.MG22.AS1.I22.R23841	MC20.MG23.AS1.I1.C1598	MC20.MG24.AS1.I1.C2723	MC20.MG25.AS1.I16.R17676			MC20.MG28.AS1.I17.R17952	MC20.MG37.AS1.I1.C9297				MC20.MG36.AS1.I1.C1776
MC20.MG16.AS1.I14.R5184		MC20.MG18.AS1.I11.R40042				MC20.MG20.AS1.I1.C3625						MC20.MG7.AS1.I9.R2573		MC20.MG21.AS1.I19.R7639							MC20.MG31.AS1.I1.C1752	MC20.MG30.AS1.I1.C167			MC20.MG22.AS1.I22.R24072	MC20.MG23.AS1.I1.C1599	MC20.MG24.AS1.I1.C2743	MC20.MG25.AS1.I16.R177			MC20.MG28.AS1.I17.R17968	MC20.MG37.AS1.I1.C9312				MC20.MG36.AS1.I1.C1777
MC20.MG16.AS1.I14.R5239		MC20.MG18.AS1.I11.R40057				MC20.MG20.AS1.I1.C3654						MC20.MG7.AS1.I9.R2574		MC20.MG21.AS1.I19.R8011							MC20.MG31.AS1.I1.C17521	MC20.MG30.AS1.I1.C1672			MC20.MG22.AS1.I22.R241	MC20.MG23.AS1.I1.C1600	MC20.MG24.AS1.I1.C2744	MC20.MG25.AS1.I16.R1783			MC20.MG28.AS1.I17.R17970	MC20.MG37.AS1.I1.C9317				MC20.MG36.AS1.I1.C1778
MC20.MG16.AS1.I14.R524		MC20.MG18.AS1.I11.R40164				MC20.MG20.AS1.I1.C3657						MC20.MG7.AS1.I9.R2579		MC20.MG21.AS1.I19.R8062							MC20.MG31.AS1.I1.C1753	MC20.MG30.AS1.I1.C1673			MC20.MG22.AS1.I22.R24161	MC20.MG23.AS1.I1.C1601	MC20.MG24.AS1.I1.C2745	MC20.MG25.AS1.I16.R17875			MC20.MG28.AS1.I17.R18106	MC20.MG37.AS1.I1.C9346				MC20.MG36.AS1.I1.C1779
MC20.MG16.AS1.I14.R5392		MC20.MG18.AS1.I11.R40311				MC20.MG20.AS1.I1.C3659						MC20.MG7.AS1.I9.R2648		MC20.MG21.AS1.I19.R8131							MC20.MG31.AS1.I1.C1754	MC20.MG30.AS1.I1.C1674			MC20.MG22.AS1.I22.R24173	MC20.MG23.AS1.I1.C1602	MC20.MG24.AS1.I1.C2811	MC20.MG25.AS1.I16.R17940			MC20.MG28.AS1.I17.R18164	MC20.MG37.AS1.I1.C9364				MC20.MG36.AS1.I1.C1780
MC20.MG16.AS1.I14.R541		MC20.MG18.AS1.I11.R40404				MC20.MG20.AS1.I1.C3665						MC20.MG7.AS1.I9.R27		MC20.MG21.AS1.I19.R8174							MC20.MG31.AS1.I1.C17570	MC20.MG30.AS1.I1.C1675			MC20.MG22.AS1.I22.R24230	MC20.MG23.AS1.I1.C1603	MC20.MG24.AS1.I1.C2812	MC20.MG25.AS1.I16.R18242			MC20.MG28.AS1.I17.R18210	MC20.MG37.AS1.I1.C9390				MC20.MG36.AS1.I1.C1781
MC20.MG16.AS1.I14.R5928		MC20.MG18.AS1.I11.R40439				MC20.MG20.AS1.I1.C3675						MC20.MG7.AS1.I9.R275		MC20.MG21.AS1.I19.R8245							MC20.MG31.AS1.I1.C17580	MC20.MG30.AS1.I1.C1676			MC20.MG22.AS1.I22.R24289	MC20.MG23.AS1.I1.C1604	MC20.MG24.AS1.I1.C2813	MC20.MG25.AS1.I16.R18459			MC20.MG28.AS1.I17.R18274	MC20.MG37.AS1.I1.C9406				MC20.MG36.AS1.I1.C17856
MC20.MG16.AS1.I14.R6330		MC20.MG18.AS1.I11.R40489				MC20.MG20.AS1.I1.C3680						MC20.MG7.AS1.I9.R276		MC20.MG21.AS1.I19.R8275							MC20.MG31.AS1.I1.C17628	MC20.MG30.AS1.I1.C168			MC20.MG22.AS1.I22.R24327	MC20.MG23.AS1.I1.C1605	MC20.MG24.AS1.I1.C2814	MC20.MG25.AS1.I16.R18613			MC20.MG28.AS1.I17.R184	MC20.MG37.AS1.I1.C9422				MC20.MG36.AS1.I1.C17899
MC20.MG16.AS1.I14.R6388		MC20.MG18.AS1.I11.R40500				MC20.MG20.AS1.I1.C3681						MC20.MG7.AS1.I9.R2813		MC20.MG21.AS1.I19.R8332							MC20.MG31.AS1.I1.C17666	MC20.MG30.AS1.I1.C16804			MC20.MG22.AS1.I22.R24443	MC20.MG23.AS1.I1.C1614	MC20.MG24.AS1.I1.C2837	MC20.MG25.AS1.I16.R18631			MC20.MG28.AS1.I17.R18418	MC20.MG37.AS1.I1.C9515				MC20.MG36.AS1.I1.C17905
MC20.MG16.AS1.I14.R6947		MC20.MG18.AS1.I11.R40633				MC20.MG20.AS1.I1.C3698						MC20.MG7.AS1.I9.R2818		MC20.MG21.AS1.I19.R8394							MC20.MG31.AS1.I1.C17669	MC20.MG30.AS1.I1.C169			MC20.MG22.AS1.I22.R24491	MC20.MG23.AS1.I1.C1615	MC20.MG24.AS1.I1.C2838	MC20.MG25.AS1.I16.R18727			MC20.MG28.AS1.I17.R1844	MC20.MG37.AS1.I1.C9522				MC20.MG36.AS1.I1.C17983
MC20.MG16.AS1.I14.R7116		MC20.MG18.AS1.I11.R40818				MC20.MG20.AS1.I1.C3700						MC20.MG7.AS1.I9.R2819		MC20.MG21.AS1.I19.R855							MC20.MG31.AS1.I1.C17696	MC20.MG30.AS1.I1.C1697			MC20.MG22.AS1.I22.R24610	MC20.MG23.AS1.I1.C1622	MC20.MG24.AS1.I1.C2874	MC20.MG25.AS1.I16.R18841			MC20.MG28.AS1.I17.R18511	MC20.MG37.AS1.I1.C9528				MC20.MG36.AS1.I1.C1801
MC20.MG16.AS1.I14.R7171		MC20.MG18.AS1.I11.R4116				MC20.MG20.AS1.I1.C3712						MC20.MG7.AS1.I9.R3		MC20.MG21.AS1.I19.R8561							MC20.MG31.AS1.I1.C17700	MC20.MG30.AS1.I1.C1698			MC20.MG22.AS1.I22.R24618	MC20.MG23.AS1.I1.C1623	MC20.MG24.AS1.I1.C2875	MC20.MG25.AS1.I16.R19046			MC20.MG28.AS1.I17.R18599	MC20.MG37.AS1.I1.C9530				MC20.MG36.AS1.I1.C18011
MC20.MG16.AS1.I14.R8607		MC20.MG18.AS1.I11.R41272				MC20.MG20.AS1.I1.C3713						MC20.MG7.AS1.I9.R3019		MC20.MG21.AS1.I19.R8660							MC20.MG31.AS1.I1.C17748	MC20.MG30.AS1.I1.C1699			MC20.MG22.AS1.I22.R24725	MC20.MG23.AS1.I1.C1624	MC20.MG24.AS1.I1.C2876	MC20.MG25.AS1.I16.R1920			MC20.MG28.AS1.I17.R18661	MC20.MG37.AS1.I1.C9537				MC20.MG36.AS1.I1.C18015
MC20.MG16.AS1.I14.R9041		MC20.MG18.AS1.I11.R41370				MC20.MG20.AS1.I1.C3718						MC20.MG7.AS1.I9.R3020		MC20.MG21.AS1.I19.R8728							MC20.MG31.AS1.I1.C1776	MC20.MG30.AS1.I1.C170			MC20.MG22.AS1.I22.R24731	MC20.MG23.AS1.I1.C1651	MC20.MG24.AS1.I1.C2902	MC20.MG25.AS1.I16.R19248			MC20.MG28.AS1.I17.R18735	MC20.MG37.AS1.I1.C9576				MC20.MG36.AS1.I1.C1802
MC20.MG16.AS1.I14.R9089		MC20.MG18.AS1.I11.R41430				MC20.MG20.AS1.I1.C3785						MC20.MG7.AS1.I9.R3025		MC20.MG21.AS1.I19.R8992							MC20.MG31.AS1.I1.C1777	MC20.MG30.AS1.I1.C171			MC20.MG22.AS1.I22.R24861	MC20.MG23.AS1.I1.C1652	MC20.MG24.AS1.I1.C2903	MC20.MG25.AS1.I16.R19419			MC20.MG28.AS1.I17.R18984	MC20.MG37.AS1.I1.C9579				MC20.MG36.AS1.I1.C1803
MC20.MG16.AS1.I14.R9122		MC20.MG18.AS1.I11.R41526				MC20.MG20.AS1.I1.C3803						MC20.MG7.AS1.I9.R3124		MC20.MG21.AS1.I19.R9056							MC20.MG31.AS1.I1.C1778	MC20.MG30.AS1.I1.C172			MC20.MG22.AS1.I22.R24889	MC20.MG23.AS1.I1.C1653	MC20.MG24.AS1.I1.C2930	MC20.MG25.AS1.I16.R19429			MC20.MG28.AS1.I17.R18986	MC20.MG37.AS1.I1.C9596				MC20.MG36.AS1.I1.C1804
MC20.MG16.AS1.I14.R9166		MC20.MG18.AS1.I11.R41600				MC20.MG20.AS1.I1.C3844						MC20.MG7.AS1.I9.R3125		MC20.MG21.AS1.I19.R9363							MC20.MG31.AS1.I1.C17784	MC20.MG30.AS1.I1.C173			MC20.MG22.AS1.I22.R24974	MC20.MG23.AS1.I1.C1654	MC20.MG24.AS1.I1.C2931	MC20.MG25.AS1.I16.R19477			MC20.MG28.AS1.I17.R19036	MC20.MG37.AS1.I1.C9650				MC20.MG36.AS1.I1.C1805
MC20.MG16.AS1.I14.R9370		MC20.MG18.AS1.I11.R4166				MC20.MG20.AS1.I1.C3847						MC20.MG7.AS1.I9.R3299		MC20.MG21.AS1.I19.R9368							MC20.MG31.AS1.I1.C1779	MC20.MG30.AS1.I1.C1739			MC20.MG22.AS1.I22.R25031	MC20.MG23.AS1.I1.C1662	MC20.MG24.AS1.I1.C2958	MC20.MG25.AS1.I16.R19527			MC20.MG28.AS1.I17.R19152	MC20.MG37.AS1.I1.C9700				MC20.MG36.AS1.I1.C1806
MC20.MG16.AS1.I14.R9608		MC20.MG18.AS1.I11.R41751				MC20.MG20.AS1.I1.C3901						MC20.MG7.AS1.I9.R3300		MC20.MG21.AS1.I19.R9384							MC20.MG31.AS1.I1.C1780	MC20.MG30.AS1.I1.C174			MC20.MG22.AS1.I22.R25144	MC20.MG23.AS1.I1.C1663	MC20.MG24.AS1.I1.C2959	MC20.MG25.AS1.I16.R1954			MC20.MG28.AS1.I17.R19383	MC20.MG37.AS1.I1.C9711				MC20.MG36.AS1.I1.C18067
MC20.MG16.AS1.I14.R9672		MC20.MG18.AS1.I11.R41775				MC20.MG20.AS1.I1.C3916						MC20.MG7.AS1.I9.R3331		MC20.MG21.AS1.I19.R9400							MC20.MG31.AS1.I1.C17800	MC20.MG30.AS1.I1.C1740			MC20.MG22.AS1.I22.R25236	MC20.MG23.AS1.I1.C1696	MC20.MG24.AS1.I1.C2979	MC20.MG25.AS1.I16.R19621			MC20.MG28.AS1.I17.R19414	MC20.MG37.AS1.I1.C9742				MC20.MG36.AS1.I1.C1807
MC20.MG16.AS1.I14.R9746		MC20.MG18.AS1.I11.R41799				MC20.MG20.AS1.I1.C3933						MC20.MG7.AS1.I9.R3332		MC20.MG21.AS1.I19.R9737							MC20.MG31.AS1.I1.C17821	MC20.MG30.AS1.I1.C1741			MC20.MG22.AS1.I22.R25355	MC20.MG23.AS1.I1.C1706	MC20.MG24.AS1.I1.C2980	MC20.MG25.AS1.I16.R19803			MC20.MG28.AS1.I17.R19435	MC20.MG37.AS1.I1.C9797				MC20.MG36.AS1.I1.C1808
MC20.MG16.AS1.I14.R9751		MC20.MG18.AS1.I11.R41894				MC20.MG20.AS1.I1.C3945						MC20.MG7.AS1.I9.R3653									MC20.MG31.AS1.I1.C17832	MC20.MG30.AS1.I1.C1742			MC20.MG22.AS1.I22.R25448	MC20.MG23.AS1.I1.C1707	MC20.MG24.AS1.I1.C2995	MC20.MG25.AS1.I16.R19817			MC20.MG28.AS1.I17.R19486	MC20.MG37.AS1.I1.C9861				MC20.MG36.AS1.I1.C1809
MC20.MG16.AS1.I14.R9938		MC20.MG18.AS1.I11.R4217				MC20.MG20.AS1.I1.C3953						MC20.MG7.AS1.I9.R3654									MC20.MG31.AS1.I1.C17839	MC20.MG30.AS1.I1.C1743			MC20.MG22.AS1.I22.R2551	MC20.MG23.AS1.I1.C1708	MC20.MG24.AS1.I1.C3052	MC20.MG25.AS1.I16.R19822			MC20.MG28.AS1.I17.R19496	MC20.MG37.AS1.I1.C9954				MC20.MG36.AS1.I1.C18125
MC20.MG16.AS1.I9.C123		MC20.MG18.AS1.I11.R42677				MC20.MG20.AS1.I1.C3959						MC20.MG7.AS1.I9.R378									MC20.MG31.AS1.I1.C17843	MC20.MG30.AS1.I1.C1744			MC20.MG22.AS1.I22.R25548	MC20.MG23.AS1.I1.C1766	MC20.MG24.AS1.I1.C3053	MC20.MG25.AS1.I16.R19858			MC20.MG28.AS1.I17.R19505	MC20.MG37.AS1.I1.C9957				MC20.MG36.AS1.I1.C18141
MC20.MG16.AS1.I9.C124		MC20.MG18.AS1.I11.R42768				MC20.MG20.AS1.I1.C3968						MC20.MG7.AS1.I9.R379									MC20.MG31.AS1.I1.C17925	MC20.MG30.AS1.I1.C1749			MC20.MG22.AS1.I22.R25628	MC20.MG23.AS1.I1.C1768	MC20.MG24.AS1.I1.C3078	MC20.MG25.AS1.I16.R19960			MC20.MG28.AS1.I17.R19548	MC20.MG37.AS1.I1.C9963				MC20.MG36.AS1.I1.C18144
MC20.MG16.AS1.I9.C17		MC20.MG18.AS1.I11.R42977				MC20.MG20.AS1.I1.C3982						MC20.MG7.AS1.I9.R3884									MC20.MG31.AS1.I1.C17943	MC20.MG30.AS1.I1.C175			MC20.MG22.AS1.I22.R25634	MC20.MG23.AS1.I1.C1772	MC20.MG24.AS1.I1.C3080	MC20.MG25.AS1.I16.R20199			MC20.MG28.AS1.I17.R19817	MC20.MG37.AS1.I1.C9977				MC20.MG36.AS1.I1.C18194
MC20.MG16.AS1.I9.C452		MC20.MG18.AS1.I11.R42990				MC20.MG20.AS1.I1.C3990						MC20.MG7.AS1.I9.R391									MC20.MG31.AS1.I1.C17948	MC20.MG30.AS1.I1.C1750			MC20.MG22.AS1.I22.R25641	MC20.MG23.AS1.I1.C1788	MC20.MG24.AS1.I1.C3086	MC20.MG25.AS1.I16.R20232			MC20.MG28.AS1.I17.R19839	MC20.MG37.AS1.I1.C9993				MC20.MG36.AS1.I1.C18257
MC20.MG16.AS1.I9.C457		MC20.MG18.AS1.I11.R43066				MC20.MG20.AS1.I1.C4080						MC20.MG7.AS1.I9.R4184									MC20.MG31.AS1.I1.C17956	MC20.MG30.AS1.I1.C1751			MC20.MG22.AS1.I22.R25752	MC20.MG23.AS1.I1.C1789	MC20.MG24.AS1.I1.C3087	MC20.MG25.AS1.I16.R20429			MC20.MG28.AS1.I17.R20109	MC20.MG37.AS1.I19.C239				MC20.MG36.AS1.I1.C18270
MC20.MG16.AS1.I9.C95		MC20.MG18.AS1.I11.R4312				MC20.MG20.AS1.I1.C4087						MC20.MG7.AS1.I9.R4185									MC20.MG31.AS1.I1.C17957	MC20.MG30.AS1.I1.C1752			MC20.MG22.AS1.I22.R25758	MC20.MG23.AS1.I1.C1793	MC20.MG24.AS1.I1.C3093	MC20.MG25.AS1.I16.R20659			MC20.MG28.AS1.I17.R20119	MC20.MG37.AS1.I19.C240				MC20.MG36.AS1.I1.C18387
		MC20.MG18.AS1.I11.R43243				MC20.MG20.AS1.I1.C4089						MC20.MG7.AS1.I9.R4322									MC20.MG31.AS1.I1.C17977	MC20.MG30.AS1.I1.C1753			MC20.MG22.AS1.I22.R26058	MC20.MG23.AS1.I1.C1794	MC20.MG24.AS1.I1.C3094	MC20.MG25.AS1.I16.R20827			MC20.MG28.AS1.I17.R20130	MC20.MG37.AS1.I19.C29				MC20.MG36.AS1.I1.C18574
		MC20.MG18.AS1.I11.R43513				MC20.MG20.AS1.I1.C4099						MC20.MG7.AS1.I9.R4352									MC20.MG31.AS1.I1.C17988	MC20.MG30.AS1.I1.C1754			MC20.MG22.AS1.I22.R26070	MC20.MG23.AS1.I1.C1795	MC20.MG24.AS1.I1.C3095	MC20.MG25.AS1.I16.R20940			MC20.MG28.AS1.I17.R20274	MC20.MG37.AS1.I19.C30				MC20.MG36.AS1.I1.C18591
		MC20.MG18.AS1.I11.R43546				MC20.MG20.AS1.I1.C4103						MC20.MG7.AS1.I9.R4353									MC20.MG31.AS1.I1.C18031	MC20.MG30.AS1.I1.C1755			MC20.MG22.AS1.I22.R26393	MC20.MG23.AS1.I1.C1848	MC20.MG24.AS1.I1.C3162	MC20.MG25.AS1.I16.R21034			MC20.MG28.AS1.I17.R20318	MC20.MG37.AS1.I19.C387				MC20.MG36.AS1.I1.C18592
		MC20.MG18.AS1.I11.R43592				MC20.MG20.AS1.I1.C4105						MC20.MG7.AS1.I9.R4441									MC20.MG31.AS1.I1.C18039	MC20.MG30.AS1.I1.C1756			MC20.MG22.AS1.I22.R26493	MC20.MG23.AS1.I1.C1849	MC20.MG24.AS1.I1.C3163	MC20.MG25.AS1.I16.R21053			MC20.MG28.AS1.I17.R20414	MC20.MG37.AS1.I19.C388				MC20.MG36.AS1.I1.C18708
		MC20.MG18.AS1.I11.R43613				MC20.MG20.AS1.I1.C4118						MC20.MG7.AS1.I9.R4443									MC20.MG31.AS1.I1.C18065	MC20.MG30.AS1.I1.C1757			MC20.MG22.AS1.I22.R26802	MC20.MG23.AS1.I1.C1853	MC20.MG24.AS1.I1.C3168	MC20.MG25.AS1.I16.R21066			MC20.MG28.AS1.I17.R20419	MC20.MG37.AS1.I19.C41				MC20.MG36.AS1.I1.C1882
		MC20.MG18.AS1.I11.R43735				MC20.MG20.AS1.I1.C4124						MC20.MG7.AS1.I9.R4466									MC20.MG31.AS1.I1.C18110	MC20.MG30.AS1.I1.C1758			MC20.MG22.AS1.I22.R26923	MC20.MG23.AS1.I1.C1854	MC20.MG24.AS1.I1.C3169	MC20.MG25.AS1.I16.R21102			MC20.MG28.AS1.I17.R20626	MC20.MG37.AS1.I19.C42				MC20.MG36.AS1.I1.C1883
		MC20.MG18.AS1.I11.R43748				MC20.MG20.AS1.I1.C4140						MC20.MG7.AS1.I9.R4554									MC20.MG31.AS1.I1.C18115	MC20.MG30.AS1.I1.C1759			MC20.MG22.AS1.I22.R26942	MC20.MG23.AS1.I1.C1855	MC20.MG24.AS1.I1.C3174	MC20.MG25.AS1.I16.R21302			MC20.MG28.AS1.I17.R2069	MC20.MG37.AS1.I19.C461				MC20.MG36.AS1.I1.C1884
		MC20.MG18.AS1.I11.R43778				MC20.MG20.AS1.I1.C4144						MC20.MG7.AS1.I9.R4555									MC20.MG31.AS1.I1.C18120	MC20.MG30.AS1.I1.C176			MC20.MG22.AS1.I22.R27291	MC20.MG23.AS1.I1.C1856	MC20.MG24.AS1.I1.C3175	MC20.MG25.AS1.I16.R21399			MC20.MG28.AS1.I17.R2077	MC20.MG37.AS1.I19.C462				MC20.MG36.AS1.I1.C1885
		MC20.MG18.AS1.I11.R43946				MC20.MG20.AS1.I1.C4172						MC20.MG7.AS1.I9.R47									MC20.MG31.AS1.I1.C18159	MC20.MG30.AS1.I1.C1760			MC20.MG22.AS1.I22.R27521	MC20.MG23.AS1.I1.C1890	MC20.MG24.AS1.I1.C3193	MC20.MG25.AS1.I16.R2145			MC20.MG28.AS1.I17.R20802	MC20.MG37.AS1.I19.C463				MC20.MG36.AS1.I1.C18895
		MC20.MG18.AS1.I11.R44073				MC20.MG20.AS1.I1.C4175						MC20.MG7.AS1.I9.R5120									MC20.MG31.AS1.I1.C18164	MC20.MG30.AS1.I1.C1761			MC20.MG22.AS1.I22.R27570	MC20.MG23.AS1.I1.C1891	MC20.MG24.AS1.I1.C3194	MC20.MG25.AS1.I16.R21518			MC20.MG28.AS1.I17.R2082	MC20.MG37.AS1.I19.C464				MC20.MG36.AS1.I1.C19002
		MC20.MG18.AS1.I11.R44220				MC20.MG20.AS1.I1.C4206						MC20.MG7.AS1.I9.R5121									MC20.MG31.AS1.I1.C1823	MC20.MG30.AS1.I1.C1763			MC20.MG22.AS1.I22.R28152	MC20.MG23.AS1.I1.C1892	MC20.MG24.AS1.I1.C3237	MC20.MG25.AS1.I16.R21604			MC20.MG28.AS1.I17.R20839	MC20.MG37.AS1.I19.C557				MC20.MG36.AS1.I1.C19035
		MC20.MG18.AS1.I11.R44243				MC20.MG20.AS1.I1.C4224						MC20.MG7.AS1.I9.R513									MC20.MG31.AS1.I1.C1824	MC20.MG30.AS1.I1.C1764			MC20.MG22.AS1.I22.R28166	MC20.MG23.AS1.I1.C1897	MC20.MG24.AS1.I1.C3238	MC20.MG25.AS1.I16.R21758			MC20.MG28.AS1.I17.R20869	MC20.MG37.AS1.I19.C558				MC20.MG36.AS1.I1.C19037
		MC20.MG18.AS1.I11.R44340				MC20.MG20.AS1.I1.C4244						MC20.MG7.AS1.I9.R5146									MC20.MG31.AS1.I1.C1825	MC20.MG30.AS1.I1.C1767			MC20.MG22.AS1.I22.R28184	MC20.MG23.AS1.I1.C1905	MC20.MG24.AS1.I1.C3259	MC20.MG25.AS1.I16.R21845			MC20.MG28.AS1.I17.R20938	MC20.MG37.AS1.I19.C567				MC20.MG36.AS1.I1.C19041
		MC20.MG18.AS1.I11.R4437				MC20.MG20.AS1.I1.C4256						MC20.MG7.AS1.I9.R5308									MC20.MG31.AS1.I1.C1826	MC20.MG30.AS1.I1.C177			MC20.MG22.AS1.I22.R28222	MC20.MG23.AS1.I1.C1906	MC20.MG24.AS1.I1.C3260	MC20.MG25.AS1.I16.R21900			MC20.MG28.AS1.I17.R20965	MC20.MG37.AS1.I19.C568				MC20.MG36.AS1.I1.C19051
		MC20.MG18.AS1.I11.R44962				MC20.MG20.AS1.I1.C4261						MC20.MG7.AS1.I9.R5348									MC20.MG31.AS1.I1.C1827	MC20.MG30.AS1.I1.C1778			MC20.MG22.AS1.I22.R28223	MC20.MG23.AS1.I1.C1907	MC20.MG24.AS1.I1.C3261	MC20.MG25.AS1.I16.R22024			MC20.MG28.AS1.I17.R20983	MC20.MG37.AS1.I19.C775				MC20.MG36.AS1.I1.C19095
		MC20.MG18.AS1.I11.R45166				MC20.MG20.AS1.I1.C4271						MC20.MG7.AS1.I9.R5835									MC20.MG31.AS1.I1.C18324	MC20.MG30.AS1.I1.C1779			MC20.MG22.AS1.I22.R28662	MC20.MG23.AS1.I1.C1911	MC20.MG24.AS1.I1.C3270	MC20.MG25.AS1.I16.R22025			MC20.MG28.AS1.I17.R21220	MC20.MG37.AS1.I19.C776				MC20.MG36.AS1.I1.C19131
		MC20.MG18.AS1.I11.R45235				MC20.MG20.AS1.I1.C4285						MC20.MG7.AS1.I9.R5944									MC20.MG31.AS1.I1.C18338	MC20.MG30.AS1.I1.C178			MC20.MG22.AS1.I22.R28744	MC20.MG23.AS1.I1.C1949	MC20.MG24.AS1.I1.C3271	MC20.MG25.AS1.I16.R22148			MC20.MG28.AS1.I17.R21226	MC20.MG37.AS1.I21.C107				MC20.MG36.AS1.I1.C19144
		MC20.MG18.AS1.I11.R45265				MC20.MG20.AS1.I1.C4303						MC20.MG7.AS1.I9.R5945									MC20.MG31.AS1.I1.C18365	MC20.MG30.AS1.I1.C1780			MC20.MG22.AS1.I22.R28749	MC20.MG23.AS1.I1.C1950	MC20.MG24.AS1.I1.C3272	MC20.MG25.AS1.I16.R22239			MC20.MG28.AS1.I17.R21367	MC20.MG37.AS1.I21.C108				MC20.MG36.AS1.I1.C19278
		MC20.MG18.AS1.I11.R45331				MC20.MG20.AS1.I1.C4308						MC20.MG7.AS1.I9.R5967									MC20.MG31.AS1.I1.C1837	MC20.MG30.AS1.I1.C179			MC20.MG22.AS1.I22.R28903	MC20.MG23.AS1.I1.C1973	MC20.MG24.AS1.I1.C3283	MC20.MG25.AS1.I16.R22243			MC20.MG28.AS1.I17.R2140	MC20.MG37.AS1.I21.C65				MC20.MG36.AS1.I1.C1941
		MC20.MG18.AS1.I11.R45408				MC20.MG20.AS1.I1.C4337						MC20.MG7.AS1.I9.R5968									MC20.MG31.AS1.I1.C18373	MC20.MG30.AS1.I1.C1790			MC20.MG22.AS1.I22.R29105	MC20.MG23.AS1.I1.C1976	MC20.MG24.AS1.I1.C3329	MC20.MG25.AS1.I16.R22546			MC20.MG28.AS1.I17.R21428	MC20.MG37.AS1.I21.C66				MC20.MG36.AS1.I1.C1942
		MC20.MG18.AS1.I11.R45430				MC20.MG20.AS1.I1.C4348						MC20.MG7.AS1.I9.R6310									MC20.MG31.AS1.I1.C18377	MC20.MG30.AS1.I1.C1791			MC20.MG22.AS1.I22.R29326	MC20.MG23.AS1.I1.C1977	MC20.MG24.AS1.I1.C3330	MC20.MG25.AS1.I16.R22685			MC20.MG28.AS1.I17.R21527	MC20.MG37.AS1.I23.C100				MC20.MG36.AS1.I1.C19422
		MC20.MG18.AS1.I11.R45554				MC20.MG20.AS1.I1.C4363						MC20.MG7.AS1.I9.R6311									MC20.MG31.AS1.I1.C1838	MC20.MG30.AS1.I1.C1792			MC20.MG22.AS1.I22.R29380	MC20.MG23.AS1.I1.C1980	MC20.MG24.AS1.I1.C3331	MC20.MG25.AS1.I16.R22698			MC20.MG28.AS1.I17.R216	MC20.MG37.AS1.I23.C47				MC20.MG36.AS1.I1.C19423
		MC20.MG18.AS1.I11.R45645				MC20.MG20.AS1.I1.C4364						MC20.MG7.AS1.I9.R6376									MC20.MG31.AS1.I1.C1839	MC20.MG30.AS1.I1.C1793			MC20.MG22.AS1.I22.R29397	MC20.MG23.AS1.I1.C2004	MC20.MG24.AS1.I1.C3353	MC20.MG25.AS1.I16.R22712			MC20.MG28.AS1.I17.R21764	MC20.MG37.AS1.I23.C48				MC20.MG36.AS1.I1.C1943
		MC20.MG18.AS1.I11.R4568				MC20.MG20.AS1.I1.C4388						MC20.MG7.AS1.I9.R6828									MC20.MG31.AS1.I1.C18416	MC20.MG30.AS1.I1.C1804			MC20.MG22.AS1.I22.R29420	MC20.MG23.AS1.I1.C2005	MC20.MG24.AS1.I1.C3354	MC20.MG25.AS1.I16.R22758			MC20.MG28.AS1.I17.R21806	MC20.MG37.AS1.I23.C99				MC20.MG36.AS1.I1.C19435
		MC20.MG18.AS1.I11.R45749				MC20.MG20.AS1.I1.C4399						MC20.MG7.AS1.I9.R7056									MC20.MG31.AS1.I1.C18434	MC20.MG30.AS1.I1.C1805			MC20.MG22.AS1.I22.R29511	MC20.MG23.AS1.I1.C2006	MC20.MG24.AS1.I1.C3355	MC20.MG25.AS1.I16.R22883			MC20.MG28.AS1.I17.R21940	MC20.MG37.AS1.I24.R10047				MC20.MG36.AS1.I1.C1944
		MC20.MG18.AS1.I11.R45775				MC20.MG20.AS1.I1.C4415						MC20.MG7.AS1.I9.R7057									MC20.MG31.AS1.I1.C18483	MC20.MG30.AS1.I1.C1806			MC20.MG22.AS1.I22.R29716	MC20.MG23.AS1.I1.C2013	MC20.MG24.AS1.I1.C3405	MC20.MG25.AS1.I16.R23052			MC20.MG28.AS1.I17.R22372	MC20.MG37.AS1.I24.R10100				MC20.MG36.AS1.I1.C1945
		MC20.MG18.AS1.I11.R4579				MC20.MG20.AS1.I1.C4426						MC20.MG7.AS1.I9.R7183									MC20.MG31.AS1.I1.C18498	MC20.MG30.AS1.I1.C1807			MC20.MG22.AS1.I22.R29740	MC20.MG23.AS1.I1.C2014	MC20.MG24.AS1.I1.C3419	MC20.MG25.AS1.I16.R23334			MC20.MG28.AS1.I17.R22374	MC20.MG37.AS1.I24.R10113				MC20.MG36.AS1.I1.C1946
		MC20.MG18.AS1.I11.R46431				MC20.MG20.AS1.I1.C4430						MC20.MG7.AS1.I9.R7184									MC20.MG31.AS1.I1.C18566	MC20.MG30.AS1.I1.C1808			MC20.MG22.AS1.I22.R29868	MC20.MG23.AS1.I1.C2015	MC20.MG24.AS1.I1.C3422	MC20.MG25.AS1.I16.R23615			MC20.MG28.AS1.I17.R22409	MC20.MG37.AS1.I24.R1022				MC20.MG36.AS1.I1.C19495
		MC20.MG18.AS1.I11.R46501				MC20.MG20.AS1.I1.C4445						MC20.MG7.AS1.I9.R7282									MC20.MG31.AS1.I1.C18571	MC20.MG30.AS1.I1.C1850			MC20.MG22.AS1.I22.R30266	MC20.MG23.AS1.I1.C2019	MC20.MG24.AS1.I1.C3451	MC20.MG25.AS1.I16.R23633			MC20.MG28.AS1.I17.R22579	MC20.MG37.AS1.I24.R10237				MC20.MG36.AS1.I1.C19526
		MC20.MG18.AS1.I11.R46598				MC20.MG20.AS1.I1.C4447						MC20.MG7.AS1.I9.R7298									MC20.MG31.AS1.I1.C18652	MC20.MG30.AS1.I1.C1851			MC20.MG22.AS1.I22.R30322	MC20.MG23.AS1.I1.C2029	MC20.MG24.AS1.I1.C3460	MC20.MG25.AS1.I16.R23859			MC20.MG28.AS1.I17.R22639	MC20.MG37.AS1.I24.R10254				MC20.MG36.AS1.I1.C19562
		MC20.MG18.AS1.I11.R46761				MC20.MG20.AS1.I1.C4467						MC20.MG7.AS1.I9.R7323									MC20.MG31.AS1.I1.C18677	MC20.MG30.AS1.I1.C1852			MC20.MG22.AS1.I22.R30414	MC20.MG23.AS1.I1.C2030	MC20.MG24.AS1.I1.C3474	MC20.MG25.AS1.I16.R23959			MC20.MG28.AS1.I17.R22890	MC20.MG37.AS1.I24.R10317				MC20.MG36.AS1.I1.C1957
		MC20.MG18.AS1.I11.R46879				MC20.MG20.AS1.I1.C4503						MC20.MG7.AS1.I9.R7324									MC20.MG31.AS1.I1.C18689	MC20.MG30.AS1.I1.C1853			MC20.MG22.AS1.I22.R30620	MC20.MG23.AS1.I1.C2031	MC20.MG24.AS1.I1.C3475	MC20.MG25.AS1.I16.R24029			MC20.MG28.AS1.I17.R22963	MC20.MG37.AS1.I24.R1054				MC20.MG36.AS1.I1.C1958
		MC20.MG18.AS1.I11.R46980				MC20.MG20.AS1.I1.C4518						MC20.MG7.AS1.I9.R7327									MC20.MG31.AS1.I1.C18698	MC20.MG30.AS1.I1.C1854			MC20.MG22.AS1.I22.R30699	MC20.MG23.AS1.I1.C2032	MC20.MG24.AS1.I1.C3483	MC20.MG25.AS1.I16.R24030			MC20.MG28.AS1.I17.R22988	MC20.MG37.AS1.I24.R10567				MC20.MG36.AS1.I1.C1959
		MC20.MG18.AS1.I11.R4738				MC20.MG20.AS1.I1.C4537						MC20.MG7.AS1.I9.R7328									MC20.MG31.AS1.I1.C18715	MC20.MG30.AS1.I1.C1855			MC20.MG22.AS1.I22.R30790	MC20.MG23.AS1.I1.C204	MC20.MG24.AS1.I1.C3495	MC20.MG25.AS1.I16.R24034			MC20.MG28.AS1.I17.R22992	MC20.MG37.AS1.I24.R10584				MC20.MG36.AS1.I1.C1960
		MC20.MG18.AS1.I11.R47518				MC20.MG20.AS1.I1.C4539						MC20.MG7.AS1.I9.R7476									MC20.MG31.AS1.I1.C1878	MC20.MG30.AS1.I1.C1856			MC20.MG22.AS1.I22.R30815	MC20.MG23.AS1.I1.C205	MC20.MG24.AS1.I1.C3499	MC20.MG25.AS1.I16.R24437			MC20.MG28.AS1.I17.R23086	MC20.MG37.AS1.I24.R10618				MC20.MG36.AS1.I1.C1963
		MC20.MG18.AS1.I11.R47730				MC20.MG20.AS1.I1.C4553						MC20.MG7.AS1.I9.R7722									MC20.MG31.AS1.I1.C18786	MC20.MG30.AS1.I1.C1857			MC20.MG22.AS1.I22.R30855	MC20.MG23.AS1.I1.C206	MC20.MG24.AS1.I1.C3507	MC20.MG25.AS1.I16.R24463			MC20.MG28.AS1.I17.R2318	MC20.MG37.AS1.I24.R1065				MC20.MG36.AS1.I1.C1964
		MC20.MG18.AS1.I11.R47818				MC20.MG20.AS1.I1.C4562						MC20.MG7.AS1.I9.R7723									MC20.MG31.AS1.I1.C1879	MC20.MG30.AS1.I1.C1858			MC20.MG22.AS1.I22.R30873	MC20.MG23.AS1.I1.C207	MC20.MG24.AS1.I1.C3536	MC20.MG25.AS1.I16.R24671			MC20.MG28.AS1.I17.R23238	MC20.MG37.AS1.I24.R10755				MC20.MG36.AS1.I1.C19642
		MC20.MG18.AS1.I11.R47833				MC20.MG20.AS1.I1.C4602						MC20.MG7.AS1.I9.R7838									MC20.MG31.AS1.I1.C1880	MC20.MG30.AS1.I1.C1859			MC20.MG22.AS1.I22.R31034	MC20.MG23.AS1.I1.C2074	MC20.MG24.AS1.I1.C3551	MC20.MG25.AS1.I16.R24873			MC20.MG28.AS1.I17.R23415	MC20.MG37.AS1.I24.R10771				MC20.MG36.AS1.I1.C1965
		MC20.MG18.AS1.I11.R48025				MC20.MG20.AS1.I1.C4610						MC20.MG7.AS1.I9.R7967									MC20.MG31.AS1.I1.C1881	MC20.MG30.AS1.I1.C1872			MC20.MG22.AS1.I22.R31110	MC20.MG23.AS1.I1.C208	MC20.MG24.AS1.I1.C3554	MC20.MG25.AS1.I16.R25222			MC20.MG28.AS1.I17.R23467	MC20.MG37.AS1.I24.R1103				MC20.MG36.AS1.I1.C1966
		MC20.MG18.AS1.I11.R48032				MC20.MG20.AS1.I1.C4614						MC20.MG7.AS1.I9.R8183									MC20.MG31.AS1.I1.C1882	MC20.MG30.AS1.I1.C1873			MC20.MG22.AS1.I22.R31144	MC20.MG23.AS1.I1.C209	MC20.MG24.AS1.I1.C3555	MC20.MG25.AS1.I16.R25392			MC20.MG28.AS1.I17.R23468	MC20.MG37.AS1.I24.R11067				MC20.MG36.AS1.I1.C19662
		MC20.MG18.AS1.I11.R48178				MC20.MG20.AS1.I1.C4620						MC20.MG7.AS1.I9.R8415									MC20.MG31.AS1.I1.C1895	MC20.MG30.AS1.I1.C1874			MC20.MG22.AS1.I22.R31238	MC20.MG23.AS1.I1.C2090	MC20.MG24.AS1.I1.C3561	MC20.MG25.AS1.I16.R25450			MC20.MG28.AS1.I17.R23478	MC20.MG37.AS1.I24.R1108				MC20.MG36.AS1.I1.C1967
		MC20.MG18.AS1.I11.R48297				MC20.MG20.AS1.I1.C4628						MC20.MG7.AS1.I9.R8416									MC20.MG31.AS1.I1.C1896	MC20.MG30.AS1.I1.C1875			MC20.MG22.AS1.I22.R31619	MC20.MG23.AS1.I1.C2091	MC20.MG24.AS1.I1.C3562	MC20.MG25.AS1.I16.R25475			MC20.MG28.AS1.I17.R23527	MC20.MG37.AS1.I24.R11080				MC20.MG36.AS1.I1.C19828
		MC20.MG18.AS1.I11.R48316				MC20.MG20.AS1.I1.C4636						MC20.MG7.AS1.I9.R8541									MC20.MG31.AS1.I1.C1897	MC20.MG30.AS1.I1.C1908			MC20.MG22.AS1.I22.R31721	MC20.MG23.AS1.I1.C2093	MC20.MG24.AS1.I1.C3582	MC20.MG25.AS1.I16.R25592			MC20.MG28.AS1.I17.R24384	MC20.MG37.AS1.I24.R11104				MC20.MG36.AS1.I1.C19917
		MC20.MG18.AS1.I11.R48379				MC20.MG20.AS1.I1.C4686						MC20.MG7.AS1.I9.R8997									MC20.MG31.AS1.I1.C1898	MC20.MG30.AS1.I1.C1909			MC20.MG22.AS1.I22.R31820	MC20.MG23.AS1.I1.C210	MC20.MG24.AS1.I1.C3595	MC20.MG25.AS1.I16.R25698			MC20.MG28.AS1.I17.R24466	MC20.MG37.AS1.I24.R11169				MC20.MG36.AS1.I1.C1995
		MC20.MG18.AS1.I11.R48455				MC20.MG20.AS1.I1.C4691						MC20.MG7.AS1.I9.R9245									MC20.MG31.AS1.I1.C1899	MC20.MG30.AS1.I1.C1910			MC20.MG22.AS1.I22.R3189	MC20.MG23.AS1.I1.C211	MC20.MG24.AS1.I1.C3603	MC20.MG25.AS1.I16.R26157			MC20.MG28.AS1.I17.R24571	MC20.MG37.AS1.I24.R11176				MC20.MG36.AS1.I1.C1996
		MC20.MG18.AS1.I11.R49061				MC20.MG20.AS1.I1.C4698						MC20.MG7.AS1.I9.R9246									MC20.MG31.AS1.I1.C1900	MC20.MG30.AS1.I1.C1946			MC20.MG22.AS1.I22.R3196	MC20.MG23.AS1.I1.C2114	MC20.MG24.AS1.I1.C3615	MC20.MG25.AS1.I16.R26181			MC20.MG28.AS1.I17.R24578	MC20.MG37.AS1.I24.R11225				MC20.MG36.AS1.I1.C1997
		MC20.MG18.AS1.I11.R49268				MC20.MG20.AS1.I1.C4721						MC20.MG7.AS1.I9.R9541									MC20.MG31.AS1.I1.C1901	MC20.MG30.AS1.I1.C1947			MC20.MG22.AS1.I22.R32214	MC20.MG23.AS1.I1.C2115	MC20.MG24.AS1.I1.C3632	MC20.MG25.AS1.I16.R26250			MC20.MG28.AS1.I17.R24717	MC20.MG37.AS1.I24.R11261				MC20.MG36.AS1.I1.C1998
		MC20.MG18.AS1.I11.R49360				MC20.MG20.AS1.I1.C4753						MC20.MG7.AS1.I9.R9542									MC20.MG31.AS1.I1.C1902	MC20.MG30.AS1.I1.C1948			MC20.MG22.AS1.I22.R3225	MC20.MG23.AS1.I1.C2116	MC20.MG24.AS1.I1.C3647	MC20.MG25.AS1.I16.R26283			MC20.MG28.AS1.I17.R24756	MC20.MG37.AS1.I24.R11300				MC20.MG36.AS1.I1.C19982
		MC20.MG18.AS1.I11.R4940				MC20.MG20.AS1.I1.C4778						MC20.MG7.AS1.I9.R964									MC20.MG31.AS1.I1.C1930	MC20.MG30.AS1.I1.C1964			MC20.MG22.AS1.I22.R32595	MC20.MG23.AS1.I1.C212	MC20.MG24.AS1.I1.C3661	MC20.MG25.AS1.I16.R26298			MC20.MG28.AS1.I17.R24859	MC20.MG37.AS1.I24.R1143				MC20.MG36.AS1.I1.C1999
		MC20.MG18.AS1.I11.R49421				MC20.MG20.AS1.I1.C4789						MC20.MG7.AS1.I9.R965									MC20.MG31.AS1.I1.C1931	MC20.MG30.AS1.I1.C1965			MC20.MG22.AS1.I22.R32636	MC20.MG23.AS1.I1.C213	MC20.MG24.AS1.I1.C3682	MC20.MG25.AS1.I16.R264			MC20.MG28.AS1.I17.R24912	MC20.MG37.AS1.I24.R11454				MC20.MG36.AS1.I1.C19996
		MC20.MG18.AS1.I11.R49553				MC20.MG20.AS1.I1.C4798						MC20.MG7.AS1.I9.R9737									MC20.MG31.AS1.I1.C1932	MC20.MG30.AS1.I1.C1966			MC20.MG22.AS1.I22.R32749	MC20.MG23.AS1.I1.C2133	MC20.MG24.AS1.I1.C3696	MC20.MG25.AS1.I16.R26464			MC20.MG28.AS1.I17.R24930	MC20.MG37.AS1.I24.R11636				MC20.MG36.AS1.I1.C19999
		MC20.MG18.AS1.I11.R49697				MC20.MG20.AS1.I1.C4880						MC20.MG7.AS1.I9.R9738									MC20.MG31.AS1.I1.C1933	MC20.MG30.AS1.I1.C1967			MC20.MG22.AS1.I22.R32878	MC20.MG23.AS1.I1.C2139	MC20.MG24.AS1.I1.C3698	MC20.MG25.AS1.I16.R2664			MC20.MG28.AS1.I17.R24995	MC20.MG37.AS1.I24.R11648				MC20.MG36.AS1.I1.C20239
		MC20.MG18.AS1.I11.R50058				MC20.MG20.AS1.I1.C4893															MC20.MG31.AS1.I1.C1934	MC20.MG30.AS1.I1.C1968			MC20.MG22.AS1.I22.R32921	MC20.MG23.AS1.I1.C2140	MC20.MG24.AS1.I1.C3699	MC20.MG25.AS1.I16.R2668			MC20.MG28.AS1.I17.R25036	MC20.MG37.AS1.I24.R11666				MC20.MG36.AS1.I1.C20262
		MC20.MG18.AS1.I11.R50061				MC20.MG20.AS1.I1.C4894															MC20.MG31.AS1.I1.C1978	MC20.MG30.AS1.I1.C1969			MC20.MG22.AS1.I22.R33151	MC20.MG23.AS1.I1.C2148	MC20.MG24.AS1.I1.C3719	MC20.MG25.AS1.I16.R26733			MC20.MG28.AS1.I17.R25354	MC20.MG37.AS1.I24.R11669				MC20.MG36.AS1.I1.C20271
		MC20.MG18.AS1.I11.R50169				MC20.MG20.AS1.I1.C4918															MC20.MG31.AS1.I1.C1979	MC20.MG30.AS1.I1.C1982			MC20.MG22.AS1.I22.R33210	MC20.MG23.AS1.I1.C2149	MC20.MG24.AS1.I1.C3720	MC20.MG25.AS1.I16.R26737			MC20.MG28.AS1.I17.R25372	MC20.MG37.AS1.I24.R11727				MC20.MG36.AS1.I1.C20288
		MC20.MG18.AS1.I11.R50187				MC20.MG20.AS1.I1.C4920															MC20.MG31.AS1.I1.C1980	MC20.MG30.AS1.I1.C1983			MC20.MG22.AS1.I22.R33226	MC20.MG23.AS1.I1.C2150	MC20.MG24.AS1.I1.C3722	MC20.MG25.AS1.I16.R26907			MC20.MG28.AS1.I17.R25390	MC20.MG37.AS1.I24.R11763				MC20.MG36.AS1.I1.C20300
		MC20.MG18.AS1.I11.R50201				MC20.MG20.AS1.I1.C4924															MC20.MG31.AS1.I1.C1981	MC20.MG30.AS1.I1.C1984			MC20.MG22.AS1.I22.R33529	MC20.MG23.AS1.I1.C2166	MC20.MG24.AS1.I1.C3735	MC20.MG25.AS1.I16.R26933			MC20.MG28.AS1.I17.R25401	MC20.MG37.AS1.I24.R11790				MC20.MG36.AS1.I1.C20409
		MC20.MG18.AS1.I11.R5044				MC20.MG20.AS1.I1.C4963															MC20.MG31.AS1.I1.C1982	MC20.MG30.AS1.I1.C2063			MC20.MG22.AS1.I22.R33688	MC20.MG23.AS1.I1.C2167	MC20.MG24.AS1.I1.C3743	MC20.MG25.AS1.I16.R27038			MC20.MG28.AS1.I17.R25467	MC20.MG37.AS1.I24.R11874				MC20.MG36.AS1.I1.C20528
		MC20.MG18.AS1.I11.R50532				MC20.MG20.AS1.I1.C4966															MC20.MG31.AS1.I1.C1986	MC20.MG30.AS1.I1.C2064			MC20.MG22.AS1.I22.R3374	MC20.MG23.AS1.I1.C2170	MC20.MG24.AS1.I1.C3749	MC20.MG25.AS1.I16.R27152			MC20.MG28.AS1.I17.R25591	MC20.MG37.AS1.I24.R11875				MC20.MG36.AS1.I1.C2054
		MC20.MG18.AS1.I11.R50552				MC20.MG20.AS1.I1.C4991															MC20.MG31.AS1.I1.C1987	MC20.MG30.AS1.I1.C2065			MC20.MG22.AS1.I22.R33746	MC20.MG23.AS1.I1.C2171	MC20.MG24.AS1.I1.C3754	MC20.MG25.AS1.I16.R2734			MC20.MG28.AS1.I17.R25705	MC20.MG37.AS1.I24.R11983				MC20.MG36.AS1.I1.C2055
		MC20.MG18.AS1.I11.R50607				MC20.MG20.AS1.I1.C5004															MC20.MG31.AS1.I1.C2015	MC20.MG30.AS1.I1.C2066			MC20.MG22.AS1.I22.R33806	MC20.MG23.AS1.I1.C2172	MC20.MG24.AS1.I1.C3790	MC20.MG25.AS1.I16.R27361			MC20.MG28.AS1.I17.R25823	MC20.MG37.AS1.I24.R12045				MC20.MG36.AS1.I1.C20550
		MC20.MG18.AS1.I11.R50623				MC20.MG20.AS1.I1.C5013															MC20.MG31.AS1.I1.C2016	MC20.MG30.AS1.I1.C2067			MC20.MG22.AS1.I22.R33875	MC20.MG23.AS1.I1.C2173	MC20.MG24.AS1.I1.C3811	MC20.MG25.AS1.I16.R27452			MC20.MG28.AS1.I17.R2587	MC20.MG37.AS1.I24.R12079				MC20.MG36.AS1.I1.C2056
		MC20.MG18.AS1.I11.R50649				MC20.MG20.AS1.I1.C5050															MC20.MG31.AS1.I1.C2017	MC20.MG30.AS1.I1.C2068			MC20.MG22.AS1.I22.R3398	MC20.MG23.AS1.I1.C2183	MC20.MG24.AS1.I1.C3812	MC20.MG25.AS1.I16.R27503			MC20.MG28.AS1.I17.R25890	MC20.MG37.AS1.I24.R12095				MC20.MG36.AS1.I1.C20596
		MC20.MG18.AS1.I11.R50964				MC20.MG20.AS1.I1.C5067															MC20.MG31.AS1.I1.C2028	MC20.MG30.AS1.I1.C2069			MC20.MG22.AS1.I22.R34003	MC20.MG23.AS1.I1.C2184	MC20.MG24.AS1.I1.C3842	MC20.MG25.AS1.I16.R27523			MC20.MG28.AS1.I17.R25892	MC20.MG37.AS1.I24.R12141				MC20.MG36.AS1.I1.C20606
		MC20.MG18.AS1.I11.R5130				MC20.MG20.AS1.I1.C5114															MC20.MG31.AS1.I1.C2029	MC20.MG30.AS1.I1.C2070			MC20.MG22.AS1.I22.R34177	MC20.MG23.AS1.I1.C2199	MC20.MG24.AS1.I1.C3881	MC20.MG25.AS1.I16.R27621			MC20.MG28.AS1.I17.R25954	MC20.MG37.AS1.I24.R12277				MC20.MG36.AS1.I1.C20637
		MC20.MG18.AS1.I11.R51355				MC20.MG20.AS1.I1.C5131															MC20.MG31.AS1.I1.C2030	MC20.MG30.AS1.I1.C2096			MC20.MG22.AS1.I22.R34229	MC20.MG23.AS1.I1.C2200	MC20.MG24.AS1.I1.C3900	MC20.MG25.AS1.I16.R27883			MC20.MG28.AS1.I17.R25995	MC20.MG37.AS1.I24.R12396				MC20.MG36.AS1.I1.C2067
		MC20.MG18.AS1.I11.R5145				MC20.MG20.AS1.I1.C5135															MC20.MG31.AS1.I1.C2031	MC20.MG30.AS1.I1.C2097			MC20.MG22.AS1.I22.R34297	MC20.MG23.AS1.I1.C2201	MC20.MG24.AS1.I1.C3922	MC20.MG25.AS1.I16.R28058			MC20.MG28.AS1.I17.R26016	MC20.MG37.AS1.I24.R12562				MC20.MG36.AS1.I1.C2068
		MC20.MG18.AS1.I11.R51472				MC20.MG20.AS1.I1.C5153															MC20.MG31.AS1.I1.C2051	MC20.MG30.AS1.I1.C2098			MC20.MG22.AS1.I22.R34313	MC20.MG23.AS1.I1.C2207	MC20.MG24.AS1.I1.C3928	MC20.MG25.AS1.I16.R28434			MC20.MG28.AS1.I17.R26241	MC20.MG37.AS1.I24.R12650				MC20.MG36.AS1.I1.C2069
		MC20.MG18.AS1.I11.R51938				MC20.MG20.AS1.I1.C5170															MC20.MG31.AS1.I1.C2052	MC20.MG30.AS1.I1.C2103			MC20.MG22.AS1.I22.R34562	MC20.MG23.AS1.I1.C2208	MC20.MG24.AS1.I1.C3933	MC20.MG25.AS1.I16.R28474			MC20.MG28.AS1.I17.R26336	MC20.MG37.AS1.I24.R12658				MC20.MG36.AS1.I1.C20694
		MC20.MG18.AS1.I11.R51942				MC20.MG20.AS1.I1.C5192															MC20.MG31.AS1.I1.C2053	MC20.MG30.AS1.I1.C2104			MC20.MG22.AS1.I22.R34575	MC20.MG23.AS1.I1.C2214	MC20.MG24.AS1.I1.C3951	MC20.MG25.AS1.I16.R28513			MC20.MG28.AS1.I17.R26450	MC20.MG37.AS1.I24.R12751				MC20.MG36.AS1.I1.C20697
		MC20.MG18.AS1.I11.R52162				MC20.MG20.AS1.I1.C5214															MC20.MG31.AS1.I1.C2054	MC20.MG30.AS1.I1.C2117			MC20.MG22.AS1.I22.R34640	MC20.MG23.AS1.I1.C2215	MC20.MG24.AS1.I1.C3965	MC20.MG25.AS1.I16.R28517			MC20.MG28.AS1.I17.R26532	MC20.MG37.AS1.I24.R12785				MC20.MG36.AS1.I1.C2070
		MC20.MG18.AS1.I11.R52243				MC20.MG20.AS1.I1.C5227															MC20.MG31.AS1.I1.C2132	MC20.MG30.AS1.I1.C2118			MC20.MG22.AS1.I22.R34674	MC20.MG23.AS1.I1.C222	MC20.MG24.AS1.I1.C4002	MC20.MG25.AS1.I16.R28535			MC20.MG28.AS1.I17.R26577	MC20.MG37.AS1.I24.R1280				MC20.MG36.AS1.I1.C2073
		MC20.MG18.AS1.I11.R52820				MC20.MG20.AS1.I1.C5231															MC20.MG31.AS1.I1.C2133	MC20.MG30.AS1.I1.C2119			MC20.MG22.AS1.I22.R34837	MC20.MG23.AS1.I1.C223	MC20.MG24.AS1.I1.C4029	MC20.MG25.AS1.I16.R2879			MC20.MG28.AS1.I17.R26662	MC20.MG37.AS1.I24.R13048				MC20.MG36.AS1.I1.C2074
		MC20.MG18.AS1.I11.R52919				MC20.MG20.AS1.I1.C5255															MC20.MG31.AS1.I1.C2134	MC20.MG30.AS1.I1.C2134			MC20.MG22.AS1.I22.R34862	MC20.MG23.AS1.I1.C2230	MC20.MG24.AS1.I1.C4038	MC20.MG25.AS1.I16.R28796			MC20.MG28.AS1.I17.R26757	MC20.MG37.AS1.I24.R13057				MC20.MG36.AS1.I1.C2075
		MC20.MG18.AS1.I11.R53057				MC20.MG20.AS1.I1.C5271															MC20.MG31.AS1.I1.C2164	MC20.MG30.AS1.I1.C2146			MC20.MG22.AS1.I22.R34870	MC20.MG23.AS1.I1.C2231	MC20.MG24.AS1.I1.C4051	MC20.MG25.AS1.I16.R28846			MC20.MG28.AS1.I17.R26846	MC20.MG37.AS1.I24.R13066				MC20.MG36.AS1.I1.C2076
		MC20.MG18.AS1.I11.R53076				MC20.MG20.AS1.I1.C5287															MC20.MG31.AS1.I1.C2165	MC20.MG30.AS1.I1.C2147			MC20.MG22.AS1.I22.R34992	MC20.MG23.AS1.I1.C2232	MC20.MG24.AS1.I1.C4076	MC20.MG25.AS1.I16.R28911			MC20.MG28.AS1.I17.R26863	MC20.MG37.AS1.I24.R13082				MC20.MG36.AS1.I1.C2077
		MC20.MG18.AS1.I11.R53089				MC20.MG20.AS1.I1.C5294															MC20.MG31.AS1.I1.C2166	MC20.MG30.AS1.I1.C2148			MC20.MG22.AS1.I22.R3505	MC20.MG23.AS1.I1.C2233	MC20.MG24.AS1.I1.C4082	MC20.MG25.AS1.I16.R28936			MC20.MG28.AS1.I17.R26880	MC20.MG37.AS1.I24.R13117				MC20.MG36.AS1.I1.C2078
		MC20.MG18.AS1.I11.R53577				MC20.MG20.AS1.I1.C5296															MC20.MG31.AS1.I1.C2167	MC20.MG30.AS1.I1.C2149			MC20.MG22.AS1.I22.R3532	MC20.MG23.AS1.I1.C2234	MC20.MG24.AS1.I1.C4110	MC20.MG25.AS1.I16.R29059			MC20.MG28.AS1.I17.R26908	MC20.MG37.AS1.I24.R13152				MC20.MG36.AS1.I1.C2079
		MC20.MG18.AS1.I11.R53601				MC20.MG20.AS1.I1.C5310															MC20.MG31.AS1.I1.C2168	MC20.MG30.AS1.I1.C2179			MC20.MG22.AS1.I22.R35385	MC20.MG23.AS1.I1.C2235	MC20.MG24.AS1.I1.C4160	MC20.MG25.AS1.I16.R29153			MC20.MG28.AS1.I17.R26925	MC20.MG37.AS1.I24.R13266				MC20.MG36.AS1.I1.C2080
		MC20.MG18.AS1.I11.R5370				MC20.MG20.AS1.I1.C5342															MC20.MG31.AS1.I1.C2169	MC20.MG30.AS1.I1.C2180			MC20.MG22.AS1.I22.R35399	MC20.MG23.AS1.I1.C2239	MC20.MG24.AS1.I1.C4180	MC20.MG25.AS1.I16.R29175			MC20.MG28.AS1.I17.R26965	MC20.MG37.AS1.I24.R13540				MC20.MG36.AS1.I1.C20820
		MC20.MG18.AS1.I11.R53830				MC20.MG20.AS1.I1.C5345															MC20.MG31.AS1.I1.C2170	MC20.MG30.AS1.I1.C2181			MC20.MG22.AS1.I22.R36010	MC20.MG23.AS1.I1.C224	MC20.MG24.AS1.I1.C4197	MC20.MG25.AS1.I16.R29258			MC20.MG28.AS1.I17.R26981	MC20.MG37.AS1.I24.R13596				MC20.MG36.AS1.I1.C20936
		MC20.MG18.AS1.I11.R5386				MC20.MG20.AS1.I1.C5359															MC20.MG31.AS1.I1.C2182	MC20.MG30.AS1.I1.C2191			MC20.MG22.AS1.I22.R36016	MC20.MG23.AS1.I1.C2240	MC20.MG24.AS1.I1.C4205	MC20.MG25.AS1.I16.R29699			MC20.MG28.AS1.I17.R27078	MC20.MG37.AS1.I24.R13615				MC20.MG36.AS1.I1.C20941
		MC20.MG18.AS1.I11.R53958				MC20.MG20.AS1.I1.C5385															MC20.MG31.AS1.I1.C2183	MC20.MG30.AS1.I1.C2192			MC20.MG22.AS1.I22.R36032	MC20.MG23.AS1.I1.C2241	MC20.MG24.AS1.I1.C4226	MC20.MG25.AS1.I16.R29744			MC20.MG28.AS1.I17.R271	MC20.MG37.AS1.I24.R13793				MC20.MG36.AS1.I1.C20989
		MC20.MG18.AS1.I11.R544				MC20.MG20.AS1.I1.C5398															MC20.MG31.AS1.I1.C2184	MC20.MG30.AS1.I1.C2231			MC20.MG22.AS1.I22.R36034	MC20.MG23.AS1.I1.C225	MC20.MG24.AS1.I1.C4245	MC20.MG25.AS1.I16.R29764			MC20.MG28.AS1.I17.R27180	MC20.MG37.AS1.I24.R1385				MC20.MG36.AS1.I1.C21202
		MC20.MG18.AS1.I11.R54674				MC20.MG20.AS1.I1.C5406															MC20.MG31.AS1.I1.C2185	MC20.MG30.AS1.I1.C2232			MC20.MG22.AS1.I22.R36094	MC20.MG23.AS1.I1.C2257	MC20.MG24.AS1.I1.C4256	MC20.MG25.AS1.I16.R29863			MC20.MG28.AS1.I17.R27206	MC20.MG37.AS1.I24.R13903				MC20.MG36.AS1.I1.C21217
		MC20.MG18.AS1.I11.R54765				MC20.MG20.AS1.I1.C5412															MC20.MG31.AS1.I1.C2192	MC20.MG30.AS1.I1.C2233			MC20.MG22.AS1.I22.R36220	MC20.MG23.AS1.I1.C226	MC20.MG24.AS1.I1.C4382	MC20.MG25.AS1.I16.R29865			MC20.MG28.AS1.I17.R2761	MC20.MG37.AS1.I24.R13943				MC20.MG36.AS1.I1.C21224
		MC20.MG18.AS1.I11.R54821				MC20.MG20.AS1.I1.C5413															MC20.MG31.AS1.I1.C2193	MC20.MG30.AS1.I1.C2260			MC20.MG22.AS1.I22.R36410	MC20.MG23.AS1.I1.C2261	MC20.MG24.AS1.I1.C4396	MC20.MG25.AS1.I16.R30009			MC20.MG28.AS1.I17.R27614	MC20.MG37.AS1.I24.R14090				MC20.MG36.AS1.I1.C21287
		MC20.MG18.AS1.I11.R54840				MC20.MG20.AS1.I1.C5441															MC20.MG31.AS1.I1.C2194	MC20.MG30.AS1.I1.C2261			MC20.MG22.AS1.I22.R36416	MC20.MG23.AS1.I1.C2262	MC20.MG24.AS1.I1.C4441	MC20.MG25.AS1.I16.R30061			MC20.MG28.AS1.I17.R27635	MC20.MG37.AS1.I24.R1420				MC20.MG36.AS1.I1.C21311
		MC20.MG18.AS1.I11.R54859				MC20.MG20.AS1.I1.C5463															MC20.MG31.AS1.I1.C2198	MC20.MG30.AS1.I1.C2262			MC20.MG22.AS1.I22.R36604	MC20.MG23.AS1.I1.C2263	MC20.MG24.AS1.I1.C4443	MC20.MG25.AS1.I16.R30107			MC20.MG28.AS1.I17.R27679	MC20.MG37.AS1.I24.R14210				MC20.MG36.AS1.I1.C21348
		MC20.MG18.AS1.I11.R55069				MC20.MG20.AS1.I1.C5465															MC20.MG31.AS1.I1.C2199	MC20.MG30.AS1.I1.C2293			MC20.MG22.AS1.I22.R36657	MC20.MG23.AS1.I1.C2264	MC20.MG24.AS1.I1.C4451	MC20.MG25.AS1.I16.R30181			MC20.MG28.AS1.I17.R2785	MC20.MG37.AS1.I24.R14243				MC20.MG36.AS1.I1.C2135
		MC20.MG18.AS1.I11.R5509				MC20.MG20.AS1.I1.C5498															MC20.MG31.AS1.I1.C2200	MC20.MG30.AS1.I1.C2294			MC20.MG22.AS1.I22.R36710	MC20.MG23.AS1.I1.C2265	MC20.MG24.AS1.I1.C4487	MC20.MG25.AS1.I16.R30215			MC20.MG28.AS1.I17.R27902	MC20.MG37.AS1.I24.R14403				MC20.MG36.AS1.I1.C2136
		MC20.MG18.AS1.I11.R55150				MC20.MG20.AS1.I1.C5535															MC20.MG31.AS1.I1.C2201	MC20.MG30.AS1.I1.C2295			MC20.MG22.AS1.I22.R36715	MC20.MG23.AS1.I1.C2266	MC20.MG24.AS1.I1.C4501	MC20.MG25.AS1.I16.R30385			MC20.MG28.AS1.I17.R27904	MC20.MG37.AS1.I24.R14590				MC20.MG36.AS1.I1.C2137
		MC20.MG18.AS1.I11.R55176				MC20.MG20.AS1.I1.C5549															MC20.MG31.AS1.I1.C2204	MC20.MG30.AS1.I1.C2296			MC20.MG22.AS1.I22.R36769	MC20.MG23.AS1.I1.C227	MC20.MG24.AS1.I1.C4506	MC20.MG25.AS1.I16.R30399			MC20.MG28.AS1.I17.R27912	MC20.MG37.AS1.I24.R14632				MC20.MG36.AS1.I1.C21378
		MC20.MG18.AS1.I11.R55255				MC20.MG20.AS1.I1.C5564															MC20.MG31.AS1.I1.C2211	MC20.MG30.AS1.I1.C2333			MC20.MG22.AS1.I22.R36851	MC20.MG23.AS1.I1.C2309	MC20.MG24.AS1.I1.C4520	MC20.MG25.AS1.I16.R30420			MC20.MG28.AS1.I17.R27957	MC20.MG37.AS1.I24.R14635				MC20.MG36.AS1.I1.C2138
		MC20.MG18.AS1.I11.R55612				MC20.MG20.AS1.I1.C5586															MC20.MG31.AS1.I1.C2217	MC20.MG30.AS1.I1.C2334			MC20.MG22.AS1.I22.R36888	MC20.MG23.AS1.I1.C2310	MC20.MG24.AS1.I1.C4537	MC20.MG25.AS1.I16.R30567			MC20.MG28.AS1.I17.R27990	MC20.MG37.AS1.I24.R14697				MC20.MG36.AS1.I1.C21427
		MC20.MG18.AS1.I11.R55620				MC20.MG20.AS1.I1.C5593															MC20.MG31.AS1.I1.C2218	MC20.MG30.AS1.I1.C2364			MC20.MG22.AS1.I22.R3689	MC20.MG23.AS1.I1.C2321	MC20.MG24.AS1.I1.C4547	MC20.MG25.AS1.I16.R31004			MC20.MG28.AS1.I17.R28009	MC20.MG37.AS1.I24.R14716				MC20.MG36.AS1.I1.C21451
		MC20.MG18.AS1.I11.R56669				MC20.MG20.AS1.I1.C5640															MC20.MG31.AS1.I1.C2219	MC20.MG30.AS1.I1.C2365			MC20.MG22.AS1.I22.R37034	MC20.MG23.AS1.I1.C233	MC20.MG24.AS1.I1.C4560	MC20.MG25.AS1.I16.R31101			MC20.MG28.AS1.I17.R28150	MC20.MG37.AS1.I24.R14745				MC20.MG36.AS1.I1.C21535
		MC20.MG18.AS1.I11.R56672				MC20.MG20.AS1.I1.C5650															MC20.MG31.AS1.I1.C2230	MC20.MG30.AS1.I1.C2366			MC20.MG22.AS1.I22.R3708	MC20.MG23.AS1.I1.C234	MC20.MG24.AS1.I1.C4562	MC20.MG25.AS1.I16.R31113			MC20.MG28.AS1.I17.R283	MC20.MG37.AS1.I24.R14756				MC20.MG36.AS1.I1.C21543
		MC20.MG18.AS1.I11.R56877				MC20.MG20.AS1.I1.C5652															MC20.MG31.AS1.I1.C2231	MC20.MG30.AS1.I1.C2396			MC20.MG22.AS1.I22.R37219	MC20.MG23.AS1.I1.C2347	MC20.MG24.AS1.I1.C4565	MC20.MG25.AS1.I16.R31137			MC20.MG28.AS1.I17.R28356	MC20.MG37.AS1.I24.R14843				MC20.MG36.AS1.I1.C21644
		MC20.MG18.AS1.I11.R56948				MC20.MG20.AS1.I1.C5686															MC20.MG31.AS1.I1.C2232	MC20.MG30.AS1.I1.C2397			MC20.MG22.AS1.I22.R37340	MC20.MG23.AS1.I1.C235	MC20.MG24.AS1.I1.C4584	MC20.MG25.AS1.I16.R31148			MC20.MG28.AS1.I17.R28358	MC20.MG37.AS1.I24.R14849				MC20.MG36.AS1.I1.C21689
		MC20.MG18.AS1.I11.R57074				MC20.MG20.AS1.I1.C5747															MC20.MG31.AS1.I1.C2233	MC20.MG30.AS1.I1.C2398			MC20.MG22.AS1.I22.R37448	MC20.MG23.AS1.I1.C236	MC20.MG24.AS1.I1.C4594	MC20.MG25.AS1.I16.R31513			MC20.MG28.AS1.I17.R28562	MC20.MG37.AS1.I24.R14868				MC20.MG36.AS1.I1.C21724
		MC20.MG18.AS1.I11.R57144				MC20.MG20.AS1.I1.C5755															MC20.MG31.AS1.I1.C2234	MC20.MG30.AS1.I1.C2399			MC20.MG22.AS1.I22.R37508	MC20.MG23.AS1.I1.C237	MC20.MG24.AS1.I1.C4642	MC20.MG25.AS1.I16.R31629			MC20.MG28.AS1.I17.R28630	MC20.MG37.AS1.I24.R14869				MC20.MG36.AS1.I1.C2214
		MC20.MG18.AS1.I11.R57457				MC20.MG20.AS1.I1.C5803															MC20.MG31.AS1.I1.C2235	MC20.MG30.AS1.I1.C2463			MC20.MG22.AS1.I22.R37513	MC20.MG23.AS1.I1.C238	MC20.MG24.AS1.I1.C4654	MC20.MG25.AS1.I16.R31658			MC20.MG28.AS1.I17.R28681	MC20.MG37.AS1.I24.R14922				MC20.MG36.AS1.I1.C2215
		MC20.MG18.AS1.I11.R5762				MC20.MG20.AS1.I1.C5824															MC20.MG31.AS1.I1.C2236	MC20.MG30.AS1.I1.C2464			MC20.MG22.AS1.I22.R3767	MC20.MG23.AS1.I1.C2389	MC20.MG24.AS1.I1.C4668	MC20.MG25.AS1.I16.R31714			MC20.MG28.AS1.I17.R28705	MC20.MG37.AS1.I24.R14973				MC20.MG36.AS1.I1.C2216
		MC20.MG18.AS1.I11.R5841				MC20.MG20.AS1.I1.C5847															MC20.MG31.AS1.I1.C2237	MC20.MG30.AS1.I1.C2509			MC20.MG22.AS1.I22.R37948	MC20.MG23.AS1.I1.C239	MC20.MG24.AS1.I1.C4673	MC20.MG25.AS1.I16.R31784			MC20.MG28.AS1.I17.R28710	MC20.MG37.AS1.I24.R15006				MC20.MG36.AS1.I1.C2217
		MC20.MG18.AS1.I11.R5898				MC20.MG20.AS1.I1.C5852															MC20.MG31.AS1.I1.C2256	MC20.MG30.AS1.I1.C2512			MC20.MG22.AS1.I22.R38197	MC20.MG23.AS1.I1.C2391	MC20.MG24.AS1.I1.C4676	MC20.MG25.AS1.I16.R31823			MC20.MG28.AS1.I17.R28729	MC20.MG37.AS1.I24.R1506				MC20.MG36.AS1.I1.C2239
		MC20.MG18.AS1.I11.R6071				MC20.MG20.AS1.I1.C5884															MC20.MG31.AS1.I1.C2257	MC20.MG30.AS1.I1.C2551			MC20.MG22.AS1.I22.R38235	MC20.MG23.AS1.I1.C240	MC20.MG24.AS1.I1.C4683	MC20.MG25.AS1.I16.R3185			MC20.MG28.AS1.I17.R28750	MC20.MG37.AS1.I24.R15142				MC20.MG36.AS1.I1.C2240
		MC20.MG18.AS1.I11.R6148				MC20.MG20.AS1.I1.C5888															MC20.MG31.AS1.I1.C2258	MC20.MG30.AS1.I1.C2552			MC20.MG22.AS1.I22.R38248	MC20.MG23.AS1.I1.C2423	MC20.MG24.AS1.I1.C4708	MC20.MG25.AS1.I16.R31881			MC20.MG28.AS1.I17.R28782	MC20.MG37.AS1.I24.R15167				MC20.MG36.AS1.I1.C2241
		MC20.MG18.AS1.I11.R6180				MC20.MG20.AS1.I1.C5889															MC20.MG31.AS1.I1.C2302	MC20.MG30.AS1.I1.C2553			MC20.MG22.AS1.I22.R3827	MC20.MG23.AS1.I1.C2426	MC20.MG24.AS1.I1.C4714	MC20.MG25.AS1.I16.R3205			MC20.MG28.AS1.I17.R28845	MC20.MG37.AS1.I24.R1526				MC20.MG36.AS1.I1.C2242
		MC20.MG18.AS1.I11.R6242				MC20.MG20.AS1.I1.C5896															MC20.MG31.AS1.I1.C2303	MC20.MG30.AS1.I1.C2625			MC20.MG22.AS1.I22.R38284	MC20.MG23.AS1.I1.C2497	MC20.MG24.AS1.I1.C4716	MC20.MG25.AS1.I16.R32051			MC20.MG28.AS1.I17.R29030	MC20.MG37.AS1.I24.R15320				MC20.MG36.AS1.I1.C2243
		MC20.MG18.AS1.I11.R6273				MC20.MG20.AS1.I1.C5947															MC20.MG31.AS1.I1.C2304	MC20.MG30.AS1.I1.C2626			MC20.MG22.AS1.I22.R38349	MC20.MG23.AS1.I1.C2510	MC20.MG24.AS1.I1.C4748	MC20.MG25.AS1.I16.R321			MC20.MG28.AS1.I17.R29078	MC20.MG37.AS1.I24.R15361				MC20.MG36.AS1.I1.C2258
		MC20.MG18.AS1.I11.R6275				MC20.MG20.AS1.I1.C5958															MC20.MG31.AS1.I1.C2305	MC20.MG30.AS1.I1.C2627			MC20.MG22.AS1.I22.R38456	MC20.MG23.AS1.I1.C253	MC20.MG24.AS1.I1.C4752	MC20.MG25.AS1.I16.R32111			MC20.MG28.AS1.I17.R2908	MC20.MG37.AS1.I24.R15428				MC20.MG36.AS1.I1.C2259
		MC20.MG18.AS1.I11.R6378				MC20.MG20.AS1.I1.C5963															MC20.MG31.AS1.I1.C2306	MC20.MG30.AS1.I1.C2628			MC20.MG22.AS1.I22.R38914	MC20.MG23.AS1.I1.C254	MC20.MG24.AS1.I1.C4760	MC20.MG25.AS1.I16.R32243			MC20.MG28.AS1.I17.R29101	MC20.MG37.AS1.I24.R15494				MC20.MG36.AS1.I1.C2260
		MC20.MG18.AS1.I11.R638				MC20.MG20.AS1.I1.C5977															MC20.MG31.AS1.I1.C2316	MC20.MG30.AS1.I1.C2629			MC20.MG22.AS1.I22.R39001	MC20.MG23.AS1.I1.C2540	MC20.MG24.AS1.I1.C4802	MC20.MG25.AS1.I16.R32399			MC20.MG28.AS1.I17.R29194	MC20.MG37.AS1.I24.R15527				MC20.MG36.AS1.I1.C2261
		MC20.MG18.AS1.I11.R6394				MC20.MG20.AS1.I1.C5986															MC20.MG31.AS1.I1.C2317	MC20.MG30.AS1.I1.C2630			MC20.MG22.AS1.I22.R39056	MC20.MG23.AS1.I1.C2541	MC20.MG24.AS1.I1.C4810	MC20.MG25.AS1.I16.R32486			MC20.MG28.AS1.I17.R29222	MC20.MG37.AS1.I24.R15576				MC20.MG36.AS1.I1.C2262
		MC20.MG18.AS1.I11.R6430				MC20.MG20.AS1.I1.C6031															MC20.MG31.AS1.I1.C2318	MC20.MG30.AS1.I1.C2631			MC20.MG22.AS1.I22.R3912	MC20.MG23.AS1.I1.C2543	MC20.MG24.AS1.I1.C4821	MC20.MG25.AS1.I16.R32546			MC20.MG28.AS1.I17.R29315	MC20.MG37.AS1.I24.R15637				MC20.MG36.AS1.I1.C2263
		MC20.MG18.AS1.I11.R6476				MC20.MG20.AS1.I1.C6074															MC20.MG31.AS1.I1.C2319	MC20.MG30.AS1.I1.C2690			MC20.MG22.AS1.I22.R39366	MC20.MG23.AS1.I1.C2548	MC20.MG24.AS1.I1.C4878	MC20.MG25.AS1.I16.R32579			MC20.MG28.AS1.I17.R29320	MC20.MG37.AS1.I24.R15774				MC20.MG36.AS1.I1.C2264
		MC20.MG18.AS1.I11.R6700				MC20.MG20.AS1.I1.C6116															MC20.MG31.AS1.I1.C2320	MC20.MG30.AS1.I1.C2691			MC20.MG22.AS1.I22.R39370	MC20.MG23.AS1.I1.C255	MC20.MG24.AS1.I1.C4882	MC20.MG25.AS1.I16.R33228			MC20.MG28.AS1.I17.R2947	MC20.MG37.AS1.I24.R15782				MC20.MG36.AS1.I1.C2280
		MC20.MG18.AS1.I11.R699				MC20.MG20.AS1.I1.C6161															MC20.MG31.AS1.I1.C2337	MC20.MG30.AS1.I1.C2722			MC20.MG22.AS1.I22.R39456	MC20.MG23.AS1.I1.C2570	MC20.MG24.AS1.I1.C4906	MC20.MG25.AS1.I16.R33278			MC20.MG28.AS1.I17.R29471	MC20.MG37.AS1.I24.R15785				MC20.MG36.AS1.I1.C2281
		MC20.MG18.AS1.I11.R7097				MC20.MG20.AS1.I1.C6191															MC20.MG31.AS1.I1.C2338	MC20.MG30.AS1.I1.C2723			MC20.MG22.AS1.I22.R3946	MC20.MG23.AS1.I1.C2572	MC20.MG24.AS1.I1.C4910	MC20.MG25.AS1.I16.R33334			MC20.MG28.AS1.I17.R2966	MC20.MG37.AS1.I24.R1584				MC20.MG36.AS1.I1.C2282
		MC20.MG18.AS1.I11.R7136				MC20.MG20.AS1.I1.C6192															MC20.MG31.AS1.I1.C2339	MC20.MG30.AS1.I1.C2724			MC20.MG22.AS1.I22.R39481	MC20.MG23.AS1.I1.C2581	MC20.MG24.AS1.I1.C4943	MC20.MG25.AS1.I16.R33396			MC20.MG28.AS1.I17.R29683	MC20.MG37.AS1.I24.R15882				MC20.MG36.AS1.I1.C2283
		MC20.MG18.AS1.I11.R7148				MC20.MG20.AS1.I1.C6218															MC20.MG31.AS1.I1.C2397	MC20.MG30.AS1.I1.C2725			MC20.MG22.AS1.I22.R39523	MC20.MG23.AS1.I1.C2588	MC20.MG24.AS1.I1.C4948	MC20.MG25.AS1.I16.R33567			MC20.MG28.AS1.I17.R29752	MC20.MG37.AS1.I24.R15907				MC20.MG36.AS1.I1.C2311
		MC20.MG18.AS1.I11.R716				MC20.MG20.AS1.I1.C6261															MC20.MG31.AS1.I1.C2398	MC20.MG30.AS1.I1.C2745			MC20.MG22.AS1.I22.R39640	MC20.MG23.AS1.I1.C2593	MC20.MG24.AS1.I1.C4949	MC20.MG25.AS1.I16.R33734			MC20.MG28.AS1.I17.R29768	MC20.MG37.AS1.I24.R15918				MC20.MG36.AS1.I1.C2312
		MC20.MG18.AS1.I11.R7181				MC20.MG20.AS1.I1.C6266															MC20.MG31.AS1.I1.C2399	MC20.MG30.AS1.I1.C2746			MC20.MG22.AS1.I22.R39654	MC20.MG23.AS1.I1.C2598	MC20.MG24.AS1.I1.C4955	MC20.MG25.AS1.I16.R33780			MC20.MG28.AS1.I17.R29808	MC20.MG37.AS1.I24.R15949				MC20.MG36.AS1.I1.C2313
		MC20.MG18.AS1.I11.R7247				MC20.MG20.AS1.I1.C6270															MC20.MG31.AS1.I1.C2400	MC20.MG30.AS1.I1.C2821			MC20.MG22.AS1.I22.R3972	MC20.MG23.AS1.I1.C2612	MC20.MG24.AS1.I1.C4962	MC20.MG25.AS1.I16.R33794			MC20.MG28.AS1.I17.R29878	MC20.MG37.AS1.I24.R16010				MC20.MG36.AS1.I1.C2314
		MC20.MG18.AS1.I11.R7360				MC20.MG20.AS1.I1.C6282															MC20.MG31.AS1.I1.C2401	MC20.MG30.AS1.I1.C2822			MC20.MG22.AS1.I22.R39749	MC20.MG23.AS1.I1.C2617	MC20.MG24.AS1.I1.C4969	MC20.MG25.AS1.I16.R33919			MC20.MG28.AS1.I17.R29879	MC20.MG37.AS1.I24.R16015				MC20.MG36.AS1.I1.C2315
		MC20.MG18.AS1.I11.R7668				MC20.MG20.AS1.I1.C6294															MC20.MG31.AS1.I1.C2402	MC20.MG30.AS1.I1.C2823			MC20.MG22.AS1.I22.R39818	MC20.MG23.AS1.I1.C2634	MC20.MG24.AS1.I1.C4973	MC20.MG25.AS1.I16.R33921			MC20.MG28.AS1.I17.R29915	MC20.MG37.AS1.I24.R16108				MC20.MG36.AS1.I1.C2327
		MC20.MG18.AS1.I11.R7851				MC20.MG20.AS1.I1.C6330															MC20.MG31.AS1.I1.C2468	MC20.MG30.AS1.I1.C2824			MC20.MG22.AS1.I22.R39843	MC20.MG23.AS1.I1.C2641	MC20.MG24.AS1.I1.C4986	MC20.MG25.AS1.I16.R34002			MC20.MG28.AS1.I17.R29922	MC20.MG37.AS1.I24.R16176				MC20.MG36.AS1.I1.C2328
		MC20.MG18.AS1.I11.R7988				MC20.MG20.AS1.I1.C6378															MC20.MG31.AS1.I1.C2469	MC20.MG30.AS1.I1.C2836			MC20.MG22.AS1.I22.R40372	MC20.MG23.AS1.I1.C2651	MC20.MG24.AS1.I1.C5060	MC20.MG25.AS1.I16.R34021			MC20.MG28.AS1.I17.R29936	MC20.MG37.AS1.I24.R16225				MC20.MG36.AS1.I1.C2329
		MC20.MG18.AS1.I11.R8020				MC20.MG20.AS1.I1.C6403															MC20.MG31.AS1.I1.C247	MC20.MG30.AS1.I1.C2837			MC20.MG22.AS1.I22.R40484	MC20.MG23.AS1.I1.C2653	MC20.MG24.AS1.I1.C5067	MC20.MG25.AS1.I16.R3405			MC20.MG28.AS1.I17.R30071	MC20.MG37.AS1.I24.R16236				MC20.MG36.AS1.I1.C2330
		MC20.MG18.AS1.I11.R8218				MC20.MG20.AS1.I1.C6417															MC20.MG31.AS1.I1.C2470	MC20.MG30.AS1.I1.C2838			MC20.MG22.AS1.I22.R40762	MC20.MG23.AS1.I1.C2654	MC20.MG24.AS1.I1.C5079	MC20.MG25.AS1.I16.R34067			MC20.MG28.AS1.I17.R30200	MC20.MG37.AS1.I24.R16289				MC20.MG36.AS1.I1.C2331
		MC20.MG18.AS1.I11.R8277				MC20.MG20.AS1.I1.C6435															MC20.MG31.AS1.I1.C2471	MC20.MG30.AS1.I1.C2899			MC20.MG22.AS1.I22.R40854	MC20.MG23.AS1.I1.C2655	MC20.MG24.AS1.I1.C5089	MC20.MG25.AS1.I16.R34109			MC20.MG28.AS1.I17.R30239	MC20.MG37.AS1.I24.R16335				MC20.MG36.AS1.I1.C2332
		MC20.MG18.AS1.I11.R8663				MC20.MG20.AS1.I1.C6451															MC20.MG31.AS1.I1.C248	MC20.MG30.AS1.I1.C2900			MC20.MG22.AS1.I22.R40936	MC20.MG23.AS1.I1.C2674	MC20.MG24.AS1.I1.C5116	MC20.MG25.AS1.I16.R34113			MC20.MG28.AS1.I17.R3046	MC20.MG37.AS1.I24.R16385				MC20.MG36.AS1.I1.C2333
		MC20.MG18.AS1.I11.R8781				MC20.MG20.AS1.I1.C6471															MC20.MG31.AS1.I1.C249	MC20.MG30.AS1.I1.C2901			MC20.MG22.AS1.I22.R40971	MC20.MG23.AS1.I1.C2683	MC20.MG24.AS1.I1.C5168	MC20.MG25.AS1.I16.R34185			MC20.MG28.AS1.I17.R30540	MC20.MG37.AS1.I24.R16718				MC20.MG36.AS1.I1.C2362
		MC20.MG18.AS1.I11.R9031				MC20.MG20.AS1.I1.C6481															MC20.MG31.AS1.I1.C250	MC20.MG30.AS1.I1.C292			MC20.MG22.AS1.I22.R41027	MC20.MG23.AS1.I1.C2709	MC20.MG24.AS1.I1.C5177	MC20.MG25.AS1.I16.R34187			MC20.MG28.AS1.I17.R30567	MC20.MG37.AS1.I24.R16768				MC20.MG36.AS1.I1.C2363
		MC20.MG18.AS1.I11.R927				MC20.MG20.AS1.I1.C6510															MC20.MG31.AS1.I1.C251	MC20.MG30.AS1.I1.C293			MC20.MG22.AS1.I22.R41115	MC20.MG23.AS1.I1.C2754	MC20.MG24.AS1.I1.C5192	MC20.MG25.AS1.I16.R34247			MC20.MG28.AS1.I17.R30627	MC20.MG37.AS1.I24.R16856				MC20.MG36.AS1.I1.C2364
		MC20.MG18.AS1.I11.R928				MC20.MG20.AS1.I1.C6517															MC20.MG31.AS1.I1.C252	MC20.MG30.AS1.I1.C294			MC20.MG22.AS1.I22.R41550	MC20.MG23.AS1.I1.C2762	MC20.MG24.AS1.I1.C5200	MC20.MG25.AS1.I16.R3431			MC20.MG28.AS1.I17.R30709	MC20.MG37.AS1.I24.R16994				MC20.MG36.AS1.I1.C2485
		MC20.MG18.AS1.I11.R9304				MC20.MG20.AS1.I1.C6536															MC20.MG31.AS1.I1.C2529	MC20.MG30.AS1.I1.C295			MC20.MG22.AS1.I22.R41644	MC20.MG23.AS1.I1.C2781	MC20.MG24.AS1.I1.C5215	MC20.MG25.AS1.I16.R34355			MC20.MG28.AS1.I17.R30757	MC20.MG37.AS1.I24.R17022				MC20.MG36.AS1.I1.C2487
		MC20.MG18.AS1.I11.R9346				MC20.MG20.AS1.I1.C6542															MC20.MG31.AS1.I1.C253	MC20.MG30.AS1.I1.C296			MC20.MG22.AS1.I22.R4216	MC20.MG23.AS1.I1.C2795	MC20.MG24.AS1.I1.C5219	MC20.MG25.AS1.I16.R34603			MC20.MG28.AS1.I17.R30786	MC20.MG37.AS1.I24.R17156				MC20.MG36.AS1.I1.C2488
		MC20.MG18.AS1.I11.R9658				MC20.MG20.AS1.I1.C6582															MC20.MG31.AS1.I1.C2530	MC20.MG30.AS1.I1.C297			MC20.MG22.AS1.I22.R42356	MC20.MG23.AS1.I1.C2796	MC20.MG24.AS1.I1.C5234	MC20.MG25.AS1.I16.R34768			MC20.MG28.AS1.I17.R30804	MC20.MG37.AS1.I24.R17194				MC20.MG36.AS1.I1.C2489
		MC20.MG18.AS1.I11.R9842				MC20.MG20.AS1.I1.C6607															MC20.MG31.AS1.I1.C254	MC20.MG30.AS1.I1.C298			MC20.MG22.AS1.I22.R42422	MC20.MG23.AS1.I1.C2800	MC20.MG24.AS1.I1.C5253	MC20.MG25.AS1.I16.R35012			MC20.MG28.AS1.I17.R31086	MC20.MG37.AS1.I24.R17247				MC20.MG36.AS1.I1.C2490
		MC20.MG18.AS1.I11.R9906				MC20.MG20.AS1.I1.C6665															MC20.MG31.AS1.I1.C255	MC20.MG30.AS1.I1.C3062			MC20.MG22.AS1.I22.R42602	MC20.MG23.AS1.I1.C2805	MC20.MG24.AS1.I1.C5278	MC20.MG25.AS1.I16.R3536			MC20.MG28.AS1.I17.R31131	MC20.MG37.AS1.I24.R17296				MC20.MG36.AS1.I1.C2491
		MC20.MG18.AS1.I2.C63				MC20.MG20.AS1.I1.C6695															MC20.MG31.AS1.I1.C2552	MC20.MG30.AS1.I1.C3063			MC20.MG22.AS1.I22.R42627	MC20.MG23.AS1.I1.C2809	MC20.MG24.AS1.I1.C5279	MC20.MG25.AS1.I16.R35408			MC20.MG28.AS1.I17.R31240	MC20.MG37.AS1.I24.R17458				MC20.MG36.AS1.I1.C2492
		MC20.MG18.AS1.I3.C9				MC20.MG20.AS1.I1.C6703															MC20.MG31.AS1.I1.C2553	MC20.MG30.AS1.I1.C3088			MC20.MG22.AS1.I22.R42658	MC20.MG23.AS1.I1.C2818	MC20.MG24.AS1.I1.C5290	MC20.MG25.AS1.I16.R35472			MC20.MG28.AS1.I17.R31254	MC20.MG37.AS1.I24.R1755				MC20.MG36.AS1.I1.C2493
		MC20.MG18.AS1.I4.C14				MC20.MG20.AS1.I1.C6729															MC20.MG31.AS1.I1.C2554	MC20.MG30.AS1.I1.C3089			MC20.MG22.AS1.I22.R42954	MC20.MG23.AS1.I1.C2819	MC20.MG24.AS1.I1.C5307	MC20.MG25.AS1.I16.R35667			MC20.MG28.AS1.I17.R31449	MC20.MG37.AS1.I24.R17601				MC20.MG36.AS1.I1.C2494
		MC20.MG18.AS1.I7.C31				MC20.MG20.AS1.I1.C6731															MC20.MG31.AS1.I1.C256	MC20.MG30.AS1.I1.C3090			MC20.MG22.AS1.I22.R43001	MC20.MG23.AS1.I1.C2839	MC20.MG24.AS1.I1.C5313	MC20.MG25.AS1.I16.R35680			MC20.MG28.AS1.I17.R31650	MC20.MG37.AS1.I24.R17612				MC20.MG36.AS1.I1.C2553
		MC20.MG18.AS1.I7.C32				MC20.MG20.AS1.I1.C6759															MC20.MG31.AS1.I1.C2571	MC20.MG30.AS1.I1.C3091			MC20.MG22.AS1.I22.R43011	MC20.MG23.AS1.I1.C2849	MC20.MG24.AS1.I1.C5343	MC20.MG25.AS1.I16.R35728			MC20.MG28.AS1.I17.R31686	MC20.MG37.AS1.I24.R17703				MC20.MG36.AS1.I1.C2554
		MC20.MG18.AS1.I7.C497				MC20.MG20.AS1.I1.C678															MC20.MG31.AS1.I1.C2572	MC20.MG30.AS1.I1.C3092			MC20.MG22.AS1.I22.R43075	MC20.MG23.AS1.I1.C287	MC20.MG24.AS1.I1.C5348	MC20.MG25.AS1.I16.R35744			MC20.MG28.AS1.I17.R31747	MC20.MG37.AS1.I24.R17857				MC20.MG36.AS1.I1.C2555
		MC20.MG18.AS1.I7.C498				MC20.MG20.AS1.I1.C679															MC20.MG31.AS1.I1.C2573	MC20.MG30.AS1.I1.C3093			MC20.MG22.AS1.I22.R43225	MC20.MG23.AS1.I1.C288	MC20.MG24.AS1.I1.C5361	MC20.MG25.AS1.I16.R35754			MC20.MG28.AS1.I17.R31958	MC20.MG37.AS1.I24.R17914				MC20.MG36.AS1.I1.C2556
		MC20.MG18.AS1.I7.C645				MC20.MG20.AS1.I1.C680															MC20.MG31.AS1.I1.C2597	MC20.MG30.AS1.I1.C3094			MC20.MG22.AS1.I22.R43243	MC20.MG23.AS1.I1.C2889	MC20.MG24.AS1.I1.C5401	MC20.MG25.AS1.I16.R3578			MC20.MG28.AS1.I17.R31992	MC20.MG37.AS1.I24.R17932				MC20.MG36.AS1.I1.C2557
		MC20.MG18.AS1.I7.C646				MC20.MG20.AS1.I1.C681															MC20.MG31.AS1.I1.C2611	MC20.MG30.AS1.I1.C3133			MC20.MG22.AS1.I22.R43286	MC20.MG23.AS1.I1.C289	MC20.MG24.AS1.I1.C5412	MC20.MG25.AS1.I16.R3581			MC20.MG28.AS1.I17.R31994	MC20.MG37.AS1.I24.R17973				MC20.MG36.AS1.I1.C2558
		MC20.MG18.AS1.I7.C765				MC20.MG20.AS1.I1.C682															MC20.MG31.AS1.I1.C2612	MC20.MG30.AS1.I1.C316			MC20.MG22.AS1.I22.R43293	MC20.MG23.AS1.I1.C2890	MC20.MG24.AS1.I1.C5431	MC20.MG25.AS1.I16.R36151			MC20.MG28.AS1.I17.R32095	MC20.MG37.AS1.I24.R18197				MC20.MG36.AS1.I1.C2559
		MC20.MG18.AS1.I7.C766				MC20.MG20.AS1.I1.C683															MC20.MG31.AS1.I1.C2614	MC20.MG30.AS1.I1.C317			MC20.MG22.AS1.I22.R4354	MC20.MG23.AS1.I1.C2898	MC20.MG24.AS1.I1.C5433	MC20.MG25.AS1.I16.R36455			MC20.MG28.AS1.I17.R32364	MC20.MG37.AS1.I24.R18337				MC20.MG36.AS1.I1.C2560
						MC20.MG20.AS1.I1.C6838															MC20.MG31.AS1.I1.C2654	MC20.MG30.AS1.I1.C318			MC20.MG22.AS1.I22.R43543	MC20.MG23.AS1.I1.C290	MC20.MG24.AS1.I1.C5437	MC20.MG25.AS1.I16.R36560			MC20.MG28.AS1.I17.R32448	MC20.MG37.AS1.I24.R18793				MC20.MG36.AS1.I1.C2599
						MC20.MG20.AS1.I1.C6852															MC20.MG31.AS1.I1.C2655	MC20.MG30.AS1.I1.C319			MC20.MG22.AS1.I22.R43582	MC20.MG23.AS1.I1.C291	MC20.MG24.AS1.I1.C5457	MC20.MG25.AS1.I16.R36637			MC20.MG28.AS1.I17.R32461	MC20.MG37.AS1.I24.R1887				MC20.MG36.AS1.I1.C2600
						MC20.MG20.AS1.I1.C6878															MC20.MG31.AS1.I1.C2656	MC20.MG30.AS1.I1.C320			MC20.MG22.AS1.I22.R43732	MC20.MG23.AS1.I1.C292	MC20.MG24.AS1.I1.C5510	MC20.MG25.AS1.I16.R36862			MC20.MG28.AS1.I17.R32516	MC20.MG37.AS1.I24.R18894				MC20.MG36.AS1.I1.C2601
						MC20.MG20.AS1.I1.C6917															MC20.MG31.AS1.I1.C2657	MC20.MG30.AS1.I1.C321			MC20.MG22.AS1.I22.R4385	MC20.MG23.AS1.I1.C2930	MC20.MG24.AS1.I1.C5533	MC20.MG25.AS1.I16.R36893			MC20.MG28.AS1.I17.R32593	MC20.MG37.AS1.I24.R18926				MC20.MG36.AS1.I1.C2602
						MC20.MG20.AS1.I1.C6925															MC20.MG31.AS1.I1.C2685	MC20.MG30.AS1.I1.C322			MC20.MG22.AS1.I22.R43866	MC20.MG23.AS1.I1.C2955	MC20.MG24.AS1.I1.C5537	MC20.MG25.AS1.I16.R36963			MC20.MG28.AS1.I17.R32708	MC20.MG37.AS1.I24.R18938				MC20.MG36.AS1.I1.C2640
						MC20.MG20.AS1.I1.C6954															MC20.MG31.AS1.I1.C2686	MC20.MG30.AS1.I1.C323			MC20.MG22.AS1.I22.R43897	MC20.MG23.AS1.I1.C2957	MC20.MG24.AS1.I1.C5565	MC20.MG25.AS1.I16.R37096			MC20.MG28.AS1.I17.R32804	MC20.MG37.AS1.I24.R19000				MC20.MG36.AS1.I1.C2641
						MC20.MG20.AS1.I1.C6965															MC20.MG31.AS1.I1.C2687	MC20.MG30.AS1.I1.C324			MC20.MG22.AS1.I22.R43930	MC20.MG23.AS1.I1.C2965	MC20.MG24.AS1.I1.C5570	MC20.MG25.AS1.I16.R37183			MC20.MG28.AS1.I17.R32824	MC20.MG37.AS1.I24.R19049				MC20.MG36.AS1.I1.C2642
						MC20.MG20.AS1.I1.C7019															MC20.MG31.AS1.I1.C2705	MC20.MG30.AS1.I1.C325			MC20.MG22.AS1.I22.R43956	MC20.MG23.AS1.I1.C2981	MC20.MG24.AS1.I1.C5571	MC20.MG25.AS1.I16.R37365			MC20.MG28.AS1.I17.R32920	MC20.MG37.AS1.I24.R19073				MC20.MG36.AS1.I1.C2643
						MC20.MG20.AS1.I1.C7027															MC20.MG31.AS1.I1.C2706	MC20.MG30.AS1.I1.C326			MC20.MG22.AS1.I22.R44095	MC20.MG23.AS1.I1.C2992	MC20.MG24.AS1.I1.C5572	MC20.MG25.AS1.I16.R37539			MC20.MG28.AS1.I17.R32939	MC20.MG37.AS1.I24.R19085				MC20.MG36.AS1.I1.C2644
						MC20.MG20.AS1.I1.C7072															MC20.MG31.AS1.I1.C2707	MC20.MG30.AS1.I1.C327			MC20.MG22.AS1.I22.R44134	MC20.MG23.AS1.I1.C3002	MC20.MG24.AS1.I1.C5614	MC20.MG25.AS1.I16.R3773			MC20.MG28.AS1.I17.R33087	MC20.MG37.AS1.I24.R19161				MC20.MG36.AS1.I1.C2645
						MC20.MG20.AS1.I1.C7084															MC20.MG31.AS1.I1.C2804	MC20.MG30.AS1.I1.C328			MC20.MG22.AS1.I22.R44166	MC20.MG23.AS1.I1.C3006	MC20.MG24.AS1.I1.C5615	MC20.MG25.AS1.I16.R37810			MC20.MG28.AS1.I17.R33091	MC20.MG37.AS1.I24.R19301				MC20.MG36.AS1.I1.C2663
						MC20.MG20.AS1.I1.C7086															MC20.MG31.AS1.I1.C2853	MC20.MG30.AS1.I1.C329			MC20.MG22.AS1.I22.R44640	MC20.MG23.AS1.I1.C3020	MC20.MG24.AS1.I1.C5623	MC20.MG25.AS1.I16.R37834			MC20.MG28.AS1.I17.R33452	MC20.MG37.AS1.I24.R19343				MC20.MG36.AS1.I1.C2664
						MC20.MG20.AS1.I1.C7100															MC20.MG31.AS1.I1.C2854	MC20.MG30.AS1.I1.C3322			MC20.MG22.AS1.I22.R44757	MC20.MG23.AS1.I1.C3024	MC20.MG24.AS1.I1.C5637	MC20.MG25.AS1.I16.R37908			MC20.MG28.AS1.I17.R33455	MC20.MG37.AS1.I24.R19380				MC20.MG36.AS1.I1.C2665
						MC20.MG20.AS1.I1.C7263															MC20.MG31.AS1.I1.C2855	MC20.MG30.AS1.I1.C3323			MC20.MG22.AS1.I22.R44880	MC20.MG23.AS1.I1.C3040	MC20.MG24.AS1.I1.C5689	MC20.MG25.AS1.I16.R37965			MC20.MG28.AS1.I17.R33653	MC20.MG37.AS1.I24.R19516				MC20.MG36.AS1.I1.C2687
						MC20.MG20.AS1.I1.C7265															MC20.MG31.AS1.I1.C2856	MC20.MG30.AS1.I1.C3324			MC20.MG22.AS1.I22.R45055	MC20.MG23.AS1.I1.C3043	MC20.MG24.AS1.I1.C5760	MC20.MG25.AS1.I16.R3801			MC20.MG28.AS1.I17.R33655	MC20.MG37.AS1.I24.R1955				MC20.MG36.AS1.I1.C2688
						MC20.MG20.AS1.I1.C7277															MC20.MG31.AS1.I1.C2861	MC20.MG30.AS1.I1.C3325			MC20.MG22.AS1.I22.R45126	MC20.MG23.AS1.I1.C3060	MC20.MG24.AS1.I1.C5761	MC20.MG25.AS1.I16.R38335			MC20.MG28.AS1.I17.R33674	MC20.MG37.AS1.I24.R19578				MC20.MG36.AS1.I1.C2689
						MC20.MG20.AS1.I1.C7299															MC20.MG31.AS1.I1.C2862	MC20.MG30.AS1.I1.C3375			MC20.MG22.AS1.I22.R45185	MC20.MG23.AS1.I1.C3088	MC20.MG24.AS1.I1.C5784	MC20.MG25.AS1.I16.R38566			MC20.MG28.AS1.I17.R33728	MC20.MG37.AS1.I24.R19592				MC20.MG36.AS1.I1.C2690
						MC20.MG20.AS1.I1.C7300															MC20.MG31.AS1.I1.C2863	MC20.MG30.AS1.I1.C3376			MC20.MG22.AS1.I22.R45306	MC20.MG23.AS1.I1.C3098	MC20.MG24.AS1.I1.C5796	MC20.MG25.AS1.I16.R3880			MC20.MG28.AS1.I17.R3376	MC20.MG37.AS1.I24.R19648				MC20.MG36.AS1.I1.C2700
						MC20.MG20.AS1.I1.C7314															MC20.MG31.AS1.I1.C2864	MC20.MG30.AS1.I1.C3437			MC20.MG22.AS1.I22.R454	MC20.MG23.AS1.I1.C3160	MC20.MG24.AS1.I1.C5822	MC20.MG25.AS1.I16.R39036			MC20.MG28.AS1.I17.R33825	MC20.MG37.AS1.I24.R19670				MC20.MG36.AS1.I1.C2701
						MC20.MG20.AS1.I1.C7323															MC20.MG31.AS1.I1.C2892	MC20.MG30.AS1.I1.C3438			MC20.MG22.AS1.I22.R45453	MC20.MG23.AS1.I1.C3161	MC20.MG24.AS1.I1.C5825	MC20.MG25.AS1.I16.R39076			MC20.MG28.AS1.I17.R33832	MC20.MG37.AS1.I24.R19834				MC20.MG36.AS1.I1.C2702
						MC20.MG20.AS1.I1.C7372															MC20.MG31.AS1.I1.C2893	MC20.MG30.AS1.I1.C3439			MC20.MG22.AS1.I22.R45506	MC20.MG23.AS1.I1.C3163	MC20.MG24.AS1.I1.C5846	MC20.MG25.AS1.I16.R3911			MC20.MG28.AS1.I17.R34049	MC20.MG37.AS1.I24.R19836				MC20.MG36.AS1.I1.C2704
						MC20.MG20.AS1.I1.C7431															MC20.MG31.AS1.I1.C2934	MC20.MG30.AS1.I1.C3440			MC20.MG22.AS1.I22.R45548	MC20.MG23.AS1.I1.C318	MC20.MG24.AS1.I1.C5859	MC20.MG25.AS1.I16.R39119			MC20.MG28.AS1.I17.R34068	MC20.MG37.AS1.I24.R19859				MC20.MG36.AS1.I1.C2705
						MC20.MG20.AS1.I1.C7433															MC20.MG31.AS1.I1.C2954	MC20.MG30.AS1.I1.C3495			MC20.MG22.AS1.I22.R45570	MC20.MG23.AS1.I1.C3180	MC20.MG24.AS1.I1.C5860	MC20.MG25.AS1.I16.R39193			MC20.MG28.AS1.I17.R34195	MC20.MG37.AS1.I24.R1989				MC20.MG36.AS1.I1.C2706
						MC20.MG20.AS1.I1.C7444															MC20.MG31.AS1.I1.C2955	MC20.MG30.AS1.I1.C3537			MC20.MG22.AS1.I22.R45572	MC20.MG23.AS1.I1.C3186	MC20.MG24.AS1.I1.C5870	MC20.MG25.AS1.I16.R39228			MC20.MG28.AS1.I17.R34279	MC20.MG37.AS1.I24.R19893				MC20.MG36.AS1.I1.C2707
						MC20.MG20.AS1.I1.C7532															MC20.MG31.AS1.I1.C2980	MC20.MG30.AS1.I1.C3551			MC20.MG22.AS1.I22.R4577	MC20.MG23.AS1.I1.C319	MC20.MG24.AS1.I1.C5878	MC20.MG25.AS1.I16.R39341			MC20.MG28.AS1.I17.R3431	MC20.MG37.AS1.I24.R20002				MC20.MG36.AS1.I1.C2708
						MC20.MG20.AS1.I1.C7535															MC20.MG31.AS1.I1.C2981	MC20.MG30.AS1.I1.C3635			MC20.MG22.AS1.I22.R45796	MC20.MG23.AS1.I1.C320	MC20.MG24.AS1.I1.C5885	MC20.MG25.AS1.I16.R39401			MC20.MG28.AS1.I17.R34350	MC20.MG37.AS1.I24.R20072				MC20.MG36.AS1.I1.C2709
						MC20.MG20.AS1.I1.C7555															MC20.MG31.AS1.I1.C2982	MC20.MG30.AS1.I1.C3636			MC20.MG22.AS1.I22.R45821	MC20.MG23.AS1.I1.C3226	MC20.MG24.AS1.I1.C5893	MC20.MG25.AS1.I16.R39514			MC20.MG28.AS1.I17.R34359	MC20.MG37.AS1.I24.R20111				MC20.MG36.AS1.I1.C2731
						MC20.MG20.AS1.I1.C7584															MC20.MG31.AS1.I1.C2983	MC20.MG30.AS1.I1.C3652			MC20.MG22.AS1.I22.R46039	MC20.MG23.AS1.I1.C3321	MC20.MG24.AS1.I1.C5896	MC20.MG25.AS1.I16.R397			MC20.MG28.AS1.I17.R34424	MC20.MG37.AS1.I24.R20135				MC20.MG36.AS1.I1.C2732
						MC20.MG20.AS1.I1.C7585															MC20.MG31.AS1.I1.C2984	MC20.MG30.AS1.I1.C3667			MC20.MG22.AS1.I22.R46078	MC20.MG23.AS1.I1.C3355	MC20.MG24.AS1.I1.C5902	MC20.MG25.AS1.I16.R39734			MC20.MG28.AS1.I17.R34468	MC20.MG37.AS1.I24.R20166				MC20.MG36.AS1.I1.C2733
						MC20.MG20.AS1.I1.C7597															MC20.MG31.AS1.I1.C2985	MC20.MG30.AS1.I1.C3668			MC20.MG22.AS1.I22.R46199	MC20.MG23.AS1.I1.C3381	MC20.MG24.AS1.I1.C5903	MC20.MG25.AS1.I16.R39772			MC20.MG28.AS1.I17.R34480	MC20.MG37.AS1.I24.R20177				MC20.MG36.AS1.I1.C2734
						MC20.MG20.AS1.I1.C7617															MC20.MG31.AS1.I1.C3005	MC20.MG30.AS1.I1.C3669			MC20.MG22.AS1.I22.R46223	MC20.MG23.AS1.I1.C3409	MC20.MG24.AS1.I1.C5905	MC20.MG25.AS1.I16.R39798			MC20.MG28.AS1.I17.R34509	MC20.MG37.AS1.I24.R20200				MC20.MG36.AS1.I1.C2736
						MC20.MG20.AS1.I1.C7657															MC20.MG31.AS1.I1.C3006	MC20.MG30.AS1.I1.C3670			MC20.MG22.AS1.I22.R46483	MC20.MG23.AS1.I1.C3435	MC20.MG24.AS1.I1.C5907	MC20.MG25.AS1.I16.R39856			MC20.MG28.AS1.I17.R34618	MC20.MG37.AS1.I24.R20201				MC20.MG36.AS1.I1.C2742
						MC20.MG20.AS1.I1.C7662															MC20.MG31.AS1.I1.C3060	MC20.MG30.AS1.I1.C3738			MC20.MG22.AS1.I22.R46798	MC20.MG23.AS1.I1.C3455	MC20.MG24.AS1.I1.C5908	MC20.MG25.AS1.I16.R3986			MC20.MG28.AS1.I17.R34648	MC20.MG37.AS1.I24.R2032				MC20.MG36.AS1.I1.C2743
						MC20.MG20.AS1.I1.C7672															MC20.MG31.AS1.I1.C3061	MC20.MG30.AS1.I1.C3739			MC20.MG22.AS1.I22.R46919	MC20.MG23.AS1.I1.C3478	MC20.MG24.AS1.I1.C5909	MC20.MG25.AS1.I16.R39861			MC20.MG28.AS1.I17.R34710	MC20.MG37.AS1.I24.R20400				MC20.MG36.AS1.I1.C2744
						MC20.MG20.AS1.I1.C7675															MC20.MG31.AS1.I1.C3062	MC20.MG30.AS1.I1.C3758			MC20.MG22.AS1.I22.R46960	MC20.MG23.AS1.I1.C3517	MC20.MG24.AS1.I1.C5922	MC20.MG25.AS1.I16.R40139			MC20.MG28.AS1.I17.R34711	MC20.MG37.AS1.I24.R20447				MC20.MG36.AS1.I1.C2745
						MC20.MG20.AS1.I1.C7687															MC20.MG31.AS1.I1.C3063	MC20.MG30.AS1.I1.C3775			MC20.MG22.AS1.I22.R46987	MC20.MG23.AS1.I1.C3559	MC20.MG24.AS1.I1.C5978	MC20.MG25.AS1.I16.R40205			MC20.MG28.AS1.I17.R34779	MC20.MG37.AS1.I24.R20476				MC20.MG36.AS1.I1.C2746
						MC20.MG20.AS1.I1.C7709															MC20.MG31.AS1.I1.C3069	MC20.MG30.AS1.I1.C3835			MC20.MG22.AS1.I22.R47226	MC20.MG23.AS1.I1.C3572	MC20.MG24.AS1.I1.C5989	MC20.MG25.AS1.I16.R40216			MC20.MG28.AS1.I17.R34793	MC20.MG37.AS1.I24.R20502				MC20.MG36.AS1.I1.C2755
						MC20.MG20.AS1.I1.C7711															MC20.MG31.AS1.I1.C3070	MC20.MG30.AS1.I1.C3899			MC20.MG22.AS1.I22.R47568	MC20.MG23.AS1.I1.C3598	MC20.MG24.AS1.I1.C6051	MC20.MG25.AS1.I16.R40425			MC20.MG28.AS1.I17.R34815	MC20.MG37.AS1.I24.R20621				MC20.MG36.AS1.I1.C2756
						MC20.MG20.AS1.I1.C7717															MC20.MG31.AS1.I1.C3087	MC20.MG30.AS1.I1.C3900			MC20.MG22.AS1.I22.R47640	MC20.MG23.AS1.I1.C3613	MC20.MG24.AS1.I1.C6061	MC20.MG25.AS1.I16.R40548			MC20.MG28.AS1.I17.R34843	MC20.MG37.AS1.I24.R20772				MC20.MG36.AS1.I1.C2757
						MC20.MG20.AS1.I1.C7742															MC20.MG31.AS1.I1.C3088	MC20.MG30.AS1.I1.C3956			MC20.MG22.AS1.I22.R4766	MC20.MG23.AS1.I1.C3649	MC20.MG24.AS1.I1.C6065	MC20.MG25.AS1.I16.R40662			MC20.MG28.AS1.I17.R34858	MC20.MG37.AS1.I24.R20785				MC20.MG36.AS1.I1.C2758
						MC20.MG20.AS1.I1.C7775															MC20.MG31.AS1.I1.C3089	MC20.MG30.AS1.I1.C3957			MC20.MG22.AS1.I22.R47783	MC20.MG23.AS1.I1.C368	MC20.MG24.AS1.I1.C6067	MC20.MG25.AS1.I16.R4072			MC20.MG28.AS1.I17.R34898	MC20.MG37.AS1.I24.R20972				MC20.MG36.AS1.I1.C2759
						MC20.MG20.AS1.I1.C7870															MC20.MG31.AS1.I1.C3095	MC20.MG30.AS1.I1.C4021			MC20.MG22.AS1.I22.R4779	MC20.MG23.AS1.I1.C369	MC20.MG24.AS1.I1.C6076	MC20.MG25.AS1.I16.R40977			MC20.MG28.AS1.I17.R35022	MC20.MG37.AS1.I24.R2113				MC20.MG36.AS1.I1.C2829
						MC20.MG20.AS1.I1.C7872															MC20.MG31.AS1.I1.C3096	MC20.MG30.AS1.I1.C4022			MC20.MG22.AS1.I22.R47791	MC20.MG23.AS1.I1.C370	MC20.MG24.AS1.I1.C6105	MC20.MG25.AS1.I16.R41194			MC20.MG28.AS1.I17.R35126	MC20.MG37.AS1.I24.R21222				MC20.MG36.AS1.I1.C2830
						MC20.MG20.AS1.I1.C7891															MC20.MG31.AS1.I1.C3097	MC20.MG30.AS1.I1.C4068			MC20.MG22.AS1.I22.R47800	MC20.MG23.AS1.I1.C3703	MC20.MG24.AS1.I1.C6109	MC20.MG25.AS1.I16.R41409			MC20.MG28.AS1.I17.R35150	MC20.MG37.AS1.I24.R21322				MC20.MG36.AS1.I1.C2847
						MC20.MG20.AS1.I1.C7976															MC20.MG31.AS1.I1.C3156	MC20.MG30.AS1.I1.C4069			MC20.MG22.AS1.I22.R47830	MC20.MG23.AS1.I1.C371	MC20.MG24.AS1.I1.C6120	MC20.MG25.AS1.I16.R41457			MC20.MG28.AS1.I17.R35301	MC20.MG37.AS1.I24.R21336				MC20.MG36.AS1.I1.C2848
						MC20.MG20.AS1.I1.C799															MC20.MG31.AS1.I1.C3157	MC20.MG30.AS1.I1.C4070			MC20.MG22.AS1.I22.R4802	MC20.MG23.AS1.I1.C372	MC20.MG24.AS1.I1.C6133	MC20.MG25.AS1.I16.R41464			MC20.MG28.AS1.I17.R35417	MC20.MG37.AS1.I24.R21500				MC20.MG36.AS1.I1.C2849
						MC20.MG20.AS1.I1.C7993															MC20.MG31.AS1.I1.C3158	MC20.MG30.AS1.I1.C4099			MC20.MG22.AS1.I22.R48067	MC20.MG23.AS1.I1.C3724	MC20.MG24.AS1.I1.C6146	MC20.MG25.AS1.I16.R41509			MC20.MG28.AS1.I17.R35440	MC20.MG37.AS1.I24.R21561				MC20.MG36.AS1.I1.C2850
						MC20.MG20.AS1.I1.C7994															MC20.MG31.AS1.I1.C3159	MC20.MG30.AS1.I1.C4100			MC20.MG22.AS1.I22.R48344	MC20.MG23.AS1.I1.C373	MC20.MG24.AS1.I1.C6179	MC20.MG25.AS1.I16.R41643			MC20.MG28.AS1.I17.R35511	MC20.MG37.AS1.I24.R2168				MC20.MG36.AS1.I1.C2851
						MC20.MG20.AS1.I1.C7996															MC20.MG31.AS1.I1.C3169	MC20.MG30.AS1.I1.C4132			MC20.MG22.AS1.I22.R48485	MC20.MG23.AS1.I1.C374	MC20.MG24.AS1.I1.C6181	MC20.MG25.AS1.I16.R41922			MC20.MG28.AS1.I17.R35583	MC20.MG37.AS1.I24.R21868				MC20.MG36.AS1.I1.C2852
						MC20.MG20.AS1.I1.C800															MC20.MG31.AS1.I1.C3170	MC20.MG30.AS1.I1.C4175			MC20.MG22.AS1.I22.R48500	MC20.MG23.AS1.I1.C3743	MC20.MG24.AS1.I1.C6194	MC20.MG25.AS1.I16.R4201			MC20.MG28.AS1.I17.R35725	MC20.MG37.AS1.I24.R21914				MC20.MG36.AS1.I1.C2853
						MC20.MG20.AS1.I1.C8001															MC20.MG31.AS1.I1.C3179	MC20.MG30.AS1.I1.C4176			MC20.MG22.AS1.I22.R48587	MC20.MG23.AS1.I1.C375	MC20.MG24.AS1.I1.C6208	MC20.MG25.AS1.I16.R42032			MC20.MG28.AS1.I17.R35775	MC20.MG37.AS1.I24.R2196				MC20.MG36.AS1.I1.C2854
						MC20.MG20.AS1.I1.C801															MC20.MG31.AS1.I1.C3180	MC20.MG30.AS1.I1.C4193			MC20.MG22.AS1.I22.R48643	MC20.MG23.AS1.I1.C3763	MC20.MG24.AS1.I1.C6229	MC20.MG25.AS1.I16.R42185			MC20.MG28.AS1.I17.R35841	MC20.MG37.AS1.I24.R22158				MC20.MG36.AS1.I1.C2855
						MC20.MG20.AS1.I1.C8010															MC20.MG31.AS1.I1.C3181	MC20.MG30.AS1.I1.C426			MC20.MG22.AS1.I22.R4880	MC20.MG23.AS1.I1.C3781	MC20.MG24.AS1.I1.C6234	MC20.MG25.AS1.I16.R42190			MC20.MG28.AS1.I17.R35967	MC20.MG37.AS1.I24.R22169				MC20.MG36.AS1.I1.C2987
						MC20.MG20.AS1.I1.C8014															MC20.MG31.AS1.I1.C3198	MC20.MG30.AS1.I1.C433			MC20.MG22.AS1.I22.R48955	MC20.MG23.AS1.I1.C3789	MC20.MG24.AS1.I1.C6247	MC20.MG25.AS1.I16.R4221			MC20.MG28.AS1.I17.R35999	MC20.MG37.AS1.I24.R22236				MC20.MG36.AS1.I1.C2988
						MC20.MG20.AS1.I1.C8017															MC20.MG31.AS1.I1.C3199	MC20.MG30.AS1.I1.C434			MC20.MG22.AS1.I22.R4896	MC20.MG23.AS1.I1.C379	MC20.MG24.AS1.I1.C6250	MC20.MG25.AS1.I16.R42296			MC20.MG28.AS1.I17.R36027	MC20.MG37.AS1.I24.R22299				MC20.MG36.AS1.I1.C2989
						MC20.MG20.AS1.I1.C8047															MC20.MG31.AS1.I1.C3200	MC20.MG30.AS1.I1.C435			MC20.MG22.AS1.I22.R49083	MC20.MG23.AS1.I1.C3870	MC20.MG24.AS1.I1.C6294	MC20.MG25.AS1.I16.R42812			MC20.MG28.AS1.I17.R36058	MC20.MG37.AS1.I24.R22337				MC20.MG36.AS1.I1.C2990
						MC20.MG20.AS1.I1.C8048															MC20.MG31.AS1.I1.C3201	MC20.MG30.AS1.I1.C436			MC20.MG22.AS1.I22.R49215	MC20.MG23.AS1.I1.C389	MC20.MG24.AS1.I1.C6308	MC20.MG25.AS1.I16.R42846			MC20.MG28.AS1.I17.R36116	MC20.MG37.AS1.I24.R22339				MC20.MG36.AS1.I1.C3014
						MC20.MG20.AS1.I1.C8051															MC20.MG31.AS1.I1.C3222	MC20.MG30.AS1.I1.C437			MC20.MG22.AS1.I22.R49605	MC20.MG23.AS1.I1.C3893	MC20.MG24.AS1.I1.C6309	MC20.MG25.AS1.I16.R42945			MC20.MG28.AS1.I17.R36131	MC20.MG37.AS1.I24.R22371				MC20.MG36.AS1.I1.C3015
						MC20.MG20.AS1.I1.C8071															MC20.MG31.AS1.I1.C3223	MC20.MG30.AS1.I1.C4373			MC20.MG22.AS1.I22.R49633	MC20.MG23.AS1.I1.C390	MC20.MG24.AS1.I1.C6330	MC20.MG25.AS1.I16.R43015			MC20.MG28.AS1.I17.R3631	MC20.MG37.AS1.I24.R22419				MC20.MG36.AS1.I1.C3016
						MC20.MG20.AS1.I1.C8106															MC20.MG31.AS1.I1.C3224	MC20.MG30.AS1.I1.C4374			MC20.MG22.AS1.I22.R49691	MC20.MG23.AS1.I1.C3900	MC20.MG24.AS1.I1.C6357	MC20.MG25.AS1.I16.R43026			MC20.MG28.AS1.I17.R36327	MC20.MG37.AS1.I24.R22695				MC20.MG36.AS1.I1.C3017
						MC20.MG20.AS1.I1.C8107															MC20.MG31.AS1.I1.C3225	MC20.MG30.AS1.I1.C438			MC20.MG22.AS1.I22.R49699	MC20.MG23.AS1.I1.C391	MC20.MG24.AS1.I1.C6358	MC20.MG25.AS1.I16.R43117			MC20.MG28.AS1.I17.R36393	MC20.MG37.AS1.I24.R22736				MC20.MG36.AS1.I1.C3029
						MC20.MG20.AS1.I1.C8150															MC20.MG31.AS1.I1.C3284	MC20.MG30.AS1.I1.C439			MC20.MG22.AS1.I22.R4982	MC20.MG23.AS1.I1.C392	MC20.MG24.AS1.I1.C6362	MC20.MG25.AS1.I16.R43183			MC20.MG28.AS1.I17.R36463	MC20.MG37.AS1.I24.R22737				MC20.MG36.AS1.I1.C3030
						MC20.MG20.AS1.I1.C8294															MC20.MG31.AS1.I1.C3285	MC20.MG30.AS1.I1.C4503			MC20.MG22.AS1.I22.R49902	MC20.MG23.AS1.I1.C3924	MC20.MG24.AS1.I1.C6373	MC20.MG25.AS1.I16.R43287			MC20.MG28.AS1.I17.R3648	MC20.MG37.AS1.I24.R22923				MC20.MG36.AS1.I1.C3031
						MC20.MG20.AS1.I1.C8336															MC20.MG31.AS1.I1.C3286	MC20.MG30.AS1.I1.C4504			MC20.MG22.AS1.I22.R50132	MC20.MG23.AS1.I1.C3925	MC20.MG24.AS1.I1.C6376	MC20.MG25.AS1.I16.R43330			MC20.MG28.AS1.I17.R36482	MC20.MG37.AS1.I24.R23				MC20.MG36.AS1.I1.C3032
						MC20.MG20.AS1.I1.C8375															MC20.MG31.AS1.I1.C3339	MC20.MG30.AS1.I1.C4544			MC20.MG22.AS1.I22.R50335	MC20.MG23.AS1.I1.C393	MC20.MG24.AS1.I1.C6383	MC20.MG25.AS1.I16.R43377			MC20.MG28.AS1.I17.R36505	MC20.MG37.AS1.I24.R23017				MC20.MG36.AS1.I1.C3061
						MC20.MG20.AS1.I1.C8386															MC20.MG31.AS1.I1.C3340	MC20.MG30.AS1.I1.C4545			MC20.MG22.AS1.I22.R50431	MC20.MG23.AS1.I1.C394	MC20.MG24.AS1.I1.C6384	MC20.MG25.AS1.I16.R43475			MC20.MG28.AS1.I17.R3670	MC20.MG37.AS1.I24.R23047				MC20.MG36.AS1.I1.C3062
						MC20.MG20.AS1.I1.C8394															MC20.MG31.AS1.I1.C3341	MC20.MG30.AS1.I1.C4546			MC20.MG22.AS1.I22.R50445	MC20.MG23.AS1.I1.C398	MC20.MG24.AS1.I1.C6396	MC20.MG25.AS1.I16.R4363			MC20.MG28.AS1.I17.R36792	MC20.MG37.AS1.I24.R23253				MC20.MG36.AS1.I1.C3063
						MC20.MG20.AS1.I1.C842															MC20.MG31.AS1.I1.C3362	MC20.MG30.AS1.I1.C4751			MC20.MG22.AS1.I22.R50737	MC20.MG23.AS1.I1.C399	MC20.MG24.AS1.I1.C6405	MC20.MG25.AS1.I16.R43666			MC20.MG28.AS1.I17.R36943	MC20.MG37.AS1.I24.R23259				MC20.MG36.AS1.I1.C3093
						MC20.MG20.AS1.I1.C843															MC20.MG31.AS1.I1.C3363	MC20.MG30.AS1.I1.C477			MC20.MG22.AS1.I22.R50756	MC20.MG23.AS1.I1.C4118	MC20.MG24.AS1.I1.C6414	MC20.MG25.AS1.I16.R43741			MC20.MG28.AS1.I17.R37021	MC20.MG37.AS1.I24.R23275				MC20.MG36.AS1.I1.C3094
						MC20.MG20.AS1.I1.C8430															MC20.MG31.AS1.I1.C3364	MC20.MG30.AS1.I1.C478			MC20.MG22.AS1.I22.R50811	MC20.MG23.AS1.I1.C4165	MC20.MG24.AS1.I1.C6419	MC20.MG25.AS1.I16.R43820			MC20.MG28.AS1.I17.R37064	MC20.MG37.AS1.I24.R2335				MC20.MG36.AS1.I1.C3109
						MC20.MG20.AS1.I1.C844															MC20.MG31.AS1.I1.C3423	MC20.MG30.AS1.I1.C479			MC20.MG22.AS1.I22.R50865	MC20.MG23.AS1.I1.C4177	MC20.MG24.AS1.I1.C6453	MC20.MG25.AS1.I16.R43927			MC20.MG28.AS1.I17.R37101	MC20.MG37.AS1.I24.R23368				MC20.MG36.AS1.I1.C3110
						MC20.MG20.AS1.I1.C845															MC20.MG31.AS1.I1.C3424	MC20.MG30.AS1.I1.C480			MC20.MG22.AS1.I22.R50911	MC20.MG23.AS1.I1.C422	MC20.MG24.AS1.I1.C6455	MC20.MG25.AS1.I16.R44086			MC20.MG28.AS1.I17.R37169	MC20.MG37.AS1.I24.R23465				MC20.MG36.AS1.I1.C3111
						MC20.MG20.AS1.I1.C8452															MC20.MG31.AS1.I1.C3560	MC20.MG30.AS1.I1.C481			MC20.MG22.AS1.I22.R5109	MC20.MG23.AS1.I1.C4228	MC20.MG24.AS1.I1.C6466	MC20.MG25.AS1.I16.R44154			MC20.MG28.AS1.I17.R37188	MC20.MG37.AS1.I24.R23512				MC20.MG36.AS1.I1.C3112
						MC20.MG20.AS1.I1.C846															MC20.MG31.AS1.I1.C3561	MC20.MG30.AS1.I1.C4810			MC20.MG22.AS1.I22.R51119	MC20.MG23.AS1.I1.C423	MC20.MG24.AS1.I1.C6479	MC20.MG25.AS1.I16.R44446			MC20.MG28.AS1.I17.R37239	MC20.MG37.AS1.I24.R23530				MC20.MG36.AS1.I1.C3113
						MC20.MG20.AS1.I1.C8516															MC20.MG31.AS1.I1.C3562	MC20.MG30.AS1.I1.C4811			MC20.MG22.AS1.I22.R51120	MC20.MG23.AS1.I1.C424	MC20.MG24.AS1.I1.C6499	MC20.MG25.AS1.I16.R44735			MC20.MG28.AS1.I17.R37255	MC20.MG37.AS1.I24.R23549				MC20.MG36.AS1.I1.C3114
						MC20.MG20.AS1.I1.C8527															MC20.MG31.AS1.I1.C3574	MC20.MG30.AS1.I1.C482			MC20.MG22.AS1.I22.R51138	MC20.MG23.AS1.I1.C425	MC20.MG24.AS1.I1.C6533	MC20.MG25.AS1.I16.R44773			MC20.MG28.AS1.I17.R37289	MC20.MG37.AS1.I24.R23610				MC20.MG36.AS1.I1.C3115
						MC20.MG20.AS1.I1.C8608															MC20.MG31.AS1.I1.C3575	MC20.MG30.AS1.I1.C483			MC20.MG22.AS1.I22.R51218	MC20.MG23.AS1.I1.C4255	MC20.MG24.AS1.I1.C6549	MC20.MG25.AS1.I16.R44793			MC20.MG28.AS1.I17.R3754	MC20.MG37.AS1.I24.R23615				MC20.MG36.AS1.I1.C3139
						MC20.MG20.AS1.I1.C8612															MC20.MG31.AS1.I1.C3587	MC20.MG30.AS1.I1.C484			MC20.MG22.AS1.I22.R51229	MC20.MG23.AS1.I1.C426	MC20.MG24.AS1.I1.C6571	MC20.MG25.AS1.I16.R44969			MC20.MG28.AS1.I17.R37742	MC20.MG37.AS1.I24.R23791				MC20.MG36.AS1.I1.C3140
						MC20.MG20.AS1.I1.C8627															MC20.MG31.AS1.I1.C3627	MC20.MG30.AS1.I1.C4841			MC20.MG22.AS1.I22.R51338	MC20.MG23.AS1.I1.C4274	MC20.MG24.AS1.I1.C6682	MC20.MG25.AS1.I16.R45007			MC20.MG28.AS1.I17.R37896	MC20.MG37.AS1.I24.R23827				MC20.MG36.AS1.I1.C3141
						MC20.MG20.AS1.I1.C8659															MC20.MG31.AS1.I1.C3628	MC20.MG30.AS1.I1.C485			MC20.MG22.AS1.I22.R51618	MC20.MG23.AS1.I1.C4276	MC20.MG24.AS1.I1.C6730	MC20.MG25.AS1.I16.R45169			MC20.MG28.AS1.I17.R37943	MC20.MG37.AS1.I24.R23874				MC20.MG36.AS1.I1.C3142
						MC20.MG20.AS1.I1.C8697															MC20.MG31.AS1.I1.C3629	MC20.MG30.AS1.I1.C486			MC20.MG22.AS1.I22.R51710	MC20.MG23.AS1.I1.C4348	MC20.MG24.AS1.I1.C6735	MC20.MG25.AS1.I16.R45215			MC20.MG28.AS1.I17.R38070	MC20.MG37.AS1.I24.R2403				MC20.MG36.AS1.I1.C3143
						MC20.MG20.AS1.I1.C8846															MC20.MG31.AS1.I1.C3680	MC20.MG30.AS1.I1.C487			MC20.MG22.AS1.I22.R51723	MC20.MG23.AS1.I1.C437	MC20.MG24.AS1.I1.C6767	MC20.MG25.AS1.I16.R4525			MC20.MG28.AS1.I17.R38137	MC20.MG37.AS1.I24.R24037				MC20.MG36.AS1.I1.C3188
						MC20.MG20.AS1.I1.C8863															MC20.MG31.AS1.I1.C3681	MC20.MG30.AS1.I1.C488			MC20.MG22.AS1.I22.R51891	MC20.MG23.AS1.I1.C438	MC20.MG24.AS1.I1.C6775	MC20.MG25.AS1.I16.R45262			MC20.MG28.AS1.I17.R38180	MC20.MG37.AS1.I24.R24076				MC20.MG36.AS1.I1.C3189
						MC20.MG20.AS1.I1.C8867															MC20.MG31.AS1.I1.C3682	MC20.MG30.AS1.I1.C489			MC20.MG22.AS1.I22.R52037	MC20.MG23.AS1.I1.C4380	MC20.MG24.AS1.I1.C6800	MC20.MG25.AS1.I16.R45348			MC20.MG28.AS1.I17.R38217	MC20.MG37.AS1.I24.R24145				MC20.MG36.AS1.I1.C3190
						MC20.MG20.AS1.I1.C8872															MC20.MG31.AS1.I1.C3686	MC20.MG30.AS1.I1.C5011			MC20.MG22.AS1.I22.R52046	MC20.MG23.AS1.I1.C439	MC20.MG24.AS1.I1.C6811	MC20.MG25.AS1.I16.R45623			MC20.MG28.AS1.I17.R38267	MC20.MG37.AS1.I24.R24165				MC20.MG36.AS1.I1.C3191
						MC20.MG20.AS1.I1.C8900															MC20.MG31.AS1.I1.C3687	MC20.MG30.AS1.I1.C508			MC20.MG22.AS1.I22.R52091	MC20.MG23.AS1.I1.C440	MC20.MG24.AS1.I1.C6814	MC20.MG25.AS1.I16.R45626			MC20.MG28.AS1.I17.R38323	MC20.MG37.AS1.I24.R24179				MC20.MG36.AS1.I1.C3192
						MC20.MG20.AS1.I1.C8903															MC20.MG31.AS1.I1.C3688	MC20.MG30.AS1.I1.C509			MC20.MG22.AS1.I22.R52270	MC20.MG23.AS1.I1.C4402	MC20.MG24.AS1.I1.C6856	MC20.MG25.AS1.I16.R45912			MC20.MG28.AS1.I17.R3842	MC20.MG37.AS1.I24.R24263				MC20.MG36.AS1.I1.C3308
						MC20.MG20.AS1.I1.C8904															MC20.MG31.AS1.I1.C3689	MC20.MG30.AS1.I1.C510			MC20.MG22.AS1.I22.R52393	MC20.MG23.AS1.I1.C4403	MC20.MG24.AS1.I1.C6869	MC20.MG25.AS1.I16.R45914			MC20.MG28.AS1.I17.R38611	MC20.MG37.AS1.I24.R24377				MC20.MG36.AS1.I1.C3334
						MC20.MG20.AS1.I1.C8928															MC20.MG31.AS1.I1.C3723	MC20.MG30.AS1.I1.C511			MC20.MG22.AS1.I22.R524	MC20.MG23.AS1.I1.C441	MC20.MG24.AS1.I1.C6873	MC20.MG25.AS1.I16.R45938			MC20.MG28.AS1.I17.R38723	MC20.MG37.AS1.I24.R2441				MC20.MG36.AS1.I1.C3335
						MC20.MG20.AS1.I1.C8946															MC20.MG31.AS1.I1.C3724	MC20.MG30.AS1.I1.C512			MC20.MG22.AS1.I22.R52417	MC20.MG23.AS1.I1.C4419	MC20.MG24.AS1.I1.C6929	MC20.MG25.AS1.I16.R4596			MC20.MG28.AS1.I17.R38808	MC20.MG37.AS1.I24.R24441				MC20.MG36.AS1.I1.C3336
						MC20.MG20.AS1.I1.C8951															MC20.MG31.AS1.I1.C3725	MC20.MG30.AS1.I1.C5150			MC20.MG22.AS1.I22.R52448	MC20.MG23.AS1.I1.C442	MC20.MG24.AS1.I1.C6977	MC20.MG25.AS1.I16.R45986			MC20.MG28.AS1.I17.R389	MC20.MG37.AS1.I24.R24504				MC20.MG36.AS1.I1.C3337
						MC20.MG20.AS1.I1.C8966															MC20.MG31.AS1.I1.C3734	MC20.MG30.AS1.I1.C5158			MC20.MG22.AS1.I22.R52470	MC20.MG23.AS1.I1.C443	MC20.MG24.AS1.I1.C6982	MC20.MG25.AS1.I16.R46058			MC20.MG28.AS1.I17.R38922	MC20.MG37.AS1.I24.R24526				MC20.MG36.AS1.I1.C3356
						MC20.MG20.AS1.I1.C8972															MC20.MG31.AS1.I1.C3735	MC20.MG30.AS1.I1.C5225			MC20.MG22.AS1.I22.R52511	MC20.MG23.AS1.I1.C452	MC20.MG24.AS1.I1.C7038	MC20.MG25.AS1.I16.R46251			MC20.MG28.AS1.I17.R38990	MC20.MG37.AS1.I24.R24578				MC20.MG36.AS1.I1.C3357
						MC20.MG20.AS1.I1.C8980															MC20.MG31.AS1.I1.C3736	MC20.MG30.AS1.I1.C5226			MC20.MG22.AS1.I22.R52577	MC20.MG23.AS1.I1.C4525	MC20.MG24.AS1.I1.C7043	MC20.MG25.AS1.I16.R46308			MC20.MG28.AS1.I17.R39021	MC20.MG37.AS1.I24.R2478				MC20.MG36.AS1.I1.C3358
						MC20.MG20.AS1.I1.C8987															MC20.MG31.AS1.I1.C3767	MC20.MG30.AS1.I1.C5227			MC20.MG22.AS1.I22.R52757	MC20.MG23.AS1.I1.C453	MC20.MG24.AS1.I1.C7103	MC20.MG25.AS1.I16.R46335			MC20.MG28.AS1.I17.R39172	MC20.MG37.AS1.I24.R24794				MC20.MG36.AS1.I1.C3407
						MC20.MG20.AS1.I1.C9010															MC20.MG31.AS1.I1.C3768	MC20.MG30.AS1.I1.C537			MC20.MG22.AS1.I22.R53028	MC20.MG23.AS1.I1.C454	MC20.MG24.AS1.I1.C7121	MC20.MG25.AS1.I16.R46584			MC20.MG28.AS1.I17.R39291	MC20.MG37.AS1.I24.R2482				MC20.MG36.AS1.I1.C3409
						MC20.MG20.AS1.I1.C9023															MC20.MG31.AS1.I1.C3795	MC20.MG30.AS1.I1.C538			MC20.MG22.AS1.I22.R53262	MC20.MG23.AS1.I1.C455	MC20.MG24.AS1.I1.C7152	MC20.MG25.AS1.I16.R46596			MC20.MG28.AS1.I17.R39334	MC20.MG37.AS1.I24.R24897				MC20.MG36.AS1.I1.C3410
						MC20.MG20.AS1.I1.C9028															MC20.MG31.AS1.I1.C3796	MC20.MG30.AS1.I1.C539			MC20.MG22.AS1.I22.R53266	MC20.MG23.AS1.I1.C4617	MC20.MG24.AS1.I1.C7170	MC20.MG25.AS1.I16.R46607			MC20.MG28.AS1.I17.R39338	MC20.MG37.AS1.I24.R25036				MC20.MG36.AS1.I1.C3411
						MC20.MG20.AS1.I1.C9090															MC20.MG31.AS1.I1.C3797	MC20.MG30.AS1.I1.C5398			MC20.MG22.AS1.I22.R5327	MC20.MG23.AS1.I1.C467	MC20.MG24.AS1.I1.C7248	MC20.MG25.AS1.I16.R46613			MC20.MG28.AS1.I17.R3934	MC20.MG37.AS1.I24.R25143				MC20.MG36.AS1.I1.C3515
						MC20.MG20.AS1.I1.C9188															MC20.MG31.AS1.I1.C3858	MC20.MG30.AS1.I1.C540			MC20.MG22.AS1.I22.R53283	MC20.MG23.AS1.I1.C468	MC20.MG24.AS1.I1.C7264	MC20.MG25.AS1.I16.R46718			MC20.MG28.AS1.I17.R39349	MC20.MG37.AS1.I24.R25183				MC20.MG36.AS1.I1.C3516
						MC20.MG20.AS1.I1.C9199															MC20.MG31.AS1.I1.C3859	MC20.MG30.AS1.I1.C541			MC20.MG22.AS1.I22.R53306	MC20.MG23.AS1.I1.C4689	MC20.MG24.AS1.I1.C7265	MC20.MG25.AS1.I16.R46926			MC20.MG28.AS1.I17.R39365	MC20.MG37.AS1.I24.R25192				MC20.MG36.AS1.I1.C3531
						MC20.MG20.AS1.I1.C9200															MC20.MG31.AS1.I1.C3860	MC20.MG30.AS1.I1.C542			MC20.MG22.AS1.I22.R53378	MC20.MG23.AS1.I1.C469	MC20.MG24.AS1.I1.C7298	MC20.MG25.AS1.I16.R47023			MC20.MG28.AS1.I17.R39414	MC20.MG37.AS1.I24.R25279				MC20.MG36.AS1.I1.C3532
						MC20.MG20.AS1.I1.C9222															MC20.MG31.AS1.I1.C3920	MC20.MG30.AS1.I1.C543			MC20.MG22.AS1.I22.R5354	MC20.MG23.AS1.I1.C470	MC20.MG24.AS1.I1.C7313	MC20.MG25.AS1.I16.R47053			MC20.MG28.AS1.I17.R39450	MC20.MG37.AS1.I24.R25288				MC20.MG36.AS1.I1.C3533
						MC20.MG20.AS1.I1.C9269															MC20.MG31.AS1.I1.C3921	MC20.MG30.AS1.I1.C544			MC20.MG22.AS1.I22.R53636	MC20.MG23.AS1.I1.C4710	MC20.MG24.AS1.I1.C7322	MC20.MG25.AS1.I16.R47054			MC20.MG28.AS1.I17.R39546	MC20.MG37.AS1.I24.R25344				MC20.MG36.AS1.I1.C3534
						MC20.MG20.AS1.I1.C9275															MC20.MG31.AS1.I1.C3922	MC20.MG30.AS1.I1.C545			MC20.MG22.AS1.I22.R53675	MC20.MG23.AS1.I1.C4713	MC20.MG24.AS1.I1.C7336	MC20.MG25.AS1.I16.R47146			MC20.MG28.AS1.I17.R3955	MC20.MG37.AS1.I24.R25361				MC20.MG36.AS1.I1.C370
						MC20.MG20.AS1.I1.C9277															MC20.MG31.AS1.I1.C3923	MC20.MG30.AS1.I1.C547			MC20.MG22.AS1.I22.R53707	MC20.MG23.AS1.I1.C4719	MC20.MG24.AS1.I1.C7352	MC20.MG25.AS1.I16.R47642			MC20.MG28.AS1.I17.R39633	MC20.MG37.AS1.I24.R25435				MC20.MG36.AS1.I1.C371
						MC20.MG20.AS1.I1.C9284															MC20.MG31.AS1.I1.C3924	MC20.MG30.AS1.I1.C549			MC20.MG22.AS1.I22.R53830	MC20.MG23.AS1.I1.C4777	MC20.MG24.AS1.I1.C7366	MC20.MG25.AS1.I16.R47665			MC20.MG28.AS1.I17.R39795	MC20.MG37.AS1.I24.R25462				MC20.MG36.AS1.I1.C372
						MC20.MG20.AS1.I1.C9290															MC20.MG31.AS1.I1.C3932	MC20.MG30.AS1.I1.C550			MC20.MG22.AS1.I22.R53866	MC20.MG23.AS1.I1.C4807	MC20.MG24.AS1.I1.C7385	MC20.MG25.AS1.I16.R47792			MC20.MG28.AS1.I17.R39808	MC20.MG37.AS1.I24.R25494				MC20.MG36.AS1.I1.C373
						MC20.MG20.AS1.I1.C9338															MC20.MG31.AS1.I1.C3933	MC20.MG30.AS1.I1.C551			MC20.MG22.AS1.I22.R53922	MC20.MG23.AS1.I1.C4859	MC20.MG24.AS1.I1.C7406	MC20.MG25.AS1.I16.R48007			MC20.MG28.AS1.I17.R39823	MC20.MG37.AS1.I24.R25625				MC20.MG36.AS1.I1.C374
						MC20.MG20.AS1.I1.C9340															MC20.MG31.AS1.I1.C3934	MC20.MG30.AS1.I1.C552			MC20.MG22.AS1.I22.R53956	MC20.MG23.AS1.I1.C487	MC20.MG24.AS1.I1.C7441	MC20.MG25.AS1.I16.R48008			MC20.MG28.AS1.I17.R40069	MC20.MG37.AS1.I24.R25686				MC20.MG36.AS1.I1.C375
						MC20.MG20.AS1.I1.C9343															MC20.MG31.AS1.I1.C3956	MC20.MG30.AS1.I1.C553			MC20.MG22.AS1.I22.R54010	MC20.MG23.AS1.I1.C488	MC20.MG24.AS1.I1.C7467	MC20.MG25.AS1.I16.R48106			MC20.MG28.AS1.I17.R40119	MC20.MG37.AS1.I24.R25741				MC20.MG36.AS1.I1.C376
						MC20.MG20.AS1.I1.C9346															MC20.MG31.AS1.I1.C3957	MC20.MG30.AS1.I1.C554			MC20.MG22.AS1.I22.R54013	MC20.MG23.AS1.I1.C4882	MC20.MG24.AS1.I1.C7480	MC20.MG25.AS1.I16.R48163			MC20.MG28.AS1.I17.R40123	MC20.MG37.AS1.I24.R25744				MC20.MG36.AS1.I1.C377
						MC20.MG20.AS1.I1.C9358															MC20.MG31.AS1.I1.C3958	MC20.MG30.AS1.I1.C555			MC20.MG22.AS1.I22.R54481	MC20.MG23.AS1.I1.C489	MC20.MG24.AS1.I1.C7504	MC20.MG25.AS1.I16.R4818			MC20.MG28.AS1.I17.R40211	MC20.MG37.AS1.I24.R25753				MC20.MG36.AS1.I1.C378
						MC20.MG20.AS1.I1.C9371															MC20.MG31.AS1.I1.C4124	MC20.MG30.AS1.I1.C556			MC20.MG22.AS1.I22.R54485	MC20.MG23.AS1.I1.C490	MC20.MG24.AS1.I1.C7546	MC20.MG25.AS1.I16.R48227			MC20.MG28.AS1.I17.R40281	MC20.MG37.AS1.I24.R25844				MC20.MG36.AS1.I1.C379
						MC20.MG20.AS1.I1.C9424															MC20.MG31.AS1.I1.C4125	MC20.MG30.AS1.I1.C5560			MC20.MG22.AS1.I22.R54600	MC20.MG23.AS1.I1.C491	MC20.MG24.AS1.I1.C7564	MC20.MG25.AS1.I16.R48294			MC20.MG28.AS1.I17.R40295	MC20.MG37.AS1.I24.R25848				MC20.MG36.AS1.I1.C380
						MC20.MG20.AS1.I1.C9436															MC20.MG31.AS1.I1.C4126	MC20.MG30.AS1.I1.C5674			MC20.MG22.AS1.I22.R54830	MC20.MG23.AS1.I1.C4917	MC20.MG24.AS1.I1.C7573	MC20.MG25.AS1.I16.R48310			MC20.MG28.AS1.I17.R40443	MC20.MG37.AS1.I24.R259				MC20.MG36.AS1.I1.C381
						MC20.MG20.AS1.I1.C9437															MC20.MG31.AS1.I1.C4156	MC20.MG30.AS1.I1.C587			MC20.MG22.AS1.I22.R54930	MC20.MG23.AS1.I1.C492	MC20.MG24.AS1.I1.C7622	MC20.MG25.AS1.I16.R48442			MC20.MG28.AS1.I17.R40459	MC20.MG37.AS1.I24.R26080				MC20.MG36.AS1.I1.C3812
						MC20.MG20.AS1.I1.C9442															MC20.MG31.AS1.I1.C4157	MC20.MG30.AS1.I1.C588			MC20.MG22.AS1.I22.R54978	MC20.MG23.AS1.I1.C4922	MC20.MG24.AS1.I1.C7632	MC20.MG25.AS1.I16.R48481			MC20.MG28.AS1.I17.R40552	MC20.MG37.AS1.I24.R26087				MC20.MG36.AS1.I1.C382
						MC20.MG20.AS1.I1.C9453															MC20.MG31.AS1.I1.C4163	MC20.MG30.AS1.I1.C589			MC20.MG22.AS1.I22.R55104	MC20.MG23.AS1.I1.C493	MC20.MG24.AS1.I1.C7662	MC20.MG25.AS1.I16.R48489			MC20.MG28.AS1.I17.R40628	MC20.MG37.AS1.I24.R26092				MC20.MG36.AS1.I1.C3866
						MC20.MG20.AS1.I1.C9461															MC20.MG31.AS1.I1.C4164	MC20.MG30.AS1.I1.C590			MC20.MG22.AS1.I22.R55299	MC20.MG23.AS1.I1.C494	MC20.MG24.AS1.I1.C7663	MC20.MG25.AS1.I16.R48967			MC20.MG28.AS1.I17.R40748	MC20.MG37.AS1.I24.R26301				MC20.MG36.AS1.I1.C3867
						MC20.MG20.AS1.I1.C9464															MC20.MG31.AS1.I1.C4165	MC20.MG30.AS1.I1.C591			MC20.MG22.AS1.I22.R55321	MC20.MG23.AS1.I1.C495	MC20.MG24.AS1.I1.C7731	MC20.MG25.AS1.I16.R48987			MC20.MG28.AS1.I17.R4081	MC20.MG37.AS1.I24.R2659				MC20.MG36.AS1.I1.C3868
						MC20.MG20.AS1.I1.C9476															MC20.MG31.AS1.I1.C4169	MC20.MG30.AS1.I1.C592			MC20.MG22.AS1.I22.R55400	MC20.MG23.AS1.I1.C4953	MC20.MG24.AS1.I1.C7747	MC20.MG25.AS1.I16.R49006			MC20.MG28.AS1.I17.R40854	MC20.MG37.AS1.I24.R26687				MC20.MG36.AS1.I1.C3869
						MC20.MG20.AS1.I1.C9504															MC20.MG31.AS1.I1.C4170	MC20.MG30.AS1.I1.C593			MC20.MG22.AS1.I22.R55530	MC20.MG23.AS1.I1.C496	MC20.MG24.AS1.I1.C7753	MC20.MG25.AS1.I16.R49017			MC20.MG28.AS1.I17.R41000	MC20.MG37.AS1.I24.R26696				MC20.MG36.AS1.I1.C3979
						MC20.MG20.AS1.I1.C9546															MC20.MG31.AS1.I1.C4200	MC20.MG30.AS1.I1.C594			MC20.MG22.AS1.I22.R55586	MC20.MG23.AS1.I1.C497	MC20.MG24.AS1.I1.C7766	MC20.MG25.AS1.I16.R49039			MC20.MG28.AS1.I17.R41007	MC20.MG37.AS1.I24.R26812				MC20.MG36.AS1.I1.C3980
						MC20.MG20.AS1.I1.C962															MC20.MG31.AS1.I1.C4201	MC20.MG30.AS1.I1.C595			MC20.MG22.AS1.I22.R5564	MC20.MG23.AS1.I1.C498	MC20.MG24.AS1.I1.C7811	MC20.MG25.AS1.I16.R49349			MC20.MG28.AS1.I17.R41071	MC20.MG37.AS1.I24.R27376				MC20.MG36.AS1.I1.C3981
						MC20.MG20.AS1.I1.C963															MC20.MG31.AS1.I1.C4202	MC20.MG30.AS1.I1.C596			MC20.MG22.AS1.I22.R55846	MC20.MG23.AS1.I1.C499	MC20.MG24.AS1.I1.C7829	MC20.MG25.AS1.I16.R49350			MC20.MG28.AS1.I17.R41150	MC20.MG37.AS1.I24.R27382				MC20.MG36.AS1.I1.C3982
						MC20.MG20.AS1.I1.C964															MC20.MG31.AS1.I1.C4227	MC20.MG30.AS1.I1.C597			MC20.MG22.AS1.I22.R55884	MC20.MG23.AS1.I1.C500	MC20.MG24.AS1.I1.C7831	MC20.MG25.AS1.I16.R4937			MC20.MG28.AS1.I17.R41266	MC20.MG37.AS1.I24.R27468				MC20.MG36.AS1.I1.C4003
						MC20.MG20.AS1.I1.C965															MC20.MG31.AS1.I1.C4228	MC20.MG30.AS1.I1.C6075			MC20.MG22.AS1.I22.R56004	MC20.MG23.AS1.I1.C5001	MC20.MG24.AS1.I1.C7905	MC20.MG25.AS1.I16.R49459			MC20.MG28.AS1.I17.R4135	MC20.MG37.AS1.I24.R27666				MC20.MG36.AS1.I1.C4004
						MC20.MG20.AS1.I1.C9676															MC20.MG31.AS1.I1.C4233	MC20.MG30.AS1.I1.C6117			MC20.MG22.AS1.I22.R56210	MC20.MG23.AS1.I1.C501	MC20.MG24.AS1.I1.C7918	MC20.MG25.AS1.I16.R49467			MC20.MG28.AS1.I17.R4138	MC20.MG37.AS1.I24.R27676				MC20.MG36.AS1.I1.C4101
						MC20.MG20.AS1.I1.C9703															MC20.MG31.AS1.I1.C4234	MC20.MG30.AS1.I1.C6275			MC20.MG22.AS1.I22.R56355	MC20.MG23.AS1.I1.C5055	MC20.MG24.AS1.I1.C7921	MC20.MG25.AS1.I16.R49552			MC20.MG28.AS1.I17.R41466	MC20.MG37.AS1.I24.R27804				MC20.MG36.AS1.I1.C4102
						MC20.MG20.AS1.I1.C9722															MC20.MG31.AS1.I1.C4235	MC20.MG30.AS1.I1.C629			MC20.MG22.AS1.I22.R56506	MC20.MG23.AS1.I1.C5057	MC20.MG24.AS1.I1.C7959	MC20.MG25.AS1.I16.R49606			MC20.MG28.AS1.I17.R41505	MC20.MG37.AS1.I24.R27831				MC20.MG36.AS1.I1.C4103
						MC20.MG20.AS1.I1.C9778															MC20.MG31.AS1.I1.C427	MC20.MG30.AS1.I1.C631			MC20.MG22.AS1.I22.R56532	MC20.MG23.AS1.I1.C510	MC20.MG24.AS1.I1.C7982	MC20.MG25.AS1.I16.R4966			MC20.MG28.AS1.I17.R41567	MC20.MG37.AS1.I24.R28109				MC20.MG36.AS1.I1.C414
						MC20.MG20.AS1.I1.C9797															MC20.MG31.AS1.I1.C429	MC20.MG30.AS1.I1.C632			MC20.MG22.AS1.I22.R56997	MC20.MG23.AS1.I1.C511	MC20.MG24.AS1.I1.C8001	MC20.MG25.AS1.I16.R4968			MC20.MG28.AS1.I17.R41784	MC20.MG37.AS1.I24.R28288				MC20.MG36.AS1.I1.C415
						MC20.MG20.AS1.I1.C9808															MC20.MG31.AS1.I1.C430	MC20.MG30.AS1.I1.C633			MC20.MG22.AS1.I22.R57084	MC20.MG23.AS1.I1.C512	MC20.MG24.AS1.I1.C8005	MC20.MG25.AS1.I16.R50033			MC20.MG28.AS1.I17.R41827	MC20.MG37.AS1.I24.R28428				MC20.MG36.AS1.I1.C416
						MC20.MG20.AS1.I1.C9932															MC20.MG31.AS1.I1.C4309	MC20.MG30.AS1.I1.C634			MC20.MG22.AS1.I22.R57628	MC20.MG23.AS1.I1.C513	MC20.MG24.AS1.I1.C8014	MC20.MG25.AS1.I16.R50067			MC20.MG28.AS1.I17.R41910	MC20.MG37.AS1.I24.R28474				MC20.MG36.AS1.I1.C417
						MC20.MG20.AS1.I1.C9970															MC20.MG31.AS1.I1.C431	MC20.MG30.AS1.I1.C635			MC20.MG22.AS1.I22.R57786	MC20.MG23.AS1.I1.C5134	MC20.MG24.AS1.I1.C8038	MC20.MG25.AS1.I16.R5026			MC20.MG28.AS1.I17.R41965	MC20.MG37.AS1.I24.R28524				MC20.MG36.AS1.I1.C4178
						MC20.MG20.AS1.I1.C9986															MC20.MG31.AS1.I1.C4310	MC20.MG30.AS1.I1.C636			MC20.MG22.AS1.I22.R57938	MC20.MG23.AS1.I1.C514	MC20.MG24.AS1.I1.C8048	MC20.MG25.AS1.I16.R50511			MC20.MG28.AS1.I17.R42079	MC20.MG37.AS1.I24.R28560				MC20.MG36.AS1.I1.C418
						MC20.MG20.AS1.I1.C9992															MC20.MG31.AS1.I1.C432	MC20.MG30.AS1.I1.C637			MC20.MG22.AS1.I22.R57952	MC20.MG23.AS1.I1.C515	MC20.MG24.AS1.I1.C8050	MC20.MG25.AS1.I16.R50536			MC20.MG28.AS1.I17.R42169	MC20.MG37.AS1.I24.R2858				MC20.MG36.AS1.I1.C419
						MC20.MG20.AS1.I10.C1															MC20.MG31.AS1.I1.C433	MC20.MG30.AS1.I1.C646			MC20.MG22.AS1.I22.R58039	MC20.MG23.AS1.I1.C5160	MC20.MG24.AS1.I1.C8068	MC20.MG25.AS1.I16.R50672			MC20.MG28.AS1.I17.R4226	MC20.MG37.AS1.I24.R28617				MC20.MG36.AS1.I1.C420
						MC20.MG20.AS1.I17.C175															MC20.MG31.AS1.I1.C4350	MC20.MG30.AS1.I1.C647			MC20.MG22.AS1.I22.R58109	MC20.MG23.AS1.I1.C5185	MC20.MG24.AS1.I1.C8070	MC20.MG25.AS1.I16.R50787			MC20.MG28.AS1.I17.R42463	MC20.MG37.AS1.I24.R28741				MC20.MG36.AS1.I1.C4202
						MC20.MG20.AS1.I17.C176															MC20.MG31.AS1.I1.C4351	MC20.MG30.AS1.I1.C648			MC20.MG22.AS1.I22.R58122	MC20.MG23.AS1.I1.C5205	MC20.MG24.AS1.I1.C8095	MC20.MG25.AS1.I16.R50803			MC20.MG28.AS1.I17.R42658	MC20.MG37.AS1.I24.R28807				MC20.MG36.AS1.I1.C4203
						MC20.MG20.AS1.I17.C251															MC20.MG31.AS1.I1.C4358	MC20.MG30.AS1.I1.C649			MC20.MG22.AS1.I22.R58377	MC20.MG23.AS1.I1.C5217	MC20.MG24.AS1.I1.C8100	MC20.MG25.AS1.I16.R50850			MC20.MG28.AS1.I17.R42705	MC20.MG37.AS1.I24.R28838				MC20.MG36.AS1.I1.C4204
						MC20.MG20.AS1.I17.C252															MC20.MG31.AS1.I1.C4359	MC20.MG30.AS1.I1.C650			MC20.MG22.AS1.I22.R58544	MC20.MG23.AS1.I1.C5218	MC20.MG24.AS1.I1.C8149	MC20.MG25.AS1.I16.R50881			MC20.MG28.AS1.I17.R4279	MC20.MG37.AS1.I24.R28842				MC20.MG36.AS1.I1.C421
						MC20.MG20.AS1.I17.C297															MC20.MG31.AS1.I1.C4360	MC20.MG30.AS1.I1.C6502			MC20.MG22.AS1.I22.R58557	MC20.MG23.AS1.I1.C5268	MC20.MG24.AS1.I1.C8167	MC20.MG25.AS1.I16.R5095			MC20.MG28.AS1.I17.R42791	MC20.MG37.AS1.I24.R28899				MC20.MG36.AS1.I1.C422
						MC20.MG20.AS1.I17.C298															MC20.MG31.AS1.I1.C4404	MC20.MG30.AS1.I1.C651			MC20.MG22.AS1.I22.R5859	MC20.MG23.AS1.I1.C5282	MC20.MG24.AS1.I1.C8179	MC20.MG25.AS1.I16.R51115			MC20.MG28.AS1.I17.R42941	MC20.MG37.AS1.I24.R28947				MC20.MG36.AS1.I1.C423
						MC20.MG20.AS1.I17.C319															MC20.MG31.AS1.I1.C4405	MC20.MG30.AS1.I1.C652			MC20.MG22.AS1.I22.R58661	MC20.MG23.AS1.I1.C529	MC20.MG24.AS1.I1.C8180	MC20.MG25.AS1.I16.R51184			MC20.MG28.AS1.I17.R43039	MC20.MG37.AS1.I24.R28969				MC20.MG36.AS1.I1.C424
						MC20.MG20.AS1.I17.C320															MC20.MG31.AS1.I1.C4437	MC20.MG30.AS1.I1.C653			MC20.MG22.AS1.I22.R58716	MC20.MG23.AS1.I1.C5299	MC20.MG24.AS1.I1.C8226	MC20.MG25.AS1.I16.R51234			MC20.MG28.AS1.I17.R43078	MC20.MG37.AS1.I24.R28997				MC20.MG36.AS1.I1.C425
						MC20.MG20.AS1.I17.C389															MC20.MG31.AS1.I1.C4438	MC20.MG30.AS1.I1.C654			MC20.MG22.AS1.I22.R58741	MC20.MG23.AS1.I1.C530	MC20.MG24.AS1.I1.C8285	MC20.MG25.AS1.I16.R51237			MC20.MG28.AS1.I17.R43106	MC20.MG37.AS1.I24.R29116				MC20.MG36.AS1.I1.C426
						MC20.MG20.AS1.I17.C390															MC20.MG31.AS1.I1.C4481	MC20.MG30.AS1.I1.C6668			MC20.MG22.AS1.I22.R58978	MC20.MG23.AS1.I1.C5307	MC20.MG24.AS1.I1.C8335	MC20.MG25.AS1.I16.R51355			MC20.MG28.AS1.I17.R43220	MC20.MG37.AS1.I24.R29242				MC20.MG36.AS1.I1.C4276
						MC20.MG20.AS1.I17.C517															MC20.MG31.AS1.I1.C4482	MC20.MG30.AS1.I1.C6889			MC20.MG22.AS1.I22.R59015	MC20.MG23.AS1.I1.C531	MC20.MG24.AS1.I1.C8373	MC20.MG25.AS1.I16.R51364			MC20.MG28.AS1.I17.R43297	MC20.MG37.AS1.I24.R29280				MC20.MG36.AS1.I1.C428
						MC20.MG20.AS1.I17.C518															MC20.MG31.AS1.I1.C4483	MC20.MG30.AS1.I1.C693			MC20.MG22.AS1.I22.R5902	MC20.MG23.AS1.I1.C5315	MC20.MG24.AS1.I1.C8380	MC20.MG25.AS1.I16.R5140			MC20.MG28.AS1.I17.R43364	MC20.MG37.AS1.I24.R2942				MC20.MG36.AS1.I1.C429
						MC20.MG20.AS1.I17.C541															MC20.MG31.AS1.I1.C4538	MC20.MG30.AS1.I1.C694			MC20.MG22.AS1.I22.R59149	MC20.MG23.AS1.I1.C532	MC20.MG24.AS1.I1.C8433	MC20.MG25.AS1.I16.R51539			MC20.MG28.AS1.I17.R43429	MC20.MG37.AS1.I24.R29473				MC20.MG36.AS1.I1.C430
						MC20.MG20.AS1.I17.C542															MC20.MG31.AS1.I1.C4539	MC20.MG30.AS1.I1.C695			MC20.MG22.AS1.I22.R5957	MC20.MG23.AS1.I1.C533	MC20.MG24.AS1.I1.C8444	MC20.MG25.AS1.I16.R51611			MC20.MG28.AS1.I17.R43471	MC20.MG37.AS1.I24.R2950				MC20.MG36.AS1.I1.C431
						MC20.MG20.AS1.I17.C596															MC20.MG31.AS1.I1.C4540	MC20.MG30.AS1.I1.C696			MC20.MG22.AS1.I22.R59705	MC20.MG23.AS1.I1.C534	MC20.MG24.AS1.I1.C8462	MC20.MG25.AS1.I16.R5175			MC20.MG28.AS1.I17.R43570	MC20.MG37.AS1.I24.R29527				MC20.MG36.AS1.I1.C432
						MC20.MG20.AS1.I17.C615															MC20.MG31.AS1.I1.C4541	MC20.MG30.AS1.I1.C697			MC20.MG22.AS1.I22.R59907	MC20.MG23.AS1.I1.C535	MC20.MG24.AS1.I1.C8467	MC20.MG25.AS1.I16.R51824			MC20.MG28.AS1.I17.R43630	MC20.MG37.AS1.I24.R29539				MC20.MG36.AS1.I1.C4331
						MC20.MG20.AS1.I17.C616															MC20.MG31.AS1.I1.C4542	MC20.MG30.AS1.I1.C698			MC20.MG22.AS1.I22.R60250	MC20.MG23.AS1.I1.C536	MC20.MG24.AS1.I1.C8520	MC20.MG25.AS1.I16.R51982			MC20.MG28.AS1.I17.R43825	MC20.MG37.AS1.I24.R29549				MC20.MG36.AS1.I1.C4332
						MC20.MG20.AS1.I17.C639															MC20.MG31.AS1.I1.C4563	MC20.MG30.AS1.I1.C699			MC20.MG22.AS1.I22.R60424	MC20.MG23.AS1.I1.C537	MC20.MG24.AS1.I1.C8522	MC20.MG25.AS1.I16.R51998			MC20.MG28.AS1.I17.R43896	MC20.MG37.AS1.I24.R29657				MC20.MG36.AS1.I1.C4333
						MC20.MG20.AS1.I17.C640															MC20.MG31.AS1.I1.C4564	MC20.MG30.AS1.I1.C700			MC20.MG22.AS1.I22.R60464	MC20.MG23.AS1.I1.C538	MC20.MG24.AS1.I1.C8525	MC20.MG25.AS1.I16.R52168			MC20.MG28.AS1.I17.R43917	MC20.MG37.AS1.I24.R29669				MC20.MG36.AS1.I1.C4334
						MC20.MG20.AS1.I17.C641															MC20.MG31.AS1.I1.C4565	MC20.MG30.AS1.I1.C701			MC20.MG22.AS1.I22.R60507	MC20.MG23.AS1.I1.C539	MC20.MG24.AS1.I1.C8542	MC20.MG25.AS1.I16.R52275			MC20.MG28.AS1.I17.R44140	MC20.MG37.AS1.I24.R29762				MC20.MG36.AS1.I1.C4336
						MC20.MG20.AS1.I17.C642															MC20.MG31.AS1.I1.C4572	MC20.MG30.AS1.I1.C702			MC20.MG22.AS1.I22.R60915	MC20.MG23.AS1.I1.C540	MC20.MG24.AS1.I1.C8578	MC20.MG25.AS1.I16.R52315			MC20.MG28.AS1.I17.R44164	MC20.MG37.AS1.I24.R29856				MC20.MG36.AS1.I1.C4337
						MC20.MG20.AS1.I17.C751															MC20.MG31.AS1.I1.C4573	MC20.MG30.AS1.I1.C703			MC20.MG22.AS1.I22.R61086	MC20.MG23.AS1.I1.C541	MC20.MG24.AS1.I1.C8591	MC20.MG25.AS1.I16.R52390			MC20.MG28.AS1.I17.R4423	MC20.MG37.AS1.I24.R2989				MC20.MG36.AS1.I1.C4338
						MC20.MG20.AS1.I17.C752															MC20.MG31.AS1.I1.C4604	MC20.MG30.AS1.I1.C704			MC20.MG22.AS1.I22.R61365	MC20.MG23.AS1.I1.C5413	MC20.MG24.AS1.I1.C8602	MC20.MG25.AS1.I16.R52468			MC20.MG28.AS1.I17.R44277	MC20.MG37.AS1.I24.R29962				MC20.MG36.AS1.I1.C4339
						MC20.MG20.AS1.I2.C16															MC20.MG31.AS1.I1.C4605	MC20.MG30.AS1.I1.C705			MC20.MG22.AS1.I22.R61396	MC20.MG23.AS1.I1.C5450	MC20.MG24.AS1.I1.C8687	MC20.MG25.AS1.I16.R5267			MC20.MG28.AS1.I17.R4432	MC20.MG37.AS1.I24.R29980				MC20.MG36.AS1.I1.C4357
						MC20.MG20.AS1.I2.C46															MC20.MG31.AS1.I1.C4606	MC20.MG30.AS1.I1.C706			MC20.MG22.AS1.I22.R6149	MC20.MG23.AS1.I1.C559	MC20.MG24.AS1.I1.C8701	MC20.MG25.AS1.I16.R52736			MC20.MG28.AS1.I17.R44353	MC20.MG37.AS1.I24.R30040				MC20.MG36.AS1.I1.C4368
						MC20.MG20.AS1.I2.C72															MC20.MG31.AS1.I1.C4731	MC20.MG30.AS1.I1.C707			MC20.MG22.AS1.I22.R61645	MC20.MG23.AS1.I1.C5598	MC20.MG24.AS1.I1.C8720	MC20.MG25.AS1.I16.R52750			MC20.MG28.AS1.I17.R44556	MC20.MG37.AS1.I24.R30060				MC20.MG36.AS1.I1.C4375
						MC20.MG20.AS1.I2.C93															MC20.MG31.AS1.I1.C4732	MC20.MG30.AS1.I1.C708			MC20.MG22.AS1.I22.R61650	MC20.MG23.AS1.I1.C560	MC20.MG24.AS1.I1.C8731	MC20.MG25.AS1.I16.R52865			MC20.MG28.AS1.I17.R44575	MC20.MG37.AS1.I24.R30202				MC20.MG36.AS1.I1.C4376
						MC20.MG20.AS1.I20.C33															MC20.MG31.AS1.I1.C4944	MC20.MG30.AS1.I1.C709			MC20.MG22.AS1.I22.R61654	MC20.MG23.AS1.I1.C564	MC20.MG24.AS1.I1.C8777	MC20.MG25.AS1.I16.R52878			MC20.MG28.AS1.I17.R44659	MC20.MG37.AS1.I24.R30315				MC20.MG36.AS1.I1.C4377
						MC20.MG20.AS1.I20.C34															MC20.MG31.AS1.I1.C4945	MC20.MG30.AS1.I1.C710			MC20.MG22.AS1.I22.R61688	MC20.MG23.AS1.I1.C565	MC20.MG24.AS1.I1.C8808	MC20.MG25.AS1.I16.R52987			MC20.MG28.AS1.I17.R44685	MC20.MG37.AS1.I24.R30324				MC20.MG36.AS1.I1.C4378
						MC20.MG20.AS1.I20.C51															MC20.MG31.AS1.I1.C4946	MC20.MG30.AS1.I1.C711			MC20.MG22.AS1.I22.R61722	MC20.MG23.AS1.I1.C566	MC20.MG24.AS1.I1.C8847	MC20.MG25.AS1.I16.R53042			MC20.MG28.AS1.I17.R44943	MC20.MG37.AS1.I24.R30343				MC20.MG36.AS1.I1.C4411
						MC20.MG20.AS1.I20.C52															MC20.MG31.AS1.I1.C4950	MC20.MG30.AS1.I1.C712			MC20.MG22.AS1.I22.R61822	MC20.MG23.AS1.I1.C567	MC20.MG24.AS1.I1.C8890	MC20.MG25.AS1.I16.R53101			MC20.MG28.AS1.I17.R45083	MC20.MG37.AS1.I24.R30487				MC20.MG36.AS1.I1.C4412
						MC20.MG20.AS1.I21.C19															MC20.MG31.AS1.I1.C4951	MC20.MG30.AS1.I1.C7198			MC20.MG22.AS1.I22.R62002	MC20.MG23.AS1.I1.C568	MC20.MG24.AS1.I1.C8917	MC20.MG25.AS1.I16.R53275			MC20.MG28.AS1.I17.R45091	MC20.MG37.AS1.I24.R30627				MC20.MG36.AS1.I1.C4413
						MC20.MG20.AS1.I21.C20															MC20.MG31.AS1.I1.C4952	MC20.MG30.AS1.I1.C746			MC20.MG22.AS1.I22.R62193	MC20.MG23.AS1.I1.C569	MC20.MG24.AS1.I1.C8922	MC20.MG25.AS1.I16.R53307			MC20.MG28.AS1.I17.R45112	MC20.MG37.AS1.I24.R30632				MC20.MG36.AS1.I1.C4437
						MC20.MG20.AS1.I21.C5															MC20.MG31.AS1.I1.C4998	MC20.MG30.AS1.I1.C7466			MC20.MG22.AS1.I22.R62208	MC20.MG23.AS1.I1.C570	MC20.MG24.AS1.I1.C8956	MC20.MG25.AS1.I16.R53392			MC20.MG28.AS1.I17.R45139	MC20.MG37.AS1.I24.R30778				MC20.MG36.AS1.I1.C4438
						MC20.MG20.AS1.I21.C55															MC20.MG31.AS1.I1.C5015	MC20.MG30.AS1.I1.C747			MC20.MG22.AS1.I22.R62216	MC20.MG23.AS1.I1.C571	MC20.MG24.AS1.I1.C896	MC20.MG25.AS1.I16.R53564			MC20.MG28.AS1.I17.R45186	MC20.MG37.AS1.I24.R30791				MC20.MG36.AS1.I1.C4439
						MC20.MG20.AS1.I21.C56															MC20.MG31.AS1.I1.C5019	MC20.MG30.AS1.I1.C748			MC20.MG22.AS1.I22.R62221	MC20.MG23.AS1.I1.C572	MC20.MG24.AS1.I1.C897	MC20.MG25.AS1.I16.R53627			MC20.MG28.AS1.I17.R45291	MC20.MG37.AS1.I24.R30879				MC20.MG36.AS1.I1.C4468
						MC20.MG20.AS1.I21.C6															MC20.MG31.AS1.I1.C5020	MC20.MG30.AS1.I1.C749			MC20.MG22.AS1.I22.R62399	MC20.MG23.AS1.I1.C573	MC20.MG24.AS1.I1.C898	MC20.MG25.AS1.I16.R53645			MC20.MG28.AS1.I17.R45473	MC20.MG37.AS1.I24.R31014				MC20.MG36.AS1.I1.C4469
						MC20.MG20.AS1.I22.R10066															MC20.MG31.AS1.I1.C5021	MC20.MG30.AS1.I1.C7494			MC20.MG22.AS1.I22.R62425	MC20.MG23.AS1.I1.C574	MC20.MG24.AS1.I1.C899	MC20.MG25.AS1.I16.R53865			MC20.MG28.AS1.I17.R45539	MC20.MG37.AS1.I24.R3110				MC20.MG36.AS1.I1.C4470
						MC20.MG20.AS1.I22.R10101															MC20.MG31.AS1.I1.C5076	MC20.MG30.AS1.I1.C750			MC20.MG22.AS1.I22.R62911	MC20.MG23.AS1.I1.C5740	MC20.MG24.AS1.I1.C900	MC20.MG25.AS1.I16.R53876			MC20.MG28.AS1.I17.R45595	MC20.MG37.AS1.I24.R31125				MC20.MG36.AS1.I1.C4522
						MC20.MG20.AS1.I22.R10146															MC20.MG31.AS1.I1.C5105	MC20.MG30.AS1.I1.C751			MC20.MG22.AS1.I22.R62997	MC20.MG23.AS1.I1.C5741	MC20.MG24.AS1.I1.C901	MC20.MG25.AS1.I16.R53911			MC20.MG28.AS1.I17.R45809	MC20.MG37.AS1.I24.R31234				MC20.MG36.AS1.I1.C4582
						MC20.MG20.AS1.I22.R10303															MC20.MG31.AS1.I1.C5107	MC20.MG30.AS1.I1.C752			MC20.MG22.AS1.I22.R63032	MC20.MG23.AS1.I1.C5799	MC20.MG24.AS1.I1.C9016	MC20.MG25.AS1.I16.R53975			MC20.MG28.AS1.I17.R45857	MC20.MG37.AS1.I24.R31281				MC20.MG36.AS1.I1.C4583
						MC20.MG20.AS1.I22.R10419															MC20.MG31.AS1.I1.C5108	MC20.MG30.AS1.I1.C753			MC20.MG22.AS1.I22.R63091	MC20.MG23.AS1.I1.C5849	MC20.MG24.AS1.I1.C9035	MC20.MG25.AS1.I16.R54053			MC20.MG28.AS1.I17.R46058	MC20.MG37.AS1.I24.R31469				MC20.MG36.AS1.I1.C4584
						MC20.MG20.AS1.I22.R10448															MC20.MG31.AS1.I1.C5109	MC20.MG30.AS1.I1.C754			MC20.MG22.AS1.I22.R63165	MC20.MG23.AS1.I1.C5873	MC20.MG24.AS1.I1.C9036	MC20.MG25.AS1.I16.R54204			MC20.MG28.AS1.I17.R46166	MC20.MG37.AS1.I24.R31500				MC20.MG36.AS1.I1.C4640
						MC20.MG20.AS1.I22.R10477															MC20.MG31.AS1.I1.C5134	MC20.MG30.AS1.I1.C755			MC20.MG22.AS1.I22.R63173	MC20.MG23.AS1.I1.C5923	MC20.MG24.AS1.I1.C9044	MC20.MG25.AS1.I16.R54242			MC20.MG28.AS1.I17.R46183	MC20.MG37.AS1.I24.R31575				MC20.MG36.AS1.I1.C4641
						MC20.MG20.AS1.I22.R10569															MC20.MG31.AS1.I1.C5142	MC20.MG30.AS1.I1.C756			MC20.MG22.AS1.I22.R63196	MC20.MG23.AS1.I1.C595	MC20.MG24.AS1.I1.C9045	MC20.MG25.AS1.I16.R54246			MC20.MG28.AS1.I17.R46225	MC20.MG37.AS1.I24.R31609				MC20.MG36.AS1.I1.C4642
						MC20.MG20.AS1.I22.R10594															MC20.MG31.AS1.I1.C5158	MC20.MG30.AS1.I1.C758			MC20.MG22.AS1.I22.R63249	MC20.MG23.AS1.I1.C596	MC20.MG24.AS1.I1.C9125	MC20.MG25.AS1.I16.R54332			MC20.MG28.AS1.I17.R46243	MC20.MG37.AS1.I24.R31621				MC20.MG36.AS1.I1.C4716
						MC20.MG20.AS1.I22.R1082															MC20.MG31.AS1.I1.C5182	MC20.MG30.AS1.I1.C759			MC20.MG22.AS1.I22.R63330	MC20.MG23.AS1.I1.C597	MC20.MG24.AS1.I1.C9251	MC20.MG25.AS1.I16.R54359			MC20.MG28.AS1.I17.R46485	MC20.MG37.AS1.I24.R31670				MC20.MG36.AS1.I1.C4717
						MC20.MG20.AS1.I22.R10901															MC20.MG31.AS1.I1.C5191	MC20.MG30.AS1.I1.C760			MC20.MG22.AS1.I22.R63514	MC20.MG23.AS1.I1.C598	MC20.MG24.AS1.I1.C9280	MC20.MG25.AS1.I16.R54479			MC20.MG28.AS1.I17.R4654	MC20.MG37.AS1.I24.R31746				MC20.MG36.AS1.I1.C4725
						MC20.MG20.AS1.I22.R10965															MC20.MG31.AS1.I1.C5215	MC20.MG30.AS1.I1.C761			MC20.MG22.AS1.I22.R63758	MC20.MG23.AS1.I1.C5983	MC20.MG24.AS1.I1.C9315	MC20.MG25.AS1.I16.R54580			MC20.MG28.AS1.I17.R46546	MC20.MG37.AS1.I24.R31775				MC20.MG36.AS1.I1.C4726
						MC20.MG20.AS1.I22.R11085															MC20.MG31.AS1.I1.C5255	MC20.MG30.AS1.I1.C762			MC20.MG22.AS1.I22.R63820	MC20.MG23.AS1.I1.C599	MC20.MG24.AS1.I1.C9367	MC20.MG25.AS1.I16.R54714			MC20.MG28.AS1.I17.R46557	MC20.MG37.AS1.I24.R31811				MC20.MG36.AS1.I1.C4727
						MC20.MG20.AS1.I22.R11109															MC20.MG31.AS1.I1.C5303	MC20.MG30.AS1.I1.C763			MC20.MG22.AS1.I22.R6411	MC20.MG23.AS1.I1.C5999	MC20.MG24.AS1.I1.C9372	MC20.MG25.AS1.I16.R54849			MC20.MG28.AS1.I17.R46595	MC20.MG37.AS1.I24.R31900				MC20.MG36.AS1.I1.C5033
						MC20.MG20.AS1.I22.R11134															MC20.MG31.AS1.I1.C5313	MC20.MG30.AS1.I1.C764			MC20.MG22.AS1.I22.R64157	MC20.MG23.AS1.I1.C6037	MC20.MG24.AS1.I1.C940	MC20.MG25.AS1.I16.R54936			MC20.MG28.AS1.I17.R46649	MC20.MG37.AS1.I24.R31904				MC20.MG36.AS1.I1.C5034
						MC20.MG20.AS1.I22.R11230															MC20.MG31.AS1.I1.C5399	MC20.MG30.AS1.I1.C765			MC20.MG22.AS1.I22.R64228	MC20.MG23.AS1.I1.C609	MC20.MG24.AS1.I1.C941	MC20.MG25.AS1.I16.R54937			MC20.MG28.AS1.I17.R46684	MC20.MG37.AS1.I24.R31928				MC20.MG36.AS1.I1.C5035
						MC20.MG20.AS1.I22.R11332															MC20.MG31.AS1.I1.C5417	MC20.MG30.AS1.I1.C766			MC20.MG22.AS1.I22.R64248	MC20.MG23.AS1.I1.C610	MC20.MG24.AS1.I1.C9411	MC20.MG25.AS1.I16.R55011			MC20.MG28.AS1.I17.R46708	MC20.MG37.AS1.I24.R31952				MC20.MG36.AS1.I1.C5076
						MC20.MG20.AS1.I22.R11341															MC20.MG31.AS1.I1.C5457	MC20.MG30.AS1.I1.C7740			MC20.MG22.AS1.I22.R64381	MC20.MG23.AS1.I1.C6103	MC20.MG24.AS1.I1.C942	MC20.MG25.AS1.I16.R55083			MC20.MG28.AS1.I17.R46739	MC20.MG37.AS1.I24.R31976				MC20.MG36.AS1.I1.C5082
						MC20.MG20.AS1.I22.R11463															MC20.MG31.AS1.I1.C5471	MC20.MG30.AS1.I1.C778			MC20.MG22.AS1.I22.R64590	MC20.MG23.AS1.I1.C611	MC20.MG24.AS1.I1.C9424	MC20.MG25.AS1.I16.R55135			MC20.MG28.AS1.I17.R46806	MC20.MG37.AS1.I24.R3204				MC20.MG36.AS1.I1.C5083
						MC20.MG20.AS1.I22.R11493															MC20.MG31.AS1.I1.C5474	MC20.MG30.AS1.I1.C779			MC20.MG22.AS1.I22.R6506	MC20.MG23.AS1.I1.C612	MC20.MG24.AS1.I1.C943	MC20.MG25.AS1.I16.R55252			MC20.MG28.AS1.I17.R46842	MC20.MG37.AS1.I24.R32050				MC20.MG36.AS1.I1.C509
						MC20.MG20.AS1.I22.R11562															MC20.MG31.AS1.I1.C5511	MC20.MG30.AS1.I1.C780			MC20.MG22.AS1.I22.R65075	MC20.MG23.AS1.I1.C6126	MC20.MG24.AS1.I1.C9486	MC20.MG25.AS1.I16.R55281			MC20.MG28.AS1.I17.R46916	MC20.MG37.AS1.I24.R32086				MC20.MG36.AS1.I1.C510
						MC20.MG20.AS1.I22.R11701															MC20.MG31.AS1.I1.C5526	MC20.MG30.AS1.I1.C781			MC20.MG22.AS1.I22.R6515	MC20.MG23.AS1.I1.C6135	MC20.MG24.AS1.I1.C9498	MC20.MG25.AS1.I16.R55284			MC20.MG28.AS1.I17.R46980	MC20.MG37.AS1.I24.R32107				MC20.MG36.AS1.I1.C511
						MC20.MG20.AS1.I22.R11736															MC20.MG31.AS1.I1.C5530	MC20.MG30.AS1.I1.C782			MC20.MG22.AS1.I22.R65416	MC20.MG23.AS1.I1.C6156	MC20.MG24.AS1.I1.C9513	MC20.MG25.AS1.I16.R55387			MC20.MG28.AS1.I17.R47044	MC20.MG37.AS1.I24.R32339				MC20.MG36.AS1.I1.C512
						MC20.MG20.AS1.I22.R11837															MC20.MG31.AS1.I1.C5564	MC20.MG30.AS1.I1.C783			MC20.MG22.AS1.I22.R65455	MC20.MG23.AS1.I1.C618	MC20.MG24.AS1.I1.C9530	MC20.MG25.AS1.I16.R55401			MC20.MG28.AS1.I17.R47092	MC20.MG37.AS1.I24.R32498				MC20.MG36.AS1.I1.C513
						MC20.MG20.AS1.I22.R11985															MC20.MG31.AS1.I1.C5573	MC20.MG30.AS1.I1.C784			MC20.MG22.AS1.I22.R65489	MC20.MG23.AS1.I1.C619	MC20.MG24.AS1.I1.C9565	MC20.MG25.AS1.I16.R55468			MC20.MG28.AS1.I17.R47114	MC20.MG37.AS1.I24.R32679				MC20.MG36.AS1.I1.C5131
						MC20.MG20.AS1.I22.R12065															MC20.MG31.AS1.I1.C5574	MC20.MG30.AS1.I1.C785			MC20.MG22.AS1.I22.R65585	MC20.MG23.AS1.I1.C620	MC20.MG24.AS1.I1.C9578	MC20.MG25.AS1.I16.R55803			MC20.MG28.AS1.I17.R47120	MC20.MG37.AS1.I24.R32764				MC20.MG36.AS1.I1.C5132
						MC20.MG20.AS1.I22.R12324															MC20.MG31.AS1.I1.C5577	MC20.MG30.AS1.I1.C786			MC20.MG22.AS1.I22.R65628	MC20.MG23.AS1.I1.C6206	MC20.MG24.AS1.I1.C9622	MC20.MG25.AS1.I16.R55846			MC20.MG28.AS1.I17.R4714	MC20.MG37.AS1.I24.R32842				MC20.MG36.AS1.I1.C5133
						MC20.MG20.AS1.I22.R12335															MC20.MG31.AS1.I1.C5607	MC20.MG30.AS1.I1.C787			MC20.MG22.AS1.I22.R65960	MC20.MG23.AS1.I1.C621	MC20.MG24.AS1.I1.C9671	MC20.MG25.AS1.I16.R55891			MC20.MG28.AS1.I17.R47201	MC20.MG37.AS1.I24.R32851				MC20.MG36.AS1.I1.C514
						MC20.MG20.AS1.I22.R12427															MC20.MG31.AS1.I1.C5610	MC20.MG30.AS1.I1.C7885			MC20.MG22.AS1.I22.R66258	MC20.MG23.AS1.I1.C622	MC20.MG24.AS1.I1.C9718	MC20.MG25.AS1.I16.R55991			MC20.MG28.AS1.I17.R47217	MC20.MG37.AS1.I24.R3287				MC20.MG36.AS1.I1.C5147
						MC20.MG20.AS1.I22.R12523															MC20.MG31.AS1.I1.C5621	MC20.MG30.AS1.I1.C794			MC20.MG22.AS1.I22.R66262	MC20.MG23.AS1.I1.C6249	MC20.MG24.AS1.I1.C9751	MC20.MG25.AS1.I16.R56089			MC20.MG28.AS1.I17.R47259	MC20.MG37.AS1.I24.R32905				MC20.MG36.AS1.I1.C5148
						MC20.MG20.AS1.I22.R12564															MC20.MG31.AS1.I1.C5629	MC20.MG30.AS1.I1.C795			MC20.MG22.AS1.I22.R66371	MC20.MG23.AS1.I1.C6280	MC20.MG24.AS1.I1.C9772	MC20.MG25.AS1.I16.R56094			MC20.MG28.AS1.I17.R4731	MC20.MG37.AS1.I24.R32907				MC20.MG36.AS1.I1.C515
						MC20.MG20.AS1.I22.R12593															MC20.MG31.AS1.I1.C5641	MC20.MG30.AS1.I1.C796			MC20.MG22.AS1.I22.R66484	MC20.MG23.AS1.I1.C629	MC20.MG24.AS1.I1.C9780	MC20.MG25.AS1.I16.R56134			MC20.MG28.AS1.I17.R47320	MC20.MG37.AS1.I24.R32940				MC20.MG36.AS1.I1.C516
						MC20.MG20.AS1.I22.R12638															MC20.MG31.AS1.I1.C5653	MC20.MG30.AS1.I1.C797			MC20.MG22.AS1.I22.R6687	MC20.MG23.AS1.I1.C630	MC20.MG24.AS1.I1.C9785	MC20.MG25.AS1.I16.R56259			MC20.MG28.AS1.I17.R47362	MC20.MG37.AS1.I24.R32953				MC20.MG36.AS1.I1.C517
						MC20.MG20.AS1.I22.R12657															MC20.MG31.AS1.I1.C5656	MC20.MG30.AS1.I1.C798			MC20.MG22.AS1.I22.R6761	MC20.MG23.AS1.I1.C631	MC20.MG24.AS1.I1.C9790	MC20.MG25.AS1.I16.R56382			MC20.MG28.AS1.I17.R47584	MC20.MG37.AS1.I24.R32959				MC20.MG36.AS1.I1.C5174
						MC20.MG20.AS1.I22.R12767															MC20.MG31.AS1.I1.C5702	MC20.MG30.AS1.I1.C799			MC20.MG22.AS1.I22.R6957	MC20.MG23.AS1.I1.C6315	MC20.MG24.AS1.I1.C9806	MC20.MG25.AS1.I16.R56435			MC20.MG28.AS1.I17.R47602	MC20.MG37.AS1.I24.R32978				MC20.MG36.AS1.I1.C5175
						MC20.MG20.AS1.I22.R12772															MC20.MG31.AS1.I1.C5723	MC20.MG30.AS1.I1.C818			MC20.MG22.AS1.I22.R6980	MC20.MG23.AS1.I1.C632	MC20.MG24.AS1.I1.C9853	MC20.MG25.AS1.I16.R56617			MC20.MG28.AS1.I17.R47628	MC20.MG37.AS1.I24.R32989				MC20.MG36.AS1.I1.C5176
						MC20.MG20.AS1.I22.R12781															MC20.MG31.AS1.I1.C5735	MC20.MG30.AS1.I1.C819			MC20.MG22.AS1.I22.R7147	MC20.MG23.AS1.I1.C633	MC20.MG24.AS1.I1.C9933	MC20.MG25.AS1.I16.R56758			MC20.MG28.AS1.I17.R47637	MC20.MG37.AS1.I24.R33052				MC20.MG36.AS1.I1.C5177
						MC20.MG20.AS1.I22.R1282															MC20.MG31.AS1.I1.C5744	MC20.MG30.AS1.I1.C820			MC20.MG22.AS1.I22.R7269	MC20.MG23.AS1.I1.C6331	MC20.MG24.AS1.I1.C9956	MC20.MG25.AS1.I16.R56794			MC20.MG28.AS1.I17.R47646	MC20.MG37.AS1.I24.R33153				MC20.MG36.AS1.I1.C518
						MC20.MG20.AS1.I22.R12888															MC20.MG31.AS1.I1.C5786	MC20.MG30.AS1.I1.C821			MC20.MG22.AS1.I22.R7340	MC20.MG23.AS1.I1.C634	MC20.MG24.AS1.I1.C9981	MC20.MG25.AS1.I16.R56843			MC20.MG28.AS1.I17.R47663	MC20.MG37.AS1.I24.R33258				MC20.MG36.AS1.I1.C519
						MC20.MG20.AS1.I22.R12976															MC20.MG31.AS1.I1.C5789	MC20.MG30.AS1.I1.C822			MC20.MG22.AS1.I22.R7527	MC20.MG23.AS1.I1.C635	MC20.MG24.AS1.I1.C9997	MC20.MG25.AS1.I16.R57132			MC20.MG28.AS1.I17.R47675	MC20.MG37.AS1.I24.R33501				MC20.MG36.AS1.I1.C520
						MC20.MG20.AS1.I22.R13050															MC20.MG31.AS1.I1.C5811	MC20.MG30.AS1.I1.C823			MC20.MG22.AS1.I22.R7901	MC20.MG23.AS1.I1.C636	MC20.MG24.AS1.I14.C1	MC20.MG25.AS1.I16.R57187			MC20.MG28.AS1.I17.R47683	MC20.MG37.AS1.I24.R33557				MC20.MG36.AS1.I1.C521
						MC20.MG20.AS1.I22.R1320															MC20.MG31.AS1.I1.C5824	MC20.MG30.AS1.I1.C825			MC20.MG22.AS1.I22.R7980	MC20.MG23.AS1.I1.C637	MC20.MG24.AS1.I18.C1	MC20.MG25.AS1.I16.R57287			MC20.MG28.AS1.I17.R47702	MC20.MG37.AS1.I24.R33569				MC20.MG36.AS1.I1.C5251
						MC20.MG20.AS1.I22.R1322															MC20.MG31.AS1.I1.C5849	MC20.MG30.AS1.I1.C826			MC20.MG22.AS1.I22.R7981	MC20.MG23.AS1.I1.C638	MC20.MG24.AS1.I2.C129	MC20.MG25.AS1.I16.R57704			MC20.MG28.AS1.I17.R47759	MC20.MG37.AS1.I24.R33644				MC20.MG36.AS1.I1.C5252
						MC20.MG20.AS1.I22.R13246															MC20.MG31.AS1.I1.C5863	MC20.MG30.AS1.I1.C827			MC20.MG22.AS1.I22.R7982	MC20.MG23.AS1.I1.C639	MC20.MG24.AS1.I2.C201	MC20.MG25.AS1.I16.R57740			MC20.MG28.AS1.I17.R47801	MC20.MG37.AS1.I24.R33703				MC20.MG36.AS1.I1.C5253
						MC20.MG20.AS1.I22.R13272															MC20.MG31.AS1.I1.C5871	MC20.MG30.AS1.I1.C828			MC20.MG22.AS1.I22.R7997	MC20.MG23.AS1.I1.C6395	MC20.MG24.AS1.I2.C22	MC20.MG25.AS1.I16.R57847			MC20.MG28.AS1.I17.R47825	MC20.MG37.AS1.I24.R3376				MC20.MG36.AS1.I1.C5257
						MC20.MG20.AS1.I22.R13346															MC20.MG31.AS1.I1.C5874	MC20.MG30.AS1.I1.C829			MC20.MG22.AS1.I22.R81	MC20.MG23.AS1.I1.C6413	MC20.MG24.AS1.I2.C57	MC20.MG25.AS1.I16.R58044			MC20.MG28.AS1.I17.R48001	MC20.MG37.AS1.I24.R33771				MC20.MG36.AS1.I1.C5258
						MC20.MG20.AS1.I22.R1353															MC20.MG31.AS1.I1.C5898	MC20.MG30.AS1.I1.C830			MC20.MG22.AS1.I22.R811	MC20.MG23.AS1.I1.C6437	MC20.MG24.AS1.I21.C139	MC20.MG25.AS1.I16.R58130			MC20.MG28.AS1.I17.R48004	MC20.MG37.AS1.I24.R3387				MC20.MG36.AS1.I1.C5259
						MC20.MG20.AS1.I22.R13563															MC20.MG31.AS1.I1.C6058	MC20.MG30.AS1.I1.C831			MC20.MG22.AS1.I22.R8125	MC20.MG23.AS1.I1.C6603	MC20.MG24.AS1.I21.C140	MC20.MG25.AS1.I16.R58181			MC20.MG28.AS1.I17.R48062	MC20.MG37.AS1.I24.R33960				MC20.MG36.AS1.I1.C5290
						MC20.MG20.AS1.I22.R13583															MC20.MG31.AS1.I1.C6064	MC20.MG30.AS1.I1.C832			MC20.MG22.AS1.I22.R8139	MC20.MG23.AS1.I1.C6612	MC20.MG24.AS1.I21.C149	MC20.MG25.AS1.I16.R58202			MC20.MG28.AS1.I17.R48096	MC20.MG37.AS1.I24.R33961				MC20.MG36.AS1.I1.C5291
						MC20.MG20.AS1.I22.R13595															MC20.MG31.AS1.I1.C6077	MC20.MG30.AS1.I1.C833			MC20.MG22.AS1.I22.R8156	MC20.MG23.AS1.I1.C665	MC20.MG24.AS1.I21.C150	MC20.MG25.AS1.I16.R58325			MC20.MG28.AS1.I17.R48347	MC20.MG37.AS1.I24.R33984				MC20.MG36.AS1.I1.C5331
						MC20.MG20.AS1.I22.R13648															MC20.MG31.AS1.I1.C6078	MC20.MG30.AS1.I1.C834			MC20.MG22.AS1.I22.R8158	MC20.MG23.AS1.I1.C666	MC20.MG24.AS1.I21.C237	MC20.MG25.AS1.I16.R58390			MC20.MG28.AS1.I17.R48363	MC20.MG37.AS1.I24.R34015				MC20.MG36.AS1.I1.C5332
						MC20.MG20.AS1.I22.R13666															MC20.MG31.AS1.I1.C6087	MC20.MG30.AS1.I1.C835			MC20.MG22.AS1.I22.R8159	MC20.MG23.AS1.I1.C6663	MC20.MG24.AS1.I21.C238	MC20.MG25.AS1.I16.R58555			MC20.MG28.AS1.I17.R48592	MC20.MG37.AS1.I24.R34117				MC20.MG36.AS1.I1.C5365
						MC20.MG20.AS1.I22.R13686															MC20.MG31.AS1.I1.C6101	MC20.MG30.AS1.I1.C8387			MC20.MG22.AS1.I22.R8237	MC20.MG23.AS1.I1.C667	MC20.MG24.AS1.I21.C27	MC20.MG25.AS1.I16.R58618			MC20.MG28.AS1.I17.R48663	MC20.MG37.AS1.I24.R34200				MC20.MG36.AS1.I1.C5463
						MC20.MG20.AS1.I22.R13849															MC20.MG31.AS1.I1.C6105	MC20.MG30.AS1.I1.C8488			MC20.MG22.AS1.I22.R8266	MC20.MG23.AS1.I1.C668	MC20.MG24.AS1.I21.C28	MC20.MG25.AS1.I16.R5879			MC20.MG28.AS1.I17.R48714	MC20.MG37.AS1.I24.R34211				MC20.MG36.AS1.I1.C5464
						MC20.MG20.AS1.I22.R1390															MC20.MG31.AS1.I1.C6137	MC20.MG30.AS1.I1.C8501			MC20.MG22.AS1.I22.R8291	MC20.MG23.AS1.I1.C6688	MC20.MG24.AS1.I21.C322	MC20.MG25.AS1.I16.R589			MC20.MG28.AS1.I17.R48740	MC20.MG37.AS1.I24.R34217				MC20.MG36.AS1.I1.C5465
						MC20.MG20.AS1.I22.R13979															MC20.MG31.AS1.I1.C6145	MC20.MG30.AS1.I1.C866			MC20.MG22.AS1.I22.R8313	MC20.MG23.AS1.I1.C6731	MC20.MG24.AS1.I21.C331	MC20.MG25.AS1.I16.R58943			MC20.MG28.AS1.I17.R48886	MC20.MG37.AS1.I24.R34238				MC20.MG36.AS1.I1.C5468
						MC20.MG20.AS1.I22.R14251															MC20.MG31.AS1.I1.C6164	MC20.MG30.AS1.I1.C867			MC20.MG22.AS1.I22.R8340	MC20.MG23.AS1.I1.C677	MC20.MG24.AS1.I21.C373	MC20.MG25.AS1.I16.R5905			MC20.MG28.AS1.I17.R48921	MC20.MG37.AS1.I24.R34282				MC20.MG36.AS1.I1.C5469
						MC20.MG20.AS1.I22.R1426															MC20.MG31.AS1.I1.C623	MC20.MG30.AS1.I1.C868			MC20.MG22.AS1.I22.R8381	MC20.MG23.AS1.I1.C6777	MC20.MG24.AS1.I21.C374	MC20.MG25.AS1.I16.R59444			MC20.MG28.AS1.I17.R49000	MC20.MG37.AS1.I24.R34304				MC20.MG36.AS1.I1.C5470
						MC20.MG20.AS1.I22.R14288															MC20.MG31.AS1.I1.C6231	MC20.MG30.AS1.I1.C869			MC20.MG22.AS1.I22.R8440	MC20.MG23.AS1.I1.C678	MC20.MG24.AS1.I21.C381	MC20.MG25.AS1.I16.R59557			MC20.MG28.AS1.I17.R49015	MC20.MG37.AS1.I24.R34593				MC20.MG36.AS1.I1.C5512
						MC20.MG20.AS1.I22.R14483															MC20.MG31.AS1.I1.C6232	MC20.MG30.AS1.I1.C870			MC20.MG22.AS1.I22.R8625	MC20.MG23.AS1.I1.C679	MC20.MG24.AS1.I21.C405	MC20.MG25.AS1.I16.R59558			MC20.MG28.AS1.I17.R4912	MC20.MG37.AS1.I24.R34864				MC20.MG36.AS1.I1.C5513
						MC20.MG20.AS1.I22.R14538															MC20.MG31.AS1.I1.C624	MC20.MG30.AS1.I1.C871			MC20.MG22.AS1.I22.R868	MC20.MG23.AS1.I1.C6813	MC20.MG24.AS1.I21.C406	MC20.MG25.AS1.I16.R59724			MC20.MG28.AS1.I17.R49141	MC20.MG37.AS1.I24.R34868				MC20.MG36.AS1.I1.C5514
						MC20.MG20.AS1.I22.R14548															MC20.MG31.AS1.I1.C6243	MC20.MG30.AS1.I1.C872			MC20.MG22.AS1.I22.R8716	MC20.MG23.AS1.I1.C6841	MC20.MG24.AS1.I21.C591	MC20.MG25.AS1.I16.R59826			MC20.MG28.AS1.I17.R49251	MC20.MG37.AS1.I24.R34902				MC20.MG36.AS1.I1.C5533
						MC20.MG20.AS1.I22.R14573															MC20.MG31.AS1.I1.C6248	MC20.MG30.AS1.I1.C873			MC20.MG22.AS1.I22.R8737	MC20.MG23.AS1.I1.C6843	MC20.MG24.AS1.I21.C592	MC20.MG25.AS1.I16.R59902			MC20.MG28.AS1.I17.R49379	MC20.MG37.AS1.I24.R34963				MC20.MG36.AS1.I1.C5541
						MC20.MG20.AS1.I22.R14686															MC20.MG31.AS1.I1.C625	MC20.MG30.AS1.I1.C874			MC20.MG22.AS1.I22.R8924	MC20.MG23.AS1.I1.C6909	MC20.MG24.AS1.I21.C71	MC20.MG25.AS1.I16.R59906			MC20.MG28.AS1.I17.R49398	MC20.MG37.AS1.I24.R35010				MC20.MG36.AS1.I1.C5542
						MC20.MG20.AS1.I22.R14752															MC20.MG31.AS1.I1.C6257	MC20.MG30.AS1.I1.C875			MC20.MG22.AS1.I22.R8956	MC20.MG23.AS1.I1.C6923	MC20.MG24.AS1.I21.C72	MC20.MG25.AS1.I16.R60058			MC20.MG28.AS1.I17.R49550	MC20.MG37.AS1.I24.R35015				MC20.MG36.AS1.I1.C5543
						MC20.MG20.AS1.I22.R14772															MC20.MG31.AS1.I1.C626	MC20.MG30.AS1.I1.C8851			MC20.MG22.AS1.I22.R8992	MC20.MG23.AS1.I1.C6933	MC20.MG24.AS1.I22.C58	MC20.MG25.AS1.I16.R60183			MC20.MG28.AS1.I17.R49598	MC20.MG37.AS1.I24.R35016				MC20.MG36.AS1.I1.C5552
						MC20.MG20.AS1.I22.R14849															MC20.MG31.AS1.I1.C627	MC20.MG30.AS1.I1.C907			MC20.MG22.AS1.I22.R9134	MC20.MG23.AS1.I1.C6940	MC20.MG24.AS1.I22.C59	MC20.MG25.AS1.I16.R60186			MC20.MG28.AS1.I17.R49643	MC20.MG37.AS1.I24.R35017				MC20.MG36.AS1.I1.C5553
						MC20.MG20.AS1.I22.R14932															MC20.MG31.AS1.I1.C6271	MC20.MG30.AS1.I1.C908			MC20.MG22.AS1.I22.R9189	MC20.MG23.AS1.I1.C699	MC20.MG24.AS1.I22.C9	MC20.MG25.AS1.I16.R60203			MC20.MG28.AS1.I17.R49777	MC20.MG37.AS1.I24.R3512				MC20.MG36.AS1.I1.C5554
						MC20.MG20.AS1.I22.R1494															MC20.MG31.AS1.I1.C628	MC20.MG30.AS1.I1.C909			MC20.MG22.AS1.I22.R9229	MC20.MG23.AS1.I1.C6992	MC20.MG24.AS1.I23.C23	MC20.MG25.AS1.I16.R60638			MC20.MG28.AS1.I17.R49792	MC20.MG37.AS1.I24.R35185				MC20.MG36.AS1.I1.C5561
						MC20.MG20.AS1.I22.R14990															MC20.MG31.AS1.I1.C6298	MC20.MG30.AS1.I1.C910			MC20.MG22.AS1.I22.R9323	MC20.MG23.AS1.I1.C6996	MC20.MG24.AS1.I23.C24	MC20.MG25.AS1.I16.R60710			MC20.MG28.AS1.I17.R49858	MC20.MG37.AS1.I24.R35254				MC20.MG36.AS1.I1.C5695
						MC20.MG20.AS1.I22.R15030															MC20.MG31.AS1.I1.C6305	MC20.MG30.AS1.I1.C911			MC20.MG22.AS1.I22.R9436	MC20.MG23.AS1.I1.C700	MC20.MG24.AS1.I27.R1	MC20.MG25.AS1.I16.R61179			MC20.MG28.AS1.I17.R49896	MC20.MG37.AS1.I24.R35327				MC20.MG36.AS1.I1.C5696
						MC20.MG20.AS1.I22.R15081															MC20.MG31.AS1.I1.C6331	MC20.MG30.AS1.I1.C912			MC20.MG22.AS1.I22.R9540	MC20.MG23.AS1.I1.C7002	MC20.MG24.AS1.I27.R10084	MC20.MG25.AS1.I16.R61185			MC20.MG28.AS1.I17.R49968	MC20.MG37.AS1.I24.R35437				MC20.MG36.AS1.I1.C5697
						MC20.MG20.AS1.I22.R15221															MC20.MG31.AS1.I1.C6361	MC20.MG30.AS1.I1.C9183			MC20.MG22.AS1.I22.R9664	MC20.MG23.AS1.I1.C701	MC20.MG24.AS1.I27.R10168	MC20.MG25.AS1.I16.R61315			MC20.MG28.AS1.I17.R500	MC20.MG37.AS1.I24.R35603				MC20.MG36.AS1.I1.C5711
						MC20.MG20.AS1.I22.R15249															MC20.MG31.AS1.I1.C6423	MC20.MG30.AS1.I1.C9371			MC20.MG22.AS1.I22.R9753	MC20.MG23.AS1.I1.C702	MC20.MG24.AS1.I27.R10329	MC20.MG25.AS1.I16.R61515			MC20.MG28.AS1.I17.R50003	MC20.MG37.AS1.I24.R35618				MC20.MG36.AS1.I1.C5712
						MC20.MG20.AS1.I22.R15438															MC20.MG31.AS1.I1.C6439	MC20.MG30.AS1.I1.C948				MC20.MG23.AS1.I1.C703	MC20.MG24.AS1.I27.R10453	MC20.MG25.AS1.I16.R61534			MC20.MG28.AS1.I17.R50098	MC20.MG37.AS1.I24.R35672				MC20.MG36.AS1.I1.C5713
						MC20.MG20.AS1.I22.R15649															MC20.MG31.AS1.I1.C6468	MC20.MG30.AS1.I1.C949				MC20.MG23.AS1.I1.C704	MC20.MG24.AS1.I27.R10495	MC20.MG25.AS1.I16.R61721			MC20.MG28.AS1.I17.R50178	MC20.MG37.AS1.I24.R35769				MC20.MG36.AS1.I1.C5875
						MC20.MG20.AS1.I22.R15692															MC20.MG31.AS1.I1.C6489	MC20.MG30.AS1.I1.C950				MC20.MG23.AS1.I1.C705	MC20.MG24.AS1.I27.R10502	MC20.MG25.AS1.I16.R61980			MC20.MG28.AS1.I17.R50183	MC20.MG37.AS1.I24.R35847				MC20.MG36.AS1.I1.C5876
						MC20.MG20.AS1.I22.R15751															MC20.MG31.AS1.I1.C6560	MC20.MG30.AS1.I1.C9505				MC20.MG23.AS1.I1.C706	MC20.MG24.AS1.I27.R10586	MC20.MG25.AS1.I16.R62314			MC20.MG28.AS1.I17.R50236	MC20.MG37.AS1.I24.R35909				MC20.MG36.AS1.I1.C595
						MC20.MG20.AS1.I22.R15786															MC20.MG31.AS1.I1.C6564	MC20.MG30.AS1.I1.C951				MC20.MG23.AS1.I1.C7060	MC20.MG24.AS1.I27.R10622	MC20.MG25.AS1.I16.R62353			MC20.MG28.AS1.I17.R50249	MC20.MG37.AS1.I24.R3609				MC20.MG36.AS1.I1.C596
						MC20.MG20.AS1.I22.R15814															MC20.MG31.AS1.I1.C6624	MC20.MG30.AS1.I1.C952				MC20.MG23.AS1.I1.C707	MC20.MG24.AS1.I27.R10856	MC20.MG25.AS1.I16.R62414			MC20.MG28.AS1.I17.R50271	MC20.MG37.AS1.I24.R36170				MC20.MG36.AS1.I1.C597
						MC20.MG20.AS1.I22.R15859															MC20.MG31.AS1.I1.C6634	MC20.MG30.AS1.I1.C9632				MC20.MG23.AS1.I1.C7100	MC20.MG24.AS1.I27.R10924	MC20.MG25.AS1.I16.R62603			MC20.MG28.AS1.I17.R50525	MC20.MG37.AS1.I24.R36228				MC20.MG36.AS1.I1.C598
						MC20.MG20.AS1.I22.R15872															MC20.MG31.AS1.I1.C6699	MC20.MG30.AS1.I1.C9671				MC20.MG23.AS1.I1.C7102	MC20.MG24.AS1.I27.R11004	MC20.MG25.AS1.I16.R62629			MC20.MG28.AS1.I17.R50555	MC20.MG37.AS1.I24.R36334				MC20.MG36.AS1.I1.C599
						MC20.MG20.AS1.I22.R15935															MC20.MG31.AS1.I1.C6726	MC20.MG30.AS1.I1.C9700				MC20.MG23.AS1.I1.C7125	MC20.MG24.AS1.I27.R11154	MC20.MG25.AS1.I16.R62891			MC20.MG28.AS1.I17.R50557	MC20.MG37.AS1.I24.R36351				MC20.MG36.AS1.I1.C600
						MC20.MG20.AS1.I22.R16039															MC20.MG31.AS1.I1.C6753	MC20.MG30.AS1.I1.C986				MC20.MG23.AS1.I1.C7184	MC20.MG24.AS1.I27.R11358	MC20.MG25.AS1.I16.R63025			MC20.MG28.AS1.I17.R50571	MC20.MG37.AS1.I24.R36384				MC20.MG36.AS1.I1.C601
						MC20.MG20.AS1.I22.R16263															MC20.MG31.AS1.I1.C6796	MC20.MG30.AS1.I1.C988				MC20.MG23.AS1.I1.C7193	MC20.MG24.AS1.I27.R11615	MC20.MG25.AS1.I16.R63093			MC20.MG28.AS1.I17.R50586	MC20.MG37.AS1.I24.R36401				MC20.MG36.AS1.I1.C6015
						MC20.MG20.AS1.I22.R16285															MC20.MG31.AS1.I1.C6823	MC20.MG30.AS1.I1.C989				MC20.MG23.AS1.I1.C720	MC20.MG24.AS1.I27.R1163	MC20.MG25.AS1.I16.R63195			MC20.MG28.AS1.I17.R50750	MC20.MG37.AS1.I24.R36438				MC20.MG36.AS1.I1.C6016
						MC20.MG20.AS1.I22.R16327															MC20.MG31.AS1.I1.C6852	MC20.MG30.AS1.I1.C994				MC20.MG23.AS1.I1.C721	MC20.MG24.AS1.I27.R1178	MC20.MG25.AS1.I16.R63311			MC20.MG28.AS1.I17.R50932	MC20.MG37.AS1.I24.R36477				MC20.MG36.AS1.I1.C6017
						MC20.MG20.AS1.I22.R1639															MC20.MG31.AS1.I1.C6877	MC20.MG30.AS1.I1.C995				MC20.MG23.AS1.I1.C722	MC20.MG24.AS1.I27.R11806	MC20.MG25.AS1.I16.R63366			MC20.MG28.AS1.I17.R51047	MC20.MG37.AS1.I24.R36493				MC20.MG36.AS1.I1.C602
						MC20.MG20.AS1.I22.R16604															MC20.MG31.AS1.I1.C6901	MC20.MG30.AS1.I1.C996				MC20.MG23.AS1.I1.C723	MC20.MG24.AS1.I27.R11939	MC20.MG25.AS1.I16.R63474			MC20.MG28.AS1.I17.R5112	MC20.MG37.AS1.I24.R36496				MC20.MG36.AS1.I1.C603
						MC20.MG20.AS1.I22.R16631															MC20.MG31.AS1.I1.C6914	MC20.MG30.AS1.I1.C997				MC20.MG23.AS1.I1.C724	MC20.MG24.AS1.I27.R11959	MC20.MG25.AS1.I16.R63553			MC20.MG28.AS1.I17.R51204	MC20.MG37.AS1.I24.R36520				MC20.MG36.AS1.I1.C6072
						MC20.MG20.AS1.I22.R16685															MC20.MG31.AS1.I1.C6927	MC20.MG30.AS1.I1.C998				MC20.MG23.AS1.I1.C7271	MC20.MG24.AS1.I27.R12048	MC20.MG25.AS1.I16.R63974			MC20.MG28.AS1.I17.R51238	MC20.MG37.AS1.I24.R36701				MC20.MG36.AS1.I1.C6073
						MC20.MG20.AS1.I22.R16816															MC20.MG31.AS1.I1.C6989	MC20.MG30.AS1.I1.C999				MC20.MG23.AS1.I1.C728	MC20.MG24.AS1.I27.R1208	MC20.MG25.AS1.I16.R64170			MC20.MG28.AS1.I17.R51296	MC20.MG37.AS1.I24.R3684				MC20.MG36.AS1.I1.C6141
						MC20.MG20.AS1.I22.R16879															MC20.MG31.AS1.I1.C7023	MC20.MG30.AS1.I2.C104				MC20.MG23.AS1.I1.C729	MC20.MG24.AS1.I27.R12095	MC20.MG25.AS1.I16.R64207			MC20.MG28.AS1.I17.R51316	MC20.MG37.AS1.I24.R36928				MC20.MG36.AS1.I1.C6142
						MC20.MG20.AS1.I22.R16895															MC20.MG31.AS1.I1.C7165	MC20.MG30.AS1.I2.C140				MC20.MG23.AS1.I1.C731	MC20.MG24.AS1.I27.R12117	MC20.MG25.AS1.I16.R64389			MC20.MG28.AS1.I17.R51641	MC20.MG37.AS1.I24.R36940				MC20.MG36.AS1.I1.C6143
						MC20.MG20.AS1.I22.R16912															MC20.MG31.AS1.I1.C7167	MC20.MG30.AS1.I2.C191				MC20.MG23.AS1.I1.C733	MC20.MG24.AS1.I27.R12271	MC20.MG25.AS1.I16.R64523			MC20.MG28.AS1.I17.R51744	MC20.MG37.AS1.I24.R36999				MC20.MG36.AS1.I1.C6157
						MC20.MG20.AS1.I22.R16943															MC20.MG31.AS1.I1.C7202	MC20.MG30.AS1.I2.C218				MC20.MG23.AS1.I1.C734	MC20.MG24.AS1.I27.R12290	MC20.MG25.AS1.I16.R64688			MC20.MG28.AS1.I17.R5184	MC20.MG37.AS1.I24.R3708				MC20.MG36.AS1.I1.C6158
						MC20.MG20.AS1.I22.R1706															MC20.MG31.AS1.I1.C7232	MC20.MG30.AS1.I2.C281				MC20.MG23.AS1.I1.C7405	MC20.MG24.AS1.I27.R12342	MC20.MG25.AS1.I16.R64781			MC20.MG28.AS1.I17.R52058	MC20.MG37.AS1.I24.R37085				MC20.MG36.AS1.I1.C6159
						MC20.MG20.AS1.I22.R17091															MC20.MG31.AS1.I1.C7268	MC20.MG30.AS1.I2.C282				MC20.MG23.AS1.I1.C7429	MC20.MG24.AS1.I27.R1254	MC20.MG25.AS1.I16.R64784			MC20.MG28.AS1.I17.R5206	MC20.MG37.AS1.I24.R37139				MC20.MG36.AS1.I1.C632
						MC20.MG20.AS1.I22.R17160															MC20.MG31.AS1.I1.C7299	MC20.MG30.AS1.I2.C289				MC20.MG23.AS1.I1.C745	MC20.MG24.AS1.I27.R12601	MC20.MG25.AS1.I16.R64785			MC20.MG28.AS1.I17.R52111	MC20.MG37.AS1.I24.R37249				MC20.MG36.AS1.I1.C633
						MC20.MG20.AS1.I22.R17183															MC20.MG31.AS1.I1.C734	MC20.MG30.AS1.I2.C53				MC20.MG23.AS1.I1.C746	MC20.MG24.AS1.I27.R12793	MC20.MG25.AS1.I16.R64841			MC20.MG28.AS1.I17.R52138	MC20.MG37.AS1.I24.R37255				MC20.MG36.AS1.I1.C6333
						MC20.MG20.AS1.I22.R17201															MC20.MG31.AS1.I1.C735	MC20.MG30.AS1.I26.R10055				MC20.MG23.AS1.I1.C7498	MC20.MG24.AS1.I27.R12897	MC20.MG25.AS1.I16.R64977			MC20.MG28.AS1.I17.R52154	MC20.MG37.AS1.I24.R37621				MC20.MG36.AS1.I1.C6334
						MC20.MG20.AS1.I22.R17273															MC20.MG31.AS1.I1.C736	MC20.MG30.AS1.I26.R11201				MC20.MG23.AS1.I1.C7503	MC20.MG24.AS1.I27.R13183	MC20.MG25.AS1.I16.R65094			MC20.MG28.AS1.I17.R52411	MC20.MG37.AS1.I24.R37625				MC20.MG36.AS1.I1.C634
						MC20.MG20.AS1.I22.R17282															MC20.MG31.AS1.I1.C7360	MC20.MG30.AS1.I26.R1129				MC20.MG23.AS1.I1.C7554	MC20.MG24.AS1.I27.R13219	MC20.MG25.AS1.I16.R65165			MC20.MG28.AS1.I17.R52459	MC20.MG37.AS1.I24.R37629				MC20.MG36.AS1.I1.C635
						MC20.MG20.AS1.I22.R17296															MC20.MG31.AS1.I1.C737	MC20.MG30.AS1.I26.R11584				MC20.MG23.AS1.I1.C760	MC20.MG24.AS1.I27.R13280	MC20.MG25.AS1.I16.R65266			MC20.MG28.AS1.I17.R52516	MC20.MG37.AS1.I24.R37730				MC20.MG36.AS1.I1.C636
						MC20.MG20.AS1.I22.R17340															MC20.MG31.AS1.I1.C738	MC20.MG30.AS1.I26.R11865				MC20.MG23.AS1.I1.C7604	MC20.MG24.AS1.I27.R13307	MC20.MG25.AS1.I16.R65357			MC20.MG28.AS1.I17.R52597	MC20.MG37.AS1.I24.R37819				MC20.MG36.AS1.I1.C6364
						MC20.MG20.AS1.I22.R17423															MC20.MG31.AS1.I1.C739	MC20.MG30.AS1.I26.R12350				MC20.MG23.AS1.I1.C761	MC20.MG24.AS1.I27.R13374	MC20.MG25.AS1.I16.R65392			MC20.MG28.AS1.I17.R52990	MC20.MG37.AS1.I24.R37855				MC20.MG36.AS1.I1.C6365
						MC20.MG20.AS1.I22.R17457															MC20.MG31.AS1.I1.C7436	MC20.MG30.AS1.I26.R12577				MC20.MG23.AS1.I1.C762	MC20.MG24.AS1.I27.R13507	MC20.MG25.AS1.I16.R65467			MC20.MG28.AS1.I17.R53000	MC20.MG37.AS1.I24.R37938				MC20.MG36.AS1.I1.C6366
						MC20.MG20.AS1.I22.R1749															MC20.MG31.AS1.I1.C7449	MC20.MG30.AS1.I26.R12585				MC20.MG23.AS1.I1.C7629	MC20.MG24.AS1.I27.R13514	MC20.MG25.AS1.I16.R65543			MC20.MG28.AS1.I17.R53038	MC20.MG37.AS1.I24.R37967				MC20.MG36.AS1.I1.C637
						MC20.MG20.AS1.I22.R1771															MC20.MG31.AS1.I1.C7468	MC20.MG30.AS1.I26.R12669				MC20.MG23.AS1.I1.C763	MC20.MG24.AS1.I27.R13519	MC20.MG25.AS1.I16.R65607			MC20.MG28.AS1.I17.R53058	MC20.MG37.AS1.I24.R37972				MC20.MG36.AS1.I1.C638
						MC20.MG20.AS1.I22.R17718															MC20.MG31.AS1.I1.C7533	MC20.MG30.AS1.I26.R12985				MC20.MG23.AS1.I1.C7649	MC20.MG24.AS1.I27.R13585	MC20.MG25.AS1.I16.R65651			MC20.MG28.AS1.I17.R53152	MC20.MG37.AS1.I24.R37984				MC20.MG36.AS1.I1.C639
						MC20.MG20.AS1.I22.R17744															MC20.MG31.AS1.I1.C7600	MC20.MG30.AS1.I26.R13088				MC20.MG23.AS1.I1.C7650	MC20.MG24.AS1.I27.R136	MC20.MG25.AS1.I16.R65665			MC20.MG28.AS1.I17.R53206	MC20.MG37.AS1.I24.R37988				MC20.MG36.AS1.I1.C6396
						MC20.MG20.AS1.I22.R17774															MC20.MG31.AS1.I1.C7680	MC20.MG30.AS1.I26.R13388				MC20.MG23.AS1.I1.C7651	MC20.MG24.AS1.I27.R13693	MC20.MG25.AS1.I16.R6581			MC20.MG28.AS1.I17.R53298	MC20.MG37.AS1.I24.R37994				MC20.MG36.AS1.I1.C6397
						MC20.MG20.AS1.I22.R17779															MC20.MG31.AS1.I1.C7728	MC20.MG30.AS1.I26.R13455				MC20.MG23.AS1.I1.C7655	MC20.MG24.AS1.I27.R13971	MC20.MG25.AS1.I16.R66127			MC20.MG28.AS1.I17.R53315	MC20.MG37.AS1.I24.R38130				MC20.MG36.AS1.I1.C6398
						MC20.MG20.AS1.I22.R17851															MC20.MG31.AS1.I1.C7789	MC20.MG30.AS1.I26.R1346				MC20.MG23.AS1.I1.C7664	MC20.MG24.AS1.I27.R14079	MC20.MG25.AS1.I16.R66229			MC20.MG28.AS1.I17.R53338	MC20.MG37.AS1.I24.R38209				MC20.MG36.AS1.I1.C640
						MC20.MG20.AS1.I22.R17897															MC20.MG31.AS1.I1.C7900	MC20.MG30.AS1.I26.R13887				MC20.MG23.AS1.I1.C773	MC20.MG24.AS1.I27.R14085	MC20.MG25.AS1.I16.R6632			MC20.MG28.AS1.I17.R53394	MC20.MG37.AS1.I24.R38413				MC20.MG36.AS1.I1.C641
						MC20.MG20.AS1.I22.R1803															MC20.MG31.AS1.I1.C799	MC20.MG30.AS1.I26.R13954				MC20.MG23.AS1.I1.C774	MC20.MG24.AS1.I27.R14098	MC20.MG25.AS1.I16.R66365			MC20.MG28.AS1.I17.R53413	MC20.MG37.AS1.I24.R38464				MC20.MG36.AS1.I1.C642
						MC20.MG20.AS1.I22.R18077															MC20.MG31.AS1.I1.C800	MC20.MG30.AS1.I26.R14087				MC20.MG23.AS1.I1.C775	MC20.MG24.AS1.I27.R1420	MC20.MG25.AS1.I16.R66402			MC20.MG28.AS1.I17.R5345	MC20.MG37.AS1.I24.R38471				MC20.MG36.AS1.I1.C643
						MC20.MG20.AS1.I22.R18268															MC20.MG31.AS1.I1.C8007	MC20.MG30.AS1.I26.R14231				MC20.MG23.AS1.I1.C776	MC20.MG24.AS1.I27.R1423	MC20.MG25.AS1.I16.R6641			MC20.MG28.AS1.I17.R53461	MC20.MG37.AS1.I24.R38626				MC20.MG36.AS1.I1.C644
						MC20.MG20.AS1.I22.R18327															MC20.MG31.AS1.I1.C8008	MC20.MG30.AS1.I26.R14716				MC20.MG23.AS1.I1.C7784	MC20.MG24.AS1.I27.R14254	MC20.MG25.AS1.I16.R66440			MC20.MG28.AS1.I17.R53515	MC20.MG37.AS1.I24.R38696				MC20.MG36.AS1.I1.C645
						MC20.MG20.AS1.I22.R18328															MC20.MG31.AS1.I1.C801	MC20.MG30.AS1.I26.R14920				MC20.MG23.AS1.I1.C779	MC20.MG24.AS1.I27.R14421	MC20.MG25.AS1.I16.R66457			MC20.MG28.AS1.I17.R53704	MC20.MG37.AS1.I24.R38736				MC20.MG36.AS1.I1.C6469
						MC20.MG20.AS1.I22.R18569															MC20.MG31.AS1.I1.C8016	MC20.MG30.AS1.I26.R14972				MC20.MG23.AS1.I1.C780	MC20.MG24.AS1.I27.R14429	MC20.MG25.AS1.I16.R66781			MC20.MG28.AS1.I17.R53850	MC20.MG37.AS1.I24.R38775				MC20.MG36.AS1.I1.C6470
						MC20.MG20.AS1.I22.R18606															MC20.MG31.AS1.I1.C8039	MC20.MG30.AS1.I26.R15050				MC20.MG23.AS1.I1.C781	MC20.MG24.AS1.I27.R14436	MC20.MG25.AS1.I16.R66931			MC20.MG28.AS1.I17.R53876	MC20.MG37.AS1.I24.R38827				MC20.MG36.AS1.I1.C6491
						MC20.MG20.AS1.I22.R18734															MC20.MG31.AS1.I1.C8077	MC20.MG30.AS1.I26.R15220				MC20.MG23.AS1.I1.C7813	MC20.MG24.AS1.I27.R14512	MC20.MG25.AS1.I16.R67010			MC20.MG28.AS1.I17.R5393	MC20.MG37.AS1.I24.R38841				MC20.MG36.AS1.I1.C6492
						MC20.MG20.AS1.I22.R18760															MC20.MG31.AS1.I1.C8090	MC20.MG30.AS1.I26.R15227				MC20.MG23.AS1.I1.C7849	MC20.MG24.AS1.I27.R14543	MC20.MG25.AS1.I16.R67257			MC20.MG28.AS1.I17.R54100	MC20.MG37.AS1.I24.R38965				MC20.MG36.AS1.I1.C6493
						MC20.MG20.AS1.I22.R18795															MC20.MG31.AS1.I1.C8143	MC20.MG30.AS1.I26.R15273				MC20.MG23.AS1.I1.C7881	MC20.MG24.AS1.I27.R14560	MC20.MG25.AS1.I16.R6731			MC20.MG28.AS1.I17.R54355	MC20.MG37.AS1.I24.R39111				MC20.MG36.AS1.I1.C6502
						MC20.MG20.AS1.I22.R18840															MC20.MG31.AS1.I1.C8174	MC20.MG30.AS1.I26.R15365				MC20.MG23.AS1.I1.C7905	MC20.MG24.AS1.I27.R14569	MC20.MG25.AS1.I16.R6765			MC20.MG28.AS1.I17.R5452	MC20.MG37.AS1.I24.R39153				MC20.MG36.AS1.I1.C6503
						MC20.MG20.AS1.I22.R18851															MC20.MG31.AS1.I1.C8176	MC20.MG30.AS1.I26.R1568				MC20.MG23.AS1.I1.C796	MC20.MG24.AS1.I27.R14614	MC20.MG25.AS1.I16.R67737			MC20.MG28.AS1.I17.R54526	MC20.MG37.AS1.I24.R39202				MC20.MG36.AS1.I1.C6504
						MC20.MG20.AS1.I22.R18892															MC20.MG31.AS1.I1.C8272	MC20.MG30.AS1.I26.R15749				MC20.MG23.AS1.I1.C797	MC20.MG24.AS1.I27.R1469	MC20.MG25.AS1.I16.R67981			MC20.MG28.AS1.I17.R54610	MC20.MG37.AS1.I24.R39329				MC20.MG36.AS1.I1.C6523
						MC20.MG20.AS1.I22.R18909															MC20.MG31.AS1.I1.C8293	MC20.MG30.AS1.I26.R15997				MC20.MG23.AS1.I1.C7983	MC20.MG24.AS1.I27.R14742	MC20.MG25.AS1.I16.R6801			MC20.MG28.AS1.I17.R54624	MC20.MG37.AS1.I24.R39392				MC20.MG36.AS1.I1.C6524
						MC20.MG20.AS1.I22.R18913															MC20.MG31.AS1.I1.C8344	MC20.MG30.AS1.I26.R16262				MC20.MG23.AS1.I1.C799	MC20.MG24.AS1.I27.R14776	MC20.MG25.AS1.I16.R68066			MC20.MG28.AS1.I17.R54738	MC20.MG37.AS1.I24.R39444				MC20.MG36.AS1.I1.C6542
						MC20.MG20.AS1.I22.R18924															MC20.MG31.AS1.I1.C8346	MC20.MG30.AS1.I26.R16445				MC20.MG23.AS1.I1.C800	MC20.MG24.AS1.I27.R14782	MC20.MG25.AS1.I16.R68146			MC20.MG28.AS1.I17.R54742	MC20.MG37.AS1.I24.R39565				MC20.MG36.AS1.I1.C6543
						MC20.MG20.AS1.I22.R18963															MC20.MG31.AS1.I1.C8386	MC20.MG30.AS1.I26.R16551				MC20.MG23.AS1.I1.C8000	MC20.MG24.AS1.I27.R14831	MC20.MG25.AS1.I16.R68155			MC20.MG28.AS1.I17.R54893	MC20.MG37.AS1.I24.R39677				MC20.MG36.AS1.I1.C6544
						MC20.MG20.AS1.I22.R1908															MC20.MG31.AS1.I1.C8435	MC20.MG30.AS1.I26.R16659				MC20.MG23.AS1.I1.C801	MC20.MG24.AS1.I27.R14902	MC20.MG25.AS1.I16.R68215			MC20.MG28.AS1.I17.R5496	MC20.MG37.AS1.I24.R39729				MC20.MG36.AS1.I1.C6670
						MC20.MG20.AS1.I22.R19166															MC20.MG31.AS1.I1.C8505	MC20.MG30.AS1.I26.R17029				MC20.MG23.AS1.I1.C802	MC20.MG24.AS1.I27.R14958	MC20.MG25.AS1.I16.R68415			MC20.MG28.AS1.I17.R55088	MC20.MG37.AS1.I24.R39738				MC20.MG36.AS1.I1.C6671
						MC20.MG20.AS1.I22.R1920															MC20.MG31.AS1.I1.C861	MC20.MG30.AS1.I26.R17030				MC20.MG23.AS1.I1.C803	MC20.MG24.AS1.I27.R1509	MC20.MG25.AS1.I16.R68558			MC20.MG28.AS1.I17.R55219	MC20.MG37.AS1.I24.R3974				MC20.MG36.AS1.I1.C6786
						MC20.MG20.AS1.I22.R19501															MC20.MG31.AS1.I1.C862	MC20.MG30.AS1.I26.R17170				MC20.MG23.AS1.I1.C8037	MC20.MG24.AS1.I27.R15119	MC20.MG25.AS1.I16.R68615			MC20.MG28.AS1.I17.R55284	MC20.MG37.AS1.I24.R39747				MC20.MG36.AS1.I1.C6806
						MC20.MG20.AS1.I22.R19554															MC20.MG31.AS1.I1.C863	MC20.MG30.AS1.I26.R17226				MC20.MG23.AS1.I1.C804	MC20.MG24.AS1.I27.R15160	MC20.MG25.AS1.I16.R68648			MC20.MG28.AS1.I17.R55435	MC20.MG37.AS1.I24.R3975				MC20.MG36.AS1.I1.C6807
						MC20.MG20.AS1.I22.R19569															MC20.MG31.AS1.I1.C864	MC20.MG30.AS1.I26.R17562				MC20.MG23.AS1.I1.C811	MC20.MG24.AS1.I27.R15251	MC20.MG25.AS1.I16.R69175			MC20.MG28.AS1.I17.R5563	MC20.MG37.AS1.I24.R39787				MC20.MG36.AS1.I1.C6808
						MC20.MG20.AS1.I22.R19592															MC20.MG31.AS1.I1.C865	MC20.MG30.AS1.I26.R17666				MC20.MG23.AS1.I1.C812	MC20.MG24.AS1.I27.R15286	MC20.MG25.AS1.I16.R69807			MC20.MG28.AS1.I17.R55706	MC20.MG37.AS1.I24.R39827				MC20.MG36.AS1.I1.C6829
						MC20.MG20.AS1.I22.R19600															MC20.MG31.AS1.I1.C866	MC20.MG30.AS1.I26.R18611				MC20.MG23.AS1.I1.C817	MC20.MG24.AS1.I27.R15310	MC20.MG25.AS1.I16.R70037			MC20.MG28.AS1.I17.R55840	MC20.MG37.AS1.I24.R3983				MC20.MG36.AS1.I1.C6896
						MC20.MG20.AS1.I22.R19617															MC20.MG31.AS1.I1.C867	MC20.MG30.AS1.I26.R18890				MC20.MG23.AS1.I1.C8172	MC20.MG24.AS1.I27.R15340	MC20.MG25.AS1.I16.R70047			MC20.MG28.AS1.I17.R55954	MC20.MG37.AS1.I24.R39835				MC20.MG36.AS1.I1.C6935
						MC20.MG20.AS1.I22.R19624															MC20.MG31.AS1.I1.C8697	MC20.MG30.AS1.I26.R19060				MC20.MG23.AS1.I1.C818	MC20.MG24.AS1.I27.R15367	MC20.MG25.AS1.I16.R7022			MC20.MG28.AS1.I17.R56001	MC20.MG37.AS1.I24.R39911				MC20.MG36.AS1.I1.C6973
						MC20.MG20.AS1.I22.R19668															MC20.MG31.AS1.I1.C8799	MC20.MG30.AS1.I26.R19150				MC20.MG23.AS1.I1.C819	MC20.MG24.AS1.I27.R15422	MC20.MG25.AS1.I16.R7024			MC20.MG28.AS1.I17.R56064	MC20.MG37.AS1.I24.R39921				MC20.MG36.AS1.I1.C6990
						MC20.MG20.AS1.I22.R19685															MC20.MG31.AS1.I1.C8800	MC20.MG30.AS1.I26.R19167				MC20.MG23.AS1.I1.C820	MC20.MG24.AS1.I27.R15502	MC20.MG25.AS1.I16.R70331			MC20.MG28.AS1.I17.R56153	MC20.MG37.AS1.I24.R40070				MC20.MG36.AS1.I1.C7013
						MC20.MG20.AS1.I22.R19783															MC20.MG31.AS1.I1.C8891	MC20.MG30.AS1.I26.R19293				MC20.MG23.AS1.I1.C8204	MC20.MG24.AS1.I27.R15541	MC20.MG25.AS1.I16.R70576			MC20.MG28.AS1.I17.R5830	MC20.MG37.AS1.I24.R40194				MC20.MG36.AS1.I1.C7099
						MC20.MG20.AS1.I22.R198															MC20.MG31.AS1.I1.C8936	MC20.MG30.AS1.I26.R20079				MC20.MG23.AS1.I1.C821	MC20.MG24.AS1.I27.R15639	MC20.MG25.AS1.I16.R70607			MC20.MG28.AS1.I17.R5854	MC20.MG37.AS1.I24.R4020				MC20.MG36.AS1.I1.C7149
						MC20.MG20.AS1.I22.R19882															MC20.MG31.AS1.I1.C8956	MC20.MG30.AS1.I26.R20187				MC20.MG23.AS1.I1.C8219	MC20.MG24.AS1.I27.R15685	MC20.MG25.AS1.I16.R70766			MC20.MG28.AS1.I17.R5922	MC20.MG37.AS1.I24.R40279				MC20.MG36.AS1.I1.C7161
						MC20.MG20.AS1.I22.R1993															MC20.MG31.AS1.I1.C8981	MC20.MG30.AS1.I26.R20581				MC20.MG23.AS1.I1.C822	MC20.MG24.AS1.I27.R15804	MC20.MG25.AS1.I16.R70830			MC20.MG28.AS1.I17.R5936	MC20.MG37.AS1.I24.R40321				MC20.MG36.AS1.I1.C718
						MC20.MG20.AS1.I22.R20057															MC20.MG31.AS1.I1.C9012	MC20.MG30.AS1.I26.R20957				MC20.MG23.AS1.I1.C826	MC20.MG24.AS1.I27.R15812	MC20.MG25.AS1.I16.R70862			MC20.MG28.AS1.I17.R6012	MC20.MG37.AS1.I24.R40372				MC20.MG36.AS1.I1.C7183
						MC20.MG20.AS1.I22.R20112															MC20.MG31.AS1.I1.C9022	MC20.MG30.AS1.I26.R21011				MC20.MG23.AS1.I1.C827	MC20.MG24.AS1.I27.R15881	MC20.MG25.AS1.I16.R70961			MC20.MG28.AS1.I17.R6255	MC20.MG37.AS1.I24.R40385				MC20.MG36.AS1.I1.C719
						MC20.MG20.AS1.I22.R20137															MC20.MG31.AS1.I1.C9024	MC20.MG30.AS1.I26.R21024				MC20.MG23.AS1.I1.C828	MC20.MG24.AS1.I27.R15904	MC20.MG25.AS1.I16.R70973			MC20.MG28.AS1.I17.R6315	MC20.MG37.AS1.I24.R40713				MC20.MG36.AS1.I1.C720
						MC20.MG20.AS1.I22.R20179															MC20.MG31.AS1.I1.C9036	MC20.MG30.AS1.I26.R21173				MC20.MG23.AS1.I1.C829	MC20.MG24.AS1.I27.R15925	MC20.MG25.AS1.I16.R71011			MC20.MG28.AS1.I17.R6488	MC20.MG37.AS1.I24.R40730				MC20.MG36.AS1.I1.C721
						MC20.MG20.AS1.I22.R20382															MC20.MG31.AS1.I1.C9067	MC20.MG30.AS1.I26.R21244				MC20.MG23.AS1.I1.C83	MC20.MG24.AS1.I27.R16	MC20.MG25.AS1.I16.R71048			MC20.MG28.AS1.I17.R6609	MC20.MG37.AS1.I24.R40766				MC20.MG36.AS1.I1.C7213
						MC20.MG20.AS1.I22.R20390															MC20.MG31.AS1.I1.C9200	MC20.MG30.AS1.I26.R22131				MC20.MG23.AS1.I1.C830	MC20.MG24.AS1.I27.R16030	MC20.MG25.AS1.I16.R71152			MC20.MG28.AS1.I17.R6623	MC20.MG37.AS1.I24.R40904				MC20.MG36.AS1.I1.C722
						MC20.MG20.AS1.I22.R2050															MC20.MG31.AS1.I1.C9293	MC20.MG30.AS1.I26.R22181				MC20.MG23.AS1.I1.C8307	MC20.MG24.AS1.I27.R16084	MC20.MG25.AS1.I16.R71207			MC20.MG28.AS1.I17.R6682	MC20.MG37.AS1.I24.R40986				MC20.MG36.AS1.I1.C7229
						MC20.MG20.AS1.I22.R20516															MC20.MG31.AS1.I1.C9302	MC20.MG30.AS1.I26.R22329				MC20.MG23.AS1.I1.C831	MC20.MG24.AS1.I27.R16089	MC20.MG25.AS1.I16.R71213			MC20.MG28.AS1.I17.R6742	MC20.MG37.AS1.I24.R41064				MC20.MG36.AS1.I1.C723
						MC20.MG20.AS1.I22.R20525															MC20.MG31.AS1.I1.C9341	MC20.MG30.AS1.I26.R22376				MC20.MG23.AS1.I1.C8316	MC20.MG24.AS1.I27.R16164	MC20.MG25.AS1.I16.R71464			MC20.MG28.AS1.I17.R6878	MC20.MG37.AS1.I24.R412				MC20.MG36.AS1.I1.C7236
						MC20.MG20.AS1.I22.R2066															MC20.MG31.AS1.I1.C9410	MC20.MG30.AS1.I26.R22838				MC20.MG23.AS1.I1.C8317	MC20.MG24.AS1.I27.R16219	MC20.MG25.AS1.I16.R71505			MC20.MG28.AS1.I17.R7049	MC20.MG37.AS1.I24.R41493				MC20.MG36.AS1.I1.C724
						MC20.MG20.AS1.I22.R20715															MC20.MG31.AS1.I1.C9495	MC20.MG30.AS1.I26.R23623				MC20.MG23.AS1.I1.C8339	MC20.MG24.AS1.I27.R16248	MC20.MG25.AS1.I16.R71672			MC20.MG28.AS1.I17.R7216	MC20.MG37.AS1.I24.R41507				MC20.MG36.AS1.I1.C725
						MC20.MG20.AS1.I22.R20726															MC20.MG31.AS1.I1.C9550	MC20.MG30.AS1.I26.R2377				MC20.MG23.AS1.I1.C8352	MC20.MG24.AS1.I27.R1634	MC20.MG25.AS1.I16.R71715			MC20.MG28.AS1.I17.R7284	MC20.MG37.AS1.I24.R41550				MC20.MG36.AS1.I1.C726
						MC20.MG20.AS1.I22.R20746															MC20.MG31.AS1.I1.C956	MC20.MG30.AS1.I26.R24269				MC20.MG23.AS1.I1.C8394	MC20.MG24.AS1.I27.R16341	MC20.MG25.AS1.I16.R71871			MC20.MG28.AS1.I17.R7285	MC20.MG37.AS1.I24.R41622				MC20.MG36.AS1.I1.C727
						MC20.MG20.AS1.I22.R20782															MC20.MG31.AS1.I1.C9564	MC20.MG30.AS1.I26.R24496				MC20.MG23.AS1.I1.C84	MC20.MG24.AS1.I27.R1635	MC20.MG25.AS1.I16.R72057			MC20.MG28.AS1.I17.R7439	MC20.MG37.AS1.I24.R41718				MC20.MG36.AS1.I1.C728
						MC20.MG20.AS1.I22.R20816															MC20.MG31.AS1.I1.C957	MC20.MG30.AS1.I26.R24634				MC20.MG23.AS1.I1.C843	MC20.MG24.AS1.I27.R16517	MC20.MG25.AS1.I16.R72198			MC20.MG28.AS1.I17.R7443	MC20.MG37.AS1.I24.R42062				MC20.MG36.AS1.I1.C729
						MC20.MG20.AS1.I22.R2093															MC20.MG31.AS1.I1.C958	MC20.MG30.AS1.I26.R24878				MC20.MG23.AS1.I1.C8430	MC20.MG24.AS1.I27.R166	MC20.MG25.AS1.I16.R72393			MC20.MG28.AS1.I17.R757	MC20.MG37.AS1.I24.R42093				MC20.MG36.AS1.I1.C7297
						MC20.MG20.AS1.I22.R20945															MC20.MG31.AS1.I1.C959	MC20.MG30.AS1.I26.R24935				MC20.MG23.AS1.I1.C844	MC20.MG24.AS1.I27.R16687	MC20.MG25.AS1.I16.R72494			MC20.MG28.AS1.I17.R7576	MC20.MG37.AS1.I24.R42153				MC20.MG36.AS1.I1.C730
						MC20.MG20.AS1.I22.R21038															MC20.MG31.AS1.I1.C960	MC20.MG30.AS1.I26.R25191				MC20.MG23.AS1.I1.C845	MC20.MG24.AS1.I27.R16710	MC20.MG25.AS1.I16.R72506			MC20.MG28.AS1.I17.R7735	MC20.MG37.AS1.I24.R42210				MC20.MG36.AS1.I1.C731
						MC20.MG20.AS1.I22.R21086															MC20.MG31.AS1.I1.C961	MC20.MG30.AS1.I26.R25486				MC20.MG23.AS1.I1.C846	MC20.MG24.AS1.I27.R16733	MC20.MG25.AS1.I16.R72510			MC20.MG28.AS1.I17.R7764	MC20.MG37.AS1.I24.R42236				MC20.MG36.AS1.I1.C7323
						MC20.MG20.AS1.I22.R21126															MC20.MG31.AS1.I1.C962	MC20.MG30.AS1.I26.R25600				MC20.MG23.AS1.I1.C847	MC20.MG24.AS1.I27.R16755	MC20.MG25.AS1.I16.R72550			MC20.MG28.AS1.I17.R7790	MC20.MG37.AS1.I24.R42391				MC20.MG36.AS1.I1.C7332
						MC20.MG20.AS1.I22.R21167															MC20.MG31.AS1.I1.C9690	MC20.MG30.AS1.I26.R25673				MC20.MG23.AS1.I1.C848	MC20.MG24.AS1.I27.R16816	MC20.MG25.AS1.I16.R72726			MC20.MG28.AS1.I17.R7835	MC20.MG37.AS1.I24.R42424				MC20.MG36.AS1.I1.C7400
						MC20.MG20.AS1.I22.R21173															MC20.MG31.AS1.I1.C9761	MC20.MG30.AS1.I26.R25958				MC20.MG23.AS1.I1.C85	MC20.MG24.AS1.I27.R1690	MC20.MG25.AS1.I16.R7277			MC20.MG28.AS1.I17.R7897	MC20.MG37.AS1.I24.R42450				MC20.MG36.AS1.I1.C7417
						MC20.MG20.AS1.I22.R21174															MC20.MG31.AS1.I1.C980	MC20.MG30.AS1.I26.R26228				MC20.MG23.AS1.I1.C8559	MC20.MG24.AS1.I27.R16961	MC20.MG25.AS1.I16.R7510			MC20.MG28.AS1.I17.R7989	MC20.MG37.AS1.I24.R42595				MC20.MG36.AS1.I1.C7441
						MC20.MG20.AS1.I22.R21240															MC20.MG31.AS1.I1.C9808	MC20.MG30.AS1.I26.R26402				MC20.MG23.AS1.I1.C8577	MC20.MG24.AS1.I27.R17058	MC20.MG25.AS1.I16.R7536			MC20.MG28.AS1.I17.R8027	MC20.MG37.AS1.I24.R42733				MC20.MG36.AS1.I1.C7444
						MC20.MG20.AS1.I22.R21310															MC20.MG31.AS1.I1.C981	MC20.MG30.AS1.I26.R26590				MC20.MG23.AS1.I1.C86	MC20.MG24.AS1.I27.R17070	MC20.MG25.AS1.I16.R76			MC20.MG28.AS1.I17.R8176	MC20.MG37.AS1.I24.R42809				MC20.MG36.AS1.I1.C7447
						MC20.MG20.AS1.I22.R21428															MC20.MG31.AS1.I1.C982	MC20.MG30.AS1.I26.R26649				MC20.MG23.AS1.I1.C8606	MC20.MG24.AS1.I27.R17155	MC20.MG25.AS1.I16.R7620			MC20.MG28.AS1.I17.R830	MC20.MG37.AS1.I24.R42825				MC20.MG36.AS1.I1.C7486
						MC20.MG20.AS1.I22.R21468															MC20.MG31.AS1.I1.C9880	MC20.MG30.AS1.I26.R26761				MC20.MG23.AS1.I1.C861	MC20.MG24.AS1.I27.R17194	MC20.MG25.AS1.I16.R7681			MC20.MG28.AS1.I17.R8365	MC20.MG37.AS1.I24.R42981				MC20.MG36.AS1.I1.C7507
						MC20.MG20.AS1.I22.R21500															MC20.MG31.AS1.I1.C9889	MC20.MG30.AS1.I26.R26876				MC20.MG23.AS1.I1.C8613	MC20.MG24.AS1.I27.R17264	MC20.MG25.AS1.I16.R7753			MC20.MG28.AS1.I17.R8378	MC20.MG37.AS1.I24.R42995				MC20.MG36.AS1.I1.C7538
						MC20.MG20.AS1.I22.R21715															MC20.MG31.AS1.I1.C9935	MC20.MG30.AS1.I26.R26899				MC20.MG23.AS1.I1.C862	MC20.MG24.AS1.I27.R17318	MC20.MG25.AS1.I16.R8317			MC20.MG28.AS1.I17.R8560	MC20.MG37.AS1.I24.R43041				MC20.MG36.AS1.I1.C7574
						MC20.MG20.AS1.I22.R21722															MC20.MG31.AS1.I1.C9996	MC20.MG30.AS1.I26.R26902				MC20.MG23.AS1.I1.C863	MC20.MG24.AS1.I27.R17343	MC20.MG25.AS1.I16.R8569			MC20.MG28.AS1.I17.R866	MC20.MG37.AS1.I24.R43083				MC20.MG36.AS1.I1.C7610
						MC20.MG20.AS1.I22.R21755															MC20.MG31.AS1.I2.C278	MC20.MG30.AS1.I26.R2709				MC20.MG23.AS1.I1.C864	MC20.MG24.AS1.I27.R17553	MC20.MG25.AS1.I16.R8695			MC20.MG28.AS1.I17.R8708	MC20.MG37.AS1.I24.R43095				MC20.MG36.AS1.I1.C7712
						MC20.MG20.AS1.I22.R2182															MC20.MG31.AS1.I2.C323	MC20.MG30.AS1.I26.R2723				MC20.MG23.AS1.I1.C865	MC20.MG24.AS1.I27.R17560	MC20.MG25.AS1.I16.R877			MC20.MG28.AS1.I17.R871	MC20.MG37.AS1.I24.R43167				MC20.MG36.AS1.I1.C772
						MC20.MG20.AS1.I22.R21926															MC20.MG31.AS1.I2.C345	MC20.MG30.AS1.I26.R27233				MC20.MG23.AS1.I1.C87	MC20.MG24.AS1.I27.R17562	MC20.MG25.AS1.I16.R8942			MC20.MG28.AS1.I17.R8796	MC20.MG37.AS1.I24.R43214				MC20.MG36.AS1.I1.C773
						MC20.MG20.AS1.I22.R2195															MC20.MG31.AS1.I2.C370	MC20.MG30.AS1.I26.R27356				MC20.MG23.AS1.I1.C870	MC20.MG24.AS1.I27.R17567	MC20.MG25.AS1.I16.R8982			MC20.MG28.AS1.I17.R90	MC20.MG37.AS1.I24.R43240				MC20.MG36.AS1.I1.C774
						MC20.MG20.AS1.I22.R22219															MC20.MG31.AS1.I2.C488	MC20.MG30.AS1.I26.R27550				MC20.MG23.AS1.I1.C871	MC20.MG24.AS1.I27.R1757	MC20.MG25.AS1.I16.R9046			MC20.MG28.AS1.I17.R9057	MC20.MG37.AS1.I24.R43251				MC20.MG36.AS1.I1.C775
						MC20.MG20.AS1.I22.R22258															MC20.MG31.AS1.I2.C680	MC20.MG30.AS1.I26.R27673				MC20.MG23.AS1.I1.C872	MC20.MG24.AS1.I27.R17619	MC20.MG25.AS1.I16.R9093			MC20.MG28.AS1.I17.R9234	MC20.MG37.AS1.I24.R43256				MC20.MG36.AS1.I1.C776
						MC20.MG20.AS1.I22.R22260															MC20.MG31.AS1.I2.C857	MC20.MG30.AS1.I26.R27681				MC20.MG23.AS1.I1.C8720	MC20.MG24.AS1.I27.R17635	MC20.MG25.AS1.I16.R9323			MC20.MG28.AS1.I17.R932	MC20.MG37.AS1.I24.R43312				MC20.MG36.AS1.I1.C7768
						MC20.MG20.AS1.I22.R22281															MC20.MG31.AS1.I30.C1033	MC20.MG30.AS1.I26.R28063				MC20.MG23.AS1.I1.C873	MC20.MG24.AS1.I27.R17672	MC20.MG25.AS1.I16.R9738			MC20.MG28.AS1.I17.R9541	MC20.MG37.AS1.I24.R43485				MC20.MG36.AS1.I1.C777
						MC20.MG20.AS1.I22.R22487															MC20.MG31.AS1.I30.C1034	MC20.MG30.AS1.I26.R28373				MC20.MG23.AS1.I1.C874	MC20.MG24.AS1.I27.R17835	MC20.MG25.AS1.I16.R9814			MC20.MG28.AS1.I17.R9556	MC20.MG37.AS1.I24.R43501				MC20.MG36.AS1.I1.C778
						MC20.MG20.AS1.I22.R22504															MC20.MG31.AS1.I30.C1065	MC20.MG30.AS1.I26.R28661				MC20.MG23.AS1.I1.C8748	MC20.MG24.AS1.I27.R17859	MC20.MG25.AS1.I16.R9829			MC20.MG28.AS1.I17.R9562	MC20.MG37.AS1.I24.R43559				MC20.MG36.AS1.I1.C7831
						MC20.MG20.AS1.I22.R22576															MC20.MG31.AS1.I30.C1066	MC20.MG30.AS1.I26.R28907				MC20.MG23.AS1.I1.C8777	MC20.MG24.AS1.I27.R17914	MC20.MG25.AS1.I16.R9997			MC20.MG28.AS1.I17.R9713	MC20.MG37.AS1.I24.R43597				MC20.MG36.AS1.I1.C7946
						MC20.MG20.AS1.I22.R22696															MC20.MG31.AS1.I30.C1121	MC20.MG30.AS1.I26.R28994				MC20.MG23.AS1.I1.C8785	MC20.MG24.AS1.I27.R18160				MC20.MG28.AS1.I17.R9878	MC20.MG37.AS1.I24.R43605				MC20.MG36.AS1.I1.C7964
						MC20.MG20.AS1.I22.R22719															MC20.MG31.AS1.I30.C1122	MC20.MG30.AS1.I26.R28999				MC20.MG23.AS1.I1.C88	MC20.MG24.AS1.I27.R18226				MC20.MG28.AS1.I17.R9922	MC20.MG37.AS1.I24.R43611				MC20.MG36.AS1.I1.C8092
						MC20.MG20.AS1.I22.R22765															MC20.MG31.AS1.I30.C121	MC20.MG30.AS1.I26.R29019				MC20.MG23.AS1.I1.C8825	MC20.MG24.AS1.I27.R18284				MC20.MG28.AS1.I9.C1	MC20.MG37.AS1.I24.R43669				MC20.MG36.AS1.I1.C8156
						MC20.MG20.AS1.I22.R22775															MC20.MG31.AS1.I30.C122	MC20.MG30.AS1.I26.R29438				MC20.MG23.AS1.I1.C884	MC20.MG24.AS1.I27.R18335					MC20.MG37.AS1.I24.R43689				MC20.MG36.AS1.I1.C8235
						MC20.MG20.AS1.I22.R22875															MC20.MG31.AS1.I30.C489	MC20.MG30.AS1.I26.R29496				MC20.MG23.AS1.I1.C885	MC20.MG24.AS1.I27.R18371					MC20.MG37.AS1.I24.R43744				MC20.MG36.AS1.I1.C8274
						MC20.MG20.AS1.I22.R22939															MC20.MG31.AS1.I30.C490	MC20.MG30.AS1.I26.R29535				MC20.MG23.AS1.I1.C886	MC20.MG24.AS1.I27.R18435					MC20.MG37.AS1.I24.R43761				MC20.MG36.AS1.I1.C8318
						MC20.MG20.AS1.I22.R22981															MC20.MG31.AS1.I30.C59	MC20.MG30.AS1.I26.R29901				MC20.MG23.AS1.I1.C887	MC20.MG24.AS1.I27.R18441					MC20.MG37.AS1.I24.R43796				MC20.MG36.AS1.I1.C8411
						MC20.MG20.AS1.I22.R23325															MC20.MG31.AS1.I30.C60	MC20.MG30.AS1.I26.R29996				MC20.MG23.AS1.I1.C8902	MC20.MG24.AS1.I27.R18509					MC20.MG37.AS1.I24.R43824				MC20.MG36.AS1.I1.C8421
						MC20.MG20.AS1.I22.R2334															MC20.MG31.AS1.I30.C660	MC20.MG30.AS1.I26.R30049				MC20.MG23.AS1.I1.C8928	MC20.MG24.AS1.I27.R18526					MC20.MG37.AS1.I24.R43861				MC20.MG36.AS1.I1.C8428
						MC20.MG20.AS1.I22.R23455															MC20.MG31.AS1.I30.C663	MC20.MG30.AS1.I26.R30091				MC20.MG23.AS1.I1.C895	MC20.MG24.AS1.I27.R18614					MC20.MG37.AS1.I24.R43957				MC20.MG36.AS1.I1.C844
						MC20.MG20.AS1.I22.R23471															MC20.MG31.AS1.I30.C664	MC20.MG30.AS1.I26.R30293				MC20.MG23.AS1.I1.C896	MC20.MG24.AS1.I27.R18703					MC20.MG37.AS1.I24.R43965				MC20.MG36.AS1.I1.C845
						MC20.MG20.AS1.I22.R23554															MC20.MG31.AS1.I30.C975	MC20.MG30.AS1.I26.R30496				MC20.MG23.AS1.I1.C8967	MC20.MG24.AS1.I27.R18797					MC20.MG37.AS1.I24.R43975				MC20.MG36.AS1.I1.C846
						MC20.MG20.AS1.I22.R23566															MC20.MG31.AS1.I30.C976	MC20.MG30.AS1.I26.R30517				MC20.MG23.AS1.I1.C897	MC20.MG24.AS1.I27.R18831					MC20.MG37.AS1.I24.R44126				MC20.MG36.AS1.I1.C8467
						MC20.MG20.AS1.I22.R23669															MC20.MG31.AS1.I33.R10127	MC20.MG30.AS1.I26.R31411				MC20.MG23.AS1.I1.C8986	MC20.MG24.AS1.I27.R18940					MC20.MG37.AS1.I24.R44146				MC20.MG36.AS1.I1.C847
						MC20.MG20.AS1.I22.R23712															MC20.MG31.AS1.I33.R10171	MC20.MG30.AS1.I26.R31786				MC20.MG23.AS1.I1.C8991	MC20.MG24.AS1.I27.R18981					MC20.MG37.AS1.I24.R44199				MC20.MG36.AS1.I1.C848
						MC20.MG20.AS1.I22.R24043															MC20.MG31.AS1.I33.R1033	MC20.MG30.AS1.I26.R31868				MC20.MG23.AS1.I1.C8994	MC20.MG24.AS1.I27.R19138					MC20.MG37.AS1.I24.R44205				MC20.MG36.AS1.I1.C8487
						MC20.MG20.AS1.I22.R24050															MC20.MG31.AS1.I33.R10505	MC20.MG30.AS1.I26.R32174				MC20.MG23.AS1.I1.C8995	MC20.MG24.AS1.I27.R19171					MC20.MG37.AS1.I24.R44310				MC20.MG36.AS1.I1.C8502
						MC20.MG20.AS1.I22.R24081															MC20.MG31.AS1.I33.R10891	MC20.MG30.AS1.I26.R32681				MC20.MG23.AS1.I1.C90	MC20.MG24.AS1.I27.R19189					MC20.MG37.AS1.I24.R44335				MC20.MG36.AS1.I1.C851
						MC20.MG20.AS1.I22.R2442															MC20.MG31.AS1.I33.R10995	MC20.MG30.AS1.I26.R32848				MC20.MG23.AS1.I1.C9038	MC20.MG24.AS1.I27.R19214					MC20.MG37.AS1.I24.R44436				MC20.MG36.AS1.I1.C852
						MC20.MG20.AS1.I22.R24425															MC20.MG31.AS1.I33.R11024	MC20.MG30.AS1.I26.R32902				MC20.MG23.AS1.I1.C9063	MC20.MG24.AS1.I27.R19216					MC20.MG37.AS1.I24.R44475				MC20.MG36.AS1.I1.C856
						MC20.MG20.AS1.I22.R24513															MC20.MG31.AS1.I33.R11050	MC20.MG30.AS1.I26.R32999				MC20.MG23.AS1.I1.C9083	MC20.MG24.AS1.I27.R19237					MC20.MG37.AS1.I24.R44549				MC20.MG36.AS1.I1.C857
						MC20.MG20.AS1.I22.R24566															MC20.MG31.AS1.I33.R11059	MC20.MG30.AS1.I26.R33500				MC20.MG23.AS1.I1.C9102	MC20.MG24.AS1.I27.R1929					MC20.MG37.AS1.I24.R44602				MC20.MG36.AS1.I1.C858
						MC20.MG20.AS1.I22.R2462															MC20.MG31.AS1.I33.R11234	MC20.MG30.AS1.I26.R3366				MC20.MG23.AS1.I1.C911	MC20.MG24.AS1.I27.R193					MC20.MG37.AS1.I24.R44764				MC20.MG36.AS1.I1.C859
						MC20.MG20.AS1.I22.R24691															MC20.MG31.AS1.I33.R11338	MC20.MG30.AS1.I26.R34219				MC20.MG23.AS1.I1.C912	MC20.MG24.AS1.I27.R1936					MC20.MG37.AS1.I24.R44773				MC20.MG36.AS1.I1.C860
						MC20.MG20.AS1.I22.R24806															MC20.MG31.AS1.I33.R11394	MC20.MG30.AS1.I26.R34367				MC20.MG23.AS1.I1.C9123	MC20.MG24.AS1.I27.R19384					MC20.MG37.AS1.I24.R44804				MC20.MG36.AS1.I1.C861
						MC20.MG20.AS1.I22.R24832															MC20.MG31.AS1.I33.R11595	MC20.MG30.AS1.I26.R35153				MC20.MG23.AS1.I1.C913	MC20.MG24.AS1.I27.R19427					MC20.MG37.AS1.I24.R44870				MC20.MG36.AS1.I1.C862
						MC20.MG20.AS1.I22.R2491															MC20.MG31.AS1.I33.R1164	MC20.MG30.AS1.I26.R35420				MC20.MG23.AS1.I1.C9136	MC20.MG24.AS1.I27.R19476					MC20.MG37.AS1.I24.R44904				MC20.MG36.AS1.I1.C863
						MC20.MG20.AS1.I22.R25097															MC20.MG31.AS1.I33.R11666	MC20.MG30.AS1.I26.R35427				MC20.MG23.AS1.I1.C914	MC20.MG24.AS1.I27.R19520					MC20.MG37.AS1.I24.R45006				MC20.MG36.AS1.I1.C8668
						MC20.MG20.AS1.I22.R25151															MC20.MG31.AS1.I33.R12003	MC20.MG30.AS1.I26.R35587				MC20.MG23.AS1.I1.C9155	MC20.MG24.AS1.I27.R19575					MC20.MG37.AS1.I24.R45148				MC20.MG36.AS1.I1.C872
						MC20.MG20.AS1.I22.R25198															MC20.MG31.AS1.I33.R12093	MC20.MG30.AS1.I26.R35868				MC20.MG23.AS1.I1.C924	MC20.MG24.AS1.I27.R19669					MC20.MG37.AS1.I24.R4522				MC20.MG36.AS1.I1.C873
						MC20.MG20.AS1.I22.R25381															MC20.MG31.AS1.I33.R12480	MC20.MG30.AS1.I26.R36357				MC20.MG23.AS1.I1.C925	MC20.MG24.AS1.I27.R19859					MC20.MG37.AS1.I24.R45274				MC20.MG36.AS1.I1.C874
						MC20.MG20.AS1.I22.R25519															MC20.MG31.AS1.I33.R1261	MC20.MG30.AS1.I26.R36360				MC20.MG23.AS1.I1.C926	MC20.MG24.AS1.I27.R19871					MC20.MG37.AS1.I24.R45323				MC20.MG36.AS1.I1.C875
						MC20.MG20.AS1.I22.R25554															MC20.MG31.AS1.I33.R12702	MC20.MG30.AS1.I26.R36465				MC20.MG23.AS1.I1.C9262	MC20.MG24.AS1.I27.R1991					MC20.MG37.AS1.I24.R45415				MC20.MG36.AS1.I1.C876
						MC20.MG20.AS1.I22.R25579															MC20.MG31.AS1.I33.R12755	MC20.MG30.AS1.I26.R36532				MC20.MG23.AS1.I1.C9263	MC20.MG24.AS1.I27.R19913					MC20.MG37.AS1.I24.R4542				MC20.MG36.AS1.I1.C877
						MC20.MG20.AS1.I22.R25628															MC20.MG31.AS1.I33.R13290	MC20.MG30.AS1.I26.R36630				MC20.MG23.AS1.I1.C9264	MC20.MG24.AS1.I27.R20013					MC20.MG37.AS1.I24.R45441				MC20.MG36.AS1.I1.C8776
						MC20.MG20.AS1.I22.R25685															MC20.MG31.AS1.I33.R13409	MC20.MG30.AS1.I26.R36867				MC20.MG23.AS1.I1.C9267	MC20.MG24.AS1.I27.R20018					MC20.MG37.AS1.I24.R45574				MC20.MG36.AS1.I1.C878
						MC20.MG20.AS1.I22.R25690															MC20.MG31.AS1.I33.R13425	MC20.MG30.AS1.I26.R36935				MC20.MG23.AS1.I1.C927	MC20.MG24.AS1.I27.R20064					MC20.MG37.AS1.I24.R45588				MC20.MG36.AS1.I1.C879
						MC20.MG20.AS1.I22.R25697															MC20.MG31.AS1.I33.R13443	MC20.MG30.AS1.I26.R36947				MC20.MG23.AS1.I1.C9279	MC20.MG24.AS1.I27.R20071					MC20.MG37.AS1.I24.R45591				MC20.MG36.AS1.I1.C881
						MC20.MG20.AS1.I22.R25775															MC20.MG31.AS1.I33.R13467	MC20.MG30.AS1.I26.R36965				MC20.MG23.AS1.I1.C9285	MC20.MG24.AS1.I27.R20092					MC20.MG37.AS1.I24.R45595				MC20.MG36.AS1.I1.C8812
						MC20.MG20.AS1.I22.R25907															MC20.MG31.AS1.I33.R13745	MC20.MG30.AS1.I26.R37279				MC20.MG23.AS1.I1.C93	MC20.MG24.AS1.I27.R2013					MC20.MG37.AS1.I24.R45615				MC20.MG36.AS1.I1.C882
						MC20.MG20.AS1.I22.R25914															MC20.MG31.AS1.I33.R14019	MC20.MG30.AS1.I26.R37491				MC20.MG23.AS1.I1.C9323	MC20.MG24.AS1.I27.R20148					MC20.MG37.AS1.I24.R45704				MC20.MG36.AS1.I1.C883
						MC20.MG20.AS1.I22.R26044															MC20.MG31.AS1.I33.R14099	MC20.MG30.AS1.I26.R38040				MC20.MG23.AS1.I1.C9335	MC20.MG24.AS1.I27.R20176					MC20.MG37.AS1.I24.R45741				MC20.MG36.AS1.I1.C884
						MC20.MG20.AS1.I22.R26246															MC20.MG31.AS1.I33.R141	MC20.MG30.AS1.I26.R38742				MC20.MG23.AS1.I1.C9416	MC20.MG24.AS1.I27.R20251					MC20.MG37.AS1.I24.R45763				MC20.MG36.AS1.I1.C885
						MC20.MG20.AS1.I22.R26262															MC20.MG31.AS1.I33.R14109	MC20.MG30.AS1.I26.R38787				MC20.MG23.AS1.I1.C9538	MC20.MG24.AS1.I27.R20255					MC20.MG37.AS1.I24.R4579				MC20.MG36.AS1.I1.C886
						MC20.MG20.AS1.I22.R26265															MC20.MG31.AS1.I33.R14455	MC20.MG30.AS1.I26.R39042				MC20.MG23.AS1.I1.C954	MC20.MG24.AS1.I27.R20355					MC20.MG37.AS1.I24.R45818				MC20.MG36.AS1.I1.C887
						MC20.MG20.AS1.I22.R26299															MC20.MG31.AS1.I33.R14612	MC20.MG30.AS1.I26.R39098				MC20.MG23.AS1.I1.C955	MC20.MG24.AS1.I27.R20506					MC20.MG37.AS1.I24.R45824				MC20.MG36.AS1.I1.C888
						MC20.MG20.AS1.I22.R26348															MC20.MG31.AS1.I33.R14626	MC20.MG30.AS1.I26.R39195				MC20.MG23.AS1.I1.C956	MC20.MG24.AS1.I27.R20507					MC20.MG37.AS1.I24.R45836				MC20.MG36.AS1.I1.C889
						MC20.MG20.AS1.I22.R26373															MC20.MG31.AS1.I33.R15002	MC20.MG30.AS1.I26.R39218				MC20.MG23.AS1.I1.C957	MC20.MG24.AS1.I27.R2054					MC20.MG37.AS1.I24.R46136				MC20.MG36.AS1.I1.C890
						MC20.MG20.AS1.I22.R26385															MC20.MG31.AS1.I33.R15022	MC20.MG30.AS1.I26.R39749				MC20.MG23.AS1.I1.C9637	MC20.MG24.AS1.I27.R20591					MC20.MG37.AS1.I24.R46152				MC20.MG36.AS1.I1.C8912
						MC20.MG20.AS1.I22.R26581															MC20.MG31.AS1.I33.R15176	MC20.MG30.AS1.I26.R39856				MC20.MG23.AS1.I1.C9683	MC20.MG24.AS1.I27.R20616					MC20.MG37.AS1.I24.R46182				MC20.MG36.AS1.I1.C897
						MC20.MG20.AS1.I22.R26598															MC20.MG31.AS1.I33.R15287	MC20.MG30.AS1.I26.R39860				MC20.MG23.AS1.I1.C969	MC20.MG24.AS1.I27.R20686					MC20.MG37.AS1.I24.R46318				MC20.MG36.AS1.I1.C898
						MC20.MG20.AS1.I22.R26775															MC20.MG31.AS1.I33.R15520	MC20.MG30.AS1.I26.R39868				MC20.MG23.AS1.I1.C970	MC20.MG24.AS1.I27.R20720					MC20.MG37.AS1.I24.R46458				MC20.MG36.AS1.I1.C899
						MC20.MG20.AS1.I22.R26793															MC20.MG31.AS1.I33.R15604	MC20.MG30.AS1.I26.R39988				MC20.MG23.AS1.I1.C971	MC20.MG24.AS1.I27.R21003					MC20.MG37.AS1.I24.R46460				MC20.MG36.AS1.I1.C900
						MC20.MG20.AS1.I22.R26857															MC20.MG31.AS1.I33.R1567	MC20.MG30.AS1.I26.R40522				MC20.MG23.AS1.I1.C9712	MC20.MG24.AS1.I27.R21013					MC20.MG37.AS1.I24.R46563				MC20.MG36.AS1.I1.C901
						MC20.MG20.AS1.I22.R26891															MC20.MG31.AS1.I33.R15776	MC20.MG30.AS1.I26.R40553				MC20.MG23.AS1.I1.C9742	MC20.MG24.AS1.I27.R21037					MC20.MG37.AS1.I24.R4657				MC20.MG36.AS1.I1.C902
						MC20.MG20.AS1.I22.R26921															MC20.MG31.AS1.I33.R15777	MC20.MG30.AS1.I26.R40894				MC20.MG23.AS1.I1.C9763	MC20.MG24.AS1.I27.R21110					MC20.MG37.AS1.I24.R46686				MC20.MG36.AS1.I1.C903
						MC20.MG20.AS1.I22.R26930															MC20.MG31.AS1.I33.R15811	MC20.MG30.AS1.I26.R41070				MC20.MG23.AS1.I1.C9794	MC20.MG24.AS1.I27.R21300					MC20.MG37.AS1.I24.R46751				MC20.MG36.AS1.I1.C9033
						MC20.MG20.AS1.I22.R26939															MC20.MG31.AS1.I33.R15877	MC20.MG30.AS1.I26.R41116				MC20.MG23.AS1.I1.C980	MC20.MG24.AS1.I27.R21332					MC20.MG37.AS1.I24.R46764				MC20.MG36.AS1.I1.C904
						MC20.MG20.AS1.I22.R26961															MC20.MG31.AS1.I33.R15935	MC20.MG30.AS1.I26.R4146				MC20.MG23.AS1.I1.C9819	MC20.MG24.AS1.I27.R21346					MC20.MG37.AS1.I24.R4678				MC20.MG36.AS1.I1.C905
						MC20.MG20.AS1.I22.R27032															MC20.MG31.AS1.I33.R15967	MC20.MG30.AS1.I26.R41858				MC20.MG23.AS1.I1.C9827	MC20.MG24.AS1.I27.R21459					MC20.MG37.AS1.I24.R46856				MC20.MG36.AS1.I1.C9057
						MC20.MG20.AS1.I22.R2705															MC20.MG31.AS1.I33.R16028	MC20.MG30.AS1.I26.R41975				MC20.MG23.AS1.I1.C9862	MC20.MG24.AS1.I27.R21503					MC20.MG37.AS1.I24.R46908				MC20.MG36.AS1.I1.C915
						MC20.MG20.AS1.I22.R27157															MC20.MG31.AS1.I33.R16122	MC20.MG30.AS1.I26.R42002				MC20.MG23.AS1.I1.C9896	MC20.MG24.AS1.I27.R21528					MC20.MG37.AS1.I24.R46950				MC20.MG36.AS1.I1.C9163
						MC20.MG20.AS1.I22.R27158															MC20.MG31.AS1.I33.R16313	MC20.MG30.AS1.I26.R42193				MC20.MG23.AS1.I1.C9905	MC20.MG24.AS1.I27.R21731					MC20.MG37.AS1.I24.R46953				MC20.MG36.AS1.I1.C919
						MC20.MG20.AS1.I22.R27181															MC20.MG31.AS1.I33.R1639	MC20.MG30.AS1.I26.R42710				MC20.MG23.AS1.I1.C993	MC20.MG24.AS1.I27.R2176					MC20.MG37.AS1.I24.R47051				MC20.MG36.AS1.I1.C920
						MC20.MG20.AS1.I22.R27250															MC20.MG31.AS1.I33.R16412	MC20.MG30.AS1.I26.R42876				MC20.MG23.AS1.I1.C9932	MC20.MG24.AS1.I27.R21814					MC20.MG37.AS1.I24.R47081				MC20.MG36.AS1.I1.C921
						MC20.MG20.AS1.I22.R27275															MC20.MG31.AS1.I33.R16546	MC20.MG30.AS1.I26.R43050				MC20.MG23.AS1.I1.C9936	MC20.MG24.AS1.I27.R21818					MC20.MG37.AS1.I24.R47148				MC20.MG36.AS1.I1.C9257
						MC20.MG20.AS1.I22.R27434															MC20.MG31.AS1.I33.R16638	MC20.MG30.AS1.I26.R43227				MC20.MG23.AS1.I1.C994	MC20.MG24.AS1.I27.R21837					MC20.MG37.AS1.I24.R47190				MC20.MG36.AS1.I1.C930
						MC20.MG20.AS1.I22.R27456															MC20.MG31.AS1.I33.R16847	MC20.MG30.AS1.I26.R43489				MC20.MG23.AS1.I1.C995	MC20.MG24.AS1.I27.R21843					MC20.MG37.AS1.I24.R47194				MC20.MG36.AS1.I1.C931
						MC20.MG20.AS1.I22.R27472															MC20.MG31.AS1.I33.R16875	MC20.MG30.AS1.I26.R43616				MC20.MG23.AS1.I1.C996	MC20.MG24.AS1.I27.R21950					MC20.MG37.AS1.I24.R47239				MC20.MG36.AS1.I1.C9315
						MC20.MG20.AS1.I22.R27486															MC20.MG31.AS1.I33.R16914	MC20.MG30.AS1.I26.R43628				MC20.MG23.AS1.I1.C997	MC20.MG24.AS1.I27.R21952					MC20.MG37.AS1.I24.R47435				MC20.MG36.AS1.I1.C934
						MC20.MG20.AS1.I22.R27492															MC20.MG31.AS1.I33.R17144	MC20.MG30.AS1.I26.R43656				MC20.MG23.AS1.I1.C9987	MC20.MG24.AS1.I27.R22135					MC20.MG37.AS1.I24.R47478				MC20.MG36.AS1.I1.C935
						MC20.MG20.AS1.I22.R27587															MC20.MG31.AS1.I33.R17250	MC20.MG30.AS1.I26.R4367				MC20.MG23.AS1.I10.C3	MC20.MG24.AS1.I27.R22144					MC20.MG37.AS1.I24.R47512				MC20.MG36.AS1.I1.C936
						MC20.MG20.AS1.I22.R27592															MC20.MG31.AS1.I33.R17258	MC20.MG30.AS1.I26.R43933				MC20.MG23.AS1.I14.C119	MC20.MG24.AS1.I27.R22195					MC20.MG37.AS1.I24.R47558				MC20.MG36.AS1.I1.C937
						MC20.MG20.AS1.I22.R27682															MC20.MG31.AS1.I33.R17374	MC20.MG30.AS1.I26.R44097				MC20.MG23.AS1.I14.C120	MC20.MG24.AS1.I27.R22268					MC20.MG37.AS1.I24.R47601				MC20.MG36.AS1.I1.C9451
						MC20.MG20.AS1.I22.R27722															MC20.MG31.AS1.I33.R17494	MC20.MG30.AS1.I26.R44930				MC20.MG23.AS1.I14.C161	MC20.MG24.AS1.I27.R22273					MC20.MG37.AS1.I24.R47660				MC20.MG36.AS1.I1.C9475
						MC20.MG20.AS1.I22.R27762															MC20.MG31.AS1.I33.R1764	MC20.MG30.AS1.I26.R45027				MC20.MG23.AS1.I14.C162	MC20.MG24.AS1.I27.R22430					MC20.MG37.AS1.I24.R47715				MC20.MG36.AS1.I1.C9546
						MC20.MG20.AS1.I22.R27769															MC20.MG31.AS1.I33.R18025	MC20.MG30.AS1.I26.R45403				MC20.MG23.AS1.I14.C186	MC20.MG24.AS1.I27.R22482					MC20.MG37.AS1.I24.R47797				MC20.MG36.AS1.I1.C9621
						MC20.MG20.AS1.I22.R2780															MC20.MG31.AS1.I33.R18293	MC20.MG30.AS1.I26.R45410				MC20.MG23.AS1.I14.C347	MC20.MG24.AS1.I27.R22516					MC20.MG37.AS1.I24.R47828				MC20.MG36.AS1.I1.C968
						MC20.MG20.AS1.I22.R27968															MC20.MG31.AS1.I33.R1843	MC20.MG30.AS1.I26.R45417				MC20.MG23.AS1.I14.C348	MC20.MG24.AS1.I27.R22533					MC20.MG37.AS1.I24.R47832				MC20.MG36.AS1.I1.C969
						MC20.MG20.AS1.I22.R28182															MC20.MG31.AS1.I33.R18646	MC20.MG30.AS1.I26.R45682				MC20.MG23.AS1.I18.C31	MC20.MG24.AS1.I27.R22571					MC20.MG37.AS1.I24.R47867				MC20.MG36.AS1.I1.C970
						MC20.MG20.AS1.I22.R28201															MC20.MG31.AS1.I33.R18814	MC20.MG30.AS1.I26.R45884				MC20.MG23.AS1.I18.C32	MC20.MG24.AS1.I27.R22577					MC20.MG37.AS1.I24.R47966				MC20.MG36.AS1.I1.C971
						MC20.MG20.AS1.I22.R28411															MC20.MG31.AS1.I33.R18853	MC20.MG30.AS1.I26.R46038				MC20.MG23.AS1.I19.R1013	MC20.MG24.AS1.I27.R22628					MC20.MG37.AS1.I24.R48127				MC20.MG36.AS1.I1.C972
						MC20.MG20.AS1.I22.R28564															MC20.MG31.AS1.I33.R18918	MC20.MG30.AS1.I26.R46465				MC20.MG23.AS1.I19.R10387	MC20.MG24.AS1.I27.R22640					MC20.MG37.AS1.I24.R48212				MC20.MG36.AS1.I1.C9730
						MC20.MG20.AS1.I22.R28565															MC20.MG31.AS1.I33.R18961	MC20.MG30.AS1.I26.R46852				MC20.MG23.AS1.I19.R10480	MC20.MG24.AS1.I27.R22680					MC20.MG37.AS1.I24.R48242				MC20.MG36.AS1.I1.C974
						MC20.MG20.AS1.I22.R2862															MC20.MG31.AS1.I33.R19007	MC20.MG30.AS1.I26.R46965				MC20.MG23.AS1.I19.R10538	MC20.MG24.AS1.I27.R22808					MC20.MG37.AS1.I24.R4827				MC20.MG36.AS1.I1.C975
						MC20.MG20.AS1.I22.R28668															MC20.MG31.AS1.I33.R19084	MC20.MG30.AS1.I26.R47267				MC20.MG23.AS1.I19.R10604	MC20.MG24.AS1.I27.R22932					MC20.MG37.AS1.I24.R48273				MC20.MG36.AS1.I1.C9862
						MC20.MG20.AS1.I22.R28740															MC20.MG31.AS1.I33.R19131	MC20.MG30.AS1.I26.R47391				MC20.MG23.AS1.I19.R10660	MC20.MG24.AS1.I27.R22969					MC20.MG37.AS1.I24.R48327				MC20.MG36.AS1.I1.C9896
						MC20.MG20.AS1.I22.R2876															MC20.MG31.AS1.I33.R19299	MC20.MG30.AS1.I26.R47403				MC20.MG23.AS1.I19.R10758	MC20.MG24.AS1.I27.R23088					MC20.MG37.AS1.I24.R4836				MC20.MG36.AS1.I2.C162
						MC20.MG20.AS1.I22.R28995															MC20.MG31.AS1.I33.R19312	MC20.MG30.AS1.I26.R47471				MC20.MG23.AS1.I19.R10773	MC20.MG24.AS1.I27.R23099					MC20.MG37.AS1.I24.R48370				MC20.MG36.AS1.I2.C309
						MC20.MG20.AS1.I22.R2904															MC20.MG31.AS1.I33.R19512	MC20.MG30.AS1.I26.R47659				MC20.MG23.AS1.I19.R11113	MC20.MG24.AS1.I27.R23250					MC20.MG37.AS1.I24.R48374				MC20.MG36.AS1.I25.C1475
						MC20.MG20.AS1.I22.R29057															MC20.MG31.AS1.I33.R19578	MC20.MG30.AS1.I26.R48365				MC20.MG23.AS1.I19.R11180	MC20.MG24.AS1.I27.R23288					MC20.MG37.AS1.I24.R48375				MC20.MG36.AS1.I25.C1476
						MC20.MG20.AS1.I22.R29086															MC20.MG31.AS1.I33.R19633	MC20.MG30.AS1.I26.R48658				MC20.MG23.AS1.I19.R11217	MC20.MG24.AS1.I27.R23291					MC20.MG37.AS1.I24.R48385				MC20.MG36.AS1.I25.C283
						MC20.MG20.AS1.I22.R29113															MC20.MG31.AS1.I33.R19747	MC20.MG30.AS1.I26.R48711				MC20.MG23.AS1.I19.R11533	MC20.MG24.AS1.I27.R23341					MC20.MG37.AS1.I24.R48452				MC20.MG36.AS1.I25.C284
						MC20.MG20.AS1.I22.R2925															MC20.MG31.AS1.I33.R19763	MC20.MG30.AS1.I26.R48720				MC20.MG23.AS1.I19.R11677	MC20.MG24.AS1.I27.R23444					MC20.MG37.AS1.I24.R48507				MC20.MG36.AS1.I25.C96
						MC20.MG20.AS1.I22.R29252															MC20.MG31.AS1.I33.R19810	MC20.MG30.AS1.I26.R48768				MC20.MG23.AS1.I19.R11803	MC20.MG24.AS1.I27.R23472					MC20.MG37.AS1.I24.R48565				MC20.MG36.AS1.I28.C250
						MC20.MG20.AS1.I22.R29294															MC20.MG31.AS1.I33.R19919	MC20.MG30.AS1.I26.R48874				MC20.MG23.AS1.I19.R11846	MC20.MG24.AS1.I27.R23525					MC20.MG37.AS1.I24.R48735				MC20.MG36.AS1.I28.C251
						MC20.MG20.AS1.I22.R29364															MC20.MG31.AS1.I33.R19973	MC20.MG30.AS1.I26.R49103				MC20.MG23.AS1.I19.R11967	MC20.MG24.AS1.I27.R23526					MC20.MG37.AS1.I24.R48750				MC20.MG36.AS1.I31.R10081
						MC20.MG20.AS1.I22.R29369															MC20.MG31.AS1.I33.R20000	MC20.MG30.AS1.I26.R49745				MC20.MG23.AS1.I19.R12	MC20.MG24.AS1.I27.R23528					MC20.MG37.AS1.I24.R48768				MC20.MG36.AS1.I31.R10129
						MC20.MG20.AS1.I22.R29372															MC20.MG31.AS1.I33.R20130	MC20.MG30.AS1.I26.R49918				MC20.MG23.AS1.I19.R12434	MC20.MG24.AS1.I27.R2355					MC20.MG37.AS1.I24.R48775				MC20.MG36.AS1.I31.R10177
						MC20.MG20.AS1.I22.R29430															MC20.MG31.AS1.I33.R20177	MC20.MG30.AS1.I26.R50071				MC20.MG23.AS1.I19.R12508	MC20.MG24.AS1.I27.R23584					MC20.MG37.AS1.I24.R48779				MC20.MG36.AS1.I31.R10194
						MC20.MG20.AS1.I22.R29494															MC20.MG31.AS1.I33.R20269	MC20.MG30.AS1.I26.R50112				MC20.MG23.AS1.I19.R1266	MC20.MG24.AS1.I27.R2359					MC20.MG37.AS1.I24.R48854				MC20.MG36.AS1.I31.R10296
						MC20.MG20.AS1.I22.R29688															MC20.MG31.AS1.I33.R20353	MC20.MG30.AS1.I26.R50484				MC20.MG23.AS1.I19.R12828	MC20.MG24.AS1.I27.R23608					MC20.MG37.AS1.I24.R48923				MC20.MG36.AS1.I31.R10371
						MC20.MG20.AS1.I22.R29696															MC20.MG31.AS1.I33.R20495	MC20.MG30.AS1.I26.R50543				MC20.MG23.AS1.I19.R13097	MC20.MG24.AS1.I27.R23790					MC20.MG37.AS1.I24.R48982				MC20.MG36.AS1.I31.R10408
						MC20.MG20.AS1.I22.R29859															MC20.MG31.AS1.I33.R20537	MC20.MG30.AS1.I26.R50553				MC20.MG23.AS1.I19.R13305	MC20.MG24.AS1.I27.R23796					MC20.MG37.AS1.I24.R48994				MC20.MG36.AS1.I31.R10527
						MC20.MG20.AS1.I22.R29876															MC20.MG31.AS1.I33.R20610	MC20.MG30.AS1.I26.R50620				MC20.MG23.AS1.I19.R13323	MC20.MG24.AS1.I27.R23801					MC20.MG37.AS1.I24.R4905				MC20.MG36.AS1.I31.R10532
						MC20.MG20.AS1.I22.R29912															MC20.MG31.AS1.I33.R20699	MC20.MG30.AS1.I26.R50935				MC20.MG23.AS1.I19.R13372	MC20.MG24.AS1.I27.R23823					MC20.MG37.AS1.I24.R4913				MC20.MG36.AS1.I31.R1056
						MC20.MG20.AS1.I22.R30004															MC20.MG31.AS1.I33.R20776	MC20.MG30.AS1.I26.R50980				MC20.MG23.AS1.I19.R13570	MC20.MG24.AS1.I27.R23829					MC20.MG37.AS1.I24.R49139				MC20.MG36.AS1.I31.R10795
						MC20.MG20.AS1.I22.R30133															MC20.MG31.AS1.I33.R20946	MC20.MG30.AS1.I26.R51151				MC20.MG23.AS1.I19.R13644	MC20.MG24.AS1.I27.R23842					MC20.MG37.AS1.I24.R49156				MC20.MG36.AS1.I31.R10900
						MC20.MG20.AS1.I22.R30202															MC20.MG31.AS1.I33.R21247	MC20.MG30.AS1.I26.R5118				MC20.MG23.AS1.I19.R13791	MC20.MG24.AS1.I27.R23845					MC20.MG37.AS1.I24.R49166				MC20.MG36.AS1.I31.R10920
						MC20.MG20.AS1.I22.R30205															MC20.MG31.AS1.I33.R21268	MC20.MG30.AS1.I26.R51474				MC20.MG23.AS1.I19.R13850	MC20.MG24.AS1.I27.R23886					MC20.MG37.AS1.I24.R492				MC20.MG36.AS1.I31.R111
						MC20.MG20.AS1.I22.R30562															MC20.MG31.AS1.I33.R21615	MC20.MG30.AS1.I26.R5152				MC20.MG23.AS1.I19.R13862	MC20.MG24.AS1.I27.R24096					MC20.MG37.AS1.I24.R4927				MC20.MG36.AS1.I31.R11418
						MC20.MG20.AS1.I22.R30573															MC20.MG31.AS1.I33.R21928	MC20.MG30.AS1.I26.R51664				MC20.MG23.AS1.I19.R13863	MC20.MG24.AS1.I27.R24098					MC20.MG37.AS1.I24.R49365				MC20.MG36.AS1.I31.R11420
						MC20.MG20.AS1.I22.R30659															MC20.MG31.AS1.I33.R21981	MC20.MG30.AS1.I26.R52007				MC20.MG23.AS1.I19.R13896	MC20.MG24.AS1.I27.R24125					MC20.MG37.AS1.I24.R49389				MC20.MG36.AS1.I31.R11680
						MC20.MG20.AS1.I22.R30689															MC20.MG31.AS1.I33.R22093	MC20.MG30.AS1.I26.R52102				MC20.MG23.AS1.I19.R13935	MC20.MG24.AS1.I27.R24145					MC20.MG37.AS1.I24.R49417				MC20.MG36.AS1.I31.R12056
						MC20.MG20.AS1.I22.R30727															MC20.MG31.AS1.I33.R22282	MC20.MG30.AS1.I26.R52103				MC20.MG23.AS1.I19.R14398	MC20.MG24.AS1.I27.R24194					MC20.MG37.AS1.I24.R49579				MC20.MG36.AS1.I31.R12145
						MC20.MG20.AS1.I22.R3078															MC20.MG31.AS1.I33.R22309	MC20.MG30.AS1.I26.R52330				MC20.MG23.AS1.I19.R14443	MC20.MG24.AS1.I27.R24206					MC20.MG37.AS1.I24.R49584				MC20.MG36.AS1.I31.R12342
						MC20.MG20.AS1.I22.R31083															MC20.MG31.AS1.I33.R22476	MC20.MG30.AS1.I26.R52512				MC20.MG23.AS1.I19.R14579	MC20.MG24.AS1.I27.R24240					MC20.MG37.AS1.I24.R4972				MC20.MG36.AS1.I31.R12394
						MC20.MG20.AS1.I22.R31298															MC20.MG31.AS1.I33.R22486	MC20.MG30.AS1.I26.R52814				MC20.MG23.AS1.I19.R14608	MC20.MG24.AS1.I27.R24307					MC20.MG37.AS1.I24.R49752				MC20.MG36.AS1.I31.R12506
						MC20.MG20.AS1.I22.R31311															MC20.MG31.AS1.I33.R22611	MC20.MG30.AS1.I26.R52865				MC20.MG23.AS1.I19.R14705	MC20.MG24.AS1.I27.R24311					MC20.MG37.AS1.I24.R50014				MC20.MG36.AS1.I31.R12523
						MC20.MG20.AS1.I22.R31327															MC20.MG31.AS1.I33.R22704	MC20.MG30.AS1.I26.R53095				MC20.MG23.AS1.I19.R14706	MC20.MG24.AS1.I27.R24318					MC20.MG37.AS1.I24.R5009				MC20.MG36.AS1.I31.R12609
						MC20.MG20.AS1.I22.R31370															MC20.MG31.AS1.I33.R22714	MC20.MG30.AS1.I26.R53693				MC20.MG23.AS1.I19.R14716	MC20.MG24.AS1.I27.R24393					MC20.MG37.AS1.I24.R5014				MC20.MG36.AS1.I31.R12704
						MC20.MG20.AS1.I22.R31402															MC20.MG31.AS1.I33.R22730	MC20.MG30.AS1.I26.R53806				MC20.MG23.AS1.I19.R14768	MC20.MG24.AS1.I27.R24446					MC20.MG37.AS1.I24.R50353				MC20.MG36.AS1.I31.R12763
						MC20.MG20.AS1.I22.R31831															MC20.MG31.AS1.I33.R22792	MC20.MG30.AS1.I26.R53887				MC20.MG23.AS1.I19.R15013	MC20.MG24.AS1.I27.R24505					MC20.MG37.AS1.I24.R50482				MC20.MG36.AS1.I31.R12966
						MC20.MG20.AS1.I22.R3191															MC20.MG31.AS1.I33.R22873	MC20.MG30.AS1.I26.R53953				MC20.MG23.AS1.I19.R15069	MC20.MG24.AS1.I27.R24533					MC20.MG37.AS1.I24.R5052				MC20.MG36.AS1.I31.R13005
						MC20.MG20.AS1.I22.R31955															MC20.MG31.AS1.I33.R23043	MC20.MG30.AS1.I26.R54146				MC20.MG23.AS1.I19.R15084	MC20.MG24.AS1.I27.R24628					MC20.MG37.AS1.I24.R50689				MC20.MG36.AS1.I31.R13092
						MC20.MG20.AS1.I22.R32015															MC20.MG31.AS1.I33.R23709	MC20.MG30.AS1.I26.R54515				MC20.MG23.AS1.I19.R15157	MC20.MG24.AS1.I27.R24637					MC20.MG37.AS1.I24.R50740				MC20.MG36.AS1.I31.R13381
						MC20.MG20.AS1.I22.R32042															MC20.MG31.AS1.I33.R23880	MC20.MG30.AS1.I26.R54895				MC20.MG23.AS1.I19.R15381	MC20.MG24.AS1.I27.R24720					MC20.MG37.AS1.I24.R50801				MC20.MG36.AS1.I31.R13394
						MC20.MG20.AS1.I22.R32067															MC20.MG31.AS1.I33.R24079	MC20.MG30.AS1.I26.R54993				MC20.MG23.AS1.I19.R1539	MC20.MG24.AS1.I27.R24738					MC20.MG37.AS1.I24.R50926				MC20.MG36.AS1.I31.R13473
						MC20.MG20.AS1.I22.R32207															MC20.MG31.AS1.I33.R24131	MC20.MG30.AS1.I26.R55135				MC20.MG23.AS1.I19.R15482	MC20.MG24.AS1.I27.R24768					MC20.MG37.AS1.I24.R50981				MC20.MG36.AS1.I31.R13786
						MC20.MG20.AS1.I22.R32354															MC20.MG31.AS1.I33.R24148	MC20.MG30.AS1.I26.R55241				MC20.MG23.AS1.I19.R15497	MC20.MG24.AS1.I27.R24786					MC20.MG37.AS1.I24.R51003				MC20.MG36.AS1.I31.R13797
						MC20.MG20.AS1.I22.R32421															MC20.MG31.AS1.I33.R2415	MC20.MG30.AS1.I26.R55350				MC20.MG23.AS1.I19.R15522	MC20.MG24.AS1.I27.R24790					MC20.MG37.AS1.I24.R51106				MC20.MG36.AS1.I31.R1431
						MC20.MG20.AS1.I22.R3253															MC20.MG31.AS1.I33.R24660	MC20.MG30.AS1.I26.R55386				MC20.MG23.AS1.I19.R15710	MC20.MG24.AS1.I27.R24804					MC20.MG37.AS1.I24.R51137				MC20.MG36.AS1.I31.R14320
						MC20.MG20.AS1.I22.R32674															MC20.MG31.AS1.I33.R24760	MC20.MG30.AS1.I26.R55447				MC20.MG23.AS1.I19.R15720	MC20.MG24.AS1.I27.R24872					MC20.MG37.AS1.I24.R51156				MC20.MG36.AS1.I31.R14347
						MC20.MG20.AS1.I22.R32707															MC20.MG31.AS1.I33.R24770	MC20.MG30.AS1.I26.R55460				MC20.MG23.AS1.I19.R158	MC20.MG24.AS1.I27.R24975					MC20.MG37.AS1.I24.R51191				MC20.MG36.AS1.I31.R14453
						MC20.MG20.AS1.I22.R32922															MC20.MG31.AS1.I33.R24806	MC20.MG30.AS1.I26.R55808				MC20.MG23.AS1.I19.R15856	MC20.MG24.AS1.I27.R25163					MC20.MG37.AS1.I24.R51271				MC20.MG36.AS1.I31.R14613
						MC20.MG20.AS1.I22.R32951															MC20.MG31.AS1.I33.R24975	MC20.MG30.AS1.I26.R56007				MC20.MG23.AS1.I19.R16065	MC20.MG24.AS1.I27.R2517					MC20.MG37.AS1.I24.R5134				MC20.MG36.AS1.I31.R14713
						MC20.MG20.AS1.I22.R32987															MC20.MG31.AS1.I33.R25068	MC20.MG30.AS1.I26.R56107				MC20.MG23.AS1.I19.R16210	MC20.MG24.AS1.I27.R25225					MC20.MG37.AS1.I24.R51491				MC20.MG36.AS1.I31.R14730
						MC20.MG20.AS1.I22.R33069															MC20.MG31.AS1.I33.R25151	MC20.MG30.AS1.I26.R56159				MC20.MG23.AS1.I19.R16306	MC20.MG24.AS1.I27.R25275					MC20.MG37.AS1.I24.R51643				MC20.MG36.AS1.I31.R15181
						MC20.MG20.AS1.I22.R33221															MC20.MG31.AS1.I33.R25208	MC20.MG30.AS1.I26.R56269				MC20.MG23.AS1.I19.R16338	MC20.MG24.AS1.I27.R25547					MC20.MG37.AS1.I24.R51668				MC20.MG36.AS1.I31.R15389
						MC20.MG20.AS1.I22.R33302															MC20.MG31.AS1.I33.R25352	MC20.MG30.AS1.I26.R5674				MC20.MG23.AS1.I19.R16433	MC20.MG24.AS1.I27.R25607					MC20.MG37.AS1.I24.R51893				MC20.MG36.AS1.I31.R15571
						MC20.MG20.AS1.I22.R33325															MC20.MG31.AS1.I33.R25379	MC20.MG30.AS1.I26.R56740				MC20.MG23.AS1.I19.R16514	MC20.MG24.AS1.I27.R2568					MC20.MG37.AS1.I24.R51968				MC20.MG36.AS1.I31.R15619
						MC20.MG20.AS1.I22.R33328															MC20.MG31.AS1.I33.R25540	MC20.MG30.AS1.I26.R56766				MC20.MG23.AS1.I19.R16631	MC20.MG24.AS1.I27.R2572					MC20.MG37.AS1.I24.R52149				MC20.MG36.AS1.I31.R15650
						MC20.MG20.AS1.I22.R3341															MC20.MG31.AS1.I33.R25635	MC20.MG30.AS1.I26.R56852				MC20.MG23.AS1.I19.R16638	MC20.MG24.AS1.I27.R2577					MC20.MG37.AS1.I24.R52163				MC20.MG36.AS1.I31.R1580
						MC20.MG20.AS1.I22.R33410															MC20.MG31.AS1.I33.R2585	MC20.MG30.AS1.I26.R57282				MC20.MG23.AS1.I19.R16656	MC20.MG24.AS1.I27.R25793					MC20.MG37.AS1.I24.R52183				MC20.MG36.AS1.I31.R15867
						MC20.MG20.AS1.I22.R33442															MC20.MG31.AS1.I33.R25885	MC20.MG30.AS1.I26.R57355				MC20.MG23.AS1.I19.R16921	MC20.MG24.AS1.I27.R25871					MC20.MG37.AS1.I24.R52272				MC20.MG36.AS1.I31.R16918
						MC20.MG20.AS1.I22.R33784															MC20.MG31.AS1.I33.R25906	MC20.MG30.AS1.I26.R57371				MC20.MG23.AS1.I19.R17152	MC20.MG24.AS1.I27.R26083					MC20.MG37.AS1.I24.R5231				MC20.MG36.AS1.I31.R16998
						MC20.MG20.AS1.I22.R33918															MC20.MG31.AS1.I33.R26034	MC20.MG30.AS1.I26.R57827				MC20.MG23.AS1.I19.R17215	MC20.MG24.AS1.I27.R26107					MC20.MG37.AS1.I24.R52368				MC20.MG36.AS1.I31.R17033
						MC20.MG20.AS1.I22.R3399															MC20.MG31.AS1.I33.R26074	MC20.MG30.AS1.I26.R58184				MC20.MG23.AS1.I19.R17344	MC20.MG24.AS1.I27.R26115					MC20.MG37.AS1.I24.R52679				MC20.MG36.AS1.I31.R17178
						MC20.MG20.AS1.I22.R34006															MC20.MG31.AS1.I33.R26135	MC20.MG30.AS1.I26.R58290				MC20.MG23.AS1.I19.R17354	MC20.MG24.AS1.I27.R26230					MC20.MG37.AS1.I24.R52744				MC20.MG36.AS1.I31.R17187
						MC20.MG20.AS1.I22.R34034															MC20.MG31.AS1.I33.R26237	MC20.MG30.AS1.I26.R58532				MC20.MG23.AS1.I19.R17499	MC20.MG24.AS1.I27.R2624					MC20.MG37.AS1.I24.R52768				MC20.MG36.AS1.I31.R17443
						MC20.MG20.AS1.I22.R34122															MC20.MG31.AS1.I33.R26287	MC20.MG30.AS1.I26.R58619				MC20.MG23.AS1.I19.R17559	MC20.MG24.AS1.I27.R26244					MC20.MG37.AS1.I24.R5279				MC20.MG36.AS1.I31.R17695
						MC20.MG20.AS1.I22.R34133															MC20.MG31.AS1.I33.R26294	MC20.MG30.AS1.I26.R58640				MC20.MG23.AS1.I19.R17822	MC20.MG24.AS1.I27.R26245					MC20.MG37.AS1.I24.R52794				MC20.MG36.AS1.I31.R17737
						MC20.MG20.AS1.I22.R34276															MC20.MG31.AS1.I33.R26401	MC20.MG30.AS1.I26.R58674				MC20.MG23.AS1.I19.R18024	MC20.MG24.AS1.I27.R26271					MC20.MG37.AS1.I24.R52858				MC20.MG36.AS1.I31.R17744
						MC20.MG20.AS1.I22.R34399															MC20.MG31.AS1.I33.R26429	MC20.MG30.AS1.I26.R58731				MC20.MG23.AS1.I19.R18099	MC20.MG24.AS1.I27.R26406					MC20.MG37.AS1.I24.R52867				MC20.MG36.AS1.I31.R17781
						MC20.MG20.AS1.I22.R34432															MC20.MG31.AS1.I33.R26462	MC20.MG30.AS1.I26.R5875				MC20.MG23.AS1.I19.R18119	MC20.MG24.AS1.I27.R26449					MC20.MG37.AS1.I24.R5287				MC20.MG36.AS1.I31.R17865
						MC20.MG20.AS1.I22.R3446															MC20.MG31.AS1.I33.R26776	MC20.MG30.AS1.I26.R58843				MC20.MG23.AS1.I19.R18166	MC20.MG24.AS1.I27.R26496					MC20.MG37.AS1.I24.R52876				MC20.MG36.AS1.I31.R17937
						MC20.MG20.AS1.I22.R34473															MC20.MG31.AS1.I33.R26838	MC20.MG30.AS1.I26.R59071				MC20.MG23.AS1.I19.R18510	MC20.MG24.AS1.I27.R26502					MC20.MG37.AS1.I24.R5289				MC20.MG36.AS1.I31.R18013
						MC20.MG20.AS1.I22.R34508															MC20.MG31.AS1.I33.R26879	MC20.MG30.AS1.I26.R59154				MC20.MG23.AS1.I19.R18564	MC20.MG24.AS1.I27.R26529					MC20.MG37.AS1.I24.R5295				MC20.MG36.AS1.I31.R18020
						MC20.MG20.AS1.I22.R34650															MC20.MG31.AS1.I33.R26907	MC20.MG30.AS1.I26.R6001				MC20.MG23.AS1.I19.R18632	MC20.MG24.AS1.I27.R26663					MC20.MG37.AS1.I24.R52968				MC20.MG36.AS1.I31.R18027
						MC20.MG20.AS1.I22.R34710															MC20.MG31.AS1.I33.R26910	MC20.MG30.AS1.I26.R60082				MC20.MG23.AS1.I19.R18638	MC20.MG24.AS1.I27.R26733					MC20.MG37.AS1.I24.R53152				MC20.MG36.AS1.I31.R18072
						MC20.MG20.AS1.I22.R3473															MC20.MG31.AS1.I33.R27415	MC20.MG30.AS1.I26.R6030				MC20.MG23.AS1.I19.R18680	MC20.MG24.AS1.I27.R26740					MC20.MG37.AS1.I24.R53183				MC20.MG36.AS1.I31.R18233
						MC20.MG20.AS1.I22.R34761															MC20.MG31.AS1.I33.R27449	MC20.MG30.AS1.I26.R60323				MC20.MG23.AS1.I19.R18718	MC20.MG24.AS1.I27.R26831					MC20.MG37.AS1.I24.R53184				MC20.MG36.AS1.I31.R18413
						MC20.MG20.AS1.I22.R34773															MC20.MG31.AS1.I33.R28306	MC20.MG30.AS1.I26.R60384				MC20.MG23.AS1.I19.R18790	MC20.MG24.AS1.I27.R26841					MC20.MG37.AS1.I24.R53274				MC20.MG36.AS1.I31.R1856
						MC20.MG20.AS1.I22.R3480															MC20.MG31.AS1.I33.R28535	MC20.MG30.AS1.I26.R60606				MC20.MG23.AS1.I19.R1881	MC20.MG24.AS1.I27.R26849					MC20.MG37.AS1.I24.R53410				MC20.MG36.AS1.I31.R18881
						MC20.MG20.AS1.I22.R34806															MC20.MG31.AS1.I33.R28645	MC20.MG30.AS1.I26.R60825				MC20.MG23.AS1.I19.R18953	MC20.MG24.AS1.I27.R27005					MC20.MG37.AS1.I24.R53467				MC20.MG36.AS1.I31.R18886
						MC20.MG20.AS1.I22.R34855															MC20.MG31.AS1.I33.R28871	MC20.MG30.AS1.I26.R60839				MC20.MG23.AS1.I19.R19106	MC20.MG24.AS1.I27.R27018					MC20.MG37.AS1.I24.R53505				MC20.MG36.AS1.I31.R19034
						MC20.MG20.AS1.I22.R35010															MC20.MG31.AS1.I33.R28923	MC20.MG30.AS1.I26.R60842				MC20.MG23.AS1.I19.R19124	MC20.MG24.AS1.I27.R27103					MC20.MG37.AS1.I24.R5364				MC20.MG36.AS1.I31.R19051
						MC20.MG20.AS1.I22.R35075															MC20.MG31.AS1.I33.R29043	MC20.MG30.AS1.I26.R60921				MC20.MG23.AS1.I19.R19194	MC20.MG24.AS1.I27.R27157					MC20.MG37.AS1.I24.R53740				MC20.MG36.AS1.I31.R19056
						MC20.MG20.AS1.I22.R35082															MC20.MG31.AS1.I33.R29207	MC20.MG30.AS1.I26.R60951				MC20.MG23.AS1.I19.R19222	MC20.MG24.AS1.I27.R27191					MC20.MG37.AS1.I24.R53746				MC20.MG36.AS1.I31.R19270
						MC20.MG20.AS1.I22.R35192															MC20.MG31.AS1.I33.R29261	MC20.MG30.AS1.I26.R61119				MC20.MG23.AS1.I19.R19326	MC20.MG24.AS1.I27.R27248					MC20.MG37.AS1.I24.R53811				MC20.MG36.AS1.I31.R19543
						MC20.MG20.AS1.I22.R35232															MC20.MG31.AS1.I33.R29269	MC20.MG30.AS1.I26.R61170				MC20.MG23.AS1.I19.R19551	MC20.MG24.AS1.I27.R27278					MC20.MG37.AS1.I24.R5396				MC20.MG36.AS1.I31.R1964
						MC20.MG20.AS1.I22.R35257															MC20.MG31.AS1.I33.R2927	MC20.MG30.AS1.I26.R61842				MC20.MG23.AS1.I19.R19704	MC20.MG24.AS1.I27.R27326					MC20.MG37.AS1.I24.R53976				MC20.MG36.AS1.I31.R19662
						MC20.MG20.AS1.I22.R35356															MC20.MG31.AS1.I33.R29412	MC20.MG30.AS1.I26.R62134				MC20.MG23.AS1.I19.R19902	MC20.MG24.AS1.I27.R27407					MC20.MG37.AS1.I24.R54024				MC20.MG36.AS1.I31.R19709
						MC20.MG20.AS1.I22.R35379															MC20.MG31.AS1.I33.R29451	MC20.MG30.AS1.I26.R62469				MC20.MG23.AS1.I19.R19904	MC20.MG24.AS1.I27.R27453					MC20.MG37.AS1.I24.R54071				MC20.MG36.AS1.I31.R19830
						MC20.MG20.AS1.I22.R35465															MC20.MG31.AS1.I33.R29603	MC20.MG30.AS1.I26.R62707				MC20.MG23.AS1.I19.R20197	MC20.MG24.AS1.I27.R2755					MC20.MG37.AS1.I24.R541				MC20.MG36.AS1.I31.R19959
						MC20.MG20.AS1.I22.R35483															MC20.MG31.AS1.I33.R29704	MC20.MG30.AS1.I26.R62763				MC20.MG23.AS1.I19.R20444	MC20.MG24.AS1.I27.R27554					MC20.MG37.AS1.I24.R54341				MC20.MG36.AS1.I31.R2013
						MC20.MG20.AS1.I22.R35649															MC20.MG31.AS1.I33.R29713	MC20.MG30.AS1.I26.R62982				MC20.MG23.AS1.I19.R20514	MC20.MG24.AS1.I27.R27589					MC20.MG37.AS1.I24.R54371				MC20.MG36.AS1.I31.R20218
						MC20.MG20.AS1.I22.R35679															MC20.MG31.AS1.I33.R29865	MC20.MG30.AS1.I26.R63107				MC20.MG23.AS1.I19.R20525	MC20.MG24.AS1.I27.R27623					MC20.MG37.AS1.I24.R54497				MC20.MG36.AS1.I31.R20230
						MC20.MG20.AS1.I22.R35699															MC20.MG31.AS1.I33.R29973	MC20.MG30.AS1.I26.R63255				MC20.MG23.AS1.I19.R20557	MC20.MG24.AS1.I27.R27647					MC20.MG37.AS1.I24.R5457				MC20.MG36.AS1.I31.R20295
						MC20.MG20.AS1.I22.R35826															MC20.MG31.AS1.I33.R30125	MC20.MG30.AS1.I26.R63539				MC20.MG23.AS1.I19.R20561	MC20.MG24.AS1.I27.R27671					MC20.MG37.AS1.I24.R54625				MC20.MG36.AS1.I31.R2043
						MC20.MG20.AS1.I22.R35954															MC20.MG31.AS1.I33.R30187	MC20.MG30.AS1.I26.R63826				MC20.MG23.AS1.I19.R20603	MC20.MG24.AS1.I27.R27762					MC20.MG37.AS1.I24.R54640				MC20.MG36.AS1.I31.R20549
						MC20.MG20.AS1.I22.R35997															MC20.MG31.AS1.I33.R30327	MC20.MG30.AS1.I26.R63885				MC20.MG23.AS1.I19.R20622	MC20.MG24.AS1.I27.R27788					MC20.MG37.AS1.I24.R54684				MC20.MG36.AS1.I31.R20617
						MC20.MG20.AS1.I22.R36025															MC20.MG31.AS1.I33.R3055	MC20.MG30.AS1.I26.R63910				MC20.MG23.AS1.I19.R20650	MC20.MG24.AS1.I27.R27792					MC20.MG37.AS1.I24.R54758				MC20.MG36.AS1.I31.R20643
						MC20.MG20.AS1.I22.R36134															MC20.MG31.AS1.I33.R30603	MC20.MG30.AS1.I26.R64032				MC20.MG23.AS1.I19.R20867	MC20.MG24.AS1.I27.R27843					MC20.MG37.AS1.I24.R54774				MC20.MG36.AS1.I31.R20862
						MC20.MG20.AS1.I22.R36275															MC20.MG31.AS1.I33.R30607	MC20.MG30.AS1.I26.R64037				MC20.MG23.AS1.I19.R20870	MC20.MG24.AS1.I27.R27855					MC20.MG37.AS1.I24.R54805				MC20.MG36.AS1.I31.R20999
						MC20.MG20.AS1.I22.R36292															MC20.MG31.AS1.I33.R30652	MC20.MG30.AS1.I26.R64144				MC20.MG23.AS1.I19.R20913	MC20.MG24.AS1.I27.R27870					MC20.MG37.AS1.I24.R54827				MC20.MG36.AS1.I31.R21046
						MC20.MG20.AS1.I22.R36301															MC20.MG31.AS1.I33.R30663	MC20.MG30.AS1.I26.R64212				MC20.MG23.AS1.I19.R21015	MC20.MG24.AS1.I27.R27897					MC20.MG37.AS1.I24.R54874				MC20.MG36.AS1.I31.R2138
						MC20.MG20.AS1.I22.R36330															MC20.MG31.AS1.I33.R30786	MC20.MG30.AS1.I26.R64263				MC20.MG23.AS1.I19.R21084	MC20.MG24.AS1.I27.R279					MC20.MG37.AS1.I24.R54882				MC20.MG36.AS1.I31.R21395
						MC20.MG20.AS1.I22.R36406															MC20.MG31.AS1.I33.R30808	MC20.MG30.AS1.I26.R64552				MC20.MG23.AS1.I19.R21220	MC20.MG24.AS1.I27.R2791					MC20.MG37.AS1.I24.R54889				MC20.MG36.AS1.I31.R21548
						MC20.MG20.AS1.I22.R36438															MC20.MG31.AS1.I33.R30880	MC20.MG30.AS1.I26.R64558				MC20.MG23.AS1.I19.R21311	MC20.MG24.AS1.I27.R27991					MC20.MG37.AS1.I24.R54967				MC20.MG36.AS1.I31.R21689
						MC20.MG20.AS1.I22.R36465															MC20.MG31.AS1.I33.R30896	MC20.MG30.AS1.I26.R6461				MC20.MG23.AS1.I19.R21344	MC20.MG24.AS1.I27.R28047					MC20.MG37.AS1.I24.R55063				MC20.MG36.AS1.I31.R21862
						MC20.MG20.AS1.I22.R36514															MC20.MG31.AS1.I33.R31039	MC20.MG30.AS1.I26.R65211				MC20.MG23.AS1.I19.R21364	MC20.MG24.AS1.I27.R28059					MC20.MG37.AS1.I24.R5519				MC20.MG36.AS1.I31.R21928
						MC20.MG20.AS1.I22.R36518															MC20.MG31.AS1.I33.R31145	MC20.MG30.AS1.I26.R65483				MC20.MG23.AS1.I19.R21468	MC20.MG24.AS1.I27.R28089					MC20.MG37.AS1.I24.R55256				MC20.MG36.AS1.I31.R2196
						MC20.MG20.AS1.I22.R36521															MC20.MG31.AS1.I33.R31163	MC20.MG30.AS1.I26.R65656				MC20.MG23.AS1.I19.R21543	MC20.MG24.AS1.I27.R28132					MC20.MG37.AS1.I24.R55271				MC20.MG36.AS1.I31.R22017
						MC20.MG20.AS1.I22.R36628															MC20.MG31.AS1.I33.R31240	MC20.MG30.AS1.I26.R65810				MC20.MG23.AS1.I19.R218	MC20.MG24.AS1.I27.R28188					MC20.MG37.AS1.I24.R5533				MC20.MG36.AS1.I31.R22215
						MC20.MG20.AS1.I22.R36634															MC20.MG31.AS1.I33.R31254	MC20.MG30.AS1.I26.R65867				MC20.MG23.AS1.I19.R22168	MC20.MG24.AS1.I27.R28218					MC20.MG37.AS1.I24.R55407				MC20.MG36.AS1.I31.R22340
						MC20.MG20.AS1.I22.R3664															MC20.MG31.AS1.I33.R31299	MC20.MG30.AS1.I26.R65868				MC20.MG23.AS1.I19.R22350	MC20.MG24.AS1.I27.R28273					MC20.MG37.AS1.I24.R55410				MC20.MG36.AS1.I31.R22705
						MC20.MG20.AS1.I22.R3669															MC20.MG31.AS1.I33.R31630	MC20.MG30.AS1.I26.R65917				MC20.MG23.AS1.I19.R22474	MC20.MG24.AS1.I27.R28274					MC20.MG37.AS1.I24.R55460				MC20.MG36.AS1.I31.R22908
						MC20.MG20.AS1.I22.R36853															MC20.MG31.AS1.I33.R31695	MC20.MG30.AS1.I26.R66010				MC20.MG23.AS1.I19.R22639	MC20.MG24.AS1.I27.R28346					MC20.MG37.AS1.I24.R55469				MC20.MG36.AS1.I31.R22951
						MC20.MG20.AS1.I22.R3687															MC20.MG31.AS1.I33.R31721	MC20.MG30.AS1.I26.R66081				MC20.MG23.AS1.I19.R22650	MC20.MG24.AS1.I27.R28375					MC20.MG37.AS1.I24.R55506				MC20.MG36.AS1.I31.R23303
						MC20.MG20.AS1.I22.R36926															MC20.MG31.AS1.I33.R31748	MC20.MG30.AS1.I26.R66296				MC20.MG23.AS1.I19.R22736	MC20.MG24.AS1.I27.R28444					MC20.MG37.AS1.I24.R55530				MC20.MG36.AS1.I31.R2365
						MC20.MG20.AS1.I22.R3694															MC20.MG31.AS1.I33.R31760	MC20.MG30.AS1.I26.R66363				MC20.MG23.AS1.I19.R22787	MC20.MG24.AS1.I27.R28468					MC20.MG37.AS1.I24.R55548				MC20.MG36.AS1.I31.R23926
						MC20.MG20.AS1.I22.R37062															MC20.MG31.AS1.I33.R31848	MC20.MG30.AS1.I26.R66456				MC20.MG23.AS1.I19.R23138	MC20.MG24.AS1.I27.R285					MC20.MG37.AS1.I24.R55710				MC20.MG36.AS1.I31.R24206
						MC20.MG20.AS1.I22.R37170															MC20.MG31.AS1.I33.R31945	MC20.MG30.AS1.I26.R66543				MC20.MG23.AS1.I19.R23185	MC20.MG24.AS1.I27.R28515					MC20.MG37.AS1.I24.R55902				MC20.MG36.AS1.I31.R2423
						MC20.MG20.AS1.I22.R37184															MC20.MG31.AS1.I33.R31956	MC20.MG30.AS1.I26.R66863				MC20.MG23.AS1.I19.R23207	MC20.MG24.AS1.I27.R28713					MC20.MG37.AS1.I24.R55984				MC20.MG36.AS1.I31.R24243
						MC20.MG20.AS1.I22.R37664															MC20.MG31.AS1.I33.R32155	MC20.MG30.AS1.I26.R67064				MC20.MG23.AS1.I19.R23348	MC20.MG24.AS1.I27.R28885					MC20.MG37.AS1.I24.R55989				MC20.MG36.AS1.I31.R24255
						MC20.MG20.AS1.I22.R37686															MC20.MG31.AS1.I33.R32276	MC20.MG30.AS1.I26.R67157				MC20.MG23.AS1.I19.R23368	MC20.MG24.AS1.I27.R28911					MC20.MG37.AS1.I24.R5602				MC20.MG36.AS1.I31.R24744
						MC20.MG20.AS1.I22.R37717															MC20.MG31.AS1.I33.R32306	MC20.MG30.AS1.I26.R67405				MC20.MG23.AS1.I19.R23418	MC20.MG24.AS1.I27.R28947					MC20.MG37.AS1.I24.R56030				MC20.MG36.AS1.I31.R24803
						MC20.MG20.AS1.I22.R37728															MC20.MG31.AS1.I33.R325	MC20.MG30.AS1.I26.R67525				MC20.MG23.AS1.I19.R23440	MC20.MG24.AS1.I27.R290					MC20.MG37.AS1.I24.R56089				MC20.MG36.AS1.I31.R2515
						MC20.MG20.AS1.I22.R37758															MC20.MG31.AS1.I33.R32566	MC20.MG30.AS1.I26.R67753				MC20.MG23.AS1.I19.R23457	MC20.MG24.AS1.I27.R29051					MC20.MG37.AS1.I24.R56263				MC20.MG36.AS1.I31.R25207
						MC20.MG20.AS1.I22.R3785															MC20.MG31.AS1.I33.R32757	MC20.MG30.AS1.I26.R67806				MC20.MG23.AS1.I19.R23483	MC20.MG24.AS1.I27.R29052					MC20.MG37.AS1.I24.R56297				MC20.MG36.AS1.I31.R25241
						MC20.MG20.AS1.I22.R37887															MC20.MG31.AS1.I33.R32925	MC20.MG30.AS1.I26.R68092				MC20.MG23.AS1.I19.R23585	MC20.MG24.AS1.I27.R29080					MC20.MG37.AS1.I24.R56382				MC20.MG36.AS1.I31.R25246
						MC20.MG20.AS1.I22.R3802															MC20.MG31.AS1.I33.R33160	MC20.MG30.AS1.I26.R68498				MC20.MG23.AS1.I19.R23630	MC20.MG24.AS1.I27.R29099					MC20.MG37.AS1.I24.R56428				MC20.MG36.AS1.I31.R25256
						MC20.MG20.AS1.I22.R38041															MC20.MG31.AS1.I33.R33188	MC20.MG30.AS1.I26.R68512				MC20.MG23.AS1.I19.R23636	MC20.MG24.AS1.I27.R29111					MC20.MG37.AS1.I24.R56434				MC20.MG36.AS1.I31.R25454
						MC20.MG20.AS1.I22.R38060															MC20.MG31.AS1.I33.R33223	MC20.MG30.AS1.I26.R68852				MC20.MG23.AS1.I19.R23723	MC20.MG24.AS1.I27.R29130					MC20.MG37.AS1.I24.R56449				MC20.MG36.AS1.I31.R25913
						MC20.MG20.AS1.I22.R38095															MC20.MG31.AS1.I33.R33295	MC20.MG30.AS1.I26.R69094				MC20.MG23.AS1.I19.R239	MC20.MG24.AS1.I27.R29142					MC20.MG37.AS1.I24.R56455				MC20.MG36.AS1.I31.R26104
						MC20.MG20.AS1.I22.R38159															MC20.MG31.AS1.I33.R33449	MC20.MG30.AS1.I26.R69106				MC20.MG23.AS1.I19.R23908	MC20.MG24.AS1.I27.R29203					MC20.MG37.AS1.I24.R56592				MC20.MG36.AS1.I31.R26163
						MC20.MG20.AS1.I22.R38160															MC20.MG31.AS1.I33.R33586	MC20.MG30.AS1.I26.R69188				MC20.MG23.AS1.I19.R23957	MC20.MG24.AS1.I27.R29204					MC20.MG37.AS1.I24.R56685				MC20.MG36.AS1.I31.R26426
						MC20.MG20.AS1.I22.R38199															MC20.MG31.AS1.I33.R33662	MC20.MG30.AS1.I26.R69222				MC20.MG23.AS1.I19.R23975	MC20.MG24.AS1.I27.R29304					MC20.MG37.AS1.I24.R56916				MC20.MG36.AS1.I31.R26437
						MC20.MG20.AS1.I22.R38408															MC20.MG31.AS1.I33.R33678	MC20.MG30.AS1.I26.R69475				MC20.MG23.AS1.I19.R23993	MC20.MG24.AS1.I27.R29363					MC20.MG37.AS1.I24.R56998				MC20.MG36.AS1.I31.R26471
						MC20.MG20.AS1.I22.R38451															MC20.MG31.AS1.I33.R33679	MC20.MG30.AS1.I26.R69621				MC20.MG23.AS1.I19.R24023	MC20.MG24.AS1.I27.R2938					MC20.MG37.AS1.I24.R57004				MC20.MG36.AS1.I31.R26540
						MC20.MG20.AS1.I22.R38454															MC20.MG31.AS1.I33.R3373	MC20.MG30.AS1.I26.R69790				MC20.MG23.AS1.I19.R24055	MC20.MG24.AS1.I27.R2955					MC20.MG37.AS1.I24.R57007				MC20.MG36.AS1.I31.R26579
						MC20.MG20.AS1.I22.R38509															MC20.MG31.AS1.I33.R33746	MC20.MG30.AS1.I26.R6992				MC20.MG23.AS1.I19.R24085	MC20.MG24.AS1.I27.R29589					MC20.MG37.AS1.I24.R57197				MC20.MG36.AS1.I31.R26706
						MC20.MG20.AS1.I22.R38530															MC20.MG31.AS1.I33.R33819	MC20.MG30.AS1.I26.R70029				MC20.MG23.AS1.I19.R24108	MC20.MG24.AS1.I27.R29642					MC20.MG37.AS1.I24.R57205				MC20.MG36.AS1.I31.R26786
						MC20.MG20.AS1.I22.R38554															MC20.MG31.AS1.I33.R34076	MC20.MG30.AS1.I26.R70452				MC20.MG23.AS1.I19.R24129	MC20.MG24.AS1.I27.R2965					MC20.MG37.AS1.I24.R57228				MC20.MG36.AS1.I31.R26997
						MC20.MG20.AS1.I22.R38620															MC20.MG31.AS1.I33.R34135	MC20.MG30.AS1.I26.R70488				MC20.MG23.AS1.I19.R24195	MC20.MG24.AS1.I27.R2968					MC20.MG37.AS1.I24.R57290				MC20.MG36.AS1.I31.R27064
						MC20.MG20.AS1.I22.R38699															MC20.MG31.AS1.I33.R34257	MC20.MG30.AS1.I26.R70745				MC20.MG23.AS1.I19.R24813	MC20.MG24.AS1.I27.R29761					MC20.MG37.AS1.I24.R57521				MC20.MG36.AS1.I31.R27092
						MC20.MG20.AS1.I22.R38873															MC20.MG31.AS1.I33.R3430	MC20.MG30.AS1.I26.R70798				MC20.MG23.AS1.I19.R24820	MC20.MG24.AS1.I27.R29879					MC20.MG37.AS1.I24.R57531				MC20.MG36.AS1.I31.R27113
						MC20.MG20.AS1.I22.R3889															MC20.MG31.AS1.I33.R34386	MC20.MG30.AS1.I26.R70856				MC20.MG23.AS1.I19.R25045	MC20.MG24.AS1.I27.R29888					MC20.MG37.AS1.I24.R57652				MC20.MG36.AS1.I31.R2717
						MC20.MG20.AS1.I22.R38896															MC20.MG31.AS1.I33.R34438	MC20.MG30.AS1.I26.R71107				MC20.MG23.AS1.I19.R25046	MC20.MG24.AS1.I27.R29979					MC20.MG37.AS1.I24.R5766				MC20.MG36.AS1.I31.R27213
						MC20.MG20.AS1.I22.R38960															MC20.MG31.AS1.I33.R34499	MC20.MG30.AS1.I26.R71322				MC20.MG23.AS1.I19.R25080	MC20.MG24.AS1.I27.R3003					MC20.MG37.AS1.I24.R57698				MC20.MG36.AS1.I31.R27272
						MC20.MG20.AS1.I22.R38967															MC20.MG31.AS1.I33.R34614	MC20.MG30.AS1.I26.R71327				MC20.MG23.AS1.I19.R2509	MC20.MG24.AS1.I27.R30110					MC20.MG37.AS1.I24.R57756				MC20.MG36.AS1.I31.R27551
						MC20.MG20.AS1.I22.R38980															MC20.MG31.AS1.I33.R34681	MC20.MG30.AS1.I26.R72002				MC20.MG23.AS1.I19.R25091	MC20.MG24.AS1.I27.R30158					MC20.MG37.AS1.I24.R57947				MC20.MG36.AS1.I31.R27759
						MC20.MG20.AS1.I22.R39000															MC20.MG31.AS1.I33.R34767	MC20.MG30.AS1.I26.R72429				MC20.MG23.AS1.I19.R25242	MC20.MG24.AS1.I27.R30353					MC20.MG37.AS1.I24.R57980				MC20.MG36.AS1.I31.R27855
						MC20.MG20.AS1.I22.R39139															MC20.MG31.AS1.I33.R34831	MC20.MG30.AS1.I26.R72462				MC20.MG23.AS1.I19.R25291	MC20.MG24.AS1.I27.R30424					MC20.MG37.AS1.I24.R58043				MC20.MG36.AS1.I31.R28153
						MC20.MG20.AS1.I22.R39242															MC20.MG31.AS1.I33.R35075	MC20.MG30.AS1.I26.R72700				MC20.MG23.AS1.I19.R2546	MC20.MG24.AS1.I27.R30505					MC20.MG37.AS1.I24.R58128				MC20.MG36.AS1.I31.R28254
						MC20.MG20.AS1.I22.R39278															MC20.MG31.AS1.I33.R35081	MC20.MG30.AS1.I26.R7282				MC20.MG23.AS1.I19.R25460	MC20.MG24.AS1.I27.R30507					MC20.MG37.AS1.I24.R58145				MC20.MG36.AS1.I31.R28573
						MC20.MG20.AS1.I22.R39414															MC20.MG31.AS1.I33.R35254	MC20.MG30.AS1.I26.R72860				MC20.MG23.AS1.I19.R25471	MC20.MG24.AS1.I27.R30569					MC20.MG37.AS1.I24.R5817				MC20.MG36.AS1.I31.R28753
						MC20.MG20.AS1.I22.R39440															MC20.MG31.AS1.I33.R35317	MC20.MG30.AS1.I26.R73001				MC20.MG23.AS1.I19.R25609	MC20.MG24.AS1.I27.R30725					MC20.MG37.AS1.I24.R58173				MC20.MG36.AS1.I31.R28844
						MC20.MG20.AS1.I22.R39452															MC20.MG31.AS1.I33.R35351	MC20.MG30.AS1.I26.R7321				MC20.MG23.AS1.I19.R25634	MC20.MG24.AS1.I27.R30759					MC20.MG37.AS1.I24.R58179				MC20.MG36.AS1.I31.R29080
						MC20.MG20.AS1.I22.R39461															MC20.MG31.AS1.I33.R3540	MC20.MG30.AS1.I26.R73284				MC20.MG23.AS1.I19.R2565	MC20.MG24.AS1.I27.R30761					MC20.MG37.AS1.I24.R58225				MC20.MG36.AS1.I31.R29105
						MC20.MG20.AS1.I22.R39752															MC20.MG31.AS1.I33.R35483	MC20.MG30.AS1.I26.R73318				MC20.MG23.AS1.I19.R25754	MC20.MG24.AS1.I27.R30771					MC20.MG37.AS1.I24.R5838				MC20.MG36.AS1.I31.R29112
						MC20.MG20.AS1.I22.R39883															MC20.MG31.AS1.I33.R35506	MC20.MG30.AS1.I26.R73602				MC20.MG23.AS1.I19.R25801	MC20.MG24.AS1.I27.R30778					MC20.MG37.AS1.I24.R58406				MC20.MG36.AS1.I31.R29115
						MC20.MG20.AS1.I22.R39900															MC20.MG31.AS1.I33.R35522	MC20.MG30.AS1.I26.R7370				MC20.MG23.AS1.I19.R25914	MC20.MG24.AS1.I27.R30785					MC20.MG37.AS1.I24.R58469				MC20.MG36.AS1.I31.R29533
						MC20.MG20.AS1.I22.R40013															MC20.MG31.AS1.I33.R35702	MC20.MG30.AS1.I26.R73957				MC20.MG23.AS1.I19.R25926	MC20.MG24.AS1.I27.R30788					MC20.MG37.AS1.I24.R58506				MC20.MG36.AS1.I31.R29600
						MC20.MG20.AS1.I22.R40047															MC20.MG31.AS1.I33.R35911	MC20.MG30.AS1.I26.R74165				MC20.MG23.AS1.I19.R25952	MC20.MG24.AS1.I27.R31018					MC20.MG37.AS1.I24.R58747				MC20.MG36.AS1.I31.R29635
						MC20.MG20.AS1.I22.R40084															MC20.MG31.AS1.I33.R35929	MC20.MG30.AS1.I26.R74297				MC20.MG23.AS1.I19.R25954	MC20.MG24.AS1.I27.R31036					MC20.MG37.AS1.I24.R58777				MC20.MG36.AS1.I31.R29810
						MC20.MG20.AS1.I22.R4022															MC20.MG31.AS1.I33.R35952	MC20.MG30.AS1.I26.R74306				MC20.MG23.AS1.I19.R26171	MC20.MG24.AS1.I27.R31068					MC20.MG37.AS1.I24.R58781				MC20.MG36.AS1.I31.R29816
						MC20.MG20.AS1.I22.R40241															MC20.MG31.AS1.I33.R36230	MC20.MG30.AS1.I26.R74389				MC20.MG23.AS1.I19.R26206	MC20.MG24.AS1.I27.R31073					MC20.MG37.AS1.I24.R5904				MC20.MG36.AS1.I31.R29862
						MC20.MG20.AS1.I22.R40300															MC20.MG31.AS1.I33.R36370	MC20.MG30.AS1.I26.R74576				MC20.MG23.AS1.I19.R26292	MC20.MG24.AS1.I27.R31168					MC20.MG37.AS1.I24.R59090				MC20.MG36.AS1.I31.R30133
						MC20.MG20.AS1.I22.R40417															MC20.MG31.AS1.I33.R3645	MC20.MG30.AS1.I26.R74989				MC20.MG23.AS1.I19.R26324	MC20.MG24.AS1.I27.R31170					MC20.MG37.AS1.I24.R5919				MC20.MG36.AS1.I31.R30180
						MC20.MG20.AS1.I22.R4051															MC20.MG31.AS1.I33.R36507	MC20.MG30.AS1.I26.R75087				MC20.MG23.AS1.I19.R26325	MC20.MG24.AS1.I27.R3120					MC20.MG37.AS1.I24.R59205				MC20.MG36.AS1.I31.R30409
						MC20.MG20.AS1.I22.R40669															MC20.MG31.AS1.I33.R36620	MC20.MG30.AS1.I26.R75172				MC20.MG23.AS1.I19.R2643	MC20.MG24.AS1.I27.R31284					MC20.MG37.AS1.I24.R59247				MC20.MG36.AS1.I31.R30779
						MC20.MG20.AS1.I22.R40680															MC20.MG31.AS1.I33.R36684	MC20.MG30.AS1.I26.R75356				MC20.MG23.AS1.I19.R26446	MC20.MG24.AS1.I27.R31296					MC20.MG37.AS1.I24.R59267				MC20.MG36.AS1.I31.R31295
						MC20.MG20.AS1.I22.R40704															MC20.MG31.AS1.I33.R36851	MC20.MG30.AS1.I26.R75493				MC20.MG23.AS1.I19.R2663	MC20.MG24.AS1.I27.R31309					MC20.MG37.AS1.I24.R59281				MC20.MG36.AS1.I31.R31657
						MC20.MG20.AS1.I22.R40779															MC20.MG31.AS1.I33.R3693	MC20.MG30.AS1.I26.R75642				MC20.MG23.AS1.I19.R26881	MC20.MG24.AS1.I27.R31518					MC20.MG37.AS1.I24.R59442				MC20.MG36.AS1.I31.R32010
						MC20.MG20.AS1.I22.R40788															MC20.MG31.AS1.I33.R37018	MC20.MG30.AS1.I26.R761				MC20.MG23.AS1.I19.R26912	MC20.MG24.AS1.I27.R31524					MC20.MG37.AS1.I24.R59469				MC20.MG36.AS1.I31.R32046
						MC20.MG20.AS1.I22.R40812															MC20.MG31.AS1.I33.R37106	MC20.MG30.AS1.I26.R76122				MC20.MG23.AS1.I19.R26999	MC20.MG24.AS1.I27.R31611					MC20.MG37.AS1.I24.R59492				MC20.MG36.AS1.I31.R32104
						MC20.MG20.AS1.I22.R40850															MC20.MG31.AS1.I33.R37113	MC20.MG30.AS1.I26.R76299				MC20.MG23.AS1.I19.R27078	MC20.MG24.AS1.I27.R31618					MC20.MG37.AS1.I24.R59672				MC20.MG36.AS1.I31.R32199
						MC20.MG20.AS1.I22.R40856															MC20.MG31.AS1.I33.R37133	MC20.MG30.AS1.I26.R7632				MC20.MG23.AS1.I19.R27373	MC20.MG24.AS1.I27.R31635					MC20.MG37.AS1.I24.R59691				MC20.MG36.AS1.I31.R32204
						MC20.MG20.AS1.I22.R40922															MC20.MG31.AS1.I33.R37173	MC20.MG30.AS1.I26.R76426				MC20.MG23.AS1.I19.R27394	MC20.MG24.AS1.I27.R3169					MC20.MG37.AS1.I24.R59794				MC20.MG36.AS1.I31.R3261
						MC20.MG20.AS1.I22.R4117															MC20.MG31.AS1.I33.R37179	MC20.MG30.AS1.I26.R76453				MC20.MG23.AS1.I19.R27560	MC20.MG24.AS1.I27.R31785					MC20.MG37.AS1.I24.R59907				MC20.MG36.AS1.I31.R32738
						MC20.MG20.AS1.I22.R41322															MC20.MG31.AS1.I33.R37224	MC20.MG30.AS1.I26.R7656				MC20.MG23.AS1.I19.R27616	MC20.MG24.AS1.I27.R31888					MC20.MG37.AS1.I24.R59980				MC20.MG36.AS1.I31.R32862
						MC20.MG20.AS1.I22.R41361															MC20.MG31.AS1.I33.R37292	MC20.MG30.AS1.I26.R76855				MC20.MG23.AS1.I19.R27624	MC20.MG24.AS1.I27.R31896					MC20.MG37.AS1.I24.R60004				MC20.MG36.AS1.I31.R33261
						MC20.MG20.AS1.I22.R41372															MC20.MG31.AS1.I33.R37297	MC20.MG30.AS1.I26.R76871				MC20.MG23.AS1.I19.R27647	MC20.MG24.AS1.I27.R31911					MC20.MG37.AS1.I24.R60119				MC20.MG36.AS1.I31.R33438
						MC20.MG20.AS1.I22.R41432															MC20.MG31.AS1.I33.R37323	MC20.MG30.AS1.I26.R76927				MC20.MG23.AS1.I19.R27789	MC20.MG24.AS1.I27.R31966					MC20.MG37.AS1.I24.R60239				MC20.MG36.AS1.I31.R33463
						MC20.MG20.AS1.I22.R41459															MC20.MG31.AS1.I33.R37329	MC20.MG30.AS1.I26.R76938				MC20.MG23.AS1.I19.R27809	MC20.MG24.AS1.I27.R31976					MC20.MG37.AS1.I24.R6027				MC20.MG36.AS1.I31.R33523
						MC20.MG20.AS1.I22.R41580															MC20.MG31.AS1.I33.R37396	MC20.MG30.AS1.I26.R76987				MC20.MG23.AS1.I19.R28032	MC20.MG24.AS1.I27.R320					MC20.MG37.AS1.I24.R6034				MC20.MG36.AS1.I31.R33587
						MC20.MG20.AS1.I22.R41659															MC20.MG31.AS1.I33.R37445	MC20.MG30.AS1.I26.R77186				MC20.MG23.AS1.I19.R28071	MC20.MG24.AS1.I27.R32054					MC20.MG37.AS1.I24.R60352				MC20.MG36.AS1.I31.R3363
						MC20.MG20.AS1.I22.R41732															MC20.MG31.AS1.I33.R37572	MC20.MG30.AS1.I26.R77224				MC20.MG23.AS1.I19.R28187	MC20.MG24.AS1.I27.R32064					MC20.MG37.AS1.I24.R60409				MC20.MG36.AS1.I31.R33641
						MC20.MG20.AS1.I22.R42073															MC20.MG31.AS1.I33.R37814	MC20.MG30.AS1.I26.R77329				MC20.MG23.AS1.I19.R28341	MC20.MG24.AS1.I27.R3208					MC20.MG37.AS1.I24.R60492				MC20.MG36.AS1.I31.R33687
						MC20.MG20.AS1.I22.R42101															MC20.MG31.AS1.I33.R37840	MC20.MG30.AS1.I26.R77428				MC20.MG23.AS1.I19.R28409	MC20.MG24.AS1.I27.R32091					MC20.MG37.AS1.I24.R6051				MC20.MG36.AS1.I31.R33708
						MC20.MG20.AS1.I22.R42153															MC20.MG31.AS1.I33.R37934	MC20.MG30.AS1.I26.R77443				MC20.MG23.AS1.I19.R2867	MC20.MG24.AS1.I27.R32143					MC20.MG37.AS1.I24.R60523				MC20.MG36.AS1.I31.R34293
						MC20.MG20.AS1.I22.R42156															MC20.MG31.AS1.I33.R38070	MC20.MG30.AS1.I26.R77465				MC20.MG23.AS1.I19.R28841	MC20.MG24.AS1.I27.R32163					MC20.MG37.AS1.I24.R60539				MC20.MG36.AS1.I31.R34299
						MC20.MG20.AS1.I22.R424															MC20.MG31.AS1.I33.R38113	MC20.MG30.AS1.I26.R7773				MC20.MG23.AS1.I19.R28916	MC20.MG24.AS1.I27.R32176					MC20.MG37.AS1.I24.R60561				MC20.MG36.AS1.I31.R34348
						MC20.MG20.AS1.I22.R42647															MC20.MG31.AS1.I33.R38370	MC20.MG30.AS1.I26.R7784				MC20.MG23.AS1.I19.R28974	MC20.MG24.AS1.I27.R32219					MC20.MG37.AS1.I24.R60686				MC20.MG36.AS1.I31.R34366
						MC20.MG20.AS1.I22.R42656															MC20.MG31.AS1.I33.R38393	MC20.MG30.AS1.I26.R78009				MC20.MG23.AS1.I19.R29048	MC20.MG24.AS1.I27.R32395					MC20.MG37.AS1.I24.R60698				MC20.MG36.AS1.I31.R34482
						MC20.MG20.AS1.I22.R42728															MC20.MG31.AS1.I33.R38481	MC20.MG30.AS1.I26.R78260				MC20.MG23.AS1.I19.R29058	MC20.MG24.AS1.I27.R32569					MC20.MG37.AS1.I24.R60750				MC20.MG36.AS1.I31.R34732
						MC20.MG20.AS1.I22.R42792															MC20.MG31.AS1.I33.R38532	MC20.MG30.AS1.I26.R78351				MC20.MG23.AS1.I19.R29211	MC20.MG24.AS1.I27.R32583					MC20.MG37.AS1.I24.R60774				MC20.MG36.AS1.I31.R34812
						MC20.MG20.AS1.I22.R42818															MC20.MG31.AS1.I33.R38990	MC20.MG30.AS1.I26.R78536				MC20.MG23.AS1.I19.R29249	MC20.MG24.AS1.I27.R3259					MC20.MG37.AS1.I24.R60826				MC20.MG36.AS1.I31.R3485
						MC20.MG20.AS1.I22.R42959															MC20.MG31.AS1.I33.R39011	MC20.MG30.AS1.I26.R78634				MC20.MG23.AS1.I19.R2927	MC20.MG24.AS1.I27.R32596					MC20.MG37.AS1.I24.R60877				MC20.MG36.AS1.I31.R35184
						MC20.MG20.AS1.I22.R42999															MC20.MG31.AS1.I33.R39386	MC20.MG30.AS1.I26.R78885				MC20.MG23.AS1.I19.R29282	MC20.MG24.AS1.I27.R3262					MC20.MG37.AS1.I24.R6101				MC20.MG36.AS1.I31.R35328
						MC20.MG20.AS1.I22.R43006															MC20.MG31.AS1.I33.R39455	MC20.MG30.AS1.I26.R78893				MC20.MG23.AS1.I19.R2956	MC20.MG24.AS1.I27.R32623					MC20.MG37.AS1.I24.R61068				MC20.MG36.AS1.I31.R35419
						MC20.MG20.AS1.I22.R43026															MC20.MG31.AS1.I33.R39489	MC20.MG30.AS1.I26.R78899				MC20.MG23.AS1.I19.R29718	MC20.MG24.AS1.I27.R32665					MC20.MG37.AS1.I24.R61145				MC20.MG36.AS1.I31.R35436
						MC20.MG20.AS1.I22.R43039															MC20.MG31.AS1.I33.R39550	MC20.MG30.AS1.I26.R79438				MC20.MG23.AS1.I19.R29854	MC20.MG24.AS1.I27.R32708					MC20.MG37.AS1.I24.R61154				MC20.MG36.AS1.I31.R35438
						MC20.MG20.AS1.I22.R43104															MC20.MG31.AS1.I33.R39554	MC20.MG30.AS1.I26.R79462				MC20.MG23.AS1.I19.R30003	MC20.MG24.AS1.I27.R32748					MC20.MG37.AS1.I24.R61182				MC20.MG36.AS1.I31.R35723
						MC20.MG20.AS1.I22.R43156															MC20.MG31.AS1.I33.R39571	MC20.MG30.AS1.I26.R79516				MC20.MG23.AS1.I19.R30187	MC20.MG24.AS1.I27.R32790					MC20.MG37.AS1.I24.R61206				MC20.MG36.AS1.I31.R35793
						MC20.MG20.AS1.I22.R43320															MC20.MG31.AS1.I33.R39732	MC20.MG30.AS1.I26.R79558				MC20.MG23.AS1.I19.R30392	MC20.MG24.AS1.I27.R32840					MC20.MG37.AS1.I24.R61214				MC20.MG36.AS1.I31.R3593
						MC20.MG20.AS1.I22.R43557															MC20.MG31.AS1.I33.R39800	MC20.MG30.AS1.I26.R79566				MC20.MG23.AS1.I19.R30449	MC20.MG24.AS1.I27.R32971					MC20.MG37.AS1.I24.R61223				MC20.MG36.AS1.I31.R35951
						MC20.MG20.AS1.I22.R43615															MC20.MG31.AS1.I33.R39905	MC20.MG30.AS1.I26.R79812				MC20.MG23.AS1.I19.R30473	MC20.MG24.AS1.I27.R32989					MC20.MG37.AS1.I24.R61288				MC20.MG36.AS1.I31.R35995
						MC20.MG20.AS1.I22.R43616															MC20.MG31.AS1.I33.R39907	MC20.MG30.AS1.I26.R80037				MC20.MG23.AS1.I19.R30615	MC20.MG24.AS1.I27.R3309					MC20.MG37.AS1.I24.R61296				MC20.MG36.AS1.I31.R36063
						MC20.MG20.AS1.I22.R43710															MC20.MG31.AS1.I33.R40041	MC20.MG30.AS1.I26.R80050				MC20.MG23.AS1.I19.R30928	MC20.MG24.AS1.I27.R33094					MC20.MG37.AS1.I24.R61367				MC20.MG36.AS1.I31.R36226
						MC20.MG20.AS1.I22.R43723															MC20.MG31.AS1.I33.R40043	MC20.MG30.AS1.I26.R80103				MC20.MG23.AS1.I19.R30991	MC20.MG24.AS1.I27.R33270					MC20.MG37.AS1.I24.R61376				MC20.MG36.AS1.I31.R36373
						MC20.MG20.AS1.I22.R43729															MC20.MG31.AS1.I33.R40156	MC20.MG30.AS1.I26.R80240				MC20.MG23.AS1.I19.R31061	MC20.MG24.AS1.I27.R33302					MC20.MG37.AS1.I24.R61411				MC20.MG36.AS1.I31.R36519
						MC20.MG20.AS1.I22.R43847															MC20.MG31.AS1.I33.R40232	MC20.MG30.AS1.I26.R8447				MC20.MG23.AS1.I19.R31088	MC20.MG24.AS1.I27.R33373					MC20.MG37.AS1.I24.R61577				MC20.MG36.AS1.I31.R36540
						MC20.MG20.AS1.I22.R44															MC20.MG31.AS1.I33.R40291	MC20.MG30.AS1.I26.R8519				MC20.MG23.AS1.I19.R31306	MC20.MG24.AS1.I27.R33475					MC20.MG37.AS1.I24.R61587				MC20.MG36.AS1.I31.R36579
						MC20.MG20.AS1.I22.R44052															MC20.MG31.AS1.I33.R40395	MC20.MG30.AS1.I26.R8545				MC20.MG23.AS1.I19.R31393	MC20.MG24.AS1.I27.R33491					MC20.MG37.AS1.I24.R61626				MC20.MG36.AS1.I31.R36831
						MC20.MG20.AS1.I22.R44059															MC20.MG31.AS1.I33.R40634	MC20.MG30.AS1.I26.R8852				MC20.MG23.AS1.I19.R31537	MC20.MG24.AS1.I27.R33541					MC20.MG37.AS1.I24.R61664				MC20.MG36.AS1.I31.R37142
						MC20.MG20.AS1.I22.R44094															MC20.MG31.AS1.I33.R40881	MC20.MG30.AS1.I26.R9202				MC20.MG23.AS1.I19.R31698	MC20.MG24.AS1.I27.R3368					MC20.MG37.AS1.I24.R61687				MC20.MG36.AS1.I31.R37376
						MC20.MG20.AS1.I22.R44127															MC20.MG31.AS1.I33.R40957	MC20.MG30.AS1.I26.R9366				MC20.MG23.AS1.I19.R31867	MC20.MG24.AS1.I27.R33703					MC20.MG37.AS1.I24.R61689				MC20.MG36.AS1.I31.R37783
						MC20.MG20.AS1.I22.R44136															MC20.MG31.AS1.I33.R41181	MC20.MG30.AS1.I26.R9410				MC20.MG23.AS1.I19.R31874	MC20.MG24.AS1.I27.R33750					MC20.MG37.AS1.I24.R61725				MC20.MG36.AS1.I31.R37794
						MC20.MG20.AS1.I22.R44202															MC20.MG31.AS1.I33.R41270	MC20.MG30.AS1.I26.R955				MC20.MG23.AS1.I19.R31943	MC20.MG24.AS1.I27.R33786					MC20.MG37.AS1.I24.R61840				MC20.MG36.AS1.I31.R38092
						MC20.MG20.AS1.I22.R44206															MC20.MG31.AS1.I33.R41392	MC20.MG30.AS1.I26.R9566				MC20.MG23.AS1.I19.R32445	MC20.MG24.AS1.I27.R33816					MC20.MG37.AS1.I24.R61874				MC20.MG36.AS1.I31.R38316
						MC20.MG20.AS1.I22.R44416															MC20.MG31.AS1.I33.R41412	MC20.MG30.AS1.I26.R9617				MC20.MG23.AS1.I19.R32575	MC20.MG24.AS1.I27.R33956					MC20.MG37.AS1.I24.R61884				MC20.MG36.AS1.I31.R38326
						MC20.MG20.AS1.I22.R44545															MC20.MG31.AS1.I33.R41475	MC20.MG30.AS1.I26.R9797				MC20.MG23.AS1.I19.R32594	MC20.MG24.AS1.I27.R34013					MC20.MG37.AS1.I24.R61928				MC20.MG36.AS1.I31.R384
						MC20.MG20.AS1.I22.R44707															MC20.MG31.AS1.I33.R41530	MC20.MG30.AS1.I26.R9884				MC20.MG23.AS1.I19.R32866	MC20.MG24.AS1.I27.R34021					MC20.MG37.AS1.I24.R61990				MC20.MG36.AS1.I31.R38402
						MC20.MG20.AS1.I22.R44723															MC20.MG31.AS1.I33.R41628	MC20.MG30.AS1.I26.R9944				MC20.MG23.AS1.I19.R3295	MC20.MG24.AS1.I27.R34066					MC20.MG37.AS1.I24.R62016				MC20.MG36.AS1.I31.R38658
						MC20.MG20.AS1.I22.R44747															MC20.MG31.AS1.I33.R41652	MC20.MG30.AS1.I4.C7				MC20.MG23.AS1.I19.R33011	MC20.MG24.AS1.I27.R34116					MC20.MG37.AS1.I24.R62104				MC20.MG36.AS1.I31.R39128
						MC20.MG20.AS1.I22.R4477															MC20.MG31.AS1.I33.R41764	MC20.MG30.AS1.I8.C3				MC20.MG23.AS1.I19.R33019	MC20.MG24.AS1.I27.R34244					MC20.MG37.AS1.I24.R62124				MC20.MG36.AS1.I31.R3944
						MC20.MG20.AS1.I22.R44792															MC20.MG31.AS1.I33.R4204					MC20.MG23.AS1.I19.R33092	MC20.MG24.AS1.I27.R34265					MC20.MG37.AS1.I24.R62196				MC20.MG36.AS1.I31.R39470
						MC20.MG20.AS1.I22.R44819															MC20.MG31.AS1.I33.R42237					MC20.MG23.AS1.I19.R33175	MC20.MG24.AS1.I27.R34341					MC20.MG37.AS1.I24.R62285				MC20.MG36.AS1.I31.R39725
						MC20.MG20.AS1.I22.R44842															MC20.MG31.AS1.I33.R42256					MC20.MG23.AS1.I19.R33251	MC20.MG24.AS1.I27.R34356					MC20.MG37.AS1.I24.R62296				MC20.MG36.AS1.I31.R39775
						MC20.MG20.AS1.I22.R44888															MC20.MG31.AS1.I33.R42302					MC20.MG23.AS1.I19.R33974	MC20.MG24.AS1.I27.R34403					MC20.MG37.AS1.I24.R62312				MC20.MG36.AS1.I31.R39919
						MC20.MG20.AS1.I22.R44992															MC20.MG31.AS1.I33.R42319					MC20.MG23.AS1.I19.R33979	MC20.MG24.AS1.I27.R34411					MC20.MG37.AS1.I24.R62388				MC20.MG36.AS1.I31.R40045
						MC20.MG20.AS1.I22.R45169															MC20.MG31.AS1.I33.R42623					MC20.MG23.AS1.I19.R34056	MC20.MG24.AS1.I27.R34426					MC20.MG37.AS1.I24.R62448				MC20.MG36.AS1.I31.R40315
						MC20.MG20.AS1.I22.R45181															MC20.MG31.AS1.I33.R42717					MC20.MG23.AS1.I19.R34319	MC20.MG24.AS1.I27.R34472					MC20.MG37.AS1.I24.R6248				MC20.MG36.AS1.I31.R40370
						MC20.MG20.AS1.I22.R45200															MC20.MG31.AS1.I33.R42844					MC20.MG23.AS1.I19.R34386	MC20.MG24.AS1.I27.R3449					MC20.MG37.AS1.I24.R62483				MC20.MG36.AS1.I31.R40385
						MC20.MG20.AS1.I22.R45264															MC20.MG31.AS1.I33.R42847					MC20.MG23.AS1.I19.R34436	MC20.MG24.AS1.I27.R34528					MC20.MG37.AS1.I24.R62640				MC20.MG36.AS1.I31.R4046
						MC20.MG20.AS1.I22.R4560															MC20.MG31.AS1.I33.R42898					MC20.MG23.AS1.I19.R34512	MC20.MG24.AS1.I27.R34541					MC20.MG37.AS1.I24.R62676				MC20.MG36.AS1.I31.R4064
						MC20.MG20.AS1.I22.R45623															MC20.MG31.AS1.I33.R43108					MC20.MG23.AS1.I19.R34535	MC20.MG24.AS1.I27.R34606					MC20.MG37.AS1.I24.R62680				MC20.MG36.AS1.I31.R40847
						MC20.MG20.AS1.I22.R4570															MC20.MG31.AS1.I33.R4335					MC20.MG23.AS1.I19.R34750	MC20.MG24.AS1.I27.R34656					MC20.MG37.AS1.I24.R627				MC20.MG36.AS1.I31.R40861
						MC20.MG20.AS1.I22.R45737															MC20.MG31.AS1.I33.R43394					MC20.MG23.AS1.I19.R34846	MC20.MG24.AS1.I27.R34665					MC20.MG37.AS1.I24.R62700				MC20.MG36.AS1.I31.R4118
						MC20.MG20.AS1.I22.R45817															MC20.MG31.AS1.I33.R43496					MC20.MG23.AS1.I19.R34941	MC20.MG24.AS1.I27.R3470					MC20.MG37.AS1.I24.R628				MC20.MG36.AS1.I31.R41199
						MC20.MG20.AS1.I22.R45898															MC20.MG31.AS1.I33.R43519					MC20.MG23.AS1.I19.R34942	MC20.MG24.AS1.I27.R34704					MC20.MG37.AS1.I24.R62860				MC20.MG36.AS1.I31.R41327
						MC20.MG20.AS1.I22.R4593															MC20.MG31.AS1.I33.R43710					MC20.MG23.AS1.I19.R35003	MC20.MG24.AS1.I27.R3473					MC20.MG37.AS1.I24.R62926				MC20.MG36.AS1.I31.R41697
						MC20.MG20.AS1.I22.R45933															MC20.MG31.AS1.I33.R43775					MC20.MG23.AS1.I19.R35004	MC20.MG24.AS1.I27.R34737					MC20.MG37.AS1.I24.R62958				MC20.MG36.AS1.I31.R4170
						MC20.MG20.AS1.I22.R46011															MC20.MG31.AS1.I33.R44177					MC20.MG23.AS1.I19.R35169	MC20.MG24.AS1.I27.R34809					MC20.MG37.AS1.I24.R62986				MC20.MG36.AS1.I31.R41758
						MC20.MG20.AS1.I22.R46040															MC20.MG31.AS1.I33.R44268					MC20.MG23.AS1.I19.R35204	MC20.MG24.AS1.I27.R34899					MC20.MG37.AS1.I24.R63001				MC20.MG36.AS1.I31.R41812
						MC20.MG20.AS1.I22.R46214															MC20.MG31.AS1.I33.R44314					MC20.MG23.AS1.I19.R35331	MC20.MG24.AS1.I27.R351					MC20.MG37.AS1.I24.R63021				MC20.MG36.AS1.I31.R41855
						MC20.MG20.AS1.I22.R4630															MC20.MG31.AS1.I33.R44523					MC20.MG23.AS1.I19.R35539	MC20.MG24.AS1.I27.R35134					MC20.MG37.AS1.I24.R63028				MC20.MG36.AS1.I31.R42073
						MC20.MG20.AS1.I22.R46379															MC20.MG31.AS1.I33.R44561					MC20.MG23.AS1.I19.R35587	MC20.MG24.AS1.I27.R35157					MC20.MG37.AS1.I24.R63050				MC20.MG36.AS1.I31.R42201
						MC20.MG20.AS1.I22.R46491															MC20.MG31.AS1.I33.R44693					MC20.MG23.AS1.I19.R3572	MC20.MG24.AS1.I27.R35181					MC20.MG37.AS1.I24.R63084				MC20.MG36.AS1.I31.R42652
						MC20.MG20.AS1.I22.R46564															MC20.MG31.AS1.I33.R44810					MC20.MG23.AS1.I19.R35743	MC20.MG24.AS1.I27.R35214					MC20.MG37.AS1.I24.R63091				MC20.MG36.AS1.I31.R42672
						MC20.MG20.AS1.I22.R46680															MC20.MG31.AS1.I33.R44858					MC20.MG23.AS1.I19.R35748	MC20.MG24.AS1.I27.R35233					MC20.MG37.AS1.I24.R63364				MC20.MG36.AS1.I31.R42764
						MC20.MG20.AS1.I22.R46711															MC20.MG31.AS1.I33.R45033					MC20.MG23.AS1.I19.R36209	MC20.MG24.AS1.I27.R35325					MC20.MG37.AS1.I24.R63382				MC20.MG36.AS1.I31.R43001
						MC20.MG20.AS1.I22.R46719															MC20.MG31.AS1.I33.R45042					MC20.MG23.AS1.I19.R36300	MC20.MG24.AS1.I27.R3535					MC20.MG37.AS1.I24.R63497				MC20.MG36.AS1.I31.R4324
						MC20.MG20.AS1.I22.R46725															MC20.MG31.AS1.I33.R45229					MC20.MG23.AS1.I19.R36354	MC20.MG24.AS1.I27.R35394					MC20.MG37.AS1.I24.R63515				MC20.MG36.AS1.I31.R43448
						MC20.MG20.AS1.I22.R46806															MC20.MG31.AS1.I33.R45292					MC20.MG23.AS1.I19.R36396	MC20.MG24.AS1.I27.R35413					MC20.MG37.AS1.I24.R6356				MC20.MG36.AS1.I31.R43458
						MC20.MG20.AS1.I22.R4700															MC20.MG31.AS1.I33.R45295					MC20.MG23.AS1.I19.R36512	MC20.MG24.AS1.I27.R35454					MC20.MG37.AS1.I24.R63666				MC20.MG36.AS1.I31.R44038
						MC20.MG20.AS1.I22.R47038															MC20.MG31.AS1.I33.R45712					MC20.MG23.AS1.I19.R36740	MC20.MG24.AS1.I27.R35455					MC20.MG37.AS1.I24.R63920				MC20.MG36.AS1.I31.R44049
						MC20.MG20.AS1.I22.R47159															MC20.MG31.AS1.I33.R45913					MC20.MG23.AS1.I19.R3705	MC20.MG24.AS1.I27.R35479					MC20.MG37.AS1.I24.R63946				MC20.MG36.AS1.I31.R44190
						MC20.MG20.AS1.I22.R47218															MC20.MG31.AS1.I33.R45922					MC20.MG23.AS1.I19.R37162	MC20.MG24.AS1.I27.R35562					MC20.MG37.AS1.I24.R640				MC20.MG36.AS1.I31.R44331
						MC20.MG20.AS1.I22.R47250															MC20.MG31.AS1.I33.R46197					MC20.MG23.AS1.I19.R37237	MC20.MG24.AS1.I27.R35665					MC20.MG37.AS1.I24.R6409				MC20.MG36.AS1.I31.R44399
						MC20.MG20.AS1.I22.R47335															MC20.MG31.AS1.I33.R46239					MC20.MG23.AS1.I19.R37330	MC20.MG24.AS1.I27.R35671					MC20.MG37.AS1.I24.R64143				MC20.MG36.AS1.I31.R44604
						MC20.MG20.AS1.I22.R47395															MC20.MG31.AS1.I33.R46632					MC20.MG23.AS1.I19.R37461	MC20.MG24.AS1.I27.R35722					MC20.MG37.AS1.I24.R64231				MC20.MG36.AS1.I31.R44615
						MC20.MG20.AS1.I22.R47514															MC20.MG31.AS1.I33.R46683					MC20.MG23.AS1.I19.R37905	MC20.MG24.AS1.I27.R35725					MC20.MG37.AS1.I24.R64286				MC20.MG36.AS1.I31.R44653
						MC20.MG20.AS1.I22.R47563															MC20.MG31.AS1.I33.R46783					MC20.MG23.AS1.I19.R37936	MC20.MG24.AS1.I27.R35747					MC20.MG37.AS1.I24.R64315				MC20.MG36.AS1.I31.R44656
						MC20.MG20.AS1.I22.R47578															MC20.MG31.AS1.I33.R46831					MC20.MG23.AS1.I19.R37954	MC20.MG24.AS1.I27.R35840					MC20.MG37.AS1.I24.R64424				MC20.MG36.AS1.I31.R44741
						MC20.MG20.AS1.I22.R47829															MC20.MG31.AS1.I33.R46856					MC20.MG23.AS1.I19.R37969	MC20.MG24.AS1.I27.R35885					MC20.MG37.AS1.I24.R64435				MC20.MG36.AS1.I31.R44881
						MC20.MG20.AS1.I22.R47861															MC20.MG31.AS1.I33.R46864					MC20.MG23.AS1.I19.R38168	MC20.MG24.AS1.I27.R35944					MC20.MG37.AS1.I24.R64458				MC20.MG36.AS1.I31.R44885
						MC20.MG20.AS1.I22.R4790															MC20.MG31.AS1.I33.R4692					MC20.MG23.AS1.I19.R38279	MC20.MG24.AS1.I27.R3596					MC20.MG37.AS1.I24.R64466				MC20.MG36.AS1.I31.R44986
						MC20.MG20.AS1.I22.R47942															MC20.MG31.AS1.I33.R47081					MC20.MG23.AS1.I19.R38565	MC20.MG24.AS1.I27.R35965					MC20.MG37.AS1.I24.R6454				MC20.MG36.AS1.I31.R45026
						MC20.MG20.AS1.I22.R47996															MC20.MG31.AS1.I33.R47196					MC20.MG23.AS1.I19.R38616	MC20.MG24.AS1.I27.R36257					MC20.MG37.AS1.I24.R64616				MC20.MG36.AS1.I31.R45185
						MC20.MG20.AS1.I22.R47998															MC20.MG31.AS1.I33.R47278					MC20.MG23.AS1.I19.R38697	MC20.MG24.AS1.I27.R36316					MC20.MG37.AS1.I24.R64798				MC20.MG36.AS1.I31.R4526
						MC20.MG20.AS1.I22.R48115															MC20.MG31.AS1.I33.R47392					MC20.MG23.AS1.I19.R38930	MC20.MG24.AS1.I27.R36337					MC20.MG37.AS1.I24.R6481				MC20.MG36.AS1.I31.R45548
						MC20.MG20.AS1.I22.R48117															MC20.MG31.AS1.I33.R47483					MC20.MG23.AS1.I19.R390	MC20.MG24.AS1.I27.R3653					MC20.MG37.AS1.I24.R64837				MC20.MG36.AS1.I31.R4556
						MC20.MG20.AS1.I22.R48268															MC20.MG31.AS1.I33.R47546					MC20.MG23.AS1.I19.R39055	MC20.MG24.AS1.I27.R36574					MC20.MG37.AS1.I24.R6501				MC20.MG36.AS1.I31.R46092
						MC20.MG20.AS1.I22.R48424															MC20.MG31.AS1.I33.R4775					MC20.MG23.AS1.I19.R39105	MC20.MG24.AS1.I27.R36582					MC20.MG37.AS1.I24.R6504				MC20.MG36.AS1.I31.R46296
						MC20.MG20.AS1.I22.R48437															MC20.MG31.AS1.I33.R47773					MC20.MG23.AS1.I19.R39330	MC20.MG24.AS1.I27.R3666					MC20.MG37.AS1.I24.R6578				MC20.MG36.AS1.I31.R46378
						MC20.MG20.AS1.I22.R48730															MC20.MG31.AS1.I33.R47778					MC20.MG23.AS1.I19.R39391	MC20.MG24.AS1.I27.R36663					MC20.MG37.AS1.I24.R6757				MC20.MG36.AS1.I31.R46476
						MC20.MG20.AS1.I22.R48801															MC20.MG31.AS1.I33.R47818					MC20.MG23.AS1.I19.R39432	MC20.MG24.AS1.I27.R36751					MC20.MG37.AS1.I24.R6761				MC20.MG36.AS1.I31.R46524
						MC20.MG20.AS1.I22.R48808															MC20.MG31.AS1.I33.R47861					MC20.MG23.AS1.I19.R39444	MC20.MG24.AS1.I27.R36800					MC20.MG37.AS1.I24.R677				MC20.MG36.AS1.I31.R46954
						MC20.MG20.AS1.I22.R48870															MC20.MG31.AS1.I33.R47941					MC20.MG23.AS1.I19.R39474	MC20.MG24.AS1.I27.R36890					MC20.MG37.AS1.I24.R6900				MC20.MG36.AS1.I31.R47147
						MC20.MG20.AS1.I22.R48916															MC20.MG31.AS1.I33.R48038					MC20.MG23.AS1.I19.R39521	MC20.MG24.AS1.I27.R3695					MC20.MG37.AS1.I24.R6926				MC20.MG36.AS1.I31.R47338
						MC20.MG20.AS1.I22.R48969															MC20.MG31.AS1.I33.R48125					MC20.MG23.AS1.I19.R3979	MC20.MG24.AS1.I27.R36970					MC20.MG37.AS1.I24.R6950				MC20.MG36.AS1.I31.R47784
						MC20.MG20.AS1.I22.R49168															MC20.MG31.AS1.I33.R48254					MC20.MG23.AS1.I19.R4006	MC20.MG24.AS1.I27.R37030					MC20.MG37.AS1.I24.R7076				MC20.MG36.AS1.I31.R47846
						MC20.MG20.AS1.I22.R4937															MC20.MG31.AS1.I33.R48339					MC20.MG23.AS1.I19.R40209	MC20.MG24.AS1.I27.R37120					MC20.MG37.AS1.I24.R7104				MC20.MG36.AS1.I31.R47856
						MC20.MG20.AS1.I22.R49542															MC20.MG31.AS1.I33.R48793					MC20.MG23.AS1.I19.R40414	MC20.MG24.AS1.I27.R37310					MC20.MG37.AS1.I24.R7138				MC20.MG36.AS1.I31.R47904
						MC20.MG20.AS1.I22.R49567															MC20.MG31.AS1.I33.R48802					MC20.MG23.AS1.I19.R40430	MC20.MG24.AS1.I27.R37360					MC20.MG37.AS1.I24.R7192				MC20.MG36.AS1.I31.R48163
						MC20.MG20.AS1.I22.R49678															MC20.MG31.AS1.I33.R48826					MC20.MG23.AS1.I19.R40486	MC20.MG24.AS1.I27.R37498					MC20.MG37.AS1.I24.R720				MC20.MG36.AS1.I31.R48579
						MC20.MG20.AS1.I22.R49696															MC20.MG31.AS1.I33.R48949					MC20.MG23.AS1.I19.R4053	MC20.MG24.AS1.I27.R37503					MC20.MG37.AS1.I24.R7222				MC20.MG36.AS1.I31.R49340
						MC20.MG20.AS1.I22.R49981															MC20.MG31.AS1.I33.R48997					MC20.MG23.AS1.I19.R40559	MC20.MG24.AS1.I27.R3751					MC20.MG37.AS1.I24.R7585				MC20.MG36.AS1.I31.R49361
						MC20.MG20.AS1.I22.R50041															MC20.MG31.AS1.I33.R49087					MC20.MG23.AS1.I19.R40863	MC20.MG24.AS1.I27.R37518					MC20.MG37.AS1.I24.R7596				MC20.MG36.AS1.I31.R49712
						MC20.MG20.AS1.I22.R50126															MC20.MG31.AS1.I33.R49216					MC20.MG23.AS1.I19.R40968	MC20.MG24.AS1.I27.R37591					MC20.MG37.AS1.I24.R762				MC20.MG36.AS1.I31.R49757
						MC20.MG20.AS1.I22.R50439															MC20.MG31.AS1.I33.R49312					MC20.MG23.AS1.I19.R41081	MC20.MG24.AS1.I27.R37643					MC20.MG37.AS1.I24.R766				MC20.MG36.AS1.I31.R49977
						MC20.MG20.AS1.I22.R50489															MC20.MG31.AS1.I33.R49726					MC20.MG23.AS1.I19.R41637	MC20.MG24.AS1.I27.R37684					MC20.MG37.AS1.I24.R7677				MC20.MG36.AS1.I31.R50379
						MC20.MG20.AS1.I22.R50586															MC20.MG31.AS1.I33.R49787					MC20.MG23.AS1.I19.R41756	MC20.MG24.AS1.I27.R37710					MC20.MG37.AS1.I24.R7759				MC20.MG36.AS1.I31.R50482
						MC20.MG20.AS1.I22.R50813															MC20.MG31.AS1.I33.R49919					MC20.MG23.AS1.I19.R41757	MC20.MG24.AS1.I27.R37784					MC20.MG37.AS1.I24.R7846				MC20.MG36.AS1.I31.R51033
						MC20.MG20.AS1.I22.R50817															MC20.MG31.AS1.I33.R50066					MC20.MG23.AS1.I19.R41890	MC20.MG24.AS1.I27.R37792					MC20.MG37.AS1.I24.R8				MC20.MG36.AS1.I31.R51041
						MC20.MG20.AS1.I22.R5109															MC20.MG31.AS1.I33.R50097					MC20.MG23.AS1.I19.R41970	MC20.MG24.AS1.I27.R37866					MC20.MG37.AS1.I24.R8124				MC20.MG36.AS1.I31.R51203
						MC20.MG20.AS1.I22.R51122															MC20.MG31.AS1.I33.R50117					MC20.MG23.AS1.I19.R4198	MC20.MG24.AS1.I27.R37957					MC20.MG37.AS1.I24.R8128				MC20.MG36.AS1.I31.R51584
						MC20.MG20.AS1.I22.R51228															MC20.MG31.AS1.I33.R50134					MC20.MG23.AS1.I19.R42084	MC20.MG24.AS1.I27.R3799					MC20.MG37.AS1.I24.R814				MC20.MG36.AS1.I31.R51643
						MC20.MG20.AS1.I22.R51240															MC20.MG31.AS1.I33.R50278					MC20.MG23.AS1.I19.R42099	MC20.MG24.AS1.I27.R38083					MC20.MG37.AS1.I24.R8317				MC20.MG36.AS1.I31.R5182
						MC20.MG20.AS1.I22.R51311															MC20.MG31.AS1.I33.R50551					MC20.MG23.AS1.I19.R42245	MC20.MG24.AS1.I27.R38159					MC20.MG37.AS1.I24.R8327				MC20.MG36.AS1.I31.R52321
						MC20.MG20.AS1.I22.R51323															MC20.MG31.AS1.I33.R50571					MC20.MG23.AS1.I19.R42260	MC20.MG24.AS1.I27.R38255					MC20.MG37.AS1.I24.R8406				MC20.MG36.AS1.I31.R52505
						MC20.MG20.AS1.I22.R51360															MC20.MG31.AS1.I33.R50589					MC20.MG23.AS1.I19.R42432	MC20.MG24.AS1.I27.R38256					MC20.MG37.AS1.I24.R8424				MC20.MG36.AS1.I31.R5258
						MC20.MG20.AS1.I22.R51381															MC20.MG31.AS1.I33.R5063					MC20.MG23.AS1.I19.R42611	MC20.MG24.AS1.I27.R3840					MC20.MG37.AS1.I24.R8560				MC20.MG36.AS1.I31.R52739
						MC20.MG20.AS1.I22.R51395															MC20.MG31.AS1.I33.R50738					MC20.MG23.AS1.I19.R42719	MC20.MG24.AS1.I27.R38485					MC20.MG37.AS1.I24.R862				MC20.MG36.AS1.I31.R52841
						MC20.MG20.AS1.I22.R51530															MC20.MG31.AS1.I33.R50763					MC20.MG23.AS1.I19.R42823	MC20.MG24.AS1.I27.R38528					MC20.MG37.AS1.I24.R8663				MC20.MG36.AS1.I31.R53020
						MC20.MG20.AS1.I22.R5154															MC20.MG31.AS1.I33.R50838					MC20.MG23.AS1.I19.R42901	MC20.MG24.AS1.I27.R38566					MC20.MG37.AS1.I24.R9068				MC20.MG36.AS1.I31.R53083
						MC20.MG20.AS1.I22.R51614															MC20.MG31.AS1.I33.R50878					MC20.MG23.AS1.I19.R43022	MC20.MG24.AS1.I27.R38696					MC20.MG37.AS1.I24.R9094				MC20.MG36.AS1.I31.R53224
						MC20.MG20.AS1.I22.R5167															MC20.MG31.AS1.I33.R50889					MC20.MG23.AS1.I19.R43215	MC20.MG24.AS1.I27.R38700					MC20.MG37.AS1.I24.R9148				MC20.MG36.AS1.I31.R53473
						MC20.MG20.AS1.I22.R5185															MC20.MG31.AS1.I33.R50898					MC20.MG23.AS1.I19.R43219	MC20.MG24.AS1.I27.R38746					MC20.MG37.AS1.I24.R9151				MC20.MG36.AS1.I31.R54083
						MC20.MG20.AS1.I22.R51934															MC20.MG31.AS1.I33.R50935					MC20.MG23.AS1.I19.R43245	MC20.MG24.AS1.I27.R38963					MC20.MG37.AS1.I24.R9201				MC20.MG36.AS1.I31.R54411
						MC20.MG20.AS1.I22.R51957															MC20.MG31.AS1.I33.R51083					MC20.MG23.AS1.I19.R4332	MC20.MG24.AS1.I27.R38977					MC20.MG37.AS1.I24.R9210				MC20.MG36.AS1.I31.R54980
						MC20.MG20.AS1.I22.R52059															MC20.MG31.AS1.I33.R51192					MC20.MG23.AS1.I19.R4345	MC20.MG24.AS1.I27.R39075					MC20.MG37.AS1.I24.R9233				MC20.MG36.AS1.I31.R55076
						MC20.MG20.AS1.I22.R5207															MC20.MG31.AS1.I33.R51297					MC20.MG23.AS1.I19.R43568	MC20.MG24.AS1.I27.R39177					MC20.MG37.AS1.I24.R9263				MC20.MG36.AS1.I31.R55396
						MC20.MG20.AS1.I22.R52126															MC20.MG31.AS1.I33.R51436					MC20.MG23.AS1.I19.R43666	MC20.MG24.AS1.I27.R39323					MC20.MG37.AS1.I24.R929				MC20.MG36.AS1.I31.R5565
						MC20.MG20.AS1.I22.R52183															MC20.MG31.AS1.I33.R51442					MC20.MG23.AS1.I19.R43696	MC20.MG24.AS1.I27.R39333					MC20.MG37.AS1.I24.R935				MC20.MG36.AS1.I31.R55731
						MC20.MG20.AS1.I22.R52192															MC20.MG31.AS1.I33.R515					MC20.MG23.AS1.I19.R44117	MC20.MG24.AS1.I27.R39372					MC20.MG37.AS1.I24.R9351				MC20.MG36.AS1.I31.R56011
						MC20.MG20.AS1.I22.R52217															MC20.MG31.AS1.I33.R51645					MC20.MG23.AS1.I19.R4412	MC20.MG24.AS1.I27.R39390					MC20.MG37.AS1.I24.R9574				MC20.MG36.AS1.I31.R56093
						MC20.MG20.AS1.I22.R52237															MC20.MG31.AS1.I33.R51707					MC20.MG23.AS1.I19.R44358	MC20.MG24.AS1.I27.R39432					MC20.MG37.AS1.I24.R959				MC20.MG36.AS1.I31.R56098
						MC20.MG20.AS1.I22.R52241															MC20.MG31.AS1.I33.R5185					MC20.MG23.AS1.I19.R44517	MC20.MG24.AS1.I27.R39558					MC20.MG37.AS1.I24.R9612				MC20.MG36.AS1.I31.R56233
						MC20.MG20.AS1.I22.R52252															MC20.MG31.AS1.I33.R51858					MC20.MG23.AS1.I19.R45217	MC20.MG24.AS1.I27.R39570					MC20.MG37.AS1.I24.R969				MC20.MG36.AS1.I31.R56285
						MC20.MG20.AS1.I22.R52284															MC20.MG31.AS1.I33.R51986					MC20.MG23.AS1.I19.R45223	MC20.MG24.AS1.I27.R39585					MC20.MG37.AS1.I24.R9869				MC20.MG36.AS1.I31.R56564
						MC20.MG20.AS1.I22.R52439															MC20.MG31.AS1.I33.R52025					MC20.MG23.AS1.I19.R45309	MC20.MG24.AS1.I27.R39591					MC20.MG37.AS1.I4.C11				MC20.MG36.AS1.I31.R57393
						MC20.MG20.AS1.I22.R52444															MC20.MG31.AS1.I33.R52075					MC20.MG23.AS1.I19.R45347	MC20.MG24.AS1.I27.R39700					MC20.MG37.AS1.I8.C2				MC20.MG36.AS1.I31.R57953
						MC20.MG20.AS1.I22.R52551															MC20.MG31.AS1.I33.R521					MC20.MG23.AS1.I19.R454	MC20.MG24.AS1.I27.R39701					OB8.contigs.fa.lenient.fna				MC20.MG36.AS1.I31.R57955
						MC20.MG20.AS1.I22.R52656															MC20.MG31.AS1.I33.R52108					MC20.MG23.AS1.I19.R45426	MC20.MG24.AS1.I27.R398									MC20.MG36.AS1.I31.R58005
						MC20.MG20.AS1.I22.R52670															MC20.MG31.AS1.I33.R52342					MC20.MG23.AS1.I19.R45444	MC20.MG24.AS1.I27.R39900									MC20.MG36.AS1.I31.R58047
						MC20.MG20.AS1.I22.R52695															MC20.MG31.AS1.I33.R52454					MC20.MG23.AS1.I19.R45534	MC20.MG24.AS1.I27.R40078									MC20.MG36.AS1.I31.R58133
						MC20.MG20.AS1.I22.R52760															MC20.MG31.AS1.I33.R52482					MC20.MG23.AS1.I19.R45629	MC20.MG24.AS1.I27.R40147									MC20.MG36.AS1.I31.R5827
						MC20.MG20.AS1.I22.R52897															MC20.MG31.AS1.I33.R52525					MC20.MG23.AS1.I19.R45809	MC20.MG24.AS1.I27.R40248									MC20.MG36.AS1.I31.R58289
						MC20.MG20.AS1.I22.R52953															MC20.MG31.AS1.I33.R52738					MC20.MG23.AS1.I19.R46107	MC20.MG24.AS1.I27.R4034									MC20.MG36.AS1.I31.R58325
						MC20.MG20.AS1.I22.R52982															MC20.MG31.AS1.I33.R52752					MC20.MG23.AS1.I19.R46118	MC20.MG24.AS1.I27.R4035									MC20.MG36.AS1.I31.R58350
						MC20.MG20.AS1.I22.R53024															MC20.MG31.AS1.I33.R52766					MC20.MG23.AS1.I19.R46246	MC20.MG24.AS1.I27.R40384									MC20.MG36.AS1.I31.R58420
						MC20.MG20.AS1.I22.R53026															MC20.MG31.AS1.I33.R52991					MC20.MG23.AS1.I19.R46307	MC20.MG24.AS1.I27.R4045									MC20.MG36.AS1.I31.R58426
						MC20.MG20.AS1.I22.R53046															MC20.MG31.AS1.I33.R53198					MC20.MG23.AS1.I19.R46378	MC20.MG24.AS1.I27.R40494									MC20.MG36.AS1.I31.R58583
						MC20.MG20.AS1.I22.R53123															MC20.MG31.AS1.I33.R5322					MC20.MG23.AS1.I19.R46380	MC20.MG24.AS1.I27.R40523									MC20.MG36.AS1.I31.R58831
						MC20.MG20.AS1.I22.R53225															MC20.MG31.AS1.I33.R53326					MC20.MG23.AS1.I19.R46648	MC20.MG24.AS1.I27.R40556									MC20.MG36.AS1.I31.R58890
						MC20.MG20.AS1.I22.R53277															MC20.MG31.AS1.I33.R53340					MC20.MG23.AS1.I19.R46813	MC20.MG24.AS1.I27.R40558									MC20.MG36.AS1.I31.R58929
						MC20.MG20.AS1.I22.R53308															MC20.MG31.AS1.I33.R53506					MC20.MG23.AS1.I19.R46879	MC20.MG24.AS1.I27.R40608									MC20.MG36.AS1.I31.R58967
						MC20.MG20.AS1.I22.R5332															MC20.MG31.AS1.I33.R53579					MC20.MG23.AS1.I19.R46952	MC20.MG24.AS1.I27.R40619									MC20.MG36.AS1.I31.R59045
						MC20.MG20.AS1.I22.R53488															MC20.MG31.AS1.I33.R5367					MC20.MG23.AS1.I19.R47127	MC20.MG24.AS1.I27.R40647									MC20.MG36.AS1.I31.R59067
						MC20.MG20.AS1.I22.R53597															MC20.MG31.AS1.I33.R53822					MC20.MG23.AS1.I19.R47187	MC20.MG24.AS1.I27.R40667									MC20.MG36.AS1.I31.R59134
						MC20.MG20.AS1.I22.R53644															MC20.MG31.AS1.I33.R54095					MC20.MG23.AS1.I19.R47373	MC20.MG24.AS1.I27.R40825									MC20.MG36.AS1.I31.R59196
						MC20.MG20.AS1.I22.R5366															MC20.MG31.AS1.I33.R54373					MC20.MG23.AS1.I19.R47634	MC20.MG24.AS1.I27.R41008									MC20.MG36.AS1.I31.R5920
						MC20.MG20.AS1.I22.R53707															MC20.MG31.AS1.I33.R54423					MC20.MG23.AS1.I19.R47878	MC20.MG24.AS1.I27.R41039									MC20.MG36.AS1.I31.R59355
						MC20.MG20.AS1.I22.R53746															MC20.MG31.AS1.I33.R54431					MC20.MG23.AS1.I19.R47951	MC20.MG24.AS1.I27.R41244									MC20.MG36.AS1.I31.R59427
						MC20.MG20.AS1.I22.R53776															MC20.MG31.AS1.I33.R5478					MC20.MG23.AS1.I19.R48007	MC20.MG24.AS1.I27.R41261									MC20.MG36.AS1.I31.R59451
						MC20.MG20.AS1.I22.R53818															MC20.MG31.AS1.I33.R54854					MC20.MG23.AS1.I19.R4809	MC20.MG24.AS1.I27.R41273									MC20.MG36.AS1.I31.R59698
						MC20.MG20.AS1.I22.R53837															MC20.MG31.AS1.I33.R55381					MC20.MG23.AS1.I19.R48106	MC20.MG24.AS1.I27.R41348									MC20.MG36.AS1.I31.R5971
						MC20.MG20.AS1.I22.R53849															MC20.MG31.AS1.I33.R55481					MC20.MG23.AS1.I19.R48146	MC20.MG24.AS1.I27.R41573									MC20.MG36.AS1.I31.R59883
						MC20.MG20.AS1.I22.R53913															MC20.MG31.AS1.I33.R55590					MC20.MG23.AS1.I19.R4827	MC20.MG24.AS1.I27.R41620									MC20.MG36.AS1.I31.R59983
						MC20.MG20.AS1.I22.R54004															MC20.MG31.AS1.I33.R55731					MC20.MG23.AS1.I19.R48330	MC20.MG24.AS1.I27.R4174									MC20.MG36.AS1.I31.R60014
						MC20.MG20.AS1.I22.R54028															MC20.MG31.AS1.I33.R55790					MC20.MG23.AS1.I19.R48391	MC20.MG24.AS1.I27.R41909									MC20.MG36.AS1.I31.R60021
						MC20.MG20.AS1.I22.R54055															MC20.MG31.AS1.I33.R55866					MC20.MG23.AS1.I19.R48582	MC20.MG24.AS1.I27.R4197									MC20.MG36.AS1.I31.R60213
						MC20.MG20.AS1.I22.R54093															MC20.MG31.AS1.I33.R55930					MC20.MG23.AS1.I19.R48632	MC20.MG24.AS1.I27.R42034									MC20.MG36.AS1.I31.R60273
						MC20.MG20.AS1.I22.R54150															MC20.MG31.AS1.I33.R55965					MC20.MG23.AS1.I19.R48709	MC20.MG24.AS1.I27.R42053									MC20.MG36.AS1.I31.R60417
						MC20.MG20.AS1.I22.R54199															MC20.MG31.AS1.I33.R56007					MC20.MG23.AS1.I19.R48965	MC20.MG24.AS1.I27.R42096									MC20.MG36.AS1.I31.R60424
						MC20.MG20.AS1.I22.R54225															MC20.MG31.AS1.I33.R56271					MC20.MG23.AS1.I19.R4900	MC20.MG24.AS1.I27.R4218									MC20.MG36.AS1.I31.R60518
						MC20.MG20.AS1.I22.R54240															MC20.MG31.AS1.I33.R56304					MC20.MG23.AS1.I19.R49074	MC20.MG24.AS1.I27.R42185									MC20.MG36.AS1.I31.R608
						MC20.MG20.AS1.I22.R54266															MC20.MG31.AS1.I33.R56398					MC20.MG23.AS1.I19.R49136	MC20.MG24.AS1.I27.R42242									MC20.MG36.AS1.I31.R60857
						MC20.MG20.AS1.I22.R54304															MC20.MG31.AS1.I33.R56433					MC20.MG23.AS1.I19.R49188	MC20.MG24.AS1.I27.R42308									MC20.MG36.AS1.I31.R60954
						MC20.MG20.AS1.I22.R54404															MC20.MG31.AS1.I33.R56818					MC20.MG23.AS1.I19.R49220	MC20.MG24.AS1.I27.R42438									MC20.MG36.AS1.I31.R61056
						MC20.MG20.AS1.I22.R54539															MC20.MG31.AS1.I33.R56887					MC20.MG23.AS1.I19.R49222	MC20.MG24.AS1.I27.R42615									MC20.MG36.AS1.I31.R61178
						MC20.MG20.AS1.I22.R5454															MC20.MG31.AS1.I33.R56935					MC20.MG23.AS1.I19.R49257	MC20.MG24.AS1.I27.R42664									MC20.MG36.AS1.I31.R6134
						MC20.MG20.AS1.I22.R5462															MC20.MG31.AS1.I33.R57090					MC20.MG23.AS1.I19.R49385	MC20.MG24.AS1.I27.R42681									MC20.MG36.AS1.I31.R61466
						MC20.MG20.AS1.I22.R54707															MC20.MG31.AS1.I33.R57219					MC20.MG23.AS1.I19.R49430	MC20.MG24.AS1.I27.R42697									MC20.MG36.AS1.I31.R61851
						MC20.MG20.AS1.I22.R54716															MC20.MG31.AS1.I33.R57241					MC20.MG23.AS1.I19.R49447	MC20.MG24.AS1.I27.R42738									MC20.MG36.AS1.I31.R61910
						MC20.MG20.AS1.I22.R54734															MC20.MG31.AS1.I33.R57313					MC20.MG23.AS1.I19.R49614	MC20.MG24.AS1.I27.R4274									MC20.MG36.AS1.I31.R6201
						MC20.MG20.AS1.I22.R54735															MC20.MG31.AS1.I33.R57406					MC20.MG23.AS1.I19.R49631	MC20.MG24.AS1.I27.R42842									MC20.MG36.AS1.I31.R62014
						MC20.MG20.AS1.I22.R54994															MC20.MG31.AS1.I33.R57520					MC20.MG23.AS1.I19.R49652	MC20.MG24.AS1.I27.R42921									MC20.MG36.AS1.I31.R6205
						MC20.MG20.AS1.I22.R55053															MC20.MG31.AS1.I33.R5755					MC20.MG23.AS1.I19.R49819	MC20.MG24.AS1.I27.R43012									MC20.MG36.AS1.I31.R62123
						MC20.MG20.AS1.I22.R55153															MC20.MG31.AS1.I33.R57690					MC20.MG23.AS1.I19.R49963	MC20.MG24.AS1.I27.R4330									MC20.MG36.AS1.I31.R6286
						MC20.MG20.AS1.I22.R55192															MC20.MG31.AS1.I33.R57701					MC20.MG23.AS1.I19.R50025	MC20.MG24.AS1.I27.R43359									MC20.MG36.AS1.I31.R629
						MC20.MG20.AS1.I22.R55237															MC20.MG31.AS1.I33.R57723					MC20.MG23.AS1.I19.R50047	MC20.MG24.AS1.I27.R43361									MC20.MG36.AS1.I31.R62938
						MC20.MG20.AS1.I22.R55296															MC20.MG31.AS1.I33.R57930					MC20.MG23.AS1.I19.R50207	MC20.MG24.AS1.I27.R43386									MC20.MG36.AS1.I31.R62956
						MC20.MG20.AS1.I22.R55352															MC20.MG31.AS1.I33.R57934					MC20.MG23.AS1.I19.R5041	MC20.MG24.AS1.I27.R43453									MC20.MG36.AS1.I31.R63083
						MC20.MG20.AS1.I22.R55489															MC20.MG31.AS1.I33.R57998					MC20.MG23.AS1.I19.R5067	MC20.MG24.AS1.I27.R43592									MC20.MG36.AS1.I31.R6310
						MC20.MG20.AS1.I22.R55611															MC20.MG31.AS1.I33.R5810					MC20.MG23.AS1.I19.R50674	MC20.MG24.AS1.I27.R43593									MC20.MG36.AS1.I31.R63375
						MC20.MG20.AS1.I22.R55632															MC20.MG31.AS1.I33.R58146					MC20.MG23.AS1.I19.R50716	MC20.MG24.AS1.I27.R43759									MC20.MG36.AS1.I31.R63493
						MC20.MG20.AS1.I22.R55875															MC20.MG31.AS1.I33.R58162					MC20.MG23.AS1.I19.R50795	MC20.MG24.AS1.I27.R43781									MC20.MG36.AS1.I31.R64050
						MC20.MG20.AS1.I22.R55904															MC20.MG31.AS1.I33.R58195					MC20.MG23.AS1.I19.R5106	MC20.MG24.AS1.I27.R43823									MC20.MG36.AS1.I31.R64125
						MC20.MG20.AS1.I22.R55960															MC20.MG31.AS1.I33.R58296					MC20.MG23.AS1.I19.R51082	MC20.MG24.AS1.I27.R43830									MC20.MG36.AS1.I31.R64138
						MC20.MG20.AS1.I22.R56006															MC20.MG31.AS1.I33.R58339					MC20.MG23.AS1.I19.R51113	MC20.MG24.AS1.I27.R43962									MC20.MG36.AS1.I31.R643
						MC20.MG20.AS1.I22.R56033															MC20.MG31.AS1.I33.R58358					MC20.MG23.AS1.I19.R51188	MC20.MG24.AS1.I27.R4413									MC20.MG36.AS1.I31.R64478
						MC20.MG20.AS1.I22.R56034															MC20.MG31.AS1.I33.R58626					MC20.MG23.AS1.I19.R51265	MC20.MG24.AS1.I27.R44364									MC20.MG36.AS1.I31.R65398
						MC20.MG20.AS1.I22.R5604															MC20.MG31.AS1.I33.R58646					MC20.MG23.AS1.I19.R51563	MC20.MG24.AS1.I27.R44368									MC20.MG36.AS1.I31.R65470
						MC20.MG20.AS1.I22.R56220															MC20.MG31.AS1.I33.R58822					MC20.MG23.AS1.I19.R5162	MC20.MG24.AS1.I27.R44378									MC20.MG36.AS1.I31.R65619
						MC20.MG20.AS1.I22.R56223															MC20.MG31.AS1.I33.R58932					MC20.MG23.AS1.I19.R51671	MC20.MG24.AS1.I27.R44427									MC20.MG36.AS1.I31.R66500
						MC20.MG20.AS1.I22.R56451															MC20.MG31.AS1.I33.R58955					MC20.MG23.AS1.I19.R51750	MC20.MG24.AS1.I27.R44489									MC20.MG36.AS1.I31.R66514
						MC20.MG20.AS1.I22.R56469															MC20.MG31.AS1.I33.R58998					MC20.MG23.AS1.I19.R51823	MC20.MG24.AS1.I27.R44498									MC20.MG36.AS1.I31.R67028
						MC20.MG20.AS1.I22.R56482															MC20.MG31.AS1.I33.R59110					MC20.MG23.AS1.I19.R51831	MC20.MG24.AS1.I27.R44535									MC20.MG36.AS1.I31.R675
						MC20.MG20.AS1.I22.R56546															MC20.MG31.AS1.I33.R59152					MC20.MG23.AS1.I19.R52022	MC20.MG24.AS1.I27.R4454									MC20.MG36.AS1.I31.R6754
						MC20.MG20.AS1.I22.R56632															MC20.MG31.AS1.I33.R59153					MC20.MG23.AS1.I19.R52054	MC20.MG24.AS1.I27.R44600									MC20.MG36.AS1.I31.R67602
						MC20.MG20.AS1.I22.R56748															MC20.MG31.AS1.I33.R59229					MC20.MG23.AS1.I19.R52338	MC20.MG24.AS1.I27.R44629									MC20.MG36.AS1.I31.R67748
						MC20.MG20.AS1.I22.R5677															MC20.MG31.AS1.I33.R59335					MC20.MG23.AS1.I19.R52362	MC20.MG24.AS1.I27.R44631									MC20.MG36.AS1.I31.R67765
						MC20.MG20.AS1.I22.R56967															MC20.MG31.AS1.I33.R59394					MC20.MG23.AS1.I19.R52458	MC20.MG24.AS1.I27.R44689									MC20.MG36.AS1.I31.R68531
						MC20.MG20.AS1.I22.R57026															MC20.MG31.AS1.I33.R59454					MC20.MG23.AS1.I19.R52468	MC20.MG24.AS1.I27.R44726									MC20.MG36.AS1.I31.R6858
						MC20.MG20.AS1.I22.R57053															MC20.MG31.AS1.I33.R59540					MC20.MG23.AS1.I19.R52490	MC20.MG24.AS1.I27.R4485									MC20.MG36.AS1.I31.R68585
						MC20.MG20.AS1.I22.R57130															MC20.MG31.AS1.I33.R59639					MC20.MG23.AS1.I19.R52715	MC20.MG24.AS1.I27.R4487									MC20.MG36.AS1.I31.R68681
						MC20.MG20.AS1.I22.R5718															MC20.MG31.AS1.I33.R59640					MC20.MG23.AS1.I19.R52745	MC20.MG24.AS1.I27.R4492									MC20.MG36.AS1.I31.R68842
						MC20.MG20.AS1.I22.R5724															MC20.MG31.AS1.I33.R59747					MC20.MG23.AS1.I19.R52791	MC20.MG24.AS1.I27.R44935									MC20.MG36.AS1.I31.R69009
						MC20.MG20.AS1.I22.R57261															MC20.MG31.AS1.I33.R59758					MC20.MG23.AS1.I19.R53078	MC20.MG24.AS1.I27.R44982									MC20.MG36.AS1.I31.R69124
						MC20.MG20.AS1.I22.R57570															MC20.MG31.AS1.I33.R59837					MC20.MG23.AS1.I19.R53107	MC20.MG24.AS1.I27.R45000									MC20.MG36.AS1.I31.R69323
						MC20.MG20.AS1.I22.R57595															MC20.MG31.AS1.I33.R59922					MC20.MG23.AS1.I19.R53283	MC20.MG24.AS1.I27.R45047									MC20.MG36.AS1.I31.R69439
						MC20.MG20.AS1.I22.R57648															MC20.MG31.AS1.I33.R59938					MC20.MG23.AS1.I19.R53314	MC20.MG24.AS1.I27.R45167									MC20.MG36.AS1.I31.R69623
						MC20.MG20.AS1.I22.R57858															MC20.MG31.AS1.I33.R59975					MC20.MG23.AS1.I19.R53367	MC20.MG24.AS1.I27.R4525									MC20.MG36.AS1.I31.R69943
						MC20.MG20.AS1.I22.R58010															MC20.MG31.AS1.I33.R60144					MC20.MG23.AS1.I19.R53499	MC20.MG24.AS1.I27.R45297									MC20.MG36.AS1.I31.R70142
						MC20.MG20.AS1.I22.R58026															MC20.MG31.AS1.I33.R6026					MC20.MG23.AS1.I19.R53623	MC20.MG24.AS1.I27.R45381									MC20.MG36.AS1.I31.R70416
						MC20.MG20.AS1.I22.R58236															MC20.MG31.AS1.I33.R60267					MC20.MG23.AS1.I19.R53665	MC20.MG24.AS1.I27.R45437									MC20.MG36.AS1.I31.R70463
						MC20.MG20.AS1.I22.R58238															MC20.MG31.AS1.I33.R60298					MC20.MG23.AS1.I19.R53730	MC20.MG24.AS1.I27.R45448									MC20.MG36.AS1.I31.R70594
						MC20.MG20.AS1.I22.R5826															MC20.MG31.AS1.I33.R60465					MC20.MG23.AS1.I19.R53898	MC20.MG24.AS1.I27.R45449									MC20.MG36.AS1.I31.R70611
						MC20.MG20.AS1.I22.R58549															MC20.MG31.AS1.I33.R60493					MC20.MG23.AS1.I19.R54052	MC20.MG24.AS1.I27.R45497									MC20.MG36.AS1.I31.R70945
						MC20.MG20.AS1.I22.R58564															MC20.MG31.AS1.I33.R60613					MC20.MG23.AS1.I19.R54194	MC20.MG24.AS1.I27.R45569									MC20.MG36.AS1.I31.R70981
						MC20.MG20.AS1.I22.R5869															MC20.MG31.AS1.I33.R60638					MC20.MG23.AS1.I19.R5421	MC20.MG24.AS1.I27.R45581									MC20.MG36.AS1.I31.R71190
						MC20.MG20.AS1.I22.R58727															MC20.MG31.AS1.I33.R60733					MC20.MG23.AS1.I19.R54212	MC20.MG24.AS1.I27.R45647									MC20.MG36.AS1.I31.R71342
						MC20.MG20.AS1.I22.R58732															MC20.MG31.AS1.I33.R60881					MC20.MG23.AS1.I19.R54219	MC20.MG24.AS1.I27.R45799									MC20.MG36.AS1.I31.R7137
						MC20.MG20.AS1.I22.R58767															MC20.MG31.AS1.I33.R61013					MC20.MG23.AS1.I19.R54468	MC20.MG24.AS1.I27.R45821									MC20.MG36.AS1.I31.R71453
						MC20.MG20.AS1.I22.R58852															MC20.MG31.AS1.I33.R61129					MC20.MG23.AS1.I19.R54648	MC20.MG24.AS1.I27.R45909									MC20.MG36.AS1.I31.R71772
						MC20.MG20.AS1.I22.R58952															MC20.MG31.AS1.I33.R61135					MC20.MG23.AS1.I19.R54879	MC20.MG24.AS1.I27.R45947									MC20.MG36.AS1.I31.R72034
						MC20.MG20.AS1.I22.R59008															MC20.MG31.AS1.I33.R61263					MC20.MG23.AS1.I19.R54886	MC20.MG24.AS1.I27.R46024									MC20.MG36.AS1.I31.R72367
						MC20.MG20.AS1.I22.R5918															MC20.MG31.AS1.I33.R61290					MC20.MG23.AS1.I19.R54926	MC20.MG24.AS1.I27.R46164									MC20.MG36.AS1.I31.R7240
						MC20.MG20.AS1.I22.R59754															MC20.MG31.AS1.I33.R61337					MC20.MG23.AS1.I19.R55097	MC20.MG24.AS1.I27.R46233									MC20.MG36.AS1.I31.R72406
						MC20.MG20.AS1.I22.R59912															MC20.MG31.AS1.I33.R61368					MC20.MG23.AS1.I19.R55117	MC20.MG24.AS1.I27.R46244									MC20.MG36.AS1.I31.R72534
						MC20.MG20.AS1.I22.R59957															MC20.MG31.AS1.I33.R61420					MC20.MG23.AS1.I19.R55224	MC20.MG24.AS1.I27.R46246									MC20.MG36.AS1.I31.R72824
						MC20.MG20.AS1.I22.R59962															MC20.MG31.AS1.I33.R6156					MC20.MG23.AS1.I19.R55229	MC20.MG24.AS1.I27.R46298									MC20.MG36.AS1.I31.R72964
						MC20.MG20.AS1.I22.R5999															MC20.MG31.AS1.I33.R61772					MC20.MG23.AS1.I19.R55429	MC20.MG24.AS1.I27.R46402									MC20.MG36.AS1.I31.R72994
						MC20.MG20.AS1.I22.R60051															MC20.MG31.AS1.I33.R61942					MC20.MG23.AS1.I19.R55540	MC20.MG24.AS1.I27.R46426									MC20.MG36.AS1.I31.R73051
						MC20.MG20.AS1.I22.R60102															MC20.MG31.AS1.I33.R61952					MC20.MG23.AS1.I19.R55621	MC20.MG24.AS1.I27.R46486									MC20.MG36.AS1.I31.R73058
						MC20.MG20.AS1.I22.R60178															MC20.MG31.AS1.I33.R62053					MC20.MG23.AS1.I19.R55784	MC20.MG24.AS1.I27.R46525									MC20.MG36.AS1.I31.R73108
						MC20.MG20.AS1.I22.R60256															MC20.MG31.AS1.I33.R62433					MC20.MG23.AS1.I19.R5585	MC20.MG24.AS1.I27.R46616									MC20.MG36.AS1.I31.R73196
						MC20.MG20.AS1.I22.R60381															MC20.MG31.AS1.I33.R62540					MC20.MG23.AS1.I19.R56204	MC20.MG24.AS1.I27.R46645									MC20.MG36.AS1.I31.R73290
						MC20.MG20.AS1.I22.R60458															MC20.MG31.AS1.I33.R62606					MC20.MG23.AS1.I19.R56275	MC20.MG24.AS1.I27.R46679									MC20.MG36.AS1.I31.R73795
						MC20.MG20.AS1.I22.R60495															MC20.MG31.AS1.I33.R62791					MC20.MG23.AS1.I19.R56379	MC20.MG24.AS1.I27.R46706									MC20.MG36.AS1.I31.R73965
						MC20.MG20.AS1.I22.R60523															MC20.MG31.AS1.I33.R63048					MC20.MG23.AS1.I19.R56391	MC20.MG24.AS1.I27.R46942									MC20.MG36.AS1.I31.R74075
						MC20.MG20.AS1.I22.R60555															MC20.MG31.AS1.I33.R63079					MC20.MG23.AS1.I19.R56421	MC20.MG24.AS1.I27.R47066									MC20.MG36.AS1.I31.R7411
						MC20.MG20.AS1.I22.R60768															MC20.MG31.AS1.I33.R63152					MC20.MG23.AS1.I19.R56744	MC20.MG24.AS1.I27.R47142									MC20.MG36.AS1.I31.R74518
						MC20.MG20.AS1.I22.R6090															MC20.MG31.AS1.I33.R63269					MC20.MG23.AS1.I19.R57	MC20.MG24.AS1.I27.R47238									MC20.MG36.AS1.I31.R7457
						MC20.MG20.AS1.I22.R61159															MC20.MG31.AS1.I33.R63442					MC20.MG23.AS1.I19.R57026	MC20.MG24.AS1.I27.R47251									MC20.MG36.AS1.I31.R74590
						MC20.MG20.AS1.I22.R61301															MC20.MG31.AS1.I33.R63508					MC20.MG23.AS1.I19.R57337	MC20.MG24.AS1.I27.R47289									MC20.MG36.AS1.I31.R74888
						MC20.MG20.AS1.I22.R61390															MC20.MG31.AS1.I33.R63571					MC20.MG23.AS1.I19.R57492	MC20.MG24.AS1.I27.R47298									MC20.MG36.AS1.I31.R75163
						MC20.MG20.AS1.I22.R61421															MC20.MG31.AS1.I33.R63674					MC20.MG23.AS1.I19.R57497	MC20.MG24.AS1.I27.R4743									MC20.MG36.AS1.I31.R75579
						MC20.MG20.AS1.I22.R61450															MC20.MG31.AS1.I33.R63739					MC20.MG23.AS1.I19.R57554	MC20.MG24.AS1.I27.R47658									MC20.MG36.AS1.I31.R75734
						MC20.MG20.AS1.I22.R61559															MC20.MG31.AS1.I33.R63840					MC20.MG23.AS1.I19.R57629	MC20.MG24.AS1.I27.R47838									MC20.MG36.AS1.I31.R7605
						MC20.MG20.AS1.I22.R61585															MC20.MG31.AS1.I33.R64115					MC20.MG23.AS1.I19.R57696	MC20.MG24.AS1.I27.R47850									MC20.MG36.AS1.I31.R76405
						MC20.MG20.AS1.I22.R61593															MC20.MG31.AS1.I33.R64193					MC20.MG23.AS1.I19.R57826	MC20.MG24.AS1.I27.R47857									MC20.MG36.AS1.I31.R7645
						MC20.MG20.AS1.I22.R61623															MC20.MG31.AS1.I33.R64358					MC20.MG23.AS1.I19.R57882	MC20.MG24.AS1.I27.R47896									MC20.MG36.AS1.I31.R76739
						MC20.MG20.AS1.I22.R61635															MC20.MG31.AS1.I33.R64501					MC20.MG23.AS1.I19.R57909	MC20.MG24.AS1.I27.R47897									MC20.MG36.AS1.I31.R76815
						MC20.MG20.AS1.I22.R61649															MC20.MG31.AS1.I33.R64527					MC20.MG23.AS1.I19.R57944	MC20.MG24.AS1.I27.R47922									MC20.MG36.AS1.I31.R77094
						MC20.MG20.AS1.I22.R61655															MC20.MG31.AS1.I33.R64553					MC20.MG23.AS1.I19.R57974	MC20.MG24.AS1.I27.R47953									MC20.MG36.AS1.I31.R77163
						MC20.MG20.AS1.I22.R61657															MC20.MG31.AS1.I33.R64606					MC20.MG23.AS1.I19.R58054	MC20.MG24.AS1.I27.R47967									MC20.MG36.AS1.I31.R77308
						MC20.MG20.AS1.I22.R61702															MC20.MG31.AS1.I33.R64686					MC20.MG23.AS1.I19.R58199	MC20.MG24.AS1.I27.R48107									MC20.MG36.AS1.I31.R77761
						MC20.MG20.AS1.I22.R61745															MC20.MG31.AS1.I33.R64996					MC20.MG23.AS1.I19.R58221	MC20.MG24.AS1.I27.R4813									MC20.MG36.AS1.I31.R77848
						MC20.MG20.AS1.I22.R61950															MC20.MG31.AS1.I33.R65070					MC20.MG23.AS1.I19.R58265	MC20.MG24.AS1.I27.R48158									MC20.MG36.AS1.I31.R77943
						MC20.MG20.AS1.I22.R61971															MC20.MG31.AS1.I33.R65091					MC20.MG23.AS1.I19.R58574	MC20.MG24.AS1.I27.R48160									MC20.MG36.AS1.I31.R78031
						MC20.MG20.AS1.I22.R62051															MC20.MG31.AS1.I33.R65422					MC20.MG23.AS1.I19.R58915	MC20.MG24.AS1.I27.R48235									MC20.MG36.AS1.I31.R78340
						MC20.MG20.AS1.I22.R62162															MC20.MG31.AS1.I33.R65530					MC20.MG23.AS1.I19.R58923	MC20.MG24.AS1.I27.R48288									MC20.MG36.AS1.I31.R78662
						MC20.MG20.AS1.I22.R62202															MC20.MG31.AS1.I33.R65663					MC20.MG23.AS1.I19.R58965	MC20.MG24.AS1.I27.R48422									MC20.MG36.AS1.I31.R78718
						MC20.MG20.AS1.I22.R62227															MC20.MG31.AS1.I33.R65716					MC20.MG23.AS1.I19.R59082	MC20.MG24.AS1.I27.R48531									MC20.MG36.AS1.I31.R79035
						MC20.MG20.AS1.I22.R62254															MC20.MG31.AS1.I33.R65815					MC20.MG23.AS1.I19.R59113	MC20.MG24.AS1.I27.R48549									MC20.MG36.AS1.I31.R7913
						MC20.MG20.AS1.I22.R6227															MC20.MG31.AS1.I33.R65841					MC20.MG23.AS1.I19.R59145	MC20.MG24.AS1.I27.R4863									MC20.MG36.AS1.I31.R79175
						MC20.MG20.AS1.I22.R62381															MC20.MG31.AS1.I33.R65855					MC20.MG23.AS1.I19.R59359	MC20.MG24.AS1.I27.R48690									MC20.MG36.AS1.I31.R79551
						MC20.MG20.AS1.I22.R62425															MC20.MG31.AS1.I33.R66003					MC20.MG23.AS1.I19.R59396	MC20.MG24.AS1.I27.R48721									MC20.MG36.AS1.I31.R79686
						MC20.MG20.AS1.I22.R62477															MC20.MG31.AS1.I33.R66119					MC20.MG23.AS1.I19.R59852	MC20.MG24.AS1.I27.R4874									MC20.MG36.AS1.I31.R79695
						MC20.MG20.AS1.I22.R62553															MC20.MG31.AS1.I33.R66172					MC20.MG23.AS1.I19.R59890	MC20.MG24.AS1.I27.R48755									MC20.MG36.AS1.I31.R79794
						MC20.MG20.AS1.I22.R62572															MC20.MG31.AS1.I33.R66212					MC20.MG23.AS1.I19.R59930	MC20.MG24.AS1.I27.R48820									MC20.MG36.AS1.I31.R80125
						MC20.MG20.AS1.I22.R62637															MC20.MG31.AS1.I33.R66251					MC20.MG23.AS1.I19.R60084	MC20.MG24.AS1.I27.R48856									MC20.MG36.AS1.I31.R803
						MC20.MG20.AS1.I22.R62676															MC20.MG31.AS1.I33.R66259					MC20.MG23.AS1.I19.R6029	MC20.MG24.AS1.I27.R4894									MC20.MG36.AS1.I31.R80404
						MC20.MG20.AS1.I22.R62713															MC20.MG31.AS1.I33.R66340					MC20.MG23.AS1.I19.R60650	MC20.MG24.AS1.I27.R48982									MC20.MG36.AS1.I31.R80452
						MC20.MG20.AS1.I22.R62769															MC20.MG31.AS1.I33.R66352					MC20.MG23.AS1.I19.R60671	MC20.MG24.AS1.I27.R48992									MC20.MG36.AS1.I31.R80525
						MC20.MG20.AS1.I22.R62835															MC20.MG31.AS1.I33.R66523					MC20.MG23.AS1.I19.R60697	MC20.MG24.AS1.I27.R49040									MC20.MG36.AS1.I31.R80612
						MC20.MG20.AS1.I22.R6382															MC20.MG31.AS1.I33.R66556					MC20.MG23.AS1.I19.R60807	MC20.MG24.AS1.I27.R49046									MC20.MG36.AS1.I31.R80760
						MC20.MG20.AS1.I22.R6410															MC20.MG31.AS1.I33.R66725					MC20.MG23.AS1.I19.R60820	MC20.MG24.AS1.I27.R49125									MC20.MG36.AS1.I31.R80762
						MC20.MG20.AS1.I22.R6473															MC20.MG31.AS1.I33.R66883					MC20.MG23.AS1.I19.R60916	MC20.MG24.AS1.I27.R49133									MC20.MG36.AS1.I31.R80779
						MC20.MG20.AS1.I22.R6475															MC20.MG31.AS1.I33.R66984					MC20.MG23.AS1.I19.R60926	MC20.MG24.AS1.I27.R49137									MC20.MG36.AS1.I31.R81290
						MC20.MG20.AS1.I22.R6537															MC20.MG31.AS1.I33.R67029					MC20.MG23.AS1.I19.R60950	MC20.MG24.AS1.I27.R49261									MC20.MG36.AS1.I31.R8173
						MC20.MG20.AS1.I22.R6541															MC20.MG31.AS1.I33.R67060					MC20.MG23.AS1.I19.R61036	MC20.MG24.AS1.I27.R49296									MC20.MG36.AS1.I31.R81763
						MC20.MG20.AS1.I22.R6694															MC20.MG31.AS1.I33.R67124					MC20.MG23.AS1.I19.R61063	MC20.MG24.AS1.I27.R49349									MC20.MG36.AS1.I31.R81870
						MC20.MG20.AS1.I22.R6699															MC20.MG31.AS1.I33.R67203					MC20.MG23.AS1.I19.R6113	MC20.MG24.AS1.I27.R49450									MC20.MG36.AS1.I31.R82198
						MC20.MG20.AS1.I22.R6846															MC20.MG31.AS1.I33.R67465					MC20.MG23.AS1.I19.R6285	MC20.MG24.AS1.I27.R49453									MC20.MG36.AS1.I31.R82561
						MC20.MG20.AS1.I22.R6865															MC20.MG31.AS1.I33.R6770					MC20.MG23.AS1.I19.R6565	MC20.MG24.AS1.I27.R49466									MC20.MG36.AS1.I31.R82597
						MC20.MG20.AS1.I22.R6910															MC20.MG31.AS1.I33.R68147					MC20.MG23.AS1.I19.R6605	MC20.MG24.AS1.I27.R49651									MC20.MG36.AS1.I31.R82678
						MC20.MG20.AS1.I22.R7039															MC20.MG31.AS1.I33.R68159					MC20.MG23.AS1.I19.R6699	MC20.MG24.AS1.I27.R49659									MC20.MG36.AS1.I31.R82856
						MC20.MG20.AS1.I22.R7054															MC20.MG31.AS1.I33.R6825					MC20.MG23.AS1.I19.R6808	MC20.MG24.AS1.I27.R49698									MC20.MG36.AS1.I31.R83037
						MC20.MG20.AS1.I22.R7071															MC20.MG31.AS1.I33.R68363					MC20.MG23.AS1.I19.R6969	MC20.MG24.AS1.I27.R49741									MC20.MG36.AS1.I31.R83123
						MC20.MG20.AS1.I22.R7154															MC20.MG31.AS1.I33.R6839					MC20.MG23.AS1.I19.R698	MC20.MG24.AS1.I27.R49957									MC20.MG36.AS1.I31.R83230
						MC20.MG20.AS1.I22.R72															MC20.MG31.AS1.I33.R68408					MC20.MG23.AS1.I19.R6997	MC20.MG24.AS1.I27.R49998									MC20.MG36.AS1.I31.R83399
						MC20.MG20.AS1.I22.R7312															MC20.MG31.AS1.I33.R68410					MC20.MG23.AS1.I19.R7026	MC20.MG24.AS1.I27.R5001									MC20.MG36.AS1.I31.R83447
						MC20.MG20.AS1.I22.R7352															MC20.MG31.AS1.I33.R6860					MC20.MG23.AS1.I19.R7091	MC20.MG24.AS1.I27.R50051									MC20.MG36.AS1.I31.R83589
						MC20.MG20.AS1.I22.R7407															MC20.MG31.AS1.I33.R68641					MC20.MG23.AS1.I19.R7386	MC20.MG24.AS1.I27.R5007									MC20.MG36.AS1.I31.R84129
						MC20.MG20.AS1.I22.R75															MC20.MG31.AS1.I33.R68689					MC20.MG23.AS1.I19.R7547	MC20.MG24.AS1.I27.R50104									MC20.MG36.AS1.I31.R84177
						MC20.MG20.AS1.I22.R7511															MC20.MG31.AS1.I33.R68883					MC20.MG23.AS1.I19.R7628	MC20.MG24.AS1.I27.R50127									MC20.MG36.AS1.I31.R84187
						MC20.MG20.AS1.I22.R7551															MC20.MG31.AS1.I33.R68936					MC20.MG23.AS1.I19.R7668	MC20.MG24.AS1.I27.R50294									MC20.MG36.AS1.I31.R84444
						MC20.MG20.AS1.I22.R7633															MC20.MG31.AS1.I33.R68949					MC20.MG23.AS1.I19.R7722	MC20.MG24.AS1.I27.R50396									MC20.MG36.AS1.I31.R84593
						MC20.MG20.AS1.I22.R770															MC20.MG31.AS1.I33.R69114					MC20.MG23.AS1.I19.R7789	MC20.MG24.AS1.I27.R50410									MC20.MG36.AS1.I31.R84749
						MC20.MG20.AS1.I22.R7765															MC20.MG31.AS1.I33.R69299					MC20.MG23.AS1.I19.R7827	MC20.MG24.AS1.I27.R50497									MC20.MG36.AS1.I31.R84828
						MC20.MG20.AS1.I22.R7788															MC20.MG31.AS1.I33.R69316					MC20.MG23.AS1.I19.R7836	MC20.MG24.AS1.I27.R50504									MC20.MG36.AS1.I31.R85015
						MC20.MG20.AS1.I22.R7814															MC20.MG31.AS1.I33.R69343					MC20.MG23.AS1.I19.R7975	MC20.MG24.AS1.I27.R50550									MC20.MG36.AS1.I31.R85245
						MC20.MG20.AS1.I22.R7896															MC20.MG31.AS1.I33.R6935					MC20.MG23.AS1.I19.R801	MC20.MG24.AS1.I27.R50593									MC20.MG36.AS1.I31.R85269
						MC20.MG20.AS1.I22.R7934															MC20.MG31.AS1.I33.R69357					MC20.MG23.AS1.I19.R8171	MC20.MG24.AS1.I27.R50768									MC20.MG36.AS1.I31.R85468
						MC20.MG20.AS1.I22.R7974															MC20.MG31.AS1.I33.R69553					MC20.MG23.AS1.I19.R8184	MC20.MG24.AS1.I27.R50799									MC20.MG36.AS1.I31.R85503
						MC20.MG20.AS1.I22.R7996															MC20.MG31.AS1.I33.R69697					MC20.MG23.AS1.I19.R8186	MC20.MG24.AS1.I27.R50920									MC20.MG36.AS1.I31.R85723
						MC20.MG20.AS1.I22.R8119															MC20.MG31.AS1.I33.R69889					MC20.MG23.AS1.I19.R8217	MC20.MG24.AS1.I27.R50950									MC20.MG36.AS1.I31.R859
						MC20.MG20.AS1.I22.R8191															MC20.MG31.AS1.I33.R69989					MC20.MG23.AS1.I19.R8221	MC20.MG24.AS1.I27.R5101									MC20.MG36.AS1.I31.R86320
						MC20.MG20.AS1.I22.R8291															MC20.MG31.AS1.I33.R70204					MC20.MG23.AS1.I19.R8232	MC20.MG24.AS1.I27.R51038									MC20.MG36.AS1.I31.R86532
						MC20.MG20.AS1.I22.R842															MC20.MG31.AS1.I33.R70212					MC20.MG23.AS1.I19.R8236	MC20.MG24.AS1.I27.R51048									MC20.MG36.AS1.I31.R86938
						MC20.MG20.AS1.I22.R8420															MC20.MG31.AS1.I33.R70288					MC20.MG23.AS1.I19.R840	MC20.MG24.AS1.I27.R51068									MC20.MG36.AS1.I31.R87003
						MC20.MG20.AS1.I22.R8523															MC20.MG31.AS1.I33.R70295					MC20.MG23.AS1.I19.R8482	MC20.MG24.AS1.I27.R5109									MC20.MG36.AS1.I31.R87114
						MC20.MG20.AS1.I22.R8527															MC20.MG31.AS1.I33.R70573					MC20.MG23.AS1.I19.R8496	MC20.MG24.AS1.I27.R51123									MC20.MG36.AS1.I31.R87183
						MC20.MG20.AS1.I22.R8555															MC20.MG31.AS1.I33.R70699					MC20.MG23.AS1.I19.R8800	MC20.MG24.AS1.I27.R51168									MC20.MG36.AS1.I31.R87347
						MC20.MG20.AS1.I22.R8747															MC20.MG31.AS1.I33.R70918					MC20.MG23.AS1.I19.R8940	MC20.MG24.AS1.I27.R51312									MC20.MG36.AS1.I31.R88077
						MC20.MG20.AS1.I22.R8850															MC20.MG31.AS1.I33.R70921					MC20.MG23.AS1.I19.R9205	MC20.MG24.AS1.I27.R51498									MC20.MG36.AS1.I31.R88323
						MC20.MG20.AS1.I22.R8973															MC20.MG31.AS1.I33.R71087					MC20.MG23.AS1.I19.R9315	MC20.MG24.AS1.I27.R51573									MC20.MG36.AS1.I31.R88410
						MC20.MG20.AS1.I22.R9058															MC20.MG31.AS1.I33.R71208					MC20.MG23.AS1.I19.R9354	MC20.MG24.AS1.I27.R516									MC20.MG36.AS1.I31.R88532
						MC20.MG20.AS1.I22.R9078															MC20.MG31.AS1.I33.R71315					MC20.MG23.AS1.I19.R9607	MC20.MG24.AS1.I27.R51772									MC20.MG36.AS1.I31.R88564
						MC20.MG20.AS1.I22.R9150															MC20.MG31.AS1.I33.R71544					MC20.MG23.AS1.I19.R9792	MC20.MG24.AS1.I27.R51783									MC20.MG36.AS1.I31.R88598
						MC20.MG20.AS1.I22.R9176															MC20.MG31.AS1.I33.R71677					MC20.MG23.AS1.I2.C10	MC20.MG24.AS1.I27.R51888									MC20.MG36.AS1.I31.R88645
						MC20.MG20.AS1.I22.R9177															MC20.MG31.AS1.I33.R71682					MC20.MG23.AS1.I2.C107	MC20.MG24.AS1.I27.R51915									MC20.MG36.AS1.I31.R88817
						MC20.MG20.AS1.I22.R918															MC20.MG31.AS1.I33.R71786					MC20.MG23.AS1.I2.C143	MC20.MG24.AS1.I27.R52013									MC20.MG36.AS1.I31.R89198
						MC20.MG20.AS1.I22.R9222															MC20.MG31.AS1.I33.R72128					MC20.MG23.AS1.I2.C40	MC20.MG24.AS1.I27.R52026									MC20.MG36.AS1.I31.R89240
						MC20.MG20.AS1.I22.R923															MC20.MG31.AS1.I33.R72158					MC20.MG23.AS1.I2.C92	MC20.MG24.AS1.I27.R52044									MC20.MG36.AS1.I31.R8950
						MC20.MG20.AS1.I22.R9263															MC20.MG31.AS1.I33.R72319					MC20.MG23.AS1.I4.C8	MC20.MG24.AS1.I27.R52117									MC20.MG36.AS1.I31.R89633
						MC20.MG20.AS1.I22.R9371															MC20.MG31.AS1.I33.R72337					MC20.MG23.AS1.I5.C5	MC20.MG24.AS1.I27.R52129									MC20.MG36.AS1.I31.R89945
						MC20.MG20.AS1.I22.R9374															MC20.MG31.AS1.I33.R72709						MC20.MG24.AS1.I27.R52166									MC20.MG36.AS1.I31.R89978
						MC20.MG20.AS1.I22.R9445															MC20.MG31.AS1.I33.R72897						MC20.MG24.AS1.I27.R52196									MC20.MG36.AS1.I31.R90326
						MC20.MG20.AS1.I22.R9546															MC20.MG31.AS1.I33.R72944						MC20.MG24.AS1.I27.R52216									MC20.MG36.AS1.I31.R90333
						MC20.MG20.AS1.I22.R9581															MC20.MG31.AS1.I33.R73058						MC20.MG24.AS1.I27.R52315									MC20.MG36.AS1.I31.R90561
						MC20.MG20.AS1.I22.R9609															MC20.MG31.AS1.I33.R7311						MC20.MG24.AS1.I27.R52316									MC20.MG36.AS1.I31.R90564
						MC20.MG20.AS1.I22.R9643															MC20.MG31.AS1.I33.R73209						MC20.MG24.AS1.I27.R5239									MC20.MG36.AS1.I31.R90573
						MC20.MG20.AS1.I22.R9865															MC20.MG31.AS1.I33.R73407						MC20.MG24.AS1.I27.R52401									MC20.MG36.AS1.I31.R90605
						MC20.MG20.AS1.I22.R9927															MC20.MG31.AS1.I33.R73491						MC20.MG24.AS1.I27.R52424									MC20.MG36.AS1.I31.R90609
						MC20.MG20.AS1.I22.R997															MC20.MG31.AS1.I33.R73650						MC20.MG24.AS1.I27.R52469									MC20.MG36.AS1.I31.R90679
						MC20.MG20.AS1.I22.R9991															MC20.MG31.AS1.I33.R73672						MC20.MG24.AS1.I27.R52488									MC20.MG36.AS1.I31.R974
						MC20.MG20.AS1.I8.C6															MC20.MG31.AS1.I33.R74148						MC20.MG24.AS1.I27.R52584									MC20.MG36.AS1.I8.C1
						MC20.MG20.AS1.I9.C1															MC20.MG31.AS1.I33.R74286						MC20.MG24.AS1.I27.R52617
																					MC20.MG31.AS1.I33.R74332						MC20.MG24.AS1.I27.R52644
																					MC20.MG31.AS1.I33.R74336						MC20.MG24.AS1.I27.R52730
																					MC20.MG31.AS1.I33.R74677						MC20.MG24.AS1.I27.R5275
																					MC20.MG31.AS1.I33.R74752						MC20.MG24.AS1.I27.R52770
																					MC20.MG31.AS1.I33.R74948						MC20.MG24.AS1.I27.R5284
																					MC20.MG31.AS1.I33.R74959						MC20.MG24.AS1.I27.R52851
																					MC20.MG31.AS1.I33.R75174						MC20.MG24.AS1.I27.R52904
																					MC20.MG31.AS1.I33.R75176						MC20.MG24.AS1.I27.R52916
																					MC20.MG31.AS1.I33.R75230						MC20.MG24.AS1.I27.R53004
																					MC20.MG31.AS1.I33.R75268						MC20.MG24.AS1.I27.R53011
																					MC20.MG31.AS1.I33.R754						MC20.MG24.AS1.I27.R53066
																					MC20.MG31.AS1.I33.R75415						MC20.MG24.AS1.I27.R53067
																					MC20.MG31.AS1.I33.R75531						MC20.MG24.AS1.I27.R53091
																					MC20.MG31.AS1.I33.R75533						MC20.MG24.AS1.I27.R53146
																					MC20.MG31.AS1.I33.R75628						MC20.MG24.AS1.I27.R53196
																					MC20.MG31.AS1.I33.R75689						MC20.MG24.AS1.I27.R53233
																					MC20.MG31.AS1.I33.R75733						MC20.MG24.AS1.I27.R53312
																					MC20.MG31.AS1.I33.R75836						MC20.MG24.AS1.I27.R53321
																					MC20.MG31.AS1.I33.R76043						MC20.MG24.AS1.I27.R53328
																					MC20.MG31.AS1.I33.R76137						MC20.MG24.AS1.I27.R53434
																					MC20.MG31.AS1.I33.R76342						MC20.MG24.AS1.I27.R53467
																					MC20.MG31.AS1.I33.R7650						MC20.MG24.AS1.I27.R53473
																					MC20.MG31.AS1.I33.R7670						MC20.MG24.AS1.I27.R53475
																					MC20.MG31.AS1.I33.R76814						MC20.MG24.AS1.I27.R53521
																					MC20.MG31.AS1.I33.R76915						MC20.MG24.AS1.I27.R53525
																					MC20.MG31.AS1.I33.R76925						MC20.MG24.AS1.I27.R53541
																					MC20.MG31.AS1.I33.R76967						MC20.MG24.AS1.I27.R53623
																					MC20.MG31.AS1.I33.R76991						MC20.MG24.AS1.I27.R53626
																					MC20.MG31.AS1.I33.R77010						MC20.MG24.AS1.I27.R53673
																					MC20.MG31.AS1.I33.R77382						MC20.MG24.AS1.I27.R53756
																					MC20.MG31.AS1.I33.R77459						MC20.MG24.AS1.I27.R53759
																					MC20.MG31.AS1.I33.R77786						MC20.MG24.AS1.I27.R53782
																					MC20.MG31.AS1.I33.R78071						MC20.MG24.AS1.I27.R5379
																					MC20.MG31.AS1.I33.R78152						MC20.MG24.AS1.I27.R5384
																					MC20.MG31.AS1.I33.R78160						MC20.MG24.AS1.I27.R53897
																					MC20.MG31.AS1.I33.R78402						MC20.MG24.AS1.I27.R53919
																					MC20.MG31.AS1.I33.R78440						MC20.MG24.AS1.I27.R53988
																					MC20.MG31.AS1.I33.R78455						MC20.MG24.AS1.I27.R54047
																					MC20.MG31.AS1.I33.R7876						MC20.MG24.AS1.I27.R54058
																					MC20.MG31.AS1.I33.R78794						MC20.MG24.AS1.I27.R54134
																					MC20.MG31.AS1.I33.R78796						MC20.MG24.AS1.I27.R54138
																					MC20.MG31.AS1.I33.R78853						MC20.MG24.AS1.I27.R54174
																					MC20.MG31.AS1.I33.R78905						MC20.MG24.AS1.I27.R54187
																					MC20.MG31.AS1.I33.R7897						MC20.MG24.AS1.I27.R54325
																					MC20.MG31.AS1.I33.R79010						MC20.MG24.AS1.I27.R54375
																					MC20.MG31.AS1.I33.R79036						MC20.MG24.AS1.I27.R54466
																					MC20.MG31.AS1.I33.R79079						MC20.MG24.AS1.I27.R54496
																					MC20.MG31.AS1.I33.R79285						MC20.MG24.AS1.I27.R54645
																					MC20.MG31.AS1.I33.R79370						MC20.MG24.AS1.I27.R54776
																					MC20.MG31.AS1.I33.R79612						MC20.MG24.AS1.I27.R54791
																					MC20.MG31.AS1.I33.R79659						MC20.MG24.AS1.I27.R54882
																					MC20.MG31.AS1.I33.R79693						MC20.MG24.AS1.I27.R54891
																					MC20.MG31.AS1.I33.R79859						MC20.MG24.AS1.I27.R54979
																					MC20.MG31.AS1.I33.R79861						MC20.MG24.AS1.I27.R55042
																					MC20.MG31.AS1.I33.R79892						MC20.MG24.AS1.I27.R55076
																					MC20.MG31.AS1.I33.R79986						MC20.MG24.AS1.I27.R55168
																					MC20.MG31.AS1.I33.R80045						MC20.MG24.AS1.I27.R55202
																					MC20.MG31.AS1.I33.R80053						MC20.MG24.AS1.I27.R55263
																					MC20.MG31.AS1.I33.R80055						MC20.MG24.AS1.I27.R55283
																					MC20.MG31.AS1.I33.R80078						MC20.MG24.AS1.I27.R5529
																					MC20.MG31.AS1.I33.R80234						MC20.MG24.AS1.I27.R55335
																					MC20.MG31.AS1.I33.R80308						MC20.MG24.AS1.I27.R55364
																					MC20.MG31.AS1.I33.R80450						MC20.MG24.AS1.I27.R55377
																					MC20.MG31.AS1.I33.R80492						MC20.MG24.AS1.I27.R55421
																					MC20.MG31.AS1.I33.R805						MC20.MG24.AS1.I27.R55482
																					MC20.MG31.AS1.I33.R80649						MC20.MG24.AS1.I27.R5575
																					MC20.MG31.AS1.I33.R80927						MC20.MG24.AS1.I27.R560
																					MC20.MG31.AS1.I33.R81139						MC20.MG24.AS1.I27.R5602
																					MC20.MG31.AS1.I33.R81286						MC20.MG24.AS1.I27.R5694
																					MC20.MG31.AS1.I33.R81347						MC20.MG24.AS1.I27.R5752
																					MC20.MG31.AS1.I33.R81352						MC20.MG24.AS1.I27.R5790
																					MC20.MG31.AS1.I33.R81581						MC20.MG24.AS1.I27.R5921
																					MC20.MG31.AS1.I33.R82305						MC20.MG24.AS1.I27.R6020
																					MC20.MG31.AS1.I33.R8257						MC20.MG24.AS1.I27.R6045
																					MC20.MG31.AS1.I33.R82729						MC20.MG24.AS1.I27.R6087
																					MC20.MG31.AS1.I33.R82925						MC20.MG24.AS1.I27.R6120
																					MC20.MG31.AS1.I33.R82990						MC20.MG24.AS1.I27.R613
																					MC20.MG31.AS1.I33.R83095						MC20.MG24.AS1.I27.R619
																					MC20.MG31.AS1.I33.R8325						MC20.MG24.AS1.I27.R6195
																					MC20.MG31.AS1.I33.R833						MC20.MG24.AS1.I27.R6247
																					MC20.MG31.AS1.I33.R83329						MC20.MG24.AS1.I27.R6318
																					MC20.MG31.AS1.I33.R8336						MC20.MG24.AS1.I27.R6371
																					MC20.MG31.AS1.I33.R83398						MC20.MG24.AS1.I27.R6412
																					MC20.MG31.AS1.I33.R83493						MC20.MG24.AS1.I27.R6421
																					MC20.MG31.AS1.I33.R83770						MC20.MG24.AS1.I27.R6467
																					MC20.MG31.AS1.I33.R83951						MC20.MG24.AS1.I27.R6569
																					MC20.MG31.AS1.I33.R84160						MC20.MG24.AS1.I27.R6682
																					MC20.MG31.AS1.I33.R84250						MC20.MG24.AS1.I27.R6699
																					MC20.MG31.AS1.I33.R84308						MC20.MG24.AS1.I27.R6706
																					MC20.MG31.AS1.I33.R84475						MC20.MG24.AS1.I27.R6898
																					MC20.MG31.AS1.I33.R84521						MC20.MG24.AS1.I27.R6939
																					MC20.MG31.AS1.I33.R84840						MC20.MG24.AS1.I27.R6959
																					MC20.MG31.AS1.I33.R85048						MC20.MG24.AS1.I27.R6984
																					MC20.MG31.AS1.I33.R85122						MC20.MG24.AS1.I27.R7019
																					MC20.MG31.AS1.I33.R85143						MC20.MG24.AS1.I27.R7029
																					MC20.MG31.AS1.I33.R85167						MC20.MG24.AS1.I27.R7052
																					MC20.MG31.AS1.I33.R85346						MC20.MG24.AS1.I27.R7078
																					MC20.MG31.AS1.I33.R85367						MC20.MG24.AS1.I27.R7137
																					MC20.MG31.AS1.I33.R85428						MC20.MG24.AS1.I27.R7179
																					MC20.MG31.AS1.I33.R85712						MC20.MG24.AS1.I27.R7181
																					MC20.MG31.AS1.I33.R85809						MC20.MG24.AS1.I27.R7222
																					MC20.MG31.AS1.I33.R85810						MC20.MG24.AS1.I27.R7306
																					MC20.MG31.AS1.I33.R85936						MC20.MG24.AS1.I27.R7368
																					MC20.MG31.AS1.I33.R85983						MC20.MG24.AS1.I27.R7401
																					MC20.MG31.AS1.I33.R86057						MC20.MG24.AS1.I27.R743
																					MC20.MG31.AS1.I33.R86181						MC20.MG24.AS1.I27.R7474
																					MC20.MG31.AS1.I33.R86297						MC20.MG24.AS1.I27.R7488
																					MC20.MG31.AS1.I33.R86327						MC20.MG24.AS1.I27.R7541
																					MC20.MG31.AS1.I33.R86417						MC20.MG24.AS1.I27.R7597
																					MC20.MG31.AS1.I33.R86418						MC20.MG24.AS1.I27.R7629
																					MC20.MG31.AS1.I33.R86555						MC20.MG24.AS1.I27.R7653
																					MC20.MG31.AS1.I33.R86578						MC20.MG24.AS1.I27.R7685
																					MC20.MG31.AS1.I33.R86579						MC20.MG24.AS1.I27.R7742
																					MC20.MG31.AS1.I33.R86754						MC20.MG24.AS1.I27.R7965
																					MC20.MG31.AS1.I33.R86850						MC20.MG24.AS1.I27.R8032
																					MC20.MG31.AS1.I33.R86883						MC20.MG24.AS1.I27.R8040
																					MC20.MG31.AS1.I33.R86944						MC20.MG24.AS1.I27.R8104
																					MC20.MG31.AS1.I33.R86982						MC20.MG24.AS1.I27.R8108
																					MC20.MG31.AS1.I33.R87014						MC20.MG24.AS1.I27.R8119
																					MC20.MG31.AS1.I33.R87063						MC20.MG24.AS1.I27.R8159
																					MC20.MG31.AS1.I33.R87150						MC20.MG24.AS1.I27.R8217
																					MC20.MG31.AS1.I33.R87230						MC20.MG24.AS1.I27.R8348
																					MC20.MG31.AS1.I33.R87235						MC20.MG24.AS1.I27.R8442
																					MC20.MG31.AS1.I33.R87270						MC20.MG24.AS1.I27.R8479
																					MC20.MG31.AS1.I33.R87375						MC20.MG24.AS1.I27.R8482
																					MC20.MG31.AS1.I33.R87686						MC20.MG24.AS1.I27.R8498
																					MC20.MG31.AS1.I33.R87752						MC20.MG24.AS1.I27.R8571
																					MC20.MG31.AS1.I33.R87805						MC20.MG24.AS1.I27.R8602
																					MC20.MG31.AS1.I33.R87832						MC20.MG24.AS1.I27.R8685
																					MC20.MG31.AS1.I33.R87913						MC20.MG24.AS1.I27.R8729
																					MC20.MG31.AS1.I33.R88149						MC20.MG24.AS1.I27.R8751
																					MC20.MG31.AS1.I33.R88188						MC20.MG24.AS1.I27.R8811
																					MC20.MG31.AS1.I33.R88242						MC20.MG24.AS1.I27.R8943
																					MC20.MG31.AS1.I33.R88535						MC20.MG24.AS1.I27.R9072
																					MC20.MG31.AS1.I33.R88544						MC20.MG24.AS1.I27.R9094
																					MC20.MG31.AS1.I33.R8855						MC20.MG24.AS1.I27.R9207
																					MC20.MG31.AS1.I33.R88589						MC20.MG24.AS1.I27.R9311
																					MC20.MG31.AS1.I33.R88619						MC20.MG24.AS1.I27.R9344
																					MC20.MG31.AS1.I33.R88641						MC20.MG24.AS1.I27.R9448
																					MC20.MG31.AS1.I33.R88687						MC20.MG24.AS1.I27.R946
																					MC20.MG31.AS1.I33.R88703						MC20.MG24.AS1.I27.R9500
																					MC20.MG31.AS1.I33.R8967						MC20.MG24.AS1.I27.R951
																					MC20.MG31.AS1.I33.R8998						MC20.MG24.AS1.I27.R9617
																					MC20.MG31.AS1.I33.R9001						MC20.MG24.AS1.I27.R9658
																					MC20.MG31.AS1.I33.R9039						MC20.MG24.AS1.I27.R9694
																					MC20.MG31.AS1.I33.R9324						MC20.MG24.AS1.I27.R9697
																					MC20.MG31.AS1.I33.R9793						MC20.MG24.AS1.I27.R9732
																					MC20.MG31.AS1.I33.R9861						MC20.MG24.AS1.I27.R9768
																					MC20.MG31.AS1.I33.R9977						MC20.MG24.AS1.I27.R9780
																					MC20.MG31.AS1.I33.R999						MC20.MG24.AS1.I27.R991
																											MC20.MG24.AS1.I3.C27
																											MC20.MG24.AS1.I3.C8
																											MC20.MG24.AS1.I4.C2
																											MC20.MG24.AS1.I5.C5
																											MC20.MG24.AS1.I7.C3
